# Supplementary material for: Vampires and nurses are rated differently by younger and older adults—Age-comparative norms of imageability and emotionality for about 2500 German nouns
Source: Behav Res Methods. 2020 Feb 12;52(3):980–9. doi: 10.3758/s13428-019-01294-2 (PMC7280351; doi:10.3758/s13428-019-01294-2)
Supplement: Supplementary file 1 — (DAT 460 kb) [file 13428_2019_1294_MOESM1_ESM.dat]

WORD	IM_Y_M_N	IM_Y_F_N	IM_O_M_N	IM_O_F_N	IM_Y_M_MEAN	IM_Y_F_MEAN	IM_O_M_MEAN	IM_O_F_MEAN	IM_Y_M_SD	IM_Y_F_SD	IM_O_M_SD	IM_O_F_SD	IM_Y_N	IM_O_N	IM_Y_MEAN	IM_O_MEAN	IM_Y_SD	IM_O_SD	EM_Y_M_N	EM_Y_F_N	EM_O_M_N	EM_O_F_N	EM_Y_M_MEAN	EM_Y_F_MEAN	EM_O_M_MEAN	EM_O_F_MEAN	EM_Y_M_SD	EM_Y_F_SD	EM_O_M_SD	EM_O_F_SD	EM_Y_N	EM_O_N	EM_Y_MEAN	EM_O_MEAN	EM_Y_SD	EM_O_SD	F_Unknown_Y	F_Unknown_O
Aal	11	10	12	10	90.55	93.4	97.33	90.5	12.3	12.3	3.26	14.79	21	22	91.9	94.23	12.08	10.56	10	8	9	10	22.6	-15.13	45.44	27.8	37.05	24.1	27.38	51.56	18	19	5.83	36.16	36.58	41.77	0	0
Aas	10	10	13	11	73.1	57.5	80.69	59.64	20.44	33.55	22.13	34.92	20	24	65.3	71.04	28.2	30.01	10	9	11	8	-49.7	-49	-49.09	-81.5	23.77	27.46	34.06	21.04	19	19	-49.37	-62.74	24.86	32.97	0	0
Abend	10	11	10	12	53.8	52.27	59.9	74.08	28.96	23.63	25.21	25.97	21	22	53	67.64	25.63	26.04	8	10	8	11	46.13	40.2	42.13	56.55	16.84	34.42	26.29	25.94	18	19	42.83	50.47	27.44	26.39	0	0
Abendbrot	9	11	13	10	64.89	62.64	84.85	82.5	18.72	14.12	21.24	21.13	20	23	63.65	83.83	15.93	20.74	8	11	11	9	35.5	23.91	66.64	49.67	21.94	24.28	22.06	36.59	19	20	28.79	59	23.44	29.92	0	0
Abfall	8	10	13	9	73.38	77.8	67.46	60.89	28.84	23.41	27.28	30.23	18	22	75.83	64.77	25.26	28	10	8	8	11	-49.1	-28.13	-43.88	-46.91	24.75	15.05	34.31	25.5	18	19	-39.78	-45.63	23.08	28.66	0	0
Abgrund	11	9	11	11	72.27	61.33	72.64	68.64	23.04	9.33	24.48	30.41	20	22	67.35	70.64	18.63	27.01	9	9	8	11	-41.22	-53	-57.75	-59.55	50.04	33.07	22.59	35.79	18	19	-47.11	-58.79	41.59	30.18	0	0
Abhang	11	8	12	11	64.09	50.5	88.67	74.45	36.02	13.73	12.83	27.1	19	23	58.37	81.87	29.01	21.65	10	8	8	11	-14.8	-22.38	-14.63	-17.82	31.44	37.31	26.42	51.2	18	19	-18.17	-16.47	33.34	41.6	0	0
Abnahme	11	10	13	10	23.64	20.6	27.38	44.5	22.2	20.53	22	25.72	21	23	22.19	34.83	20.94	24.7	9	9	10	9	-21.67	-13.33	14.6	-1.56	27.35	34.16	18.72	26.51	18	19	-17.5	6.95	30.32	23.59	0	0
Abrechnung	10	9	13	10	47.1	28	58.08	52.5	30.52	29.42	34.39	35.85	19	23	38.05	55.65	30.77	34.33	11	8	9	10	-27.55	-48.13	2.89	1.7	40.62	30.88	8.15	27.57	19	19	-36.21	2.26	37.37	20.25	0	0
Abruf	14	15	15	17	13.36	22.93	34.07	31.88	10.92	19.48	28.51	25.11	29	32	18.31	32.91	16.39	26.34	8	10	9	10	-18.75	-11.1	4	1.7	27.01	21.07	13.89	7.7	18	19	-14.5	2.79	23.47	10.81	0	0
Absicht	10	9	12	11	14.4	12	18.92	42.18	17.12	13.16	21.43	31.69	19	23	13.26	30.04	15	28.76	8	10	9	10	-2.75	-1.4	6.78	8.3	30.09	44.1	8.57	9.99	18	19	-2	7.58	37.46	9.12	0	0
Absprache	10	8	13	9	27.9	19.25	45	35.11	28.2	13.36	34.21	26.99	18	22	24.06	40.95	22.67	31.16	10	8	10	9	-6.2	11.63	6.6	16.33	22.82	28.05	7.65	33.38	18	19	1.72	11.21	26.13	23.44	0	0
Abstimmung	11	11	13	9	40.91	34.36	43.77	42.33	31.34	22.94	34.49	31.66	22	22	37.64	43.18	27.01	32.59	10	9	11	8	15.5	13.67	17.82	20	23.42	27.77	21.22	31.47	19	19	14.63	18.74	24.86	25.23	0	0
Abwasch	9	9	13	10	62.78	76.89	82	87.1	35.75	14.11	25.77	18.53	18	23	69.83	84.22	27.35	22.57	9	10	10	9	-47.22	-33.1	-24.5	-16.44	38.16	31.25	33.74	35.05	19	19	-39.79	-20.68	34.47	33.65	0	0
Abweichung	9	11	12	11	24.44	17.91	36.17	41.18	22.12	21.94	28.32	32.48	20	23	20.85	38.57	21.69	29.78	9	10	9	10	-4	-14.3	-8.89	-14.9	42.95	14.39	25.16	17.08	19	19	-9.42	-12.05	30.84	20.9	0	0
Abwertung	9	11	12	11	27.56	15.09	34.58	33.73	27.6	14.65	33.86	32.38	20	23	20.7	34.17	21.77	32.4	10	9	9	10	-47.4	-51.67	-31.67	-29.1	20.86	26.42	30.5	28.33	19	19	-49.42	-30.32	23.08	28.58	0	0
Achsel	11	10	13	10	72.36	77	74	83.9	21.34	26.54	18.54	18.48	21	23	74.57	78.3	23.46	18.77	10	9	10	9	-3.6	-7	.8	13.56	23.17	31.21	20.27	16.79	19	19	-5.21	6.84	26.54	19.33	0	0
Achterbahn	10	9	12	10	85.6	91.78	93.67	86.4	14.37	10.57	8.32	15	19	22	88.53	90.36	12.76	12.1	9	10	8	11	10.56	11.5	-19.88	-18.27	34.79	52.05	41.47	38.32	19	19	11.05	-18.95	43.51	38.54	0	0
Acker	10	10	11	12	75.5	83.2	85.64	84.42	28.21	12.28	15.32	16.76	20	23	79.35	85	21.54	15.74	8	11	10	9	24.5	14.55	36.6	17.89	23.42	18.25	26.34	9.96	19	19	18.74	27.74	20.59	21.98	0	0
Ader	11	9	12	11	86.91	74.22	86.17	93	15.98	19.82	14.5	11.77	20	23	81.2	89.43	18.49	13.43	9	9	9	10	.78	-10.44	-1	24.7	24.47	18.2	24.46	29.08	18	19	-4.83	12.53	21.7	29.37	0	0
Adler	10	9	11	12	87.9	90.33	94.73	87.75	11.5	12.45	6.8	14.3	19	23	89.05	91.09	11.69	11.66	9	9	10	9	54.89	19.67	51.3	50.56	22.79	27.22	44.17	23.65	18	19	37.28	50.95	30.36	34.99	0	0
Admiral	10	10	13	9	62.5	54.3	73.08	68.56	34.4	22.89	28.73	35.68	20	22	58.4	71.23	28.75	31.01	9	9	9	10	-22	-14	1.89	2	43.79	31.69	25.2	15.97	18	19	-18	1.95	37.31	20.24	0	0
Affe	10	10	14	8	93.8	94.2	94.64	92.38	6.99	7.11	11.61	10.74	20	22	94	93.82	6.87	11.1	10	9	10	9	33	28.89	30.7	28.44	35.6	36.45	31.45	31.21	19	19	31.05	29.63	35.05	30.47	0	0
Affekt	9	12	13	10	14.11	21.67	30.15	31.2	13.83	20.51	33.44	31.12	21	23	18.43	30.61	17.96	31.72	8	10	9	10	-39.25	-17	-32	-35.1	28.28	24.97	41.98	36.96	18	19	-26.89	-33.63	28.09	38.32	0	0
Agent	10	9	11	12	51	50.67	66.18	62.42	30.91	27.4	35.67	27.93	19	23	50.84	64.22	28.49	31.18	10	8	9	10	-1.4	0	-41.33	-55.2	35.14	24.92	35.14	34.5	18	19	-.78	-48.63	30.16	34.56	0	0
Ahnung	11	9	12	11	28.82	9.67	22.75	36.27	22.53	10.94	21.97	31.51	20	23	20.2	29.22	20.33	27.21	9	9	9	11	7.89	33.11	3.56	7.09	30.78	29.98	27.51	22.29	18	20	20.5	5.5	32.21	24.15	0	0
Ahorn	12	8	13	10	85.67	70.38	88.85	78.5	12.18	26.47	16.1	25.64	20	23	79.55	84.35	20.08	20.92	9	9	9	10	36.56	30.44	51.11	38.6	25.35	38.8	24.91	28.1	18	19	33.5	44.53	31.95	26.68	0	0
Akrobat	10	9	13	11	60.2	66.56	86	88.73	26.12	25.12	14.26	13.33	19	24	63.21	87.25	25.15	13.61	9	9	9	10	14.89	36.11	18.56	31.3	35	34.53	30.1	38.2	18	19	25.5	25.26	35.45	34.28	.04	0
Akt	10	10	11	12	36.8	46.7	60.64	54.25	32.05	34.61	36.83	37.4	20	23	41.75	57.3	32.86	36.42	10	8	9	11	23.9	34	27.67	20.09	50.6	30.73	20.62	28.91	18	20	28.39	23.5	42.08	25.17	0	0
Akte	10	10	11	12	67	81.5	78.55	76.25	25.64	12.06	21	26.14	20	23	74.25	77.35	20.87	23.31	9	10	10	10	-28	-11.4	-21.9	1.7	40.02	16.65	35.71	25.3	19	20	-19.26	-10.1	30.38	32.47	0	0
Aktion	11	8	11	12	26.18	25.13	28.73	49.83	30.35	14.63	20.5	37.66	19	23	25.74	39.74	24.4	31.88	10	8	10	9	14.4	24.13	8.3	12.11	20.59	23.61	24.78	19.64	18	19	18.72	10.11	21.88	21.96	0	0
Akustik	10	10	13	10	39.2	31.1	43.77	45.2	35.24	28.2	38.94	31.07	20	23	35.15	44.39	31.34	34.97	10	9	9	10	42.9	29	21.78	32.1	34.86	29.94	32.68	33.28	19	19	36.32	27.21	32.51	32.5	0	0
Albernheit	12	10	12	11	23	40.2	33.25	42.91	19.79	29.32	26.31	23.6	22	23	30.82	37.87	25.5	24.98	10	9	8	11	22.9	26.11	-7.25	-.36	50.63	39.24	27.2	23.64	19	19	24.42	-3.26	44.37	24.7	0	0
Album	10	11	13	9	73.1	76.73	87.31	81.56	25.34	20.18	15.5	19.4	21	22	75	84.95	22.27	17	9	9	7	12	23.11	45.67	48.71	33	32.62	32.79	30.85	24.45	18	19	34.39	38.79	33.79	27.26	0	0
Alge	8	11	13	10	67	75.55	76.23	84.7	19.86	19.09	31.72	14.14	19	23	71.95	79.91	19.36	25.48	8	10	10	9	-1.88	-9.2	6.8	-3.11	30.84	20.19	42.95	28.26	18	19	-5.94	2.11	24.93	36.1	0	0
Algebra	9	10	12	11	33.89	38.9	49.92	65.91	28.59	23.99	29.45	36.54	19	23	36.53	57.57	25.64	33.28	9	9	9	10	-23.33	-7.89	0	3	43.05	29.04	37.07	36.46	18	19	-15.61	1.58	36.5	35.75	0	0
Alkohol	10	11	12	10	61.8	75.73	53.42	78.8	34.28	18.66	30.62	23.64	21	22	69.1	64.95	27.45	29.97	9	9	10	9	-8.56	7.22	-55.6	-24	51.13	48.67	35.22	49.71	18	19	-.67	-40.63	49.1	44.51	0	0
All	11	9	13	10	71.18	64.11	67.69	52.2	28.91	27.72	31.09	38.51	20	23	68	60.96	27.87	34.58	9	9	10	9	41.44	38.44	16.7	26	31.54	49.96	22.95	19.59	18	19	39.94	21.11	40.56	21.37	0	0
Allee	10	9	11	11	83.6	90.78	91.82	83.64	13.96	12.99	9.2	15.69	19	22	87	87.73	13.64	13.23	10	8	9	10	27.1	43.25	47.89	51.7	37.52	38.69	22.34	23.96	18	19	34.28	49.89	37.81	22.64	0	0
Alpen	10	11	11	12	87.4	77	91.82	80.92	10.27	19.11	12.81	19.46	21	23	81.95	86.13	16.07	17.17	9	10	8	11	48.22	50.2	71.88	39.82	36.96	37.76	26.64	46.75	19	19	49.26	53.32	36.35	41.89	0	0
Altar	12	8	10	12	86.67	82.75	95	92.17	16.05	14.57	6.04	10.25	20	22	85.1	93.45	15.2	8.53	7	12	10	10	-11.71	12.92	48.1	24.1	48.22	29.29	33.11	38.42	19	20	3.84	36.1	38.06	37.02	0	0
Alte	9	11	12	11	38	45.55	72.92	73.36	26.39	25	23.17	34.52	20	23	42.15	73.13	25.24	28.47	9	9	9	10	-24.44	-26.78	-1	22.1	21.05	33.81	32.52	37.1	18	19	-25.61	11.16	27.35	36.04	0	0
Amateur	11	8	12	11	31.09	27.88	43.17	59.82	27.41	18.6	36.02	32.26	19	23	29.74	51.13	23.55	34.56	11	8	9	10	2	-14.25	7.11	12.7	29.45	12.41	22.14	35.72	19	19	-4.84	10.05	24.69	29.39	0	0
Ambulanz	10	11	12	11	71.9	64.73	72.67	73.82	22.27	29.23	21.08	25.54	21	23	68.14	73.22	25.77	22.78	7	11	9	10	-28	-19.27	7.78	-10.6	31.49	29.53	52.49	54.83	18	19	-22.67	-1.89	29.7	53.07	0	0
Ameise	10	11	12	11	91.8	93.91	96.08	89.73	9.72	7.41	5.99	12.51	21	23	92.9	93.04	8.43	9.98	9	10	8	11	30.33	15.2	8	-9.91	17.61	33.54	54.94	42.91	19	19	22.37	-2.37	27.58	47.74	0	0
Amme	10	11	12	11	60	60.82	70.17	75.18	26.01	15.62	31.86	24.09	21	23	60.43	72.57	20.65	27.89	10	9	10	9	12.9	15.22	38.5	22.89	23.77	15.43	24.02	26.74	19	19	14	31.11	19.74	25.89	0	0
Ampel	10	11	12	11	92.8	96.36	96.08	88.64	8.42	2.8	6.37	13.22	21	23	94.67	92.52	6.26	10.69	10	9	9	10	-2	-2.11	29.89	17.1	22.26	18.12	33.14	20.43	19	19	-2.05	23.16	19.84	27.2	0	0
Amphore	10	8	10	11	65.2	52.5	69.1	57.82	32.64	31.26	33.94	37.39	18	21	59.56	63.19	31.76	35.36	11	8	7	11	28.36	14.63	25.43	17.45	27.39	30.78	24.9	33.55	19	18	22.58	20.56	28.88	29.95	.04	.07
Amsel	10	10	11	12	87.5	89.1	96.18	89.83	12.7	11.43	5.83	12.25	20	23	88.3	92.87	11.78	10.05	10	8	9	10	33.3	24.63	62.33	54.8	31.05	14.87	25.94	25.48	18	19	29.44	58.37	24.92	25.27	0	0
Amt	10	10	12	11	42.6	45.9	61.33	65.45	34.55	26.48	27.11	34.17	20	23	44.25	63.3	30.01	30.05	10	8	10	9	-25.3	-19.63	-11.5	-.33	31.06	18.26	34.03	22.59	18	19	-22.78	-6.21	25.62	28.96	0	0
Amulett	10	9	11	11	78.9	82	83.18	75.64	20.09	20.77	26.43	24.39	19	22	80.37	79.41	19.9	25.12	9	10	9	10	15.22	34.7	14.22	36.2	22.34	33.5	51.05	38.77	19	19	25.47	25.79	29.71	45.13	0	0
Ananas	12	8	11	12	93	95.38	97.82	93.08	10.89	5.04	6.31	9.77	20	23	93.95	95.35	8.91	8.46	10	8	9	10	31.7	48.88	48.89	61.4	22.81	33.26	25.08	27.2	18	19	39.33	55.47	28.43	26.28	0	0
Anbetung	10	10	12	11	33.7	26.5	47.58	45.55	26.9	24.67	30.16	29.57	20	23	30.1	46.61	25.39	29.21	9	9	10	9	-24.33	6.11	16.1	-23.56	58.72	30.71	47.48	49.64	18	19	-9.11	-2.68	48.08	51.35	0	0
Änderung	10	10	12	12	15.2	17.3	33.75	48.75	14.02	19.82	32.33	35.71	20	24	16.25	41.25	16.74	34.18	9	10	9	10	10.56	14.3	-12.11	0	20.04	25.21	28.19	25.1	19	19	12.53	-5.74	22.36	26.58	0	0
Andeutung	12	9	11	11	16.5	13.44	26.09	22.27	17.92	9.53	34.5	23.65	21	22	15.19	24.18	14.67	28.93	10	9	9	10	-15.6	-13	-4.78	6.1	30.61	14.85	22.18	18.59	19	19	-14.37	.95	23.84	20.56	0	0
Anfang	9	11	10	13	25.56	24.18	45.6	45.38	26.79	19.86	33.16	34.99	20	23	24.8	45.48	22.59	33.43	10	8	10	9	19.3	44.38	17.7	20.56	27.91	36.28	23.54	28.99	18	19	30.44	19.05	33.45	25.55	0	0
Anführer	10	10	12	11	58.2	42	61.33	57.36	30.86	22.15	27.73	32.71	20	23	50.1	59.43	27.43	29.58	10	9	9	11	-27	-24.78	-7.67	-9.91	23.65	25.76	22.16	20.3	19	20	-25.95	-8.9	23.99	20.61	0	0
Angabe	11	10	12	11	15.91	11.9	37	36.55	15.2	15.71	34.3	33.96	21	23	14	36.78	15.19	33.35	8	10	11	8	1.13	3.3	-35.36	-11.75	17.5	5.01	30.43	31.81	18	19	2.33	-25.42	11.86	32.43	0	0
Angeber	9	11	11	12	35.78	28.45	38.55	59.92	22.59	20.12	19.09	34.89	20	23	31.75	49.7	21.02	29.89	11	8	9	11	-44.36	-51	-44.67	-46.82	24.24	20.59	30.52	23.74	19	20	-47.16	-45.85	22.42	26.27	0	0
Angebot	11	9	13	10	38.18	23.11	37.38	48.6	26.4	20.16	33.35	32.99	20	23	31.4	42.26	24.44	32.93	7	11	10	9	21.71	19.91	18.7	30.67	25	18.25	16.06	27.4	18	19	20.61	24.37	20.43	22.37	0	0
Angel	12	10	12	11	87.25	92.4	94.25	87.45	12.3	7.99	7.37	20.02	22	23	89.59	91	10.65	14.88	8	11	9	10	33.63	6	12.44	13.8	36.29	35.63	36.66	19.63	19	19	17.63	13.16	37.6	28.12	0	0
Angriff	12	9	13	10	53.5	36.89	50.38	49.6	31.34	27.03	31.44	33.1	21	23	46.38	50.04	30.06	31.43	13	13	12	13	-43.54	-71.77	-79.92	-74.46	40.59	32.32	17.07	29.83	26	25	-57.65	-77.08	38.72	24.21	0	0
Angst	10	11	13	10	38.8	18.73	48	47.4	28.49	15.53	35.77	25.58	21	23	28.29	47.74	24.32	31.08	13	13	12	13	-63.77	-79.85	-63.67	-64.77	30.81	24.85	40.14	42.34	26	25	-71.81	-64.24	28.62	40.44	0	0
Anhänger	11	9	12	10	73	59.89	81.5	80.1	28.93	26.07	17.25	19.38	20	22	67.1	80.86	27.78	17.81	9	9	9	10	-4.89	-10.44	7.78	16.4	29.24	13.11	6.38	10.98	18	19	-7.67	12.32	22.17	9.89	0	0
Anker	8	10	12	10	84.13	88.8	97.08	78.3	23.68	12.58	3.63	18.7	18	22	86.72	88.55	17.9	15.76	10	8	10	9	23.4	18.63	29	12.33	28.63	25.34	25.76	12.11	18	19	21.28	21.11	26.54	21.68	0	0
Anlass	9	10	13	10	31.22	13.1	26.31	35.1	27.06	18.97	29.45	28.95	19	23	21.68	30.13	24.33	28.91	8	10	9	10	15.38	12.6	9.89	13.9	30.84	24.67	16.14	20.72	18	19	13.83	12	26.76	18.29	0	0
Anleitung	11	10	13	10	48	36.1	44	45	37.06	24.15	29.48	37.92	21	23	42.33	44.43	31.41	32.59	8	10	9	10	6	-2.3	34.44	19.6	28.17	36.1	36.26	27	18	19	1.39	26.63	32.17	31.73	0	0
Anmaßung	11	10	12	11	15.82	12.4	27.83	31.27	14.43	17.51	24.83	32.91	21	23	14.19	29.48	15.66	28.35	9	9	9	10	-57.78	-40	-41.67	-49.9	24.55	19.72	39.53	36.83	18	19	-48.89	-46	23.46	37.29	0	0
Anorak	9	11	13	10	91.56	87.27	94.77	90.6	9	12.66	7.68	12.99	20	23	89.2	92.96	11.1	10.28	7	11	8	11	32.43	31.82	36.25	39.82	17.8	36.84	32.77	28.98	18	19	32.06	38.32	30.17	29.79	0	0
Anordnung	11	8	11	12	31.55	22.25	41.73	40.58	22.41	12.46	32.27	32.33	19	23	27.63	41.13	19.02	31.56	8	11	8	11	-20	-12.09	-25.13	-7.73	56.26	17.64	34.7	33.54	19	19	-15.42	-15.05	37.68	34.22	0	0
Anregung	11	9	14	9	20.55	9.78	25.57	31.89	22.27	9.95	30.68	29.8	20	23	15.7	28.04	18.25	29.82	10	8	10	9	28.3	33.63	10.9	40.33	14.04	25.37	36.56	42.36	18	19	30.67	24.84	19.41	41.16	0	0
Anschein	10	10	11	12	10	18.3	18.09	26.42	7.9	10.5	17.59	24.89	20	23	14.15	22.43	10	21.64	10	9	8	11	-9	-5	-4.13	-11.64	19.47	16.37	6.45	30.53	19	19	-7.11	-8.47	17.69	23.42	0	0
Ansicht	11	9	11	11	29.36	18.67	47.91	46.91	29.36	18.85	30.94	32.55	20	22	24.55	47.41	25.16	31	11	8	8	11	15.55	16.13	14.63	22.27	14	18.46	19.21	24.99	19	19	15.79	19.05	15.54	22.48	0	0
Anspitzer	11	10	13	10	81.18	90.5	75.69	72	22.29	9.54	20.91	22.9	21	23	85.62	74.09	17.66	21.36	9	9	9	10	-7	-2.11	5.11	15.9	20.44	22.35	34.78	21.7	18	19	-4.56	10.79	20.93	28.35	0	0
Anspruch	12	8	12	11	16.33	18.63	19.67	30.45	20.94	14.54	18.6	28.18	20	23	17.25	24.83	18.25	23.76	7	11	9	10	-28.71	12.55	.89	8.8	40.41	36.31	31.36	15.66	18	19	-3.5	5.05	42.19	24.01	0	0
Anstand	8	12	12	11	22.75	14.67	49.08	38.55	21.69	17.09	34.87	33.74	20	23	17.9	44.04	18.95	33.98	10	9	9	9	5.8	33.44	54	45.33	33.66	49.71	27.6	43.67	19	18	18.89	49.67	43.2	35.72	0	0
Antarktis	10	10	12	11	73.6	67.7	82.58	64.27	30.66	22.47	22.81	29.88	20	23	70.65	73.83	26.34	27.45	10	8	9	10	42.9	11.75	39.56	18.7	37.08	36.08	55.94	24.53	18	19	29.06	28.58	38.96	42.5	0	0
Anteil	9	10	12	11	27.89	24.3	31.25	43.18	30.37	20.22	29.09	32.46	19	23	26	36.96	24.85	30.65	9	10	10	9	14.67	3.3	8.3	7	21.73	11.57	15.33	19.79	19	19	8.68	7.68	17.63	17.09	0	0
Antenne	10	9	13	10	83.2	85.67	85.23	83.6	15.87	16.29	19.63	19.25	19	23	84.37	84.52	15.67	19.04	9	10	8	10	10.11	12	25.38	14.7	32.44	19.85	29.19	25.81	19	18	11.11	19.44	25.8	27.08	0	0
Antrieb	12	8	12	11	49.67	29.5	48.67	48.45	30.09	25.65	31.74	33.02	20	23	41.6	48.57	29.49	31.61	8	10	7	12	19.5	26.5	30.86	26.17	27.89	23.31	27.82	29.14	18	19	23.39	27.89	24.92	27.97	0	0
Antwort	12	8	12	10	24.33	11.25	52.33	42.1	28.83	7.21	38.12	32.29	20	22	19.1	47.68	23.31	35.14	9	9	9	10	21.56	33.78	12.67	26.9	20.91	27.86	20.25	28.69	18	19	27.67	20.16	24.71	25.44	0	.03
Anwalt	10	9	11	12	61.6	49.22	57.73	78.92	26.96	15.29	27.97	17.68	19	23	55.74	68.78	22.53	25.08	9	9	9	10	-12.56	-.11	9.22	8.2	36	34.85	45.8	27.69	18	19	-6.33	8.68	34.97	36.28	0	0
Anzug	11	10	12	10	82.82	91.6	94.33	93.6	16.82	6.47	5.88	6.74	21	22	87	94	13.43	6.14	10	8	8	11	15.3	25.88	30.25	27.73	40.64	31.22	28.2	21.7	18	19	20	28.79	36.12	23.93	0	0
Apfel	10	10	12	11	94	97.6	97.17	92.45	6.39	3.6	3.51	9.65	20	23	95.8	94.91	5.38	7.37	8	10	9	10	18	27.9	58.89	76.2	27.76	28.2	32.37	17.75	18	19	23.5	68	27.64	26.5	0	0
Apfelbaum	11	9	11	12	88.09	88.67	98.27	92.58	12.24	14.04	2.87	7.89	20	23	88.35	95.3	12.73	6.58	9	9	10	9	40.44	56.78	50.3	51.11	14.98	37.79	26.99	23.55	18	19	48.61	50.68	29.13	24.72	0	0
Apparat	11	9	12	11	44.45	49.11	74.75	76.36	20.73	27.99	20.18	25.07	20	23	46.55	75.52	23.7	22.14	8	10	8	11	6	-3	14.63	2.91	22.21	14.87	27.23	22.58	18	19	1	7.84	18.48	24.64	0	0
Aquarell	11	8	12	11	54.73	67.13	89.67	88.73	33.73	22.02	16.3	13.54	19	23	59.95	89.22	29.33	14.71	10	8	9	10	23.9	43.25	44.44	59.8	19.01	31.84	32.46	21.38	18	19	32.5	52.53	26.58	27.55	0	0
Araber	9	11	12	11	78.67	56.64	80.33	76.45	14.21	22.82	24.63	26.49	20	23	66.55	78.48	22.04	25.02	8	10	9	9	-25.63	-7.2	-22.56	-19.33	43.56	30.22	45.09	42.47	18	18	-15.39	-20.94	36.79	42.53	0	0
Arbeit	10	8	13	9	41.4	33.38	62.15	66.89	31.99	21.29	34.24	27.83	18	22	37.83	64.09	27.3	31.15	10	8	9	10	-19.6	3.38	32.78	53.8	41.67	24.8	45.75	29.39	18	19	-9.39	43.84	36.2	38.45	0	0
Arbeiter	10	11	14	9	60.1	56.18	80.43	76.67	26.72	20.52	26.26	29.24	21	23	58.05	78.96	23.15	26.87	9	9	8	11	11.67	-1.33	14.63	33.36	18.47	21.37	22.77	32.05	18	19	5.17	25.47	20.5	29.37	0	0
Arena	11	10	12	11	71.45	70.6	75.92	83.64	26.49	15.85	19.36	13.96	21	23	71.05	79.61	21.55	17.08	8	10	10	9	10.63	17.7	13.5	26.33	50.04	26.82	30.04	24.69	18	19	14.56	19.58	37.75	27.67	0	0
Ärger	12	7	11	11	35.42	32.57	28.36	34	21.29	29.82	20.14	32.7	19	22	34.37	31.18	23.98	26.66	9	9	10	9	-54.89	-57.33	-45.6	-67.44	34.75	30.06	27.79	20.37	18	19	-56.11	-55.95	31.55	26.38	0	0
Argument	11	10	13	9	12.55	11	26.15	29.44	18.07	15.33	23.13	24.62	21	22	11.81	27.5	16.42	23.23	8	10	11	8	15.75	13.4	20.82	18.13	19.42	35.99	16.35	16.57	18	19	14.44	19.68	29.03	16.04	0	0
Arm	12	9	11	11	83.83	92.33	84.18	82.36	17.43	9.21	27.48	27.69	21	22	87.48	83.27	14.82	26.94	8	10	9	10	15.75	10.1	27	28.3	27.22	32.85	33.71	22.81	18	19	12.61	27.68	29.75	27.67	0	0
Armband	12	8	12	11	76.08	92.63	93.42	92.91	22.16	8.62	8.9	7.23	20	23	82.7	93.17	19.51	7.96	10	8	10	9	5	34.5	32.4	32.11	24.66	33.7	28.24	25.56	18	19	18.11	32.26	31.89	26.25	0	0
Armbanduhr	10	11	12	11	94	88	98.42	95.45	10.04	14.09	4.62	4.41	21	23	90.86	97	12.41	4.67	8	10	9	10	11.5	2.4	51.56	43.3	22.58	17.13	25.18	26.37	18	19	6.44	47.21	19.67	25.44	0	0
Armee	10	10	13	10	73.3	69.1	78.23	81.4	24.18	17.61	22.07	19.19	20	23	71.2	79.61	20.7	20.47	8	10	9	10	-34.25	-58.4	-23.89	-56.6	33.53	39.68	60.09	37.85	18	19	-47.67	-41.11	38.06	51.02	0	0
Ärmel	10	11	14	8	69.4	85.55	92.36	83.5	26.1	10.92	9.75	28.85	21	22	77.86	89.14	20.84	18.85	8	10	8	12	2.63	10.4	12.88	22.25	13.21	17.4	16.74	19.64	18	20	6.94	18.5	15.75	18.68	0	0
Armut	11	8	12	10	41.55	25.5	57.42	64.3	31.02	21.14	32.54	31.46	19	22	34.79	60.55	27.83	31.48	8	10	9	10	-63	-58	-69.89	-69.1	29.64	36.72	27.67	22.64	18	19	-60.22	-69.47	32.89	24.43	0	0
Arroganz	10	10	11	12	33.6	25.2	30.45	38.83	26.9	25.3	33.95	25.77	20	23	29.4	34.83	25.78	29.57	10	9	8	11	-64.6	-56.44	-51	-64	30.39	44.73	30.05	30.51	19	19	-60.74	-58.53	36.99	30.19	0	0
Art	11	9	12	11	31.64	8.33	45.42	30.27	31.49	8.37	32.82	31.96	20	23	21.15	38.17	26.32	32.6	10	8	10	9	12.5	4.38	11.6	7.11	22.55	12.37	15.87	11.63	18	19	8.89	9.47	18.69	13.83	0	0
Artikel	10	10	10	12	54.9	31.4	37.8	63.92	38.99	27.69	28.45	33.6	20	22	43.15	52.05	35.05	33.4	8	10	9	10	13.63	11.1	6.11	18.7	23.13	19.08	11.07	24.79	18	19	12.22	12.74	20.36	20.09	0	.03
Arzt	10	10	11	11	83.7	73.4	84.36	90	13.28	20.61	25.38	8.56	20	22	78.55	87.18	17.68	18.7	9	10	8	11	10.89	-19.9	22.13	25.09	44.9	44.99	45.09	40.74	19	19	-5.32	23.84	46.45	41.41	0	0
Asche	8	12	12	11	79.75	83.33	79.5	78.91	14.83	14.2	26.51	24.21	20	23	81.9	79.22	14.18	24.86	9	9	8	11	-30	-40.33	-30.25	-27.55	31.02	30.32	28.62	27.01	18	19	-35.17	-28.68	30.23	26.94	0	0
Assel	9	12	11	11	88.33	68.17	77.55	74.18	11.16	19.55	31.25	28.84	21	22	76.81	75.86	19.1	29.39	10	8	8	11	-17.9	-15.38	-56.5	-51.64	27.4	23.35	37.45	32.35	18	19	-16.78	-53.68	24.97	33.66	0	0
Ast	9	11	13	10	86.44	90.36	92.62	89.5	15.92	9.72	8.54	11.27	20	23	88.6	91.26	12.67	9.71	8	10	9	10	19.38	25.5	14.22	16.4	23.59	36.45	16.01	23.6	18	19	22.78	15.37	30.7	19.84	0	0
Astronaut	9	11	11	11	86.22	85.91	82.45	77.64	19.86	15.31	22.59	27.06	20	22	86.05	80.05	17.02	24.45	8	10	9	11	31.75	26.2	26	25.64	35.16	33.82	26.38	31.18	18	20	28.67	25.8	33.51	28.37	0	0
Atelier	10	9	11	12	70.6	62	82.09	84	25.89	16.07	17.04	15.69	19	23	66.53	83.09	21.66	16	10	8	10	9	29.7	45.38	18.2	35	29.84	42.82	26.09	22.25	18	19	36.67	26.16	35.92	25.19	0	0
Atem	12	9	11	12	47.75	52.22	49.73	66.08	35.27	29.49	37.2	28.39	21	23	49.67	58.26	32.2	33.19	9	9	9	10	46.89	41.22	38.89	33	26.17	24.37	25.89	25.57	18	19	44.06	35.79	24.7	25.18	0	0
Atlas	11	9	11	11	83.82	79.67	91.91	83.64	15.39	14.58	9.35	22.66	20	22	81.95	87.77	14.78	17.44	8	10	9	10	36.75	23	33.78	35.6	38.31	32.39	30.29	24.85	18	19	29.11	34.74	34.77	26.78	0	0
Aufbau	10	11	12	11	27.9	15.09	44.42	53.27	25.58	15.4	29.24	37.12	21	23	21.19	48.65	21.36	32.78	10	9	8	11	23	17	39.5	30.36	27.17	24.15	26.05	25.02	19	19	20.16	34.21	25.25	25.17	0	0
Aufgabe	10	11	12	11	43.5	29.55	33.5	46.64	34.13	21.44	30.59	27.63	21	23	36.19	39.78	28.37	29.32	10	9	11	8	17.1	3.67	24.09	25	38.49	23.84	27.2	28.17	19	19	10.74	24.47	32.26	26.83	0	0
Aufgang	11	10	12	11	48.27	54.7	67.75	70	37.25	31.74	28.67	26.05	21	23	51.33	68.83	34.03	26.85	9	9	10	9	11.33	22.22	25	22.78	21.15	33.07	28.64	22.92	18	19	16.78	23.95	27.5	25.4	0	0
Aufklärung	11	10	13	10	33.36	21.1	31.08	38.6	27.09	21.22	30.27	30.32	21	23	27.52	34.35	24.68	29.84	9	9	9	10	25.33	16.22	56.33	33.5	28.78	39.9	30.77	33.42	18	19	20.78	44.32	34.08	33.41	0	0
Auflage	11	11	12	11	44.55	35.82	47.42	47.82	35.76	32.03	26.07	34.94	22	23	40.18	47.61	33.42	29.91	9	9	8	11	-3.56	-4.56	4.88	7.45	40.19	13.84	35.03	21.27	18	19	-4.06	6.37	29.16	27.02	0	0
Aufprall	9	11	13	10	62.89	48.09	61.46	67.4	27.85	28.16	32.2	32.06	20	23	54.75	64.04	28.3	31.55	9	9	12	7	-39.22	-48.89	-52.67	-72.57	40.11	20.11	28.66	26.81	18	19	-44.06	-60	31.18	28.96	0	0
Aufstand	11	10	11	11	50.36	34	44.91	46	30.23	23.12	25.06	37.47	21	22	42.57	45.45	27.71	31.11	11	8	10	9	-13.18	-11.5	-34.6	-38.78	57.83	41.84	39.39	34.9	19	19	-12.47	-36.58	50.39	36.36	0	0
Auftakt	13	7	11	12	27.38	20.86	41.27	36.5	25.31	19.83	37.61	36.91	20	23	25.1	38.78	23.22	36.47	9	9	8	11	18.78	19.89	23.63	10.73	24.06	19.57	21.4	20.17	18	19	19.33	16.16	21.29	21.14	0	0
Auftrag	10	9	13	10	26.5	24.89	34.77	45.1	21.72	16.95	31.2	29.99	19	23	25.74	39.26	19.08	30.43	9	9	9	10	4.44	-.44	26.11	15.7	40.54	9.42	19.97	22.44	18	19	2	20.63	28.66	21.39	0	0
Aufwand	11	9	11	12	17.18	10.56	39.64	43.42	22.4	12.21	30.97	36.22	20	23	14.2	41.61	18.4	33.1	8	10	10	9	-27.88	-13.9	-10.7	-2.78	31.24	18.52	20.86	24.73	18	19	-20.11	-6.95	25.19	22.49	0	0
Auge	10	10	12	10	95.1	93.3	98	95	5.72	9.43	3.16	4.85	20	22	94.2	96.64	7.65	4.2	9	9	9	10	19	16.78	39.56	48.8	24.04	21.25	34.54	32.25	18	19	17.89	44.42	22.04	32.75	0	0
Augenarzt	11	10	13	10	64.09	65.1	86.46	82.5	27.26	20.28	15.32	24.29	21	23	64.57	84.74	23.6	19.32	9	10	9	11	-9.44	-2.1	17.78	27.27	28.69	35.8	46.19	39.11	19	20	-5.58	23	31.95	41.55	0	0
Augenblick	10	10	13	10	27.6	23.7	38.54	46.3	35.41	26.64	34.17	36.6	20	23	25.65	41.91	30.56	34.64	9	10	9	10	33.44	46.1	24.78	20	38.98	28.76	32.73	28.19	19	19	40.11	22.26	33.63	29.66	0	0
Augenlid	13	8	12	10	79.62	92.25	88	91.5	17.55	9.71	21.57	14.43	21	22	84.43	89.59	16.04	18.34	9	9	8	11	11.78	12.56	15.75	24.36	13.24	18.37	25.38	28.41	18	19	12.17	20.74	15.54	26.79	0	0
Aula	10	10	12	11	71.8	69.6	81.5	88	27.13	20.65	17.12	14.3	20	23	70.7	84.61	23.49	15.83	10	8	9	10	4.8	16.25	18.56	28.9	15.83	34.85	25.37	21.81	18	19	9.89	24	25.83	23.5	0	0
Ausbildung	10	11	13	9	36.5	27.45	36.85	53.89	28.55	18.1	21	33.28	21	22	31.76	43.82	23.49	27.34	8	10	9	10	14.75	16.3	58.56	58.2	37.67	35.64	33.22	26.94	18	19	15.61	58.37	35.46	29.21	0	0
Ausdruck	9	12	11	11	22.56	29.92	40.91	53.18	24.92	23.56	29.69	36.49	21	22	26.76	47.05	23.82	33.06	11	8	10	9	8.36	2.5	15.4	6.22	17.53	21.02	21.53	25.3	19	19	5.89	11.05	18.75	23.2	0	0
Ausflug	10	10	12	11	48.8	35.3	66.67	62.45	29.13	24.51	22.83	36.2	20	23	42.05	64.65	27.1	29.34	10	9	10	10	35.7	49.11	61	51.2	27.2	42.6	25.24	43.13	19	20	42.05	56.1	34.98	34.76	0	0
Ausgang	11	11	13	9	58.82	52.45	59.15	74.33	30.99	27.41	30.48	25.93	22	22	55.64	65.36	28.73	29.07	9	9	8	11	13.78	6.78	24.75	8	29.17	12.01	28.71	24.82	18	19	10.28	15.05	21.94	27.11	0	0
Ausland	10	11	13	10	46.8	46.45	52.08	62.2	37.87	25.49	36.96	20.43	21	23	46.62	56.48	31.15	30.69	10	9	10	9	35.1	47.33	27.1	26.11	28.05	32.19	24.65	21.39	19	19	40.89	26.63	29.89	22.52	0	0
Ausnahme	10	8	13	10	13.7	15.88	38.38	31.4	13.37	18.19	34.23	30.92	18	23	14.67	35.35	15.24	32.29	11	8	9	10	-5	-2.38	3	2.4	34.06	21.54	27.02	18.09	19	19	-3.89	2.68	28.75	22.09	0	0
Auspuff	10	10	13	10	82.8	89.3	95.69	82	16.14	14.66	6.36	19.64	20	23	86.05	89.74	15.37	15.1	9	9	10	9	-8.78	-32.67	-18.7	-1.78	40.28	17.33	33.18	27.84	18	19	-20.72	-10.68	32.5	31.15	0	0
Ausrottung	11	10	12	11	50.45	26.2	36.5	43	35.33	26.43	31.33	29.8	21	23	38.9	39.61	33.05	30.09	13	13	12	13	-87.15	-97.38	-79.83	-83.69	19.6	4.25	48.51	25.26	26	25	-92.27	-81.84	14.84	37.44	0	0
Ausschluss	10	11	12	11	25	13.73	25.83	25.73	21.44	15.23	21.74	30.03	21	23	19.1	25.78	18.87	25.42	7	11	8	11	-46.29	-37.91	-42.88	-16.82	29.34	27.85	36.35	48.4	18	19	-41.17	-27.79	27.89	44.61	0	0
Auster	11	8	11	12	81.09	86.25	88.09	85.08	17.31	14.22	14.11	23.58	19	23	83.26	86.52	15.87	19.26	12	6	8	11	28.75	-8.5	12.75	16.45	32.8	18.54	34.48	36.71	18	19	16.33	14.89	33.52	34.85	0	0
Auswahl	11	11	11	11	24.45	19.36	44.82	38.27	26.02	15.38	32.64	26.22	22	22	21.91	41.55	21.02	29.08	10	9	10	9	4.8	20.44	19.5	19.44	25.78	31.42	28.47	24.23	19	19	12.21	19.47	28.91	25.81	0	0
Auswertung	9	12	13	9	28.67	25	36.92	40.11	30.43	15.44	30.67	30.49	21	22	26.57	38.23	22.47	29.9	9	9	9	10	-6.44	4.67	5.11	5	18.83	27.3	10.82	14.73	18	19	-.89	5.05	23.46	12.67	0	0
Auto	11	9	13	10	91.91	97.22	98	94.6	9.51	3.87	3.16	6.77	20	23	94.3	96.52	7.83	5.21	9	9	10	9	14.11	11.89	41.1	47.67	47.93	23.51	28.35	26.83	18	19	13	44.21	36.64	27.08	0	0
Autogramm	11	9	12	10	64.45	56.67	75.92	85.5	33.92	20.8	26.77	21.58	20	22	60.95	80.27	28.35	24.47	10	8	10	10	4.8	26.75	10.8	23.6	27.03	20.24	22.71	27.68	18	20	14.56	17.2	26.11	25.5	0	0
Automat	10	10	13	10	82.7	72.8	88	73.4	21.78	19.46	16.47	25.22	20	23	77.75	81.65	20.73	21.52	8	10	9	11	13.75	-4.3	12.78	12.45	39.29	27.76	20.95	20.22	18	20	3.72	12.6	33.6	20	0	0
Axt	10	10	12	11	89.7	95.7	96.67	87.55	15.2	5.38	3.45	14.42	20	23	92.7	92.3	11.51	11.05	10	8	11	8	-22.6	-47	-.64	-20.63	34.27	28.44	35.1	34.08	18	19	-33.44	-9.05	33.32	35.2	0	0
Baby	11	11	11	12	93.55	94.27	98	93.92	5.68	6.21	3.61	7.08	22	23	93.91	95.87	5.82	5.94	10	9	9	9	48.8	40.56	48.89	82.33	38.74	40.2	38.06	16.12	19	18	44.89	65.61	38.56	33.17	0	0
Bach	10	9	12	10	85.2	80.89	90.25	87	14.91	13.43	14.52	13.96	19	22	83.16	88.77	14.01	14.02	10	8	9	10	46.4	52.75	44.89	45.3	28.66	29.43	29.82	22.9	18	19	49.22	45.11	28.32	25.64	0	0
Backblech	10	11	13	10	84.2	82.64	88.85	87.1	16.81	14.81	21.4	22.27	21	23	83.38	88.09	15.41	21.29	9	9	7	12	26.44	22.78	30.43	31.17	21.21	26.85	27.42	31.14	18	19	24.61	30.89	23.55	29.04	0	0
Bäcker	11	10	13	10	75.18	73.2	89.69	87.9	18.33	25.23	16.75	21.88	21	23	74.24	88.91	21.34	18.7	9	10	8	11	20.44	48.4	46.88	36.73	14.17	32.01	20.41	31.64	19	19	35.16	41	28.41	27.29	0	0
Bäckerei	11	10	12	11	69.73	84	96.67	91	23.52	9.81	6.04	10.1	21	23	76.52	93.96	19.32	8.54	9	9	9	10	16.22	36.44	47.44	35.4	9.56	27.55	28.5	28.18	18	19	26.33	41.11	22.55	28.22	0	0
Backofen	10	11	12	11	84.4	88.73	88.75	86.91	15.99	11.63	14.96	14.82	21	23	86.67	87.87	13.69	14.58	9	10	9	10	29.67	24.8	37.22	33.4	33.13	34.22	22.28	26.63	19	19	27.11	35.21	32.86	24.06	0	0
Bad	10	10	11	12	83	79.5	90.55	91.25	17.13	13.72	11.17	10.06	20	23	81.25	90.91	15.21	10.37	10	8	10	9	37.9	51.5	45.7	66.44	29.13	37.02	28.25	24.84	18	19	43.94	55.53	32.59	28.04	0	0
Bagger	11	9	13	10	89.36	87.44	93	86.1	13.18	12.45	10.11	15.98	20	23	88.5	90	12.56	13.13	9	9	9	10	7.44	-6.22	5	1.7	29.5	13.09	28.95	11.91	18	19	.61	3.26	23.23	21.13	0	0
Bahnhof	9	11	10	13	76.89	80.36	95.5	91.08	32.56	13.49	6.19	11.27	20	23	78.8	93	23.35	9.48	7	12	11	8	34.43	11.17	36.18	26.88	36.07	32.34	32.36	38.68	19	19	19.74	32.26	34.73	34.43	0	0
Bahre	9	9	13	9	74.67	69.33	86.54	73.67	25.28	23.78	17.34	30.85	18	22	72	81.27	23.97	24	10	8	8	11	-33.5	-27	-54.88	-75.64	31.9	39.84	38.32	20.6	18	19	-30.61	-66.89	34.69	30.29	.04	0
Balken	10	10	12	11	79.9	88	88.42	81.73	18.59	10.64	18.87	26.51	20	23	83.95	85.22	15.32	22.56	10	8	9	10	4.5	1.38	16.78	16.8	21.31	8.02	25.5	25.62	18	19	3.11	16.79	16.42	24.85	0	0
Balkon	12	7	12	10	85.25	93.71	96.08	91.3	14.14	6.16	4.34	7.1	19	22	88.37	93.91	12.35	6.12	8	10	9	10	40.38	33.5	42.78	53.5	24.69	29.31	31.1	29.29	18	19	36.56	48.42	26.8	29.81	0	0
Ball	10	10	13	10	89.1	95.1	97.31	91.1	17.09	4.84	3.71	9.73	20	23	92.1	94.61	12.61	7.49	11	8	9	10	36	36.5	30.56	48.3	28.98	37.44	29.06	31.12	19	19	36.21	39.89	31.81	30.7	0	0
Ballon	9	11	12	11	87.67	90.09	94.5	92.91	11.86	7.92	7.08	9.25	20	23	89	93.74	9.68	8.04	9	10	8	11	22.44	41.9	26	30.55	25.25	35.46	28.75	38.83	19	19	32.68	28.63	31.81	34.12	0	0
Bambus	11	10	11	12	86.09	86.5	84.36	84.5	13.02	20.23	15.13	12.3	21	23	86.29	84.43	16.4	13.41	10	8	8	11	31.1	40.13	38.63	25.36	27.5	41	41.06	23.53	18	19	35.11	30.95	33.37	31.76	0	0
Banane	12	9	11	12	93.42	97.56	97.73	95.25	11.61	3.17	2.57	4.86	21	23	95.19	96.43	9.09	4.05	10	8	11	8	40.8	49.25	47.73	44.75	17.36	31.84	22.9	36.34	18	19	44.56	46.47	24.41	28.41	0	0
Band	10	10	13	10	81.8	68.6	74.85	77.8	22.63	23.54	24.82	20.48	20	23	75.2	76.13	23.47	22.58	10	9	9	10	17.5	18.33	12.22	13.9	35.9	24.83	15.59	18.21	19	19	17.89	13.11	30.31	16.57	0	0
Bande	12	8	13	10	55.83	52	68.62	66	20.86	18.51	29.38	27.25	20	23	54.3	67.48	19.54	27.87	11	8	10	10	-16.18	-22	-59.5	-54.5	31.34	27	28.71	33.55	19	20	-18.63	-57	28.94	30.5	0	0
Bank	9	11	12	10	77	92.45	93.75	91.5	27.47	12.3	9.3	9.43	20	22	85.5	92.73	21.44	9.21	10	8	9	10	-7.1	4	16	38.8	34.38	22.9	17.53	33.4	18	19	-2.17	28	29.56	28.83	0	0
Bankier	10	10	13	10	56.4	52.3	57.77	64.7	22.43	23.71	34.85	28.59	20	23	54.35	60.78	22.56	31.77	9	9	9	10	-26.22	-17.22	1.44	11.4	42.63	16.81	27.12	35.15	18	19	-21.72	6.68	31.77	31.16	0	0
Bär	11	9	11	12	93.82	95.22	97.09	90.83	6.98	4.74	3.83	10.74	20	23	94.45	93.83	5.97	8.64	6	5	4	4	31.5	36.4	10.5	20.25	24.63	40.49	53.08	38.84	11	8	33.73	15.38	31.08	43.37	0	0
Bar	10	9	13	10	72.8	81	86.77	86.2	26.94	17.31	20.89	14.82	19	23	76.68	86.52	22.67	18.11	5	4	7	5	21.4	40	22.71	17.6	24.34	27.29	47.76	38.28	9	12	29.67	20.58	25.91	42.24	0	0
Bargeld	9	10	12	11	72.56	72	95.67	89	23.8	20.45	6.84	12.96	19	23	72.26	92.48	21.47	10.55	8	10	9	10	42	41.4	62	55.3	36.36	34.83	27.68	34.01	18	19	41.67	58.47	34.45	30.51	0	0
Barkeeper	10	10	12	11	72.5	73.9	69.67	82.36	24.9	19.28	28.42	18.98	20	23	73.2	75.74	21.69	24.69	9	9	9	10	30.11	28.56	9.89	5.7	27.07	38.72	43.25	26.99	18	19	29.33	7.68	32.42	34.65	0	0
Baron	11	9	11	12	54.64	49.89	52	57.58	22.5	18.82	24.54	21.69	20	23	52.5	54.91	20.53	22.74	9	9	10	9	-20	16.33	-7.6	-2.44	30.5	28.15	15.84	39.04	18	19	-1.83	-5.16	34.06	28.46	0	0
Barren	9	10	12	11	78	77.5	77.33	81.91	25.43	19.53	24.37	18.49	19	23	77.74	79.52	21.87	21.4	9	9	9	10	-.89	12.67	7.56	23.4	38.59	45.32	49.27	26.69	18	19	5.89	15.89	41.42	38.75	0	0
Barsch	10	9	13	10	78.9	67.22	84.46	78.2	20.78	33.42	20.1	19.74	19	23	73.37	81.74	27.35	19.74	8	10	9	11	23.25	12.8	50.11	16.45	17.18	34.36	37.37	37.17	18	20	17.44	31.6	27.84	40.13	0	0
Bart	10	9	15	8	90.5	85	94.27	81.5	8.51	14.04	5.36	22.39	19	23	87.89	89.83	11.48	14.71	9	10	9	10	19.89	9.8	-1.22	4.4	35.76	32.54	46.24	28.94	19	19	14.58	1.74	33.54	37.11	0	0
Basketball	10	10	11	11	88.6	92.5	79.91	84.45	20.49	7.92	30.76	16.63	20	22	90.55	82.18	15.25	24.24	10	9	9	10	18	28.89	30	35.8	36.73	33.35	26.73	28.87	19	19	23.16	33.05	34.64	27.26	0	0
Bass	10	10	13	10	85.7	76.2	65.23	77.9	15.3	21.59	36.5	19.17	20	23	80.95	70.74	18.85	30.3	9	10	9	10	38.89	16.4	42.56	31.6	25.39	31.42	29.37	30.98	19	19	27.05	36.79	30.22	29.92	0	0
Batterie	10	9	10	13	88.1	90	90.7	81.15	16.33	14.54	15.09	22.82	19	23	89	85.3	15.11	20.01	9	9	9	10	9.33	5	12.78	19.4	36.63	13.77	11.08	25.95	18	19	7.17	16.26	26.94	20.07	0	0
Bauch	11	9	13	10	83.91	89.78	89.38	86.2	18.58	9.34	9.82	13.79	20	23	86.55	88	15.08	11.53	10	9	9	10	38	22.22	-7.44	10	43.42	56.24	29.37	26.03	19	19	30.53	1.74	49.13	28.33	0	0
Bauer	11	8	11	11	74.45	65.63	86.45	84.91	20.84	18.55	13.49	25.15	19	22	70.74	85.68	19.88	19.71	9	9	9	9	32.11	25.11	58.89	24.11	30.65	22.69	28.23	13.77	18	18	28.61	41.5	26.41	28.01	0	.04
Bauernhaus	10	8	12	11	80.1	76.88	93.75	91.73	23.14	19.33	7.78	6.97	18	23	78.67	92.78	20.98	7.31	9	9	10	9	36.11	42.56	52.5	41.56	21.39	40.02	32.65	28.19	18	19	39.33	47.32	31.3	30.29	0	0
Bauernhof	10	9	11	12	73.8	88.56	93.82	90.33	22.35	9.5	5	8.77	19	23	80.79	92	18.63	7.28	9	10	9	11	32.78	34.6	54.89	51.09	23.79	34.63	27.19	18.77	19	20	33.74	52.8	29.19	22.37	0	0
Bauklotz	10	10	12	11	75.5	81.4	76.58	73.45	18.86	15.23	29.55	26.17	20	23	78.45	75.09	16.96	27.4	9	9	10	9	7.33	19.22	15.8	25.11	32.28	32.83	11.27	27.24	18	19	13.28	20.21	32.17	20.4	0	0
Baum	10	10	13	10	88.4	95.2	96.38	96.9	16.01	8.23	5.62	3.51	20	23	91.8	96.61	12.87	4.73	10	8	9	11	51.2	53.13	62.89	60.27	28.1	37.79	33.06	18.17	18	20	52.06	61.45	31.73	25.21	0	0
Baumwipfel	11	9	11	11	82.36	87.33	88.55	91.45	14.51	7.58	16.13	10.84	20	22	84.6	90	11.89	13.49	10	8	10	9	37.2	31.63	51.3	39.56	23.5	41.19	34.9	28.17	18	19	34.72	45.74	31.61	31.59	0	0
Baumwolle	8	12	13	10	69.13	79.17	84.54	82.2	23.76	22.95	22.42	16.21	20	23	75.15	83.52	23.2	19.57	7	11	9	10	33.14	35.73	16	41.5	19.11	26.07	11.92	25.29	18	19	34.72	29.42	23.03	23.54	0	0
Beamter	12	7	10	12	53.42	55	71.5	59.92	32.17	22.99	30.22	33.7	19	22	54	65.18	28.45	31.95	9	10	9	10	-28.67	-24.8	-27.33	7.5	39.3	30.04	37.27	43.36	19	19	-26.63	-9	33.79	43.32	0	0
Becher	11	8	10	12	81.91	94.88	88.1	92.67	16.11	5.51	21.08	6.21	19	22	87.37	90.59	14.12	14.7	10	9	8	11	12.4	8.22	20.88	23.64	15.89	17.1	13.88	21.37	19	19	10.42	22.47	16.15	18.19	0	0
Becken	9	11	12	10	77	77.91	75.58	88.4	16.9	19.97	21.36	12.99	20	22	77.5	81.41	18.18	18.82	11	8	9	10	24.18	10.25	6.78	6.4	25.51	19.11	20.96	17.81	19	19	18.32	6.58	23.53	18.81	0	0
Bedarf	10	8	13	10	16.6	8.75	32.85	39.2	14.27	8.19	32.36	25.76	18	23	13.11	35.61	12.31	29.21	9	10	10	9	-23.11	1.2	3.1	6.44	23.06	7.08	35.15	10.11	19	19	-10.32	4.68	20.42	25.81	0	0
Bedeutung	9	12	11	11	12	7.42	34.91	35.18	11.17	10.32	32.93	22.47	21	22	9.38	35.05	10.67	27.51	10	8	9	10	21.8	23.13	9.56	8.6	27.07	21.88	12.57	12.67	18	19	22.39	9.05	24.2	12.28	0	0
Bedingung	11	9	13	10	15.55	9.33	31.46	33.6	15.74	15.37	34.23	27.82	20	23	12.75	32.39	15.49	30.94	10	8	10	9	-26.8	-20.88	-14.8	.22	35.47	21.51	46.04	18.23	18	19	-24.17	-7.68	29.42	35.6	0	0
Bedrohung	10	10	12	11	18.7	25.9	53.08	39.73	18.07	20.93	20.94	27.66	20	23	22.3	46.7	19.38	24.77	13	13	12	13	-64.85	-82.92	-73.67	-88.54	18.92	17.19	52.84	15.38	26	25	-73.88	-81.4	19.97	38.15	0	0
Bedürfnis	10	10	11	12	23.8	21.9	31.27	36.83	21.18	17.6	33	34.57	20	23	22.85	34.17	18.98	33.18	8	10	10	9	-7.38	-2.9	17.2	-2.56	29.42	35.28	32.28	41.73	18	19	-4.89	7.84	31.95	37.39	0	0
Beere	11	8	12	11	85.82	80.13	93.42	88.64	14.38	15.93	9.21	13.95	19	23	83.42	91.13	14.9	11.7	10	8	9	9	29.6	55.38	52.89	55.22	25.73	38	28.96	20.54	18	18	41.06	54.06	33.45	24.38	0	0
Befehl	10	9	12	10	32.1	27.22	35.42	45.2	35.11	21.64	30.35	38.54	19	22	29.79	39.86	28.83	33.82	10	9	7	12	-48.9	-64.44	-41.43	-28.92	27.06	34.85	21.49	36.85	19	19	-56.26	-33.53	31.14	31.97	0	0
Begabung	11	10	11	12	35.27	30.4	34.36	39.08	29.5	22.21	32.82	30.16	21	23	32.95	36.83	25.76	30.83	9	10	9	10	39.22	48.7	61.89	35.8	28.5	46.08	29.47	64.18	19	19	44.21	48.16	38.03	51.23	0	0
Begegnung	12	9	12	10	41.75	33.33	50.83	51.7	35.61	26.14	29.61	26.57	21	22	38.14	51.23	31.45	27.6	7	11	10	9	43	34.09	28.6	34.11	15.96	26.91	25.31	34.59	18	19	37.56	31.21	23.14	29.33	0	0
Begriff	11	11	12	10	16	13.73	30.83	30.9	26.1	14.96	34.86	24.27	22	22	14.86	30.86	20.79	29.82	9	9	8	11	8.89	2	4.38	12	16.7	4.47	8.37	17.65	18	19	5.44	8.79	12.38	14.67	0	0
Begrüßung	9	10	13	9	45.78	42.3	57.62	61.78	29.38	25.02	34.15	26.16	19	22	43.95	59.32	26.46	30.52	9	9	9	10	40.78	33.78	30.56	40.9	25.52	22.49	27.57	31.91	18	19	37.28	36	23.61	29.59	0	0
Beil	9	12	12	11	84.11	90.83	98.5	91.27	16.26	9.83	3	13.04	21	23	87.95	95.04	13.06	9.77	9	10	9	10	-19.56	-35.6	-5.78	-28.2	20.4	26.44	26.81	34.84	19	19	-28	-17.58	24.54	32.54	0	0
Bein	10	10	11	12	90.3	91.6	96.45	90.08	12.8	15.19	5.8	17.25	20	23	90.95	93.13	13.69	13.22	9	9	9	10	9.11	6.33	39.67	37.2	11.84	33.19	39.28	34.27	18	19	7.72	38.37	24.21	35.7	0	0
Beispiel	11	9	11	12	8.55	12.89	32.55	46.42	10.19	11.32	34.47	24.99	20	23	10.5	39.78	10.65	30.05	9	9	9	10	7.33	3	19.44	27.8	21.67	14.1	20.8	28.75	18	19	5.17	23.84	17.87	24.98	0	0
Beitrag	9	11	11	12	35.44	23.91	34.73	48.75	29.37	17.25	25.3	32.92	20	23	29.1	42.04	23.55	29.73	9	10	10	9	5.89	9.2	-2	10.56	31.75	27.73	36.48	19.95	19	19	7.63	3.95	28.9	29.73	0	0
Bekenntnis	12	9	12	11	19.17	10.33	42.42	29.82	19.31	9.58	34.79	28.86	21	23	15.38	36.39	16.18	32.02	10	8	7	12	-.5	-3.25	24.29	18.75	33.79	25.69	22.82	22.84	18	19	-1.72	20.79	29.63	22.36	0	0
Belang	14	15	15	16	15.21	16.73	28.33	37.38	15.33	17.58	28.01	29.33	29	31	16	33	16.26	28.59	8	10	9	10	-8.63	4	8.67	1.9	16.1	17.15	14.23	6.06	18	19	-1.61	5.11	17.44	10.97	0	.03
Bengel	12	9	11	12	56.5	56.89	62.64	70	25.01	9.89	34.69	32.58	21	23	56.67	66.48	19.58	33.04	12	7	8	11	-11.92	5.14	-7.63	-8.09	23.74	24.67	33.35	33.95	19	19	-5.63	-7.89	24.87	32.76	0	0
Benutzung	9	10	12	11	17.89	17.6	31.08	43.73	27.39	18.8	32.11	32.32	19	23	17.74	37.13	22.59	32.13	8	10	8	11	-8.5	1.5	5.5	3.91	27.21	7.93	20.66	35.84	18	19	-2.94	4.58	19.09	29.67	0	0
Benzin	10	11	11	11	81.4	65.55	79.91	83	19.59	21.98	29.1	21.85	21	22	73.1	81.45	21.91	25.16	10	9	11	9	-3.5	-20	13.82	-5.89	38.61	19	59.06	30.91	19	20	-11.32	4.95	31.26	48.36	0	0
Beratung	11	10	12	11	30.09	26	46.42	43.18	28	18.36	28.54	29.65	21	23	28.14	44.87	23.41	28.45	9	10	9	10	25.11	20.2	24.33	39.1	31.75	31.9	31.14	27.55	19	19	22.53	32.11	31.04	29.46	0	0
Bereich	11	10	10	13	29	23.8	37.5	35.69	22.79	17.12	33.32	33.68	21	23	26.52	36.48	19.97	32.76	8	10	10	9	-6.5	8.5	4.5	4.33	14.42	18.17	9.73	5.55	18	19	1.83	4.42	17.87	7.81	0	0
Berg	9	11	12	11	87.56	93.64	97.83	88	17.01	5.48	2.66	14.11	20	23	90.9	93.13	12.13	10.92	10	9	8	11	37	37.22	36.5	25.36	37.61	33.5	32.57	51.15	19	19	37.11	30.05	34.73	43.56	0	0
Bericht	10	9	12	11	45.2	41.56	52.5	65.09	29.98	27.52	32.32	33.72	19	23	43.47	58.52	28.1	32.87	10	8	9	10	5.9	4.5	5.78	19.7	27.68	20.7	13.06	29.7	18	19	5.28	13.11	24.14	23.83	0	0
Beruf	9	11	13	10	36.56	33.09	51.31	56	23.57	17.71	34.46	27.64	20	23	34.65	53.35	20.05	31.08	11	8	9	10	18	16.75	53	57.2	28.09	27.08	31.46	30.6	19	19	17.47	55.21	26.9	30.21	0	0
Berührung	7	12	12	11	51.29	48.75	48.67	80.73	43.13	30.23	33.09	18.3	19	23	49.68	64	34.36	31.11	11	8	9	10	70.73	56.25	18.89	28.5	20.45	36.56	22.54	35.27	19	19	64.63	23.95	28.39	29.53	0	0
Bescheid	10	10	11	11	30.7	21.8	33.09	42.55	16.14	18.89	22.68	33.06	20	22	26.25	37.82	17.7	28.08	9	9	10	10	-14.56	-12.22	2.9	-3.8	31.74	32.15	26.3	26.49	18	20	-13.39	-.45	31.01	25.92	0	0
Beschluss	10	10	11	12	28.4	19.5	40.27	33.42	28.17	18.34	29.57	25.19	20	23	23.95	36.7	23.59	26.96	7	11	9	11	-5.71	6.55	4.11	3.09	27.32	26.08	8.37	23.35	18	20	1.78	3.55	26.48	17.8	0	0
Besen	10	11	12	11	92.4	95.18	96.42	89.82	7.68	4.29	4.72	19.29	21	23	93.86	93.26	6.14	13.84	10	9	8	11	-.6	-1.11	10.75	13.55	27.65	22.64	19.36	24.04	19	19	-.84	12.37	24.7	21.65	0	0
Besitz	9	10	13	10	33.33	29.6	50.85	66.5	27.68	20.42	29.26	31.23	19	23	31.37	57.65	23.51	30.48	10	9	10	9	-6.3	14	44.3	31.11	45.96	19.24	37.01	24.42	19	19	3.32	38.05	36.46	31.56	0	0
Bestand	10	11	12	11	24.1	16.27	48.08	38.64	17.65	11.7	29.84	34.97	21	23	20	43.57	14.99	32.01	10	8	9	10	6.4	8.88	12.11	14.2	17.95	8.82	12.82	21.5	18	19	7.5	13.21	14.29	17.47	0	0
Besteck	11	9	13	10	82.55	89.89	90.77	90.2	13.38	7.93	14.08	12.41	20	23	85.85	90.52	11.61	13.09	7	11	9	10	7.71	7.36	32.56	25.3	19.52	10.43	30.53	28.45	18	19	7.5	28.74	14.09	28.86	0	0
Bestie	10	8	13	9	66	57.88	70.31	51.78	22.33	28.22	34.82	35.51	18	22	62.39	62.73	24.68	35.5	9	10	8	11	-44.22	-63.9	-69.25	-78.55	34.92	36.03	23.84	16.05	19	19	-54.58	-74.63	35.96	19.66	0	0
Besuch	9	10	12	11	41	34.8	66.58	60.27	23.56	19.15	32.69	29.02	19	23	37.74	63.57	20.98	30.46	9	9	10	9	27.33	60.78	27.9	35.89	34.91	28.43	50.21	40.46	18	19	44.06	31.68	35.36	44.77	0	0
Beton	11	10	12	11	74.18	74.6	83.42	83.27	29.81	17.19	17.63	26.24	21	23	74.38	83.35	24.03	21.64	8	10	10	9	-26.13	-23.5	.8	.78	17.47	21.66	40.61	15.39	18	19	-24.67	.79	19.39	30.49	0	0
Betrag	9	10	13	10	31.22	24.2	40.15	71.3	28.67	19.34	31.15	25.92	19	23	27.53	53.7	23.78	32.46	11	7	8	11	-24.45	1	10.25	11.55	31.05	24.5	28.48	16.99	18	19	-14.56	11	30.69	21.82	0	0
Betrieb	11	8	13	10	47.73	49.38	50.62	73.8	30.6	16.43	28.52	32.22	19	23	48.42	60.7	25.02	31.73	10	9	9	10	1.8	-15.44	9.89	7.3	38.79	13.9	19.32	12.59	19	19	-6.37	8.53	30.27	15.71	0	0
Betrug	12	9	11	12	28.17	12.44	40.91	33.83	24.86	13.13	29.55	33.02	21	23	21.43	37.22	21.74	30.91	8	10	9	11	-63	-51.8	-71.56	-74.82	20.63	22.2	20.58	20.19	18	20	-56.78	-73.35	21.65	19.89	0	0
Bett	10	12	12	11	96.8	96	95.42	93.27	3.12	7.31	4.46	12.41	22	23	96.36	94.39	5.69	9.01	8	10	11	7	70.38	65.9	64.09	64.57	30.44	30.02	25.37	24.33	18	18	67.89	64.28	29.39	24.24	0	0
Bettdecke	9	11	12	11	92	90.36	95.42	91.64	9.26	15.03	6.27	10.79	20	23	91.1	93.61	12.48	8.74	10	9	9	11	57.8	55.78	45.89	42.09	30.87	28.38	25.84	31.99	19	20	56.84	43.8	28.91	28.7	0	0
Bettler	11	9	12	11	75.55	65.33	80.83	84.55	20.52	26.15	20.73	20.16	20	23	70.95	82.61	23.17	20.08	9	9	9	10	-25.56	-42	-40.11	-29.5	17.54	26.23	35.97	27.74	18	19	-33.78	-34.53	23.24	31.45	0	0
Beule	11	10	12	11	79	88	90.17	83.82	13.7	11.52	13.48	21.7	21	23	83.29	87.13	13.22	17.76	8	11	9	11	-41.88	-26.73	-42.56	-43.27	17.3	19.74	35.06	28.34	19	20	-33.11	-42.95	19.8	30.67	0	0
Beutel	9	9	11	12	81.89	87.33	92.73	84.08	18.5	14.12	9.33	20.11	18	23	84.61	88.22	16.21	16.16	11	7	9	10	7.91	2.29	10.56	23.9	6.79	6.5	11.56	28.91	18	19	5.72	17.58	7.07	22.89	0	0
Bewegung	10	9	10	13	53.4	41.11	46.1	76.08	33.73	30.83	25.41	20.1	19	23	47.58	63.04	32.11	26.75	10	8	9	10	51.4	33.13	22.89	57.8	29.76	32.32	24.29	26.36	18	19	43.28	41.26	31.41	30.5	0	0
Beweis	10	10	13	10	27	10.6	39.31	42.3	30.08	11.05	33.08	34.36	20	23	18.8	40.61	23.61	32.9	9	9	9	10	-5.89	2.11	42	37.9	42.62	20.42	31.26	30.88	18	19	-1.89	39.84	32.68	30.26	0	0
Bewertung	9	11	12	10	47.89	27.73	29.83	34.3	38.88	17.99	26.84	32.32	20	22	36.8	31.86	30.21	28.81	9	9	9	10	-12.44	-14.44	11.56	22.6	39.82	20.48	30.1	26.45	18	19	-13.44	17.37	30.74	28.01	0	0
Bewohner	11	8	11	12	44.36	37.63	62.55	65.5	26.67	28.93	35.54	28.22	19	23	41.53	64.09	27.06	31.22	9	9	8	11	16.44	3.78	5.63	22.64	26.59	20.93	13.21	19.82	18	19	10.11	15.47	24.11	18.99	0	0
Beziehung	9	11	12	10	49.33	34.18	25.42	46.8	31.11	22.07	22.37	39.53	20	22	41	35.14	26.9	32.41	9	10	10	9	40.33	63.4	36.3	31.22	38.8	35.26	39.09	27.01	19	19	52.47	33.89	37.82	33.09	0	0
Bezirk	11	10	12	11	48.55	31.7	53.67	61.55	26.42	23.48	32.9	30.37	21	23	40.52	57.43	25.91	31.25	11	7	9	10	3.18	-4.14	4.67	10.1	32.78	18.1	8.22	19.21	18	19	.33	7.53	27.59	14.91	0	0
Bibel	11	11	11	11	74.55	87.55	89.09	91.09	24.25	13.71	15.57	8.92	22	22	81.05	90.09	20.34	12.42	8	10	10	9	-27.38	8	54.9	15.67	46.11	30.4	28.08	38.26	18	19	-7.72	36.32	41.13	38.08	0	0
Biber	9	11	12	11	93.67	88.64	95.17	85.64	6.98	13.49	6.89	17.32	20	23	90.9	90.61	11.08	13.56	10	8	8	11	46.9	33.25	47.75	19.55	37.27	21.16	28.76	30.44	18	19	40.83	31.42	31.12	32.27	0	0
Biene	9	12	12	11	89.33	96.92	97.75	90.18	10.32	4.44	2.63	12.5	21	23	93.67	94.13	8.26	9.45	9	9	10	9	25.44	23.22	38.2	29.11	18.84	48.56	56.08	33.05	18	19	24.33	33.89	35.75	45.6	0	0
Bier	11	9	12	10	88.36	95.22	92.08	80.6	12.17	4.29	13.57	20.21	20	22	91.45	86.86	9.9	17.49	10	8	10	10	34.2	-9.75	26.7	3	62.53	38.51	30.35	46.53	18	20	14.67	14.85	56.44	40.12	0	0
Bikini	11	10	11	12	87.55	94.4	98.09	89.75	14.31	11.96	3.18	12.35	21	23	90.81	93.74	13.38	9.95	8	10	8	11	52	36.8	69.25	33.18	37.59	37.56	29.66	32.29	18	19	43.56	48.37	37.27	35.44	0	0
Bild	14	15	15	17	83.79	89.4	93.07	86.12	14.59	11.19	9.71	14.06	29	32	86.69	89.38	13.02	12.53	13	13	12	13	16.69	36.92	46.92	48.62	20.67	36.22	29.77	34.69	26	25	26.81	47.8	30.68	31.76	0	0
Billard	9	12	12	11	90.11	89.33	85.42	83.36	9.41	10.84	26.14	14.61	21	23	89.67	84.43	10.01	20.97	11	7	8	11	35.55	22.57	4.38	11.36	33.28	29.35	19.96	22.82	18	19	30.5	8.42	31.59	21.38	0	0
Bindfaden	11	10	14	9	75.64	81	93.14	91	22.62	17.08	9.95	7.89	21	23	78.19	92.3	19.87	9.07	8	11	7	12	6.5	-3.45	11.43	10.83	14.31	16.25	19.07	20.51	19	19	.74	11.05	15.87	19.45	0	0
Birke	8	11	12	11	91.25	80.91	96.58	92.36	9.5	16.45	4.36	11.68	19	23	85.26	94.57	14.59	8.73	11	8	8	11	42.18	25.5	53.13	45.64	27.51	31.42	27.24	23.05	19	19	35.16	48.79	29.6	24.46	0	0
Birne	10	10	10	12	92.3	96.5	95.8	93.5	8.01	4.38	5.41	8.86	20	22	94.4	94.55	6.64	7.42	10	9	9	10	21.1	30.22	53.67	48.9	18.06	27.38	31.29	25.09	19	19	25.42	51.16	22.76	27.49	0	0
Bischof	11	9	12	11	69.82	58.56	75	74.64	20.78	23.47	30.91	24.63	20	23	64.75	74.83	22.19	27.45	9	9	9	10	-2.56	-26.22	22.22	2.3	45.65	36.75	24.82	44.19	18	19	-14.39	11.74	42.01	36.81	0	0
Biskuit	10	10	12	11	68.1	78	85.92	89.45	16.6	15.9	15.49	14.17	20	23	73.05	87.61	16.61	14.65	9	9	8	11	10.33	27	44.5	50.45	23.42	25.27	26.3	30.54	18	19	18.67	47.95	25.14	28.21	0	0
Bison	10	11	12	10	85.1	78.09	85.42	81.1	12.41	21.19	21.36	24.11	21	22	81.43	83.45	17.51	22.21	7	11	10	9	42.86	8.55	39.9	20.67	26.54	20.91	33.06	30.19	18	19	21.89	30.79	28.32	32.39	0	0
Bissen	9	10	11	12	37.67	50.8	64.82	74.33	26.01	26.42	34.25	26.52	19	23	44.58	69.78	26.36	30.14	8	9	9	10	-1.75	4.78	12.33	12.7	25.66	9.09	22.37	22.18	17	19	1.71	12.53	18.46	21.64	.07	0
Blase	12	8	10	13	78	79.38	86.6	78.77	17.77	21.94	19.39	22.51	20	23	78.55	82.17	18.99	21.12	9	9	9	10	-19.33	-13.33	-15.33	-7.2	15.59	12.12	18.83	27.35	18	19	-16.33	-11.05	13.89	23.43	0	0
Blässe	11	10	12	10	43.91	67.3	58.42	61.9	31.06	27.98	36.47	33.53	21	22	55.05	60	31.27	34.37	10	8	9	10	-21.5	-21.88	-12.22	-9.7	25.47	25.52	8.39	27.6	18	19	-21.67	-10.89	24.73	20.34	0	0
Blatt	11	10	10	12	76.82	93.2	92	88.58	22.55	8.32	10.3	11.95	21	22	84.62	90.14	18.86	11.1	9	9	11	8	28.11	25	18.09	31	27.31	26.49	26.39	28.92	18	19	26.56	23.53	26.15	27.48	0	0
Blaubeere	10	10	11	12	88.3	87.1	96.36	89.5	10.02	15.1	3.7	10.33	20	23	87.7	92.78	12.49	8.47	8	10	8	11	35.75	42.8	66	62.55	24.42	29.53	20.74	23.32	18	19	39.67	64	26.83	21.74	0	0
Blech	11	9	12	10	77.91	76.78	87.67	82.7	19.27	17.35	15.26	23.13	20	22	77.4	85.41	17.96	18.91	10	8	8	11	9.1	-2.75	9.5	10.09	29.6	16.66	8.59	17.05	18	19	3.83	9.84	24.79	13.79	0	0
Blei	11	11	12	11	64	66	67.42	62.36	32.8	20.46	24.28	34.38	22	23	65	65	26.7	28.96	10	9	8	11	-9.2	-7.67	-9.5	.55	26.32	14.12	34.68	17.95	19	19	-8.47	-3.68	20.87	25.94	0	0
Bleibe	9	10	11	12	38.89	46.1	44.73	63.5	19.51	15.07	29.19	28.04	19	23	42.68	54.52	17.22	29.53	9	10	10	9	20.33	17.6	47.3	41.22	24.56	24.66	38.81	34.5	19	19	18.89	44.42	23.96	35.94	0	0
Bleistift	9	11	12	11	91.56	94.82	96.58	87.73	9.07	5.47	5.42	19.02	20	23	93.35	92.35	7.29	14.12	8	10	9	10	13.88	16.9	19.78	26.7	13.15	23.36	16.28	32.17	18	19	15.56	23.42	19.04	25.45	0	0
Blesse	7	11	11	12	56	47.36	51.91	53.08	32.98	32.74	40.75	40.17	18	23	50.72	52.52	32.14	39.52	7	8	9	9	-5	7.13	0	8.89	41.81	13.59	28.74	22.44	15	18	1.47	4.44	29.68	25.43	.19	.04
Blick	12	7	12	11	52.33	53.29	55.08	48.27	34.19	18.3	35.33	27.4	19	23	52.68	51.83	28.74	31.27	9	9	8	12	37.22	53.67	14.25	21.75	30.49	27.52	16.82	25.99	18	20	45.44	18.75	29.42	22.57	0	0
Blinddarm	10	10	13	10	67.5	56.2	59.77	87.3	33.13	21.26	36.85	14.74	20	23	61.85	71.74	27.7	32	9	10	9	10	-34.56	-27.9	-32	-27.1	31.08	24.57	40.73	26.11	19	19	-31.05	-29.42	27.26	32.93	0	0
Blitz	10	9	11	12	92.5	94.78	93.91	86.83	9.68	7.63	7.85	14.31	19	23	93.58	90.22	8.6	11.98	11	7	9	10	8.45	-20	-37.89	-40.2	47.53	56.65	41.91	40.55	18	19	-2.61	-39.11	51.63	40.05	0	0
Block	11	8	12	10	63.64	76.38	66	69.1	37.41	21.91	19.08	33.24	19	22	69	67.41	31.72	25.82	8	11	8	11	-10.63	-3.27	4.13	17.27	16.98	9.03	7.06	19.19	19	19	-6.37	11.74	13.09	16.38	0	0
Blöße	9	10	12	11	31.89	24.7	51.17	58.82	36.25	21.04	30.3	35.74	19	23	28.11	54.83	28.62	32.48	8	11	10	9	-11.25	-40.18	-19.9	-30.67	29.71	25.38	44.07	25.72	19	19	-28	-25	30.27	36	0	0
Blume	10	10	11	12	87.4	92.2	97.91	91.42	14.31	9.52	3.39	9.71	20	23	89.8	94.52	12.08	7.96	9	9	9	10	60	56.22	68.44	74.6	28.5	35.73	17.95	18.96	18	19	58.11	71.68	31.41	18.25	0	0
Blumenkohl	11	10	12	11	86	91.2	96.83	94	13.41	11.77	4.26	5.44	21	23	88.48	95.48	12.62	4.96	10	9	11	8	22.5	8.89	48	42.75	19.18	29.09	32.39	23.92	19	19	16.05	45.79	24.67	28.5	0	0
Bluse	12	8	13	10	81.33	91	94.85	92.8	14.4	11.99	8.23	7.83	20	23	85.2	93.96	14.02	7.95	9	10	9	10	21.67	16.1	34	36.3	30.83	26.4	26.13	25.76	19	19	18.74	35.21	27.91	25.23	0	0
Blut	11	8	11	12	92.55	95.25	82.82	90.5	7.45	5.82	21.38	10.57	19	23	93.68	86.83	6.77	16.71	8	10	8	11	-36	-43.9	-18.38	1.55	41.28	37.3	25.91	54.39	18	19	-40.39	-6.84	38.13	44.8	0	0
Blüte	8	11	12	11	79	93.18	95.83	88.36	17.57	6.51	5.95	11.78	19	23	87.21	92.26	13.98	9.76	10	9	9	11	68.6	68.78	74	72.73	24.51	28.42	24.67	21.75	19	20	68.68	73.3	25.68	22.49	0	0
Blutegel	10	9	11	12	88.8	84.89	79.55	80.92	10.22	19.34	25.56	18.58	19	23	86.95	80.26	14.92	21.68	10	8	9	10	-47.4	-55.5	-39.67	-29.2	36.18	38.32	33.97	33.09	18	19	-51	-34.16	36.26	33	0	0
Bock	10	10	12	11	70.6	74.8	82.5	68.09	20.33	16.96	19.54	24.91	20	23	72.7	75.61	18.35	22.96	11	8	11	8	12.91	-1	9.73	1.38	22.39	26.68	22.05	35.17	19	19	7.05	6.21	24.6	27.73	0	0
Boden	10	11	13	10	69.3	78.27	66.08	76.7	16.36	22.25	24.59	24.23	21	23	74	70.7	19.72	24.48	10	8	9	9	7.5	1	15.89	6.56	24.11	8	15.62	17.84	18	18	4.61	11.22	18.58	16.96	0	0
Bogen	9	11	13	9	75.11	82.91	92.69	59.89	19.42	13.74	9.04	38.27	20	22	79.4	79.27	16.55	29.62	9	9	9	10	-1.44	13.33	5.22	18.9	20.31	17.14	12.42	21.5	18	19	5.94	12.42	19.75	18.68	0	0
Bohne	12	8	10	12	81.83	87.38	96.7	87.25	23.57	12.44	4.27	13.71	20	22	84.05	91.55	19.66	11.38	8	10	8	11	22.88	10.9	37.13	29.45	18.83	33.34	27.91	23.59	18	19	16.22	32.68	27.78	25.04	0	0
Bohrer	10	10	13	9	80.6	86.9	96.85	84.78	19.06	10.09	4.56	18.57	20	22	83.75	91.91	15.19	13.42	10	8	9	10	-25.5	-29.75	-15.11	6.7	31.41	28.46	44.28	22.65	18	19	-27.39	-3.63	29.33	35.4	0	0
Boje	10	9	12	11	78.3	75.67	88.83	91.45	25.36	30.59	23.75	10.48	19	23	77.05	90.09	27.19	18.27	7	11	10	9	27.29	16.82	22.1	30	37.32	31.75	32.28	24.98	18	19	20.89	25.84	33.35	28.54	0	0
Bombe	11	9	12	11	86.27	89.78	89.17	87.18	14.86	8.63	20.52	10.93	20	23	87.85	88.22	12.28	16.3	9	9	10	9	-58.44	-77.78	-90.5	-93.11	23.96	30.12	13.53	11.42	18	19	-68.11	-91.74	28.22	12.3	0	0
Bonbon	10	10	12	11	83.5	95.5	97.92	89.82	16.24	3.57	3.68	16.49	20	23	89.5	94.04	13	12.14	9	9	7	12	30.11	46.67	54	44.25	31.57	40.13	27.45	39.64	18	19	38.39	47.84	36.05	35.14	0	0
Boot	10	11	12	11	88.7	95.91	97.92	94.27	11.46	5.66	2.71	5.46	21	23	92.48	96.17	9.42	4.55	8	10	10	9	39.25	40.6	49.4	60.56	24.94	35.61	30.06	14.1	18	19	40	54.68	30.46	23.93	0	0
Börse	10	10	12	11	56.4	55.4	73.25	49.64	37.8	23.19	27.5	35.97	20	23	55.9	61.96	30.53	33.34	9	9	9	10	-18.22	-12	-10.44	-.3	46.09	28.81	23.92	37.65	18	19	-15.11	-5.11	37.42	31.47	0	0
Boss	12	8	12	11	50.58	47	71.75	60.36	37.72	25.23	34.13	34.68	20	23	49.15	66.3	32.58	34.1	9	9	8	12	-35.33	-31.56	-9.13	-2.92	38.44	29.6	17.23	50.22	18	20	-33.44	-5.4	33.34	39.74	0	0
Bottich	10	9	12	11	68.2	63.44	93.67	80.45	31.79	27.3	11.4	26.01	19	23	65.95	87.35	29.02	20.45	9	9	7	12	2.78	6	3.86	-4	19.92	18.27	5.64	23.41	18	19	4.39	-1.11	18.62	18.99	.03	0
Bowle	9	12	13	10	77.67	69.58	79.62	79	16.95	23.09	29.15	23.58	21	23	73.05	79.35	20.61	26.29	9	9	8	11	6.11	21.67	20.5	31.55	42.56	40.06	23.25	20.27	18	19	13.89	26.89	40.89	21.67	0	0
Box	8	12	11	12	86.38	75.17	78.73	78.92	16.89	20.41	22.27	19.53	20	23	79.65	78.83	19.45	20.4	9	10	9	10	11.22	2.3	1.56	12.1	33.24	10.25	20.74	12.49	19	19	6.53	7.11	23.76	17.28	0	0
Boxer	10	11	10	12	90.3	87.45	86	88.33	9.81	7.59	15.91	18.46	21	22	88.81	87.27	8.62	16.98	11	8	9	10	12.73	-20.38	-18.56	-27.5	47.74	29.78	39.66	43.52	19	19	-1.21	-23.26	43.51	40.83	0	0
Boykott	11	8	12	11	26.36	18.75	35.5	43.73	19.12	15.95	31.02	28.13	19	23	23.16	39.43	17.81	29.3	8	10	10	9	-14.88	-24.6	-38.6	-40.56	30.24	46.11	37.44	37.86	18	19	-20.28	-39.53	39.08	36.59	0	0
Branche	10	12	12	11	29.4	23.17	50.5	24.82	23.45	26.43	33.22	24.08	22	23	26	38.22	24.73	31.42	9	9	8	11	-2.56	1.56	1.88	14.09	13.38	14.93	4.73	17.3	18	19	-.5	8.95	13.91	14.61	0	0
Braten	11	9	14	10	82.64	87.11	83.57	89.5	17.49	13.94	22.31	13.49	20	24	84.65	86.04	15.75	19.01	8	10	7	12	47.88	35.7	52.71	36.5	19.28	28.39	32.63	36.4	18	19	41.11	42.47	24.87	35.06	0	0
Bratwurst	10	10	13	10	89.6	96.4	94.62	90.9	9.29	4.95	7.87	13.34	20	23	93	93	8.04	10.49	9	9	10	9	17.11	10.56	48.4	27.22	33.45	21.78	25.58	35.02	18	19	13.83	38.37	27.59	31.47	0	0
Brauch	10	11	12	11	32	25.73	40.83	48.73	31.5	23.95	31.18	31	21	23	28.71	44.61	27.27	30.64	9	9	8	11	-1.11	34.22	22.5	34	23.52	38.05	30.03	36.43	18	19	16.56	29.16	35.67	33.5	0	0
Brause	10	9	12	11	80.3	84.44	82.33	89.18	14.93	13.71	20.65	14.72	19	23	82.26	85.61	14.13	17.99	11	7	9	11	9.73	12	35.44	48.82	22.32	42.82	25.45	22.84	18	20	10.61	42.8	30.68	24.37	0	0
Braut	11	9	13	10	79.27	90.78	91.23	88.7	21.65	7.01	11.09	15.45	20	23	84.45	90.13	17.38	12.9	11	7	9	10	54.55	58.86	66.78	58.8	32.09	34.25	23.93	27.87	18	19	56.22	62.58	32.01	25.68	0	0
Bräutigam	9	12	11	12	75.56	83.08	89.09	78.83	17.79	10.6	17.65	25.04	21	23	79.86	83.74	14.25	21.97	9	9	9	10	32.67	32.33	41.89	50.7	28.45	36.9	36.79	31.43	18	19	32.5	46.53	31.96	33.41	0	0
Brautkleid	7	13	13	10	89	91.08	93.23	87.5	14	11.72	10.03	14.46	20	23	90.35	90.74	12.24	12.2	10	8	9	10	37.3	39.63	40.11	52	40.52	46.84	33.52	33.06	18	19	38.33	46.37	42.12	32.91	0	0
Brei	11	8	13	10	67.18	81.13	86	89.5	27.47	12.33	20.93	7.62	19	23	73.05	87.52	22.99	16.3	10	8	11	8	14.2	17.63	24.45	20.38	19.26	17.44	27.78	29.08	18	19	15.72	22.74	18.02	27.6	0	0
Bremse	10	9	12	11	71.9	67.56	59.92	83.73	26.63	23.02	35.52	16.76	19	23	69.84	71.3	24.39	30.11	8	10	9	10	14.88	2.6	26.56	7.6	41.79	42.39	33.59	42.4	18	19	8.06	16.58	41.35	38.67	0	0
Brennholz	11	9	12	11	86.45	83.11	91.5	90.73	10.55	13.02	12.21	10.21	20	23	84.95	91.13	11.53	11.05	8	11	9	10	34.13	20.18	36.22	21.5	27.49	24.19	27.3	27.22	19	19	26.05	28.47	25.86	27.55	0	0
Brett	11	9	11	12	85.45	92.11	97.55	81.08	12.81	7.7	6.92	21.73	20	23	88.45	88.96	11.09	18.13	9	9	10	9	3.78	-.11	8.2	14.33	12.06	13.46	16.7	14.85	18	19	1.83	11.11	12.56	15.73	0	0
Brezel	9	11	12	10	92.11	93.09	91.67	92	7.52	8.63	12.03	8.14	20	22	92.65	91.82	7.96	10.21	8	10	9	10	15.63	41.4	22.44	44.9	26.83	26.24	39.96	30.24	18	19	29.94	34.26	28.89	36.05	0	0
Brief	8	11	13	9	92.88	88.27	92.23	89.56	10.76	10.59	11.8	9.18	19	22	90.21	91.14	10.62	10.65	11	8	9	10	14.91	53.63	22.67	35.1	25.15	38.59	20.19	28.47	19	19	31.21	29.21	36.28	25.04	0	0
Brille	12	9	13	10	91.08	96.22	98.85	94.1	8.55	4.24	2.64	5.45	21	23	93.29	96.78	7.36	4.66	9	9	9	10	-1.44	-13.22	12.33	32.6	17.38	22.03	32.81	36.52	18	19	-7.33	23	20.18	35.41	0	0
Brise	12	8	14	9	46.42	52.5	67.5	63.33	33.73	31.86	31.16	26.56	20	23	48.85	65.87	32.28	28.89	10	9	9	10	29.6	44.56	25.89	31	22.39	30.68	26.84	18.18	19	19	36.68	28.58	26.98	22.19	0	0
Brocken	10	10	14	9	80.2	68.3	81.43	73.56	20.28	14.55	18.83	24.94	20	23	74.25	78.35	18.23	21.24	8	11	9	10	-4.5	-14.36	23.11	19.7	31.01	24.53	37.95	29.19	19	19	-10.21	21.32	27.08	32.7	0	0
Brombeere	10	10	12	11	88.6	94.6	93.83	85.91	16.46	7.07	15.13	17.84	20	23	91.6	90.04	12.71	16.6	10	8	8	11	29.4	45.25	52.38	56.36	20.76	28.99	30.55	26.89	18	19	36.44	54.68	25.3	27.73	0	0
Brosche	11	9	10	13	78.27	87.22	89.8	88.38	17.11	8.29	15.32	9.18	20	23	82.3	89	14.28	11.94	9	10	11	8	6.56	23.5	28.36	50.38	20.88	39.87	28.92	31.61	19	19	15.47	37.63	32.62	31.27	0	0
Broschüre	11	10	12	11	54.09	70.5	86.75	82.82	30.6	24.21	15.35	27.48	21	23	61.9	84.87	28.33	21.57	9	9	10	9	-6.78	9	6.1	35.22	25.41	14.16	25.1	18.19	18	19	1.11	19.89	21.54	26.18	0	0
Brot	10	10	10	12	92.1	92.1	95.8	93.5	10.66	9.11	6.49	7.1	20	22	92.1	94.55	9.65	6.77	8	10	10	10	43.63	22.4	72.4	66.2	27.89	20.91	27.06	31.97	18	20	31.83	69.3	25.88	29	0	0
Brücke	11	8	13	10	91.73	94.63	97.77	92.2	7.13	4.78	2.45	12.66	19	23	92.95	95.35	6.27	8.77	10	9	9	10	18.8	20	33.78	42.1	13.68	42.17	28.96	19.32	19	19	19.37	38.16	29.74	24.04	0	0
Bruder	10	11	13	10	54.3	63.64	58.46	84.3	33.92	26.58	37.66	18.16	21	23	59.19	69.7	29.9	32.86	10	9	9	10	43.7	22.67	58.44	54	32.71	47.41	37.67	34.9	19	19	33.74	56.11	40.62	35.28	0	0
Brühe	10	10	12	11	75.1	77	78.67	84.27	22.22	19.43	27.78	16.46	20	23	76.05	81.35	20.34	22.74	9	9	8	11	17.22	10	28.88	40	23.11	21.16	24.39	28.31	18	19	13.61	35.32	21.82	26.62	0	0
Brunnen	11	9	12	11	89.09	86.67	93.17	82.73	8.95	11.58	8.87	23.63	20	23	88	88.17	10.01	17.93	10	8	10	10	32	45	40.2	34	27.69	32.08	29.91	28.72	18	20	37.78	37.1	29.56	28.71	0	0
Brust	9	11	13	10	91.78	94	96.46	89	11.14	4.34	4.96	22.31	20	23	93	93.22	7.97	15.21	10	8	10	9	49.9	28.13	41.9	22.22	24.78	30	31.89	19.21	18	19	40.22	32.58	28.63	27.83	0	0
Buch	10	10	14	9	86.7	93.5	93.93	91	14.57	8.7	13.72	10.23	20	23	90.1	92.78	12.19	12.31	8	10	8	11	24.38	57	50	79.09	16.79	36.6	30.28	14.81	18	19	42.5	66.84	33.22	26.39	0	0
Buche	10	9	11	11	71.3	78.67	91.82	92.36	30.08	17.75	14.58	11.43	19	22	74.79	92.09	24.63	12.79	9	9	8	11	18.78	28.11	57.5	35.82	24.45	33.27	25.67	27.95	18	19	23.44	44.95	28.73	28.48	0	0
Bücherei	11	9	13	10	74.91	78.11	84.31	76.8	27.32	22.55	18.62	24.39	20	23	76.35	81.04	24.69	21.14	8	10	9	10	28.88	48.3	49.67	60.6	35.12	36.57	32.35	24.34	18	19	39.67	55.42	36.25	28.15	0	0
Buchstabe	10	10	12	11	60.9	71.7	91.5	70.36	33.31	19.71	13.74	33.42	20	23	66.3	81.39	27.21	26.81	8	10	8	11	16.63	9.7	14	26.09	31.78	15.66	27.23	23.9	18	19	12.78	21	23.63	25.36	0	0
Buckel	10	9	13	10	75.7	83.11	82.08	78.8	21.75	13.25	24.57	25.2	19	23	79.21	80.65	18.14	24.33	9	9	9	10	-38.56	-31	-44.22	-30.3	23.44	14.83	29.85	32.43	18	19	-34.78	-36.89	19.42	31.19	0	0
Buddha	11	10	11	12	81	88.4	73.82	79.75	16.72	14.39	23.32	21.04	21	23	84.52	76.91	15.72	21.86	10	8	9	10	26.7	38.25	9.67	23.8	35.82	36.48	43.8	26.47	18	19	31.83	17.11	35.53	35.43	0	0
Bude	10	9	11	10	63.3	62	81.64	78.7	25.7	18.32	19.35	23.62	19	21	62.68	80.24	21.9	20.99	9	9	9	10	21.67	8.11	-14	.2	24.38	42.62	52.9	26.06	18	19	14.89	-6.53	34.39	40.45	0	0
Büffel	11	9	11	12	90.27	85.44	94.64	85.17	11.81	18.25	5.68	15.54	20	23	88.1	89.7	14.82	12.6	9	9	10	9	26.78	15.33	26.6	16	24.96	30.57	32.26	29.95	18	19	21.06	21.58	27.71	30.8	0	0
Bügel	12	8	11	11	79.33	84.75	90.45	89.64	25.99	16.26	15.42	17.18	20	22	81.5	90.05	22.27	15.93	8	11	10	9	-2.13	-2.73	14.7	6.89	18.89	12.19	17.42	10.11	19	19	-2.47	11	14.88	14.6	0	0
Bühne	10	10	11	12	74	84.2	82.27	86.08	29.14	15.36	21.77	14.21	20	23	79.1	84.26	23.27	17.89	9	9	9	9	28	42.11	32.56	38.22	33.31	36.54	20.83	35.03	18	18	35.06	35.39	34.69	28.11	0	0
Bulette	8	11	12	11	87.63	86.82	95	88.36	15.9	14.59	9.95	11.93	19	23	87.16	91.83	14.72	11.21	8	10	8	11	32.63	16.5	54.75	45.82	30.79	20.71	28.92	39.08	18	19	23.67	49.58	26.18	34.56	0	0
Bulldozer	8	12	12	11	86	75.33	89.5	84.18	15.52	17.06	11.49	23.11	20	23	79.6	86.96	16.91	17.78	10	9	10	9	-14.3	-49.11	-14.7	-16.33	21.96	34.72	35.42	34.61	19	19	-30.79	-15.47	33.11	34.06	0	0
Bulle	11	9	13	10	78.09	81.11	89.15	89.2	23.67	19.32	12.29	17.86	20	23	79.45	89.17	21.31	14.59	10	8	8	11	-12.4	-19.38	-25.75	-19.64	44.23	25.22	38.19	41.8	18	19	-15.5	-22.21	36.2	39.34	0	0
Bumerang	11	10	14	9	92.82	88.7	87.57	78.89	8.3	9.35	14.82	23.33	21	23	90.86	84.17	8.84	18.61	10	8	8	11	31.5	44.5	-12.63	-11.91	29.92	39.85	45.28	25.48	18	19	37.28	-12.21	34.24	34.03	0	0
Bündel	9	10	14	9	56.89	70.9	73.14	77.89	29.17	17.14	29.73	19.28	19	23	64.26	75	24.02	25.75	9	9	8	11	1.22	-2.89	5.38	4.36	20.53	14.3	9.83	10.78	18	19	-.83	4.79	17.29	10.12	0	0
Bündnis	9	12	12	11	30.78	21.67	52.92	56.18	26.75	22.77	27.89	34.86	21	23	25.57	54.48	24.35	30.73	9	10	8	11	35.78	13.8	23.5	31.27	26.64	29.46	10.78	31.33	19	19	24.21	28	29.61	24.62	0	0
Bungalow	8	10	13	10	85.5	71.9	93.62	86.6	15.37	25.52	9.07	10.32	18	23	77.94	90.57	22.15	10.05	10	9	9	10	25.1	20	42.67	43.5	26.84	23.74	31.98	29.68	19	19	22.68	43.11	24.85	29.92	0	0
Bunker	10	12	13	10	80.6	72.25	90.54	74.9	24.54	17.94	10.19	24.75	22	23	76.05	83.74	21.09	19.24	9	9	9	10	-43.67	-56.67	-28	-65.6	33.51	38.14	46.18	35.91	18	19	-50.17	-47.79	35.46	44.32	0	0
Burg	10	8	13	10	87.3	93.88	94.92	85	8.62	6.64	8.45	18.28	18	23	90.22	90.61	8.29	14.17	11	7	7	12	37.18	47.29	42.14	26.17	24.66	32.79	32.28	23.82	18	19	41.11	32.05	27.62	27.51	0	0
Bürger	11	9	12	10	45.64	37.56	40.08	62.7	24.84	32.36	31.15	29.97	20	22	42	50.36	27.97	32.03	10	9	9	10	1.1	2.89	14.33	22	13.35	26.83	18.13	21.57	19	19	1.95	18.37	20.24	19.85	0	0
Bürgschaft	11	9	12	11	27.82	21.56	43.5	50.18	28.35	23.45	34.48	37.64	20	23	25	46.7	25.78	35.35	8	10	8	11	-13	-16.2	-2	-16.09	32.63	36.82	49.3	32.46	18	19	-14.78	-10.16	34.04	39.77	0	0
Bürste	10	9	11	12	80.8	91.33	95.27	85	21.08	11.09	8.25	20.83	19	23	85.79	89.91	17.49	16.59	7	12	10	9	8.29	13.25	16.6	22	21.12	11.57	18.56	28.5	19	19	11.42	19.16	15.38	23.26	0	0
Bus	10	9	11	11	87.5	91.33	97.36	91.91	13.75	11.37	3.07	7.91	19	22	89.32	94.64	12.49	6.48	9	9	10	9	7.78	5.22	22.8	18.78	23.48	21.5	25.49	21.53	18	19	6.5	20.89	21.88	23.13	0	0
Busch	11	9	11	12	83.45	91	87.18	81.83	13.91	11.14	14.07	27.43	20	23	86.85	84.39	13	21.76	9	9	9	10	13.11	29.33	25.44	31.8	20.76	42.26	24.49	32.37	18	19	21.22	28.79	33.36	28.31	0	0
Busen	9	12	13	9	88.44	95.33	93.77	87.22	26.81	5.61	9.54	25.38	21	22	92.38	91.09	17.81	17.56	7	11	10	10	69.29	31.36	53.1	30.6	39.94	36.36	38.36	22.1	18	20	46.11	41.85	41.26	32.58	0	0
Büste	11	9	12	11	76.45	78.89	92.25	86.09	18.35	17.68	8.89	22	20	23	77.55	89.3	17.62	16.42	8	10	8	11	7	12	32.25	26.64	19.41	25.15	27.6	20.69	18	19	9.78	29	22.28	23.29	0	0
Butter	11	9	13	10	84.55	94	91.15	94.2	10.46	5.05	10.75	7.15	20	23	88.8	92.48	9.57	9.29	9	9	9	10	10.89	18	53	41.2	38.3	16.76	27.48	29.75	18	19	14.44	46.79	28.91	28.55	0	0
Butterbrot	9	11	14	9	85.78	90.45	93.14	87.89	14.66	6.74	11.2	13.31	20	23	88.35	91.09	10.96	12.06	9	9	9	10	26.33	8	49.67	45.6	24.14	27.38	26.37	27.82	18	19	17.17	47.53	26.75	26.46	0	0
Cafe	11	10	10	13	77.36	83.2	95	88.54	21.19	18.21	7.75	9.82	21	23	80.14	91.35	19.56	9.37	12	7	10	9	29.08	50.71	53.8	64	28.81	47.21	29.93	22.83	19	19	37.05	58.63	36.95	26.59	0	0
Cello	10	11	12	11	82.7	82.36	88.17	92.64	24.85	21.5	18.79	9.01	21	23	82.52	90.3	22.56	14.79	7	11	10	9	52.86	29.73	28.9	46.11	32.05	27.16	27.27	33.9	18	19	38.72	37.05	30.51	30.99	0	0
Chaos	9	10	11	11	58	45.6	48.27	61.82	25.13	32.43	25.65	26.95	19	22	51.47	55.05	29.1	26.59	8	10	8	11	-39.88	-9.5	-51.63	-73.36	44.79	38.33	28.88	20.95	18	19	-23	-64.21	42.96	26.26	0	0
Charme	10	9	12	11	35.3	25.11	51.42	49.27	22.94	24.74	33.57	31.95	19	23	30.47	50.39	23.72	32.07	9	10	10	9	55.67	67	51.9	62	19.98	27.71	22.9	25.25	19	19	61.63	56.68	24.4	23.92	0	0
Chef	11	9	12	10	65	52.11	61.08	75.4	25.59	19.43	27.9	34.46	20	22	59.2	67.59	23.38	31.14	11	8	9	9	-41.27	-13	-8	12.11	32.83	21.36	30.22	32.85	19	18	-29.37	2.06	31.34	32.32	0	0
Chinese	9	11	13	10	85.22	70.09	86.77	85.9	7.93	22.5	17.46	20.16	20	23	76.9	86.39	18.78	18.24	8	10	9	10	8.88	11.6	-.11	19.7	43.1	13.07	20.18	40.7	18	19	10.39	10.32	29.28	33.35	0	0
Chips	9	13	10	11	85	89.38	81.6	80.18	15.75	13.93	20.13	21.04	22	21	87.59	80.86	14.5	20.11	10	9	10	9	22	40.11	6.4	10.22	26.85	40.22	21.49	17.87	19	19	30.58	8.21	34.14	19.41	0	.04
Chirurg	10	11	11	11	75.3	68	83.64	86.27	24.28	16.98	19.11	13.43	21	22	71.48	84.95	20.58	16.17	11	8	8	11	-7.27	-27.25	-7.13	13.36	45.29	37.55	51.89	46	19	19	-15.68	4.74	42.31	48.28	0	0
Chor	10	10	12	11	66.8	79.7	77.83	78.18	27.22	15.29	26.27	25.76	20	23	73.25	78	22.48	25.43	9	10	10	9	22.89	42	50.3	35.33	27.59	34.05	29.15	45.51	19	19	32.95	43.21	31.85	37.48	0	0
Christ	10	10	12	10	40.1	35.7	52.08	55.3	33.89	25.29	32.43	39.32	20	22	37.9	53.55	29.19	34.88	10	9	9	10	4	3.11	59	14.9	40.51	10.12	25.37	32.08	19	19	3.58	35.79	29.43	36.23	0	0
Clown	10	9	15	8	80	96.11	90.53	87.25	19.32	4.51	10.13	15.7	19	23	87.63	89.39	16.25	12.1	8	10	9	10	4	12.8	41.11	40.4	56.26	31.17	23.05	41.91	18	19	8.89	40.74	42.87	33.38	0	0
Code	12	8	12	11	54.08	51.13	43.58	49.55	35.48	28.28	36.27	32.85	20	23	52.9	46.43	32.03	34.02	10	8	9	10	-2.9	4.75	-10.11	3.9	27.89	17.22	33.91	18.5	18	19	.5	-2.74	23.44	27.09	0	0
Comic	10	10	11	12	68.8	77	59.91	66.25	28.09	23.28	35.33	26.06	20	23	72.9	63.22	25.46	30.29	9	9	8	11	29.33	42.22	11.75	25.64	29.37	32.73	16.21	36.76	18	19	35.78	19.79	30.89	30.05	0	0
Computer	10	10	13	10	90.9	96.1	92.69	87	10.64	4.77	17.44	17.44	20	23	93.5	90.22	8.46	17.28	9	9	8	11	31.33	25.33	22.75	28.18	45.2	28.98	40.18	38.27	18	19	28.33	25.89	36.96	38.07	0	0
Container	9	11	13	10	75.67	72.91	90.54	82.4	25.46	21.78	11.1	19.32	20	23	74.15	87	22.9	15.39	9	9	9	10	-9.22	-11.22	6.11	6.9	30.97	23.18	32.84	22.86	18	19	-10.22	6.53	26.56	27.22	0	0
Couch	10	10	13	10	82.9	88.4	95.15	92.2	18.99	14.78	5.4	8.72	20	23	85.65	93.87	16.8	7.01	8	10	8	11	41	37.4	42.63	50.82	24.36	27.98	28.51	28.45	18	19	39	47.37	25.74	27.98	0	0
Creme	10	11	13	10	68.8	83.18	87.31	84.8	24.9	13.72	13.29	16.84	21	23	76.33	86.22	20.67	14.63	10	9	9	10	21	36.56	34.78	41.3	21.54	29.17	27.95	33.11	19	19	28.37	38.21	25.96	30.11	0	0
Dach	10	10	12	11	78.1	92.6	94.5	90.73	28.74	6.88	8.76	12.6	20	23	85.35	92.7	21.66	10.69	11	8	10	9	23.18	20.5	42.3	22.11	25.17	29.58	32.92	27.31	19	19	22.05	32.74	26.34	31.31	0	0
Dachboden	11	9	11	12	74	81	92	89.83	29.8	10.89	13.83	13.58	20	23	77.15	90.87	23.02	13.43	9	9	9	9	30.56	38.11	6.22	8.67	26.13	39.87	23.57	25.14	18	18	34.33	7.44	32.93	23.67	0	0
Dachs	10	10	12	11	89.3	86.4	91.58	89	8.73	17.44	10.2	12.09	20	23	87.85	90.35	13.5	10.97	10	9	9	10	20.8	13.44	43.22	10.4	18.21	19.26	33.92	34.34	19	19	17.32	25.95	18.57	37.21	0	0
Dackel	10	10	13	10	86.1	92.4	94	89.2	15.17	9.12	7.46	13.13	20	23	89.25	91.91	12.6	10.33	10	9	7	12	7.4	11.78	44.86	34.58	28.94	31.41	37.18	30.56	19	19	9.47	38.37	29.36	32.52	0	0
Dahlie	10	8	12	11	54.6	70.63	92.58	85.45	27.98	32.82	9.48	13.13	18	23	61.72	89.17	30.42	11.69	8	9	10	9	30.25	32.78	64.6	55.33	18.03	28.41	21.17	23.65	17	19	31.59	60.21	23.4	22.26	.12	0
Dame	10	9	12	10	64	64.56	88.83	84.9	20.9	23.28	11.34	14.81	19	22	64.26	87.05	21.43	12.86	10	8	10	9	31	38.5	67.7	42.56	26.74	39.59	31.19	36.71	18	19	34.33	55.79	32.23	35.38	0	0
Dämmerung	12	9	13	10	60.58	62.89	75.23	69	27.7	13.74	20.72	30.89	21	23	61.57	72.52	22.34	25.19	10	8	8	11	33.2	13.5	15.63	16.45	44.65	31.46	28.94	32.23	18	19	24.44	16.11	39.56	30.05	0	0
Dampf	12	8	12	11	80.17	83.5	82.83	67.82	14.32	8.85	18.31	28.41	20	23	81.5	75.65	12.26	24.36	10	8	9	11	16.8	2.88	15.56	-8.09	22.98	16.27	47.12	25.41	18	20	10.61	2.55	20.96	37.69	0	0
Dampfer	11	9	12	11	82.91	86.11	95.25	87.09	17.78	12.71	4.73	12.14	20	23	84.35	91.35	15.4	9.78	10	9	8	11	33.6	26.78	41.5	45	20.46	24.1	31.67	26.5	19	19	30.37	43.53	21.9	27.99	0	0
Darbietung	10	11	12	10	41.8	29.73	49.83	55.7	31.72	26.55	33.67	33.58	21	22	35.48	52.5	29.04	32.96	10	8	9	10	9.2	22.5	32.33	31.2	26.15	20.48	26.36	28.05	18	19	15.11	31.74	24.1	26.5	0	0
Darm	10	10	13	10	82.4	74.9	83.38	82.1	16.11	18.39	14.46	24.34	20	23	78.65	82.83	17.26	18.89	9	9	10	9	-20.44	-29	-18.9	-7.22	24.46	23.6	33.8	27.64	18	19	-24.72	-13.37	23.73	30.77	0	0
Dattel	10	10	13	10	77.9	83.1	88.69	89.7	26.38	14.75	15.86	12.18	20	23	80.5	89.13	20.97	14.07	10	8	8	11	14.3	35.13	55.13	42	22.37	32.91	29.23	34.98	18	19	23.56	47.53	28.71	32.5	0	0
Dauer	10	9	11	12	17.4	14.89	22.55	26.75	13.12	17.01	22.17	26.34	19	23	16.21	24.74	14.71	23.98	9	9	8	11	-10.11	-8.89	3.5	8.18	13.68	19.02	18.79	18.77	18	19	-9.5	6.21	16.09	18.4	0	0
Daumen	9	11	12	11	87.33	92.64	96.67	91.18	16.16	11.25	3.45	18.12	20	23	90.25	94.04	13.56	12.77	9	9	10	9	12.11	4	27.7	36.56	9.75	10.78	40.43	31.35	18	19	8.06	31.89	10.81	35.7	0	0
Daune	10	10	12	11	81.7	69.4	75.58	82.55	19.71	23.79	27.65	20.27	20	23	75.55	78.91	22.18	24.12	8	11	9	10	30.5	33.73	35.78	57.3	16.5	31.82	24.74	25.21	19	19	32.37	47.11	25.91	26.68	0	0
Decke	8	13	12	11	87	85.85	92.33	92.45	8.18	17.14	7.41	10.36	21	23	86.29	92.39	14.14	8.73	8	10	9	10	32.5	32.4	30.33	32.8	21.63	31.44	19.35	31.12	18	19	32.44	31.63	26.75	25.53	0	0
Deckel	10	11	14	9	87.1	81.09	89.14	84.22	12.63	12.76	14.21	20.06	21	23	83.95	87.22	12.75	16.48	8	10	9	10	4.88	-.7	17.11	18.7	18.02	13.76	18.59	24.29	18	19	1.78	17.95	15.56	21.2	0	0
Degen	10	10	11	11	79.9	84.9	80	84	25.89	13.55	23.13	19.51	20	22	82.4	82	20.28	20.98	9	10	8	11	3.44	-16.7	-39.38	-22.36	24.5	21.16	34.79	30.94	19	19	-7.16	-29.53	24.44	32.82	0	0
Deich	11	10	12	11	78.91	80.9	89.17	85.18	19.4	18.38	13.37	21.01	21	23	79.86	87.26	18.47	17.15	8	10	10	9	24.75	9.3	43.7	30.33	32.66	16.94	19.09	33.22	18	19	16.17	37.37	25.56	26.82	0	0
Deichsel	10	9	11	12	60.6	59.78	81.27	81.75	33.8	30.86	21.67	21.18	19	23	60.21	81.52	31.54	20.92	10	9	8	11	-.4	.89	12	7.09	7.96	1.69	14.46	17.43	19	19	.21	9.16	5.78	16.01	.03	0
Delphin	10	10	12	11	93.2	96.4	95.58	88.82	9.39	6.02	10.11	13.06	20	23	94.8	92.35	7.85	11.86	7	11	7	12	60.86	58	49.71	48.83	34.89	38.84	30.92	24.54	18	19	59.11	49.16	36.32	26.2	0	0
Denkmal	10	9	10	12	72.4	77	80.1	85.58	24.15	16.97	20.2	17.39	19	22	74.58	83.09	20.62	18.47	9	9	9	10	-.11	11.11	15.56	17.4	38.89	20.69	24.08	17.36	18	19	5.5	16.53	30.76	20.23	0	0
Detektiv	9	11	11	11	60.78	65.64	66.73	72.73	28.15	22.79	28.22	22.12	20	22	63.45	69.73	24.77	24.93	8	10	10	9	8.88	7.2	8	-9.67	18.61	26.13	32.59	37.72	18	19	7.94	-.37	22.47	35.29	0	0
Deutung	10	10	14	9	26.5	14.4	23.14	21.44	28.28	13.89	29.38	31.02	20	23	20.45	22.48	22.56	29.34	10	8	10	9	.4	20.5	3.5	4.67	23.36	27.16	34.17	8.94	18	19	9.33	4.05	26.42	24.89	0	0
Diadem	10	9	13	10	56.2	85.89	72.54	84.9	29.71	14.64	21.19	16.8	19	23	70.26	77.91	27.72	19.99	8	11	8	11	24.13	8.45	43.25	42.91	42.77	31.17	32.15	32.06	19	19	15.05	43.05	36.25	31.2	.03	0
Diamant	12	10	13	10	83.58	92.1	91.31	85.4	22.21	10.03	9.33	13.75	22	23	87.45	88.74	17.9	11.56	8	10	9	10	36.25	41.7	47.67	58.7	33.05	38.17	31.18	36.35	18	19	39.28	53.47	35.05	33.54	0	0
Dichter	10	11	12	11	48.2	46.82	48.5	68.73	34.82	17.88	40.64	28.57	21	23	47.48	58.17	26.57	36.1	8	10	9	10	31.88	51	33.11	28.9	21.54	34.73	22.28	22.34	18	19	42.5	30.89	30.42	21.79	0	0
Dieb	11	10	12	10	47.09	59.5	74.25	60.1	25.43	27.66	32.85	29.43	21	22	53	67.82	26.61	31.44	9	9	9	10	-52.56	-45.44	-80.89	-79.3	30.95	35.14	24.76	12.01	18	19	-49	-80.05	32.33	18.58	0	0
Diebstahl	11	9	13	10	46.64	42.33	48.15	70.2	24.13	29.61	36.3	30.32	20	23	44.7	57.74	26.09	34.92	8	10	11	8	-40	-58.6	-77.36	-85.63	42.63	32.88	19.88	13.18	18	19	-50.33	-80.84	37.56	17.46	0	0
Diener	10	11	13	9	61.6	59.09	73.62	72	30.13	21.15	24.82	24.25	21	22	60.29	72.95	25.18	24.02	10	9	8	11	-27.4	-14.67	-2.13	5.45	36.5	41.17	27.6	23.74	19	19	-21.37	2.26	38.24	24.98	0	0
Dienst	11	10	13	10	39.09	24.5	26.92	59.7	27.64	14.27	26.91	33.77	21	23	32.14	41.17	23.01	33.73	9	9	9	10	-18.11	-12.78	17.33	25	50.33	16.32	27.87	32.42	18	19	-15.44	21.37	36.4	29.77	0	0
Diktat	11	10	9	13	52.27	41.1	46.89	60.62	33.76	25.2	36.93	33.04	21	22	46.95	55	29.81	34.51	10	8	9	10	-24	-21.88	-21.33	13.2	42.14	23.29	32.47	19.8	18	19	-23.06	-3.16	34.13	31.28	0	0
Dirigent	11	11	10	12	77.91	79.82	89.1	84.92	23.06	18.33	13.67	20.08	22	22	78.86	86.82	20.35	17.2	10	8	8	11	17.6	42.63	26.75	49.45	47.39	37.87	27.5	27.57	18	19	28.72	39.89	44.08	29.14	0	0
Diskothek	9	10	12	11	67	76.6	69.75	77.18	25.58	21.25	27.58	20.92	19	23	72.05	73.3	23.26	24.37	9	9	9	10	4.78	1.56	-5.67	4.2	52.62	18.69	24.91	36.98	18	19	3.17	-.47	38.34	31.39	0	0
Disziplin	9	10	10	13	42.22	15.3	35	32.46	31.24	11.56	34.17	23.46	19	23	28.05	33.57	26.29	27.92	9	11	11	9	-11.89	-12	54.82	45.78	53.95	35.44	33.07	31.23	20	20	-11.95	50.75	43.44	31.74	0	0
Diva	10	12	11	11	68	63.17	76	67.91	27.29	31.08	29.52	27.69	22	22	65.36	71.95	28.83	28.23	10	9	10	9	-9.9	-10.89	9.1	-.11	34.33	50.41	38.55	33.8	19	19	-10.37	4.74	41.46	35.68	0	0
Doktor	10	9	12	11	76.5	81.78	71.67	81.09	19.36	16.64	30.43	28.36	19	23	79	76.17	17.83	29.18	9	9	8	11	33.78	-12.44	15.38	14.36	45.59	46.68	36.34	39.81	18	19	10.67	14.79	50.68	37.34	0	0
Dokument	10	10	11	11	56.6	59.3	72.55	73.55	33.79	31.97	25.83	27.65	20	22	57.95	73.05	32.05	26.11	10	9	9	10	2.2	-3	26.22	22.2	28.71	24.48	34.2	30.11	19	19	-.26	24.11	26.19	31.26	0	0
Dollar	11	10	13	10	85.09	78.3	89.92	83.9	11.93	16.91	17.94	19.66	21	23	81.86	87.3	14.56	18.52	11	8	9	10	-11.82	14.13	26.22	31.1	44.83	28.36	49.04	49.1	19	19	-.89	28.79	40.03	47.76	0	0
Dompteur	9	11	13	9	78.33	77.09	77.54	83.22	21.42	19.68	21.26	19.23	20	22	77.65	79.86	19.93	20.19	10	8	9	10	-14.8	15.88	7.56	13.9	33.26	22.18	21.92	20.63	18	19	-1.17	10.89	32.16	20.9	.03	0
Donner	10	10	12	11	72	53.2	43.5	68.73	30.68	34.21	38.41	22.88	20	23	62.6	55.57	33.07	33.79	9	10	9	10	14.33	4.2	-27	-29.8	52.32	49.27	39.65	28.02	19	19	9	-28.47	49.57	33.07	0	0
Doppelbett	11	7	11	12	84.27	84.71	98.09	90.25	16.4	16.07	3.02	12.32	18	23	84.44	94	15.79	9.8	9	10	8	11	47.56	49.6	60	33.55	34.7	34.69	20.72	32.05	19	19	48.63	44.68	33.73	30.29	0	0
Dorf	11	9	13	10	71.73	78.11	93.46	89.1	31.9	21.5	7.5	10.02	20	23	74.6	91.57	27.22	8.75	9	10	8	11	24.33	11.7	44	26.64	28.5	31.74	24.86	35.84	19	19	17.68	33.95	30.11	32.12	0	0
Dorn	8	11	13	10	84.25	83	84.62	81.8	13.35	14.63	21.64	18.34	19	23	83.53	83.39	13.73	19.87	11	8	8	11	-7.27	-31.75	-34.75	-52.09	32.51	21.97	26.16	36.9	19	19	-17.58	-44.79	30.48	33.17	0	0
Dorsch	11	9	12	11	59.73	57.33	83.83	81.45	33.92	33.86	16.07	21.22	20	23	58.65	82.7	33.01	18.31	9	9	9	10	9.44	3.56	48.33	32.9	33.75	10.99	27.24	25.35	18	19	6.5	40.21	24.54	26.72	.07	0
Dose	12	9	12	10	82.75	89	90.42	85.3	23.23	15.6	17.16	22.38	21	22	85.43	88.09	20.1	19.38	9	9	9	10	6.89	3.11	12.89	21.3	23.46	9.89	16.93	24.43	18	19	5	17.32	17.57	21.08	0	0
Drache	10	9	12	11	93.7	91.67	79.42	81.73	6.88	9.04	22.52	27.72	19	23	92.74	80.52	7.82	24.59	11	8	9	10	12	24.25	-26.56	-37.3	43.3	48.3	50.3	35.63	19	19	17.16	-32.21	44.58	42.3	0	0
Draht	9	12	12	11	85.56	81.33	89.83	75.64	11.08	16.44	10.79	30.69	21	23	83.14	83.04	14.22	23.21	9	9	10	9	1.78	-3.44	7.6	-7.56	18.03	30.2	31.46	35.41	18	19	-.83	.42	24.28	33.36	0	0
Drama	10	9	12	11	35.9	43.33	41.08	54.18	19.96	25.1	31.79	34.52	19	23	39.42	47.35	22.22	33.04	8	11	11	8	-3	-8.18	.18	-13.25	45.33	41.82	54.11	41.64	19	19	-6	-5.47	42.16	48.45	0	0
Dramatik	11	10	13	10	19.09	25.1	37.15	40.7	25.94	19.71	33.32	22.44	21	23	21.95	38.7	22.82	28.54	8	10	9	10	2.38	-11.2	-14.78	-12.8	33.02	42.2	36.15	19.75	18	19	-5.17	-13.74	37.95	27.87	0	0
Dreck	11	11	13	10	64.18	77	63.38	72.8	34.31	15.33	33.31	32.54	22	23	70.59	67.48	26.75	32.57	9	9	9	10	-30.33	-40.67	-42.56	-66.6	28.84	32.6	25.85	19.73	18	19	-35.5	-55.21	30.33	25.37	0	0
Dreieck	12	8	12	11	93.58	94.75	97.25	88	11.02	8.7	3.82	16.7	20	23	94.05	92.83	9.93	12.5	9	9	9	10	-1	-1.44	6.33	14	7.42	16.28	10.62	23.4	18	19	-1.22	10.37	12.27	18.42	0	0
Dromedar	9	9	12	11	81.33	81.33	91.83	82.82	20.97	13.38	12.47	20.62	18	23	81.33	87.52	17.06	17.1	9	10	9	10	16	28.9	36.11	28.8	24.68	25.8	35.31	32.8	19	19	22.79	32.26	25.44	33.26	.04	0
Drossel	10	10	13	10	66.4	70.5	96	88.3	27.27	29.33	6.24	11.88	20	23	68.45	92.65	27.65	9.71	10	8	10	9	32.3	12.25	63.2	37.33	32.25	15.42	30.76	21.58	18	19	23.39	50.95	27.45	29.26	0	0
Druck	10	10	12	11	39.1	30.3	56.33	66.73	25.05	20.92	31.51	38.91	20	23	34.7	61.3	22.91	34.82	8	10	8	11	-45.25	-37.7	-38.38	-22.45	16.68	38.74	35.78	29.07	18	19	-41.06	-29.16	30.4	32.13	0	0
Dschungel	10	9	11	11	81.9	86.67	77.55	73	17.79	11.88	24.23	26.84	19	22	84.16	75.27	15.07	25.06	9	9	10	10	20.67	38.33	-21.4	-20.6	46.48	42.9	48.04	38.34	18	20	29.5	-21	44.33	42.3	0	0
Dudelsack	11	10	12	11	91.91	90.5	83.08	87.36	9.78	13.07	23.05	14.12	21	23	91.24	85.13	11.19	19	9	10	11	8	14.11	19.9	35.73	38	45.23	23.24	23.49	33.5	19	19	17.16	36.68	34.47	27.28	0	0
Duft	10	9	12	10	44.4	31.89	42.83	39	42.01	19.76	35.33	34.46	19	22	38.47	41.09	33.12	34.16	9	9	9	10	49.11	60.78	43.78	72.4	28.59	25.29	26.31	20.41	18	19	54.94	58.84	26.86	27.05	0	0
Dummheit	9	11	13	10	23.44	10	26.08	41.1	22.45	14.07	31.42	32.93	20	23	16.05	32.61	19.07	32.25	9	9	9	10	-62.56	-49.89	-38.44	-53.7	24.32	35.01	27.32	31.95	18	19	-56.22	-46.47	29.96	30.06	0	0
Dummkopf	9	10	10	13	30.56	21.2	46.6	59.08	35.07	21.65	37.04	33.21	19	23	25.63	53.65	28.36	34.68	10	9	9	11	-38.9	-44.11	-49.22	-53.55	28.95	33.71	30.82	33.45	19	20	-41.37	-51.6	30.52	31.52	0	0
Düne	10	11	12	11	78.8	89.82	89.42	89.64	23.41	12.47	12.46	11.05	21	23	84.57	89.52	18.87	11.54	8	11	8	11	42.63	41.18	46.5	45.73	21.07	35.09	24.33	27.46	19	19	41.79	46.05	29.28	25.48	0	0
Dünger	10	10	12	11	59	62.2	70.17	77.91	25.67	21.85	25.38	20.73	20	23	60.6	73.87	23.26	23.09	8	10	10	9	5.5	-10.4	3.1	-16.44	32.59	19.49	38.75	28.23	18	19	-3.33	-6.16	26.54	34.72	0	0
Dunkelheit	12	8	11	12	65.92	78.75	74.36	75.58	34.24	30.56	26.07	27.79	20	23	71.05	75	32.63	26.37	9	9	8	11	6.89	-21.78	-31.63	-14.55	43.04	27.85	21.29	23.75	18	19	-7.44	-21.74	38.14	23.76	0	0
Dunst	10	10	13	10	56.2	57.6	66.38	71.6	26.04	26.86	31.95	28.77	20	23	56.9	68.65	25.76	30.04	9	9	8	11	4.11	-13.22	-13.25	-15.45	13.73	7.93	40.32	37.69	18	19	-4.56	-14.53	14.07	37.72	0	0
Durchfall	11	10	11	11	71.82	79.3	76.45	64.09	22.23	20.72	29.02	33.31	21	22	75.38	70.27	21.33	31.13	10	8	10	10	-69.8	-72.88	-59.2	-74.5	30.34	27.3	27.79	20.42	18	20	-71.17	-66.85	28.23	25	0	0
Durst	9	11	12	11	32.78	33.27	40.25	73.55	32.03	20.91	32.61	26.54	20	23	33.05	56.17	25.73	33.78	10	8	9	10	-31.6	-45.38	-22.56	-38	22.72	18.38	46.35	36.24	18	19	-37.72	-30.68	21.49	40.92	0	0
Dusche	9	11	12	11	87.67	95.36	96	84.18	9.81	6.86	7.11	19.78	20	23	91.9	90.35	8.98	15.48	10	8	8	11	42.9	49.13	39	56.18	25.68	37.78	30.23	25.7	18	19	45.67	48.95	30.78	28.25	0	0
Ebbe	11	10	14	10	74.91	66	89.64	71.8	22.25	22.43	11.49	27.33	21	24	70.67	82.21	22.24	21.16	9	9	9	10	34.22	3.22	24.89	20.1	22.48	25.96	18.52	25.47	18	19	18.72	22.37	28.45	21.97	0	0
Eber	10	10	11	12	90.3	81.1	96.73	83.25	14.24	18.67	4.78	16.51	20	23	85.7	89.7	16.84	13.93	9	9	9	10	7.22	-3.22	-4.78	-2.1	21.06	19.13	40.15	35.27	18	19	2	-3.37	20.25	36.61	0	0
Echo	12	9	13	9	48.25	34.22	36.23	49.33	35.33	32.04	33.68	40.7	21	22	42.24	41.59	33.88	36.37	9	9	10	9	17.44	43.89	15.1	24.67	11.9	35.47	18.55	24.28	18	19	30.67	19.63	29.05	21.4	0	0
Echse	11	9	14	9	86.18	83	88.57	82.22	15.01	15.37	18.35	18.42	20	23	84.75	86.09	14.86	18.23	9	9	9	10	18.33	5.89	17.11	3.2	22.7	24.59	38.7	31.86	18	19	12.11	9.79	23.83	34.99	0	0
Echtheit	9	12	12	10	18.67	15.08	39	34.3	17.3	15.29	36.01	25.16	21	22	16.62	36.86	15.86	30.92	8	10	9	10	30.25	37.4	48.67	43.3	35.33	39.13	40.79	34.2	18	19	34.22	45.84	36.57	36.49	0	0
Eckbank	11	9	11	11	71.82	83.44	95.64	94.73	23.39	13.39	6.3	4.8	20	22	77.05	95.18	19.96	5.48	10	10	9	10	8.3	12.7	30.11	19.7	16.15	21.79	19.54	35.59	20	19	10.5	24.63	18.8	28.84	0	0
Ecke	10	10	14	9	82.3	82.5	85.36	89.56	21.24	17.59	15.46	12.05	20	23	82.4	87	18.98	14.09	9	10	9	11	-4.56	-2.7	7.33	8.18	17.13	17.96	19.1	15.57	19	20	-3.58	7.8	17.11	16.78	0	0
Edelstein	9	11	11	11	75.89	73.18	91.82	82.91	25	28.62	10	15.37	20	22	74.4	87.36	26.39	13.45	10	8	7	12	21.3	19.5	50.86	55.08	30.07	21.59	33.1	35.18	18	19	20.5	53.53	25.91	33.56	0	0
Edelweiß	11	8	11	12	66.45	68.88	98	88.58	36.9	21.81	3.13	11.82	19	23	67.47	93.09	30.71	9.87	10	8	9	10	40.8	9.63	66.44	43.9	32.84	24.41	18.62	29.22	18	19	26.94	54.58	32.71	26.74	0	0
Efeu	10	10	12	11	80.7	88.5	93.5	89.27	14.51	15.06	9.81	10.41	20	23	84.6	91.48	14.94	10.1	11	7	10	9	21.64	35.57	15.4	30.22	37.73	26.68	25.77	35.18	18	19	27.06	22.42	33.72	30.66	0	0
Egge	8	7	12	11	61.38	60	85.92	84.45	37.94	20.94	25.9	22.27	15	23	60.73	85.22	30.14	23.69	8	7	9	11	16.38	1.57	18.56	10.73	19.66	7.61	15.13	20.51	15	20	9.47	14.25	16.63	18.27	.25	0
Ehe	9	11	12	11	46.33	33.91	52.17	73.64	33.74	21.07	36.85	32.67	20	23	39.5	62.43	27.44	35.84	9	10	9	10	21.89	25.3	69.56	48.4	34.73	38.3	26.01	41.59	19	19	23.68	58.42	35.67	35.82	0	0
Ehre	11	10	13	10	30.55	15.1	31.85	34.3	31.74	12.37	31.9	33.44	21	23	23.19	32.91	25.2	31.85	9	9	8	11	18.78	17.33	59.13	45.55	66.05	43.51	31.46	38.46	18	19	18.06	51.26	54.26	35.41	0	0
Ehrfurcht	11	8	11	11	33.82	14.25	41	40.64	29.97	13.61	29.62	25.32	19	22	25.58	40.82	25.87	26.89	10	9	8	11	-3.8	-1.89	29.13	41.82	47.27	26.76	52.37	28.77	19	19	-2.89	36.47	37.9	39.59	0	0
Ehrgeiz	9	11	13	10	29	24.27	29.92	34.6	27.96	22.23	24.53	23.41	20	23	26.4	31.96	24.39	23.62	9	10	8	11	7.78	22.3	18.38	13.55	46.77	21.58	48.87	43.07	19	19	15.42	15.58	35.51	44.33	0	0
Ei	11	8	12	11	93.73	97.38	97.17	93.45	6.5	2.88	3.97	7.19	19	23	95.26	95.39	5.49	5.91	10	8	9	10	30.5	21	53.11	48.1	24.29	17.88	30.19	33.81	18	19	26.28	50.47	21.62	31.36	0	0
Eibe	8	11	12	11	65.38	58.36	79	76.64	21.86	30.8	24.47	26.39	19	23	61.32	77.87	26.94	24.85	8	9	9	10	16.75	20.44	43.11	25.3	17.2	22.58	22.09	26.45	17	19	18.71	33.74	19.7	25.5	.1	0
Eiche	11	10	12	11	88.18	84.4	96.92	90.73	9.84	16.18	4.01	16.96	21	23	86.38	93.96	13.04	12.2	8	11	9	10	47.88	24.09	58	39.4	32.3	25.05	21.77	19.21	19	19	34.11	48.21	30	22.05	0	0
Eichel	12	10	13	10	93	93.1	96.46	94.1	7.02	6.31	5.04	4.65	22	23	93.05	95.43	6.55	4.92	8	10	10	9	48.25	20.3	24.7	36.89	36.73	27.35	38.65	29.52	18	19	32.72	30.47	33.99	34.25	0	0
Eidechse	9	10	12	11	79.44	88.1	91.17	87.64	21.73	12.61	19.7	16.62	19	23	84	89.48	17.58	17.97	10	8	8	11	25.8	18.25	39	18.36	38.01	34.67	21.35	27.09	18	19	22.44	27.05	35.7	26.36	0	0
Eifersucht	8	11	10	12	33.25	35	33.9	41	32.62	25.95	32.15	29.24	19	22	34.26	37.77	28.09	30.06	9	10	9	10	-67.56	-69	-59.22	-51.4	21.3	20.53	32.14	42.06	19	19	-68.32	-55.11	20.32	36.87	0	0
Eignung	10	10	11	12	19.4	14.2	18.55	33.17	25.55	14.71	18.12	26.05	20	23	16.8	26.17	20.46	23.33	11	8	9	10	-8.91	6.13	32	19.3	30.93	40.28	35.52	35.98	19	19	-2.58	25.32	34.94	35.36	0	0
Eimer	11	9	11	11	90.36	96.22	98.82	88.82	7.43	2.99	3.06	18.75	20	22	93	93.82	6.46	14.07	9	9	10	9	.22	3.22	13.8	15.44	9.92	9.73	15.61	21.35	18	19	1.72	14.58	9.66	18.03	0	0
Einbildung	10	11	11	11	20.8	24.09	21.09	30.73	18.98	18.75	22.1	27.61	21	22	22.52	25.91	18.46	24.9	10	9	9	10	-36.1	-25.44	-38.78	-21.5	23.57	9.53	42.13	32.73	19	19	-31.05	-29.68	18.66	37.46	0	0
Einblick	12	9	13	9	18.67	15.56	31	46.11	14.45	11.37	31.28	29.65	21	22	17.33	37.18	13	30.85	10	8	9	10	19.1	22.13	26.89	26	22.72	41.1	31.56	31.67	18	19	20.44	26.42	31.17	30.73	0	0
Einbrecher	10	11	13	9	75	56.18	71.85	72.33	14.02	24.28	32.57	27.5	21	22	65.14	72.05	21.82	29.91	10	9	8	12	-62.2	-61.44	-84	-86.17	21.42	30.48	14.58	18.36	19	20	-61.84	-85.3	25.34	16.58	0	0
Eindruck	11	9	9	13	21.18	23	35.33	38.38	21.47	24.47	28.51	27.27	20	22	22	37.14	22.26	27.15	9	10	10	10	25.78	15	4.8	22.1	35.63	25.6	9.03	27.93	19	20	20.11	13.45	30.38	22.06	0	0
Einfahrt	11	11	11	11	63	74.55	82.91	80.82	27.61	17.81	15.54	19.01	22	22	68.77	81.86	23.43	16.98	9	10	9	10	10.44	-2.3	10.44	19	23.3	20.21	16.99	24.28	19	19	3.74	14.95	22.1	21.03	0	0
Einfluss	10	9	12	11	27.7	18.89	23.5	27.18	28.91	17.55	23.2	28.29	19	23	23.53	25.26	23.98	25.23	8	10	9	10	-21.5	6	19.11	.6	21.84	37.4	31.29	28.08	18	19	-6.22	9.37	33.69	30.32	0	0
Eingang	10	11	12	11	59.1	66.09	84.5	86.64	22.92	26.95	18.63	18.07	21	23	62.76	85.52	24.75	17.98	9	10	10	9	13.67	10.9	22.4	17.89	21.65	11.6	22.62	17.84	19	19	12.21	20.26	16.66	20.07	0	0
Eingebung	11	9	14	9	13.64	23.22	29.36	32.11	12.5	18.88	29.93	26.08	20	23	17.95	30.43	16.01	27.9	10	8	9	10	27.4	30.63	28.11	38.7	17.95	28.52	27.34	31.06	18	19	28.83	33.68	22.54	29.05	0	0
Einheit	10	11	10	13	48.4	24.18	35.8	42.15	31.58	17.11	27.56	33.46	21	23	35.71	39.39	27.36	30.52	10	8	8	11	28.4	33.13	36.63	45.55	36.56	40.01	36.05	34.48	18	19	30.5	41.79	37.05	34.44	0	0
Einhorn	9	11	13	10	88.11	90.91	82.77	75	20.36	13.05	26.65	27.37	20	23	89.65	79.39	16.31	26.64	12	7	8	12	22	39.43	-.25	6.58	26.35	29.76	22.93	26.54	19	20	28.42	3.85	28.18	24.77	0	0
Einsamkeit	10	10	10	13	35.5	21	44.9	54.92	24.65	18.72	18.59	35.22	20	23	28.25	50.57	22.56	29.05	9	9	8	12	-64.67	-75.67	-41.13	-52.67	30.53	24.14	43.32	36.38	18	20	-70.17	-48.05	27.29	38.61	0	0
Einsicht	12	9	12	11	13.33	11.22	28.17	36	13.45	14.81	32.78	27.73	21	23	12.43	31.91	13.72	30.05	10	8	9	10	30.9	28	49.22	34.9	19.58	41.37	28.44	29.98	18	19	29.61	41.68	30.16	29.37	0	0
Eintopf	8	11	13	9	84.88	89.82	81.31	91.67	13.11	12.4	22.41	11.17	19	22	87.74	85.55	12.59	19.02	11	7	8	11	25.82	26.71	53.38	44.55	22.68	29.31	25.12	28.07	18	19	26.17	48.26	24.62	26.51	0	0
Eintracht	10	11	13	9	31.8	12.64	39.38	35.11	33.23	18.54	33.22	29.39	21	22	21.76	37.64	27.66	31.05	11	8	9	10	22.91	19.5	33.89	45.4	33.98	32.47	28.13	40.11	19	19	21.47	39.95	32.47	34.51	0	0
Einwand	12	8	12	11	22.17	17.38	32.25	38.64	23.83	21.82	32.36	34.1	20	23	20.25	35.3	22.58	32.6	10	8	9	10	-12.9	-22.25	-5.56	.8	23.26	23.21	41.27	31.48	18	19	-17.06	-2.21	23.05	35.54	0	0
Einwirkung	11	9	12	10	16.73	11	23.75	28	13.4	10.12	30.95	28.77	20	22	14.15	25.68	12.09	29.35	10	9	8	11	-6.6	-23.11	-8.13	6.09	24.11	21.74	27.84	37.31	19	19	-14.42	.11	23.93	33.57	0	0
Einzelheit	8	11	15	9	15.25	15.55	41.53	35.56	15.09	25.05	36.89	35.26	19	24	15.42	39.29	20.91	35.63	8	10	10	10	-1.75	11.2	11.7	22.2	12.74	17.11	16.77	32.21	18	20	5.44	16.95	16.3	25.57	0	0
Eis	10	11	13	9	91.1	89.64	87.54	94.22	7.25	10.38	15.49	6.7	21	22	90.33	90.27	8.83	12.87	9	10	8	11	13.89	31	36.88	28.91	38.17	27.6	45.06	28.09	19	19	22.89	32.26	33.25	35.28	0	0
Eisbahn	12	8	12	11	82.33	79.63	93	89.82	14.72	18.84	9.11	9.67	20	23	81.25	91.48	16.07	9.31	8	10	9	10	23.13	22.6	28.11	25.1	35.8	31.51	32.59	34.43	18	19	22.83	26.53	32.46	32.66	0	0
Eisbär	11	9	11	12	94.82	96.67	97.73	91.58	7.12	3.08	3.35	10.56	20	23	95.65	94.52	5.62	8.41	9	9	9	10	33.56	44.67	29.89	23.7	23.28	33.07	55.7	54.47	18	19	39.11	26.63	28.32	53.59	0	0
Eisbecher	10	10	12	10	86.9	89.1	92.92	95.3	8.86	12.03	11.86	4.32	20	22	88	94	10.35	9.12	10	9	9	10	26.6	31.22	57.56	51.8	37.98	42.88	26.43	32.5	19	19	28.79	54.53	39.3	29.11	0	0
Eisdiele	9	11	11	12	65.67	77.82	80.18	90.58	31.3	16.9	26.06	11.09	20	23	72.35	85.61	24.52	19.96	9	9	9	10	33.33	40.67	45.11	46.2	25.23	36.5	25.59	27.33	18	19	37	45.68	30.67	25.78	0	0
Eisen	10	10	13	10	69	67.3	80	84.2	23.99	17.7	23.93	20.19	20	23	68.15	81.83	20.54	21.99	9	9	9	10	6.89	1.56	7.78	3.2	28.79	19.35	16.87	21.93	18	19	4.22	5.37	23.95	19.3	0	0
Eisenbahn	8	12	10	13	87.13	92.67	94.7	94.62	13.81	6.95	7.09	6.41	20	23	90.45	94.65	10.29	6.55	10	8	9	10	34	21.25	53.78	51	37.73	24.48	21.55	18.14	18	19	28.33	52.32	32.29	19.31	0	0
Eisfach	10	11	11	12	76	84.82	80	85.08	26.29	16.96	21.34	22.14	21	23	80.62	82.65	21.8	21.42	11	8	9	10	13.45	11.75	13.33	19	18.48	15.87	41.87	28.09	19	19	12.74	16.32	16.98	34.39	0	0
Eiswürfel	10	11	12	10	89.3	95.09	94.5	85.7	9.65	7.38	6.82	25.97	21	22	92.33	90.5	8.83	18.26	9	9	9	10	32.44	16.67	21.78	10.1	24.95	16.05	22.32	24.69	18	19	24.56	15.63	21.91	23.71	0	0
Eiszeit	12	9	11	12	65.42	56.22	68.18	66.67	29.01	31.03	24.99	25.79	21	23	61.48	67.39	29.49	24.84	9	9	10	9	11.33	-20.56	-49.3	-13.22	43.55	31.17	32.05	40.44	18	19	-4.61	-32.21	40.23	39.79	0	0
Elch	10	10	10	12	93.8	95.9	95.9	80.75	6.23	3.18	6.33	21.55	20	22	94.85	87.64	4.93	17.89	10	8	11	8	43.9	39.25	53.36	39.13	29.06	32.91	37.68	36.71	18	19	41.83	47.37	29.98	36.94	0	0
Elefant	9	10	11	13	94.67	97.3	97.45	94.85	8.03	3.5	3.27	9.98	19	24	96.05	96.04	6.05	7.64	8	10	8	11	37.13	42.6	58.13	46.18	22.7	34.04	21.94	24.49	18	19	40.17	51.21	28.87	23.6	0	0
Element	10	9	12	12	54.2	31.78	40.5	40.08	30.83	24.52	36.15	30.36	19	24	43.58	40.29	29.58	32.65	8	10	9	10	18.13	21.2	-3.89	10.5	18.64	27.8	30.42	13.48	18	19	19.83	3.68	23.55	23.59	0	0
Elend	12	9	12	11	53.42	24.11	51.25	44.09	30.62	20.39	27.93	31.93	21	23	40.86	47.83	30.05	29.44	10	9	9	10	-63.8	-74.44	-77.44	-78.4	23.49	33.41	24.05	25.1	19	19	-68.84	-77.95	28.32	23.92	0	0
Elfe	9	11	13	10	75.22	77.64	58.08	84.6	18.82	26.8	36.39	22.77	20	23	76.55	69.61	22.99	33.4	9	9	9	10	47	50.67	27.67	20.6	34.68	32.27	27.78	34.31	18	19	48.83	23.95	32.55	30.73	0	0
Elfenbein	12	8	13	9	75.42	71	88.08	76.11	21.77	23.93	23.25	25.14	20	22	73.65	83.18	22.14	24.2	10	9	10	9	7.4	-8.11	34.6	42.22	35.51	37.73	31.45	30.49	19	19	.05	38.21	36.42	30.38	0	0
Elite	11	9	12	11	36.45	29.33	43.92	59.45	28.42	28.57	40.48	30.67	20	23	33.25	51.35	27.97	36.2	10	8	8	11	-12	-25.88	21.25	37.82	45.6	20.73	49.4	35.53	18	19	-18.17	30.84	36.45	41.49	0	0
Elster	9	11	12	11	79.89	80.73	95.33	92.18	19.93	17.42	8.12	7.81	20	23	80.35	93.83	18.09	7.95	10	9	9	10	17.6	5.33	15.22	13.1	29.33	20.26	53.43	28.33	19	19	11.79	14.11	25.54	40.88	0	0
Eltern	10	10	12	11	70.8	74.6	80.5	80.73	28.07	26.54	31.6	24.19	20	23	72.7	80.61	26.66	27.66	9	9	10	10	51.89	54.56	89.9	83.5	48.15	50.29	22.41	15.05	18	20	53.22	86.7	47.78	18.87	0	0
Empfindung	10	11	12	10	22.9	13.45	34.17	30.3	19.77	12.44	27.66	33.07	21	22	17.95	32.41	16.63	29.55	9	9	9	10	38	38.78	11.56	34.7	31.59	28.44	11.31	36.2	18	19	38.39	23.74	29.16	29.21	0	0
Ende	14	15	15	17	52.21	49.27	56	54.12	32.48	22.86	27.11	25.19	29	32	50.69	55	27.45	25.7	9	9	9	10	-33.78	-10.89	-2.33	9.6	22.45	49.89	17.81	42.79	18	19	-22.33	3.95	39.33	33.07	0	0
Enge	10	11	12	11	48.9	47.82	61.08	57.45	25.16	27.18	27.53	28.92	21	23	48.33	59.35	25.58	27.61	8	10	10	9	-45.5	-46.6	-48.1	-30.44	34.08	28.85	29.79	29.51	18	19	-46.11	-39.74	30.32	30.22	0	0
Engel	11	9	12	10	89.64	88.78	90.33	85.3	11.83	18.28	8.57	21.67	20	22	89.25	88.05	14.65	15.69	9	9	10	9	55.33	57.56	58.1	38	42.01	34.64	34.29	38.9	18	19	56.44	48.58	37.37	36.97	0	0
Ente	11	10	13	10	91.09	95.2	94.46	92.7	9.28	6.12	7.58	10.41	21	23	93.05	93.7	8.02	8.75	10	8	8	11	37.3	38.38	59.75	40	22.14	28.15	26.09	25.95	18	19	37.78	48.32	24.21	27.19	0	0
Entführung	11	9	13	10	44.09	33.22	53.08	57.4	26.04	24.07	31.39	39.26	20	23	39.2	54.96	25.13	34.24	8	11	9	10	-65.25	-66.09	-78.89	-77.2	26.99	31.01	18.74	20.13	19	19	-65.74	-78	28.6	18.96	0	0
Enthüllung	11	9	13	10	37.55	34.44	43.38	36.5	28.11	27.87	30.29	28.53	20	23	36.15	40.39	27.3	29.08	10	9	7	12	-12.4	-32.11	10.14	6.92	29.14	22.36	32.05	33.56	19	19	-21.74	8.11	27.37	32.14	0	0
Entstehung	9	10	12	10	24.11	16.7	25.83	30.5	21.79	13.71	21.21	35.23	19	22	20.21	27.95	17.87	27.81	10	9	8	11	26.4	34.67	12.75	11.55	23.79	21.95	14.52	22.68	19	19	30.32	12.05	22.7	19.19	0	0
Epoche	11	10	13	10	20.64	23.5	32.62	45.2	25.56	19.72	34.03	33.25	21	23	22	38.09	22.45	33.54	10	8	8	11	15.6	15	6	10.73	24.01	39.08	14.18	19.47	18	19	15.33	8.74	30.57	17.16	0	0
Erbse	10	9	12	11	85.9	93.56	95.5	88	11.82	5.2	5.5	21.34	19	23	89.53	91.91	9.86	15.39	10	10	9	10	13.4	18.9	39.44	20.1	13.07	24.55	27.85	20.38	20	19	16.15	29.26	19.35	25.51	0	0
Erdbeben	9	9	12	11	75.89	58.11	75.42	73.73	32.35	28.06	23.55	28.94	18	23	67	74.61	30.76	25.67	10	9	9	10	-51.5	-53.56	-84.44	-69.2	30.85	33.69	24.57	50.28	19	19	-52.47	-76.42	31.33	39.92	0	0
Erdbeere	14	15	15	17	96.71	98.6	89.33	83.35	5.99	2.69	25.13	25.48	29	32	97.69	86.16	4.61	25.09	10	8	10	9	39.1	54.13	71.5	66.22	22.91	21.24	23.53	26.89	18	19	45.78	69	22.86	24.61	0	0
Erde	9	10	14	8	83.78	88.3	86.93	80.88	28.33	15.55	16.71	20.39	19	22	86.16	84.73	21.98	17.89	11	7	9	10	48.91	43	43.67	46.6	37.09	44.02	29.94	30.12	18	19	46.61	45.21	38.75	29.23	0	0
Ereignis	9	11	10	13	22.22	13.82	29.4	45.08	16.2	17.46	23.82	37.03	20	23	17.6	38.26	17.01	32.3	11	8	10	9	27.36	19.13	21.6	22.56	33.3	32.93	22.68	18.02	19	19	23.89	22.05	32.49	20.05	0	0
Erfahrung	10	11	9	13	28.5	19.09	36	42.92	35.94	18.89	24.5	29.83	21	22	23.57	40.09	27.98	27.37	8	10	10	9	41.63	51	53.2	60	23.49	26.92	36.56	30.25	18	19	46.83	56.42	25.18	32.97	0	.04
Erfindung	10	11	13	10	37.3	19.82	45.62	53.4	29.68	16.71	32.29	36.91	21	23	28.14	49	24.82	33.79	9	9	9	10	44.89	41.11	66.56	49.5	29.28	22.99	27	29.06	18	19	43	57.58	25.61	28.69	0	0
Erfolg	10	10	10	13	32.8	28.6	33.5	52.46	23.6	18.78	22.91	36.53	20	23	30.7	44.22	20.87	32.17	9	9	9	11	54.67	49.89	65.44	61.55	23.62	26.24	28.62	31.26	18	20	52.28	63.3	24.35	29.38	0	0
Ergänzung	11	9	12	11	15.82	14.44	17.67	39.18	15.57	17.97	19.96	36.44	20	23	15.2	27.96	16.25	30.39	10	9	8	11	2.3	8.44	16.13	18.64	25.79	10.96	18.7	21.51	19	19	5.21	17.58	19.89	19.86	0	0
Ergebnis	11	10	11	12	37.36	30.2	41.09	37	32.7	22.37	23.99	32	21	23	33.95	38.96	27.81	27.89	10	9	9	10	7	24	7.67	27.1	31.27	21.09	13.73	28.05	19	19	15.05	17.89	27.61	24.01	0	0
Erholung	10	8	13	10	40.4	28	39.69	37.4	25.89	24.14	27.73	32.77	18	23	34.89	38.7	25.2	29.32	9	9	11	8	63.89	76	66.82	72.25	19.88	31.28	21.73	20.98	18	19	69.94	69.11	26.18	21.01	0	0
Erkenntnis	10	9	12	11	20.3	15.78	25.67	30.45	16.43	15.58	30.42	34.14	19	23	18.16	27.96	15.75	31.6	8	11	11	9	52.25	62.45	45	41.11	22.76	34.42	28.44	40.05	19	20	58.16	43.25	29.77	33.24	0	0
Erklärung	11	10	13	10	10.64	16.2	42.38	41.2	8.78	17.45	29.57	35.3	21	23	13.29	41.87	13.55	31.42	9	9	8	11	15.33	29.89	10.5	11.64	29.21	31.5	11.4	21.62	18	19	22.61	11.16	30.41	17.62	0	0
Erlösung	12	8	12	11	25	26.75	35.67	30.73	25.98	27.64	34.36	29.21	20	23	25.7	33.3	25.94	31.38	10	9	9	10	37.2	46.33	51.67	29.1	39.05	16.12	32.06	45.49	19	19	41.53	39.79	30	40.32	0	0
Ermittlung	11	9	10	12	28.55	27.11	44	34.92	19.91	18.5	37.14	32.57	20	22	27.9	39.05	18.8	34.18	8	10	8	11	-19.25	-7.8	-.38	-7.55	33.98	31.32	22.08	30.23	18	19	-12.89	-4.53	32.08	26.65	0	0
Ermüdung	9	10	13	10	35.67	35.9	49.23	48.7	19.35	25.15	37.01	36.82	19	23	35.79	49	21.97	36.08	8	10	9	11	-27.75	-23.3	-27.11	-26	8.65	22.52	30.75	38.37	18	20	-25.28	-26.5	17.45	34.25	0	0
Ernst	12	10	13	10	26.92	13	27.31	36.2	26.58	15.14	18.71	29.92	22	23	20.59	31.17	22.77	24.03	9	9	9	9	-7.33	-17.33	16.67	.89	20.97	12.25	37.36	21.26	18	18	-12.33	8.78	17.44	30.58	0	0
Ernte	9	10	12	11	61.67	50.9	81.5	70.18	31.4	15.69	19.67	28.4	19	23	56	76.09	24.33	24.36	10	8	11	9	39.8	36.5	68.27	58.78	23.17	31.2	24.9	25.16	18	20	38.33	64	26.22	24.83	0	0
Ersatz	11	10	12	10	14.91	20.1	27.42	38	13.48	22.12	21.37	32.27	21	22	17.38	32.23	17.83	26.73	10	9	9	10	-10.9	-14.33	-9.11	6.3	32.08	21.2	40.06	18.86	19	19	-12.53	-1	26.78	30.88	0	0
Erwägung	10	11	12	11	8.7	15.82	37.5	24.73	10.91	18.09	34.44	22.12	21	23	12.43	31.39	15.18	29.29	12	7	9	10	-3.75	2.86	7.33	4.8	14.12	5.67	9.94	11.44	19	19	-1.32	6	11.97	10.54	0	0
Esel	11	9	11	12	94.73	94.22	98.45	91.92	6.2	6.78	2.84	10.78	20	23	94.5	95.04	6.3	8.54	8	10	8	11	6.38	-4.8	40	27.36	26.72	35.02	25.13	28.69	18	19	.17	32.68	31.24	27.27	0	0
Eskimo	9	11	14	9	77.89	82.55	93.43	84.67	23.24	22.86	9.01	16.09	20	23	80.45	90	22.54	12.7	10	8	9	10	23.3	45.38	38.44	30	25.14	38.23	27.4	22.23	18	19	33.11	34	32.62	24.48	0	0
Essen	10	10	11	12	70.7	79.7	80.82	82.92	16.92	17.37	29.27	21.56	20	23	75.2	81.91	17.32	24.96	8	10	9	11	49.13	52.1	62.78	51.27	28.9	32.3	19.86	31.98	18	20	50.78	56.45	29.97	27.18	0	0
Essig	10	10	14	9	75.8	73.7	71.86	83.33	15.75	18.55	30.4	21.08	20	23	74.75	76.35	16.79	27.21	11	7	9	10	-3.82	-13	10.22	10	26.87	23.02	17.74	30.16	18	19	-7.39	10.11	25.16	24.39	0	0
Esstisch	12	8	12	11	71.83	88.75	88.83	92.55	21.37	11.37	16.77	11.08	20	23	78.6	90.61	19.6	14.14	11	8	9	10	24.27	14.63	44.22	24.7	21.2	23.79	26.86	35.49	19	19	20.21	33.95	22.22	32.41	0	0
Etui	10	10	13	9	68.2	86.5	84.77	87.44	21.95	12.2	21.89	19.31	20	22	77.35	85.86	19.67	20.44	10	9	9	9	-4	14.56	15.67	9.11	25.77	20.92	14.04	28.31	19	18	4.79	12.39	24.84	21.94	0	0
Eule	9	11	12	11	92.56	96.45	98.33	88.55	7.2	5.03	2.53	17.2	20	23	94.7	93.65	6.25	12.76	10	8	10	9	32.4	34.63	48.5	40	36.84	29.85	33.39	40.95	18	19	33.39	44.47	32.96	36.35	0	0
Euter	12	10	13	10	86.5	85.7	88.23	87	15.35	14.31	13.66	26.28	22	23	86.14	87.7	14.54	19.62	10	9	10	9	21.5	8.33	21.7	-9.44	33.71	17.31	22.77	20.96	19	19	15.26	6.95	27.33	26.64	0	0
Ewigkeit	11	9	12	11	22.18	23.56	25.75	26	28.52	19.01	31.05	28.89	20	23	22.8	25.87	24.1	29.35	9	9	8	11	9	13.67	30.88	15.45	50.21	41.41	53.73	44.23	18	19	11.33	21.95	44.71	47.65	0	0
Exil	8	11	12	11	30.75	22.18	47.25	51.09	28.98	23.08	30.15	36.74	19	23	25.79	49.09	25.32	32.74	9	10	8	11	-48.44	-51.2	-34.5	-40.64	35.07	31.48	31.41	35.03	19	19	-49.89	-38.05	32.31	32.79	0	0
Existenz	11	10	11	12	22.18	8.3	25.64	51.5	21.15	7.97	21.68	35.83	21	23	15.57	39.13	17.4	32.09	12	7	9	11	23.5	14.43	32.56	37	31.95	31.86	35.61	34.14	19	20	20.16	35	31.34	33.95	0	0
Fabrik	10	10	13	10	73.7	73.2	90.46	76.1	28.94	18.72	11.75	31.32	20	23	73.45	84.22	23.73	23.01	11	8	9	10	-13.27	-25.75	4.56	8.8	32.31	24.6	36.65	14	19	19	-18.53	6.79	29.24	26.45	0	0
Fabrikat	12	9	11	11	26.33	36.56	57.36	53.36	27.77	33.32	27.65	26.75	21	22	30.71	55.36	29.92	26.63	8	10	8	11	-3.5	.7	14.5	7.18	30.77	12.76	25.62	11.28	18	19	-1.17	10.26	21.93	18.43	0	0
Fackel	11	9	13	10	78.91	86.78	83.15	85.8	16.48	9.56	26.35	22.65	20	23	82.45	84.3	14.06	24.3	10	8	9	10	27	18.75	9.67	17.7	29.84	23.38	15.19	30.5	18	19	23.33	13.89	26.73	24.18	.03	0
Faden	10	10	13	9	76.3	83.6	90.54	82.89	27.02	14.25	14.9	28.14	20	22	79.95	87.41	21.35	21.06	9	10	9	10	12.44	1.3	10.44	22.3	16.85	6.88	16.39	24.22	19	19	6.58	16.68	13.51	21.21	0	0
Fagott	10	9	10	13	77.4	72.33	81.2	85.54	21.04	23.46	25.19	21.5	19	23	75	83.65	21.74	22.73	10	9	10	10	24.9	16.56	38	41.1	23.05	17.81	29.63	34.09	19	20	20.95	39.55	20.61	31.13	.03	0
Fähigkeit	10	10	12	11	16.8	22.1	28.08	43.09	22.38	19.51	31.82	35.86	20	23	19.45	35.26	20.62	33.9	10	9	8	11	25.5	54.89	44.5	50.55	25.03	31.64	33.68	27.69	19	19	39.42	48	31.39	29.6	0	0
Fahne	11	8	10	13	90	94.38	86.8	85.92	8.2	7.73	16.4	24.22	19	23	91.84	86.3	8.09	20.74	7	11	8	11	12.86	-4.91	6.63	3.91	28.35	23.19	12.01	37.52	18	19	2	5.05	26.07	28.98	0	0
Fähre	11	8	11	12	80.36	76.63	95.64	82.58	19.7	20.42	6.14	22.65	19	23	78.79	88.83	19.53	17.83	7	11	9	10	26.71	25.73	39.33	42.1	25.78	34.51	31.53	28.81	18	19	26.11	40.79	30.58	29.3	0	0
Fahrkarte	8	12	12	11	78.88	91.67	93.42	87.27	21.71	8.48	5.9	21.1	20	23	86.55	90.48	16.02	15.15	8	11	7	12	-7.25	5.64	20.57	43.67	39.23	32.97	28.84	32.68	19	19	.21	35.16	35.29	32.57	0	0
Fahrrad	10	10	12	10	93.7	94.9	96.92	90.6	5.96	5.04	4.52	9.79	20	22	94.3	94.05	5.41	7.88	8	10	9	11	30.13	24.6	55.33	43.45	28.21	28.37	25.29	30.39	18	20	27.06	48.8	27.6	28.14	0	0
Fahrstuhl	12	7	12	12	89.92	84.57	94.83	90.58	9.32	19.18	6.04	11.37	19	24	87.95	92.71	13.52	9.16	9	9	9	10	6.33	16.33	16.44	11.3	24.8	23.12	37.15	40.27	18	19	11.33	13.74	23.82	37.83	0	0
Fahrt	11	8	11	12	41.91	63.5	59.09	67.25	24.69	30.09	26.96	33.24	19	23	51	63.35	28.47	30.01	9	9	9	10	24.56	31.33	34.11	47.8	22.13	32.75	15.24	30.04	18	19	27.94	41.32	27.34	24.57	0	0
Fahrzeug	9	11	12	11	75.89	80.36	82.75	87.82	16.35	20.29	19.41	15.97	20	23	78.35	85.17	18.29	17.63	9	9	9	10	22.44	11.56	35.44	38.9	38.91	14.73	32.44	22.64	18	19	17	37.26	29.08	26.96	0	0
Fakir	10	9	11	12	75.6	73.56	86.36	79.08	21.95	29.03	15.06	19.48	19	23	74.63	82.57	24.83	17.51	9	10	11	8	2.44	13.1	-15.73	-7.75	32.58	37.3	30.91	31.31	19	19	8.05	-12.37	34.6	30.47	0	0
Falke	10	9	12	11	87.2	83.11	96.58	88.64	13.42	17.47	4.6	12.26	19	23	85.26	92.78	15.17	9.77	9	10	8	11	26.89	18.5	49.13	25.18	32.04	16.15	30.32	28.44	19	19	22.47	35.26	24.6	30.89	0	0
Fall	9	11	13	9	41.22	45.18	46	44.78	23.96	31.77	26.04	33.88	20	22	43.4	45.5	27.88	28.72	13	13	12	13	-16.69	-40.54	-12.33	-26.31	26.74	39.28	49.05	39.38	26	25	-28.62	-19.6	35.1	43.92	0	0
Fallschirm	10	10	11	12	87.8	91.1	93	83	11.26	12.05	12.85	13.56	20	23	89.45	87.78	11.48	13.9	8	10	9	10	22.25	14	12.11	25.3	46.29	46.34	30.42	32.49	18	19	17.67	19.05	45.13	31.38	0	0
Falter	9	12	13	10	80.67	85.42	88.08	79.5	18.66	14.58	18.1	17.48	21	23	83.38	84.35	16.19	17.96	9	9	10	8	18.56	26	57.7	43.75	25.76	22.53	27.48	26.55	18	18	22.28	51.5	23.79	27.22	.04	0
Fanfare	10	10	12	11	62.4	62.1	87	82.18	27.97	24.48	26.67	17.27	20	23	62.25	84.7	25.58	22.3	10	9	9	9	13.9	20.67	4.22	20.78	29.89	32.03	40.01	33.98	19	18	17.11	12.5	30.24	37	0	0
Farbband	10	8	12	11	65	59.38	80.17	84.55	30.87	31.6	26.47	23.2	18	23	62.5	82.26	30.4	24.5	10	9	10	10	11.9	7.22	14.1	17.6	17.9	13.25	19.97	22.45	19	20	9.68	15.85	15.62	20.76	0	0
Farbe	11	9	13	10	68.64	64.44	81.77	73.4	21.77	18.3	20.37	27.7	20	23	66.75	78.13	19.88	23.62	9	9	9	10	32.22	39.67	42	14.5	15.41	34.34	20.8	18	18	19	35.94	27.53	26.1	23.52	0	0
Farm	10	11	10	13	73.5	70.91	82.5	83	24.68	23.89	16.45	14.89	21	23	72.14	82.78	23.69	15.22	9	9	9	10	24.78	34.56	51.33	34.3	19.05	28.43	25.74	20.62	18	19	29.67	42.37	24.01	24.16	0	0
Farn	10	11	11	11	78.2	83.09	86.45	85	16.62	18.64	19.51	15.19	21	22	80.76	85.73	17.44	17.08	8	10	11	8	27.25	20.3	38	36.5	23.55	30.13	24.33	27.07	18	19	23.39	37.37	26.86	24.79	0	0
Fasching	9	11	12	11	65.11	64.18	69.25	81.64	23.21	13.71	17.54	20.04	20	23	64.6	75.17	18.06	19.4	7	10	12	7	-13.86	23.7	18.75	31.57	32.5	44.2	42.5	62.19	17	19	8.24	23.47	43.1	49.33	0	0
Faser	10	10	14	9	59.9	65.5	76.64	67.89	31.34	18.28	20.72	31.43	20	23	62.7	73.22	25.14	25.14	9	9	10	9	9	4.44	12	8.44	18.73	15.48	17.01	25.86	18	19	6.72	10.32	16.83	21.1	0	0
Fass	11	9	10	13	85.64	84.44	96.2	86.08	14.19	15.61	4.92	23.55	20	23	85.1	90.48	14.45	18.4	9	9	8	11	5.22	4.78	31.5	18	27.82	7.61	31.86	15.03	18	19	5	23.68	19.79	23.82	0	0
Faultier	11	9	11	12	91.27	79.67	79.45	75.17	11.14	16.3	26.19	29.3	20	23	86.05	77.22	14.57	27.31	9	9	8	11	24.56	16.11	9.38	-7.73	47.92	44.22	52.75	24.22	18	19	20.33	-.53	44.94	38.51	0	0
Faust	10	9	13	10	88.8	96.22	89.23	93.1	13.89	3.56	16.78	7.96	19	23	92.32	90.91	10.8	13.54	11	8	9	11	-9.18	-23.13	4.22	-11.82	28.46	21.42	36.73	42.5	19	20	-15.05	-4.6	26.05	39.82	0	0
Fax	12	9	11	12	79.83	82.11	66	76.75	26.37	18.97	33.89	29.98	21	23	80.81	71.61	22.98	31.65	9	10	9	10	5.89	-.8	6.89	22.9	17.24	15.83	16.76	16.91	19	19	2.37	15.32	16.41	18.31	0	0
Faxgerät	11	8	11	12	84.82	85	85.73	84.67	13.7	18.58	25.7	20.43	19	23	84.89	85.17	15.44	22.57	9	10	8	11	-.89	.7	16	17.91	18.13	20.62	26.03	20.94	19	19	-.05	17.11	18.95	22.54	0	0
Fechter	11	9	12	11	63.45	62.22	62.42	73.55	22.11	16.81	32.09	27.66	20	23	62.9	67.74	19.41	29.92	10	8	8	12	7.8	4.38	11	23.5	25.44	36.21	14.49	25.96	18	20	6.28	18.5	29.76	22.51	0	0
Feder	10	8	12	10	87.6	94.25	83.17	85.4	11.56	4.4	21.33	19.06	18	22	90.56	84.18	9.5	19.88	10	9	8	11	28.6	44.22	33.88	24	25.82	22.45	32.76	16.72	19	19	36	28.16	24.93	24.45	0	0
Fee	10	9	12	11	76.7	77.33	52.75	61.64	17.93	15.98	37.5	27.54	19	23	77	57	16.56	32.69	10	9	9	10	48	56.44	32.11	44.5	24.94	27.78	25.81	40.22	19	19	52	38.63	25.94	33.84	0	0
Feger	11	9	12	11	66.36	67.22	65.17	68.55	16.29	30.31	31.12	33.07	20	23	66.75	66.78	22.95	31.38	8	10	9	10	-5.25	-5.1	5	1.4	34.41	18.05	12.67	30.3	18	19	-5.17	3.11	25.69	23.1	0	0
Feier	10	10	10	13	52.6	49.9	71.9	61.54	27.37	24.83	29.09	32.55	20	23	51.25	66.04	25.47	30.85	8	10	10	8	40	46.7	61	52.25	55.7	33.38	19.27	38.66	18	18	43.72	57.11	43.35	28.84	0	0
Feigling	11	10	12	11	38.64	32.1	43.33	46.18	23.67	30.63	22.79	30.84	21	23	35.52	44.7	26.71	26.34	8	11	9	10	-40.25	-49	-53.33	-39.9	27.73	27.77	24.66	30.18	19	19	-45.32	-46.26	27.34	27.81	0	0
Feile	10	9	10	12	88.6	92.44	94	83.08	15.69	7.63	10.67	21.43	19	22	90.42	88.05	12.36	17.9	8	10	8	11	-2.5	1	22.63	9.27	28.24	12.66	35.28	15.79	18	19	-.56	14.89	20.41	25.85	0	0
Feld	11	9	12	11	76.82	80.44	89.17	80	20.23	14.55	16.04	22.54	20	23	78.45	84.78	17.55	19.53	10	8	9	10	23.2	17.88	31.89	22.2	17.27	14.98	23.02	22.55	18	19	20.83	26.79	16.05	22.69	0	0
Fell	10	10	12	10	73.2	82.5	95.75	85.8	17.93	16.56	6.45	15.65	20	22	77.85	91.23	17.46	12.35	8	10	10	10	28.88	43.1	33	40	32.83	31.98	21.07	23.63	18	20	36.78	36.5	32.22	22.08	0	0
Fels	10	9	13	10	89.6	87.22	90.85	86.5	7.2	12.5	15.24	14.27	19	23	88.47	88.96	9.84	14.66	8	10	7	11	41.88	24	13.86	13.09	30.68	25.18	29.64	47.38	18	18	31.94	13.39	28.41	40.38	0	.04
Fenster	12	8	13	10	88.92	92.13	97.23	88.6	10.09	11.04	2.92	13.08	20	23	90.2	93.48	10.31	9.69	9	10	8	11	28.22	41.7	30.5	39.45	18.21	37.55	25.34	25.94	19	19	35.32	35.68	30	25.38	0	0
Ferien	10	9	12	11	49.3	40.44	47.17	68	25.07	26.06	34.5	31.96	19	23	45.11	57.13	25.23	34.24	9	9	9	9	63.78	77.67	72.11	74.33	32.48	27.89	31.68	25.96	18	18	70.72	73.22	30.23	28.12	0	0
Ferkel	10	10	12	11	89.4	87.7	97.33	91	9.2	10.91	4.29	10.71	20	23	88.55	94.3	9.86	8.48	9	9	9	10	32.67	20.22	41.44	13.1	22.64	17.44	34.08	34.94	18	19	26.44	26.53	20.63	36.58	0	0
Fernrohr	10	11	12	11	87.1	91.27	97.08	90.45	14.93	6.66	4.68	8.23	21	23	89.29	93.91	11.27	7.29	9	10	9	10	27.78	29.1	36.78	31.3	15.32	24.07	27.62	22.45	19	19	28.47	33.89	19.86	24.47	0	0
Fernseher	11	9	12	11	93.27	93.33	97.08	92.82	7.13	8.94	5.73	8.93	20	23	93.3	95.04	7.77	7.58	9	9	9	10	1.33	22.78	31.67	46.7	45.51	16.3	13.39	27.68	18	19	12.06	39.58	34.95	22.86	0	0
Ferse	10	10	11	12	69.7	78	86.36	89.83	27.37	15.74	16.38	12.7	20	23	73.85	88.17	22.15	14.34	8	10	11	8	-5.75	-3.5	0	13.25	18.45	11.51	25.87	11.9	18	19	-4.5	5.58	14.55	21.73	0	0
Fertigung	9	11	13	10	41.44	13.45	54	51.8	30.39	11.68	30.96	33.99	20	23	26.05	53.04	25.79	31.57	9	10	9	10	-3.89	-1.9	18.67	18.4	33.3	26.75	22.44	13.85	19	19	-2.84	18.53	29.18	17.88	0	0
Fessel	10	10	12	11	81.1	81.4	64.33	80.09	19.45	12.34	23.96	20.38	20	23	81.25	71.87	15.85	23.25	8	10	10	9	-8.5	-54.1	-59.7	-63.56	39.85	31.07	25.23	25.53	18	19	-33.83	-61.53	41.34	24.74	0	0
Fest	10	11	12	11	58.3	69.09	74.42	74	27.85	16.26	24.71	25.14	21	23	63.95	74.22	22.62	24.34	10	8	9	10	44.5	59.38	60.89	72.5	36.2	36.78	25.4	18.17	18	19	51.11	67	36.18	22.08	0	0
Festessen	11	9	12	11	68	77	77.92	74.27	26.73	13.8	17.8	29.95	20	23	72.05	76.17	21.85	23.87	8	10	10	9	47.75	60.7	59.3	68.67	35.76	36.02	42.9	27.04	18	19	54.94	63.74	35.46	35.61	0	0
Fetzen	11	11	13	10	64.64	72.36	72.46	75	23.01	27.11	29.55	29.77	22	23	68.5	73.57	24.86	28.99	8	10	8	11	-7.5	-24.1	-14.75	-25.55	26.46	22.98	26.82	21.29	18	19	-16.72	-21	25.3	23.69	0	0
Feuer	12	9	13	10	89.25	92.89	93.85	87.7	11.06	9.53	9.94	25.19	21	23	90.81	91.17	10.35	17.98	8	11	9	10	20	17.64	-35.78	-16.7	53.81	69.41	56.09	62.43	19	19	18.63	-25.74	61.68	58.67	0	0
Feuerwehr	11	8	12	11	82.27	80.63	97.08	86.91	15.3	19.16	4.32	15.97	19	23	81.58	92.22	16.54	12.34	8	10	11	10	29.63	-.4	38.55	2.2	43.29	40.11	43.57	63.53	18	21	12.94	21.24	43.12	55.78	0	0
Feuerzeug	9	11	12	11	90.89	93.82	96	89.45	12.06	7.92	7.75	16.47	20	23	92.5	92.87	9.82	12.83	8	10	9	10	18.25	1.7	7	-3.4	16.8	30.45	30.92	13.19	18	19	9.06	1.53	26.05	23.25	0	0
Fichte	11	9	12	11	86.64	74.67	87	89.27	6.31	17.83	15.56	11.76	20	23	81.25	88.09	13.86	13.61	9	10	10	9	33.67	18.6	51.3	36.78	24.09	19.82	24.62	17.64	19	19	25.74	44.42	22.67	22.29	0	0
Fieber	10	10	12	11	45.4	42.7	62.92	64.91	32.09	25.7	34.4	28.19	20	23	44.05	63.87	28.33	30.88	8	10	8	11	-55.25	-45.5	-53.88	-55.09	18.34	35.95	24.12	25.82	18	19	-49.83	-54.58	29.12	24.43	0	0
Fiedel	10	11	12	10	74.8	72.27	78.75	77.4	17.71	19.41	26.52	24.19	21	22	73.48	78.14	18.2	24.89	9	10	10	9	15.78	11.3	21	16.33	14.76	17.1	35.42	20.59	19	19	13.42	18.79	15.76	28.66	0	0
Figur	11	8	11	11	45.64	61.5	73.73	79.18	28.37	16	23.43	23.8	19	22	52.32	76.45	24.73	23.21	9	10	10	9	5.67	19.5	23.2	32.22	27.83	14.78	23.62	31.06	19	19	12.95	27.47	22.44	27	0	0
Film	11	8	11	12	73	87.13	76.91	87.67	16.74	21.4	24.67	18.12	19	23	78.95	82.52	19.62	21.7	8	11	8	11	32.5	58.09	24.75	43.73	32.93	28.58	24.68	27.34	19	19	47.32	35.74	32.31	27.29	0	0
Filter	10	11	11	12	72.1	75.82	88.73	80.25	31.72	20.75	15.25	25.58	21	23	74.05	84.3	25.91	21.25	9	9	10	9	1.67	8.56	21.6	24.22	18.73	9.13	20.83	28.29	18	19	5.11	22.84	14.73	23.97	0	0
Filz	10	10	12	11	54	75.3	65.58	79.09	35.53	13.86	22.89	28.63	20	23	64.65	72.04	28.43	26.12	10	9	9	10	.9	-9.33	-10.78	3.5	43.98	54.15	21	30	19	19	-3.95	-3.26	47.94	26.46	0	0
Findigkeit	10	12	12	11	19.8	4.17	23.08	31.18	27.14	6.16	22.23	29.46	22	23	11.27	26.96	19.97	25.66	9	9	9	10	28.33	12.33	37.44	32	20.52	26.84	22.25	36.75	18	19	20.33	34.58	24.59	30.05	0	0
Finger	11	10	13	10	92	94.7	97.54	93.8	13.63	6.2	3.57	10.23	21	23	93.29	95.91	10.59	7.3	10	8	8	11	18.9	20.63	25.13	37.45	27.42	34.78	29.19	30.14	18	19	19.67	32.26	29.95	29.58	0	0
Fink	10	10	12	11	65.8	78	92.92	82.64	29.42	19.99	7.62	19.93	20	23	71.9	88	25.27	15.4	9	9	10	9	16.89	20.78	54.9	46	5.06	21.82	25.75	26.87	18	19	18.83	50.68	15.5	25.95	0	0
Firma	11	9	11	12	37.27	37.78	46.91	63.75	19.91	31.04	28.02	34.1	20	23	37.5	55.7	24.78	31.82	9	10	10	9	-4.67	-6.5	21.7	6.44	33.49	20.5	23.87	28.25	19	19	-5.63	14.47	26.64	26.48	0	0
Firmament	9	10	12	11	59	58.7	73.83	69.09	30.16	22.53	26.23	29.98	19	23	58.84	71.57	25.65	27.54	9	10	9	10	33.78	32	52.78	33.8	22.99	27.44	28.71	36.34	19	19	32.84	42.79	24.74	33.49	.04	0
Fisch	11	9	12	11	90.09	88.44	96.58	90.45	10.29	15	7.17	13.39	20	23	89.35	93.65	12.3	10.82	7	11	8	11	21.86	24.91	38.88	51.09	43.49	22.88	42.94	38.65	18	19	23.72	45.95	31.27	39.81	0	0
Fischer	11	9	11	12	78.36	83.67	79.18	80.92	18.63	11.01	25.18	21.55	20	23	80.75	80.09	15.53	22.83	10	8	9	10	16.8	22.13	40.22	33.8	23.19	20.9	31	21.7	18	19	19.17	36.84	21.73	25.95	0	0
Fläche	11	9	12	11	48.09	60.33	70.08	73.09	28.08	26.55	25.52	29.41	20	23	53.6	71.52	27.4	26.85	9	9	9	10	2.33	2.78	8.44	18.1	18.8	5.26	11.95	24.66	18	19	2.56	13.53	13.4	19.8	0	0
Flagge	9	11	14	10	88.11	86.36	90.86	90	9.69	14.2	11.76	11.94	20	24	87.15	90.5	12.1	11.58	10	8	10	9	10.2	-4.75	20.8	13.22	33.01	19.11	27.2	27.48	18	19	3.56	17.21	28.03	26.84	0	0
Flamingo	11	10	13	10	88.73	92.5	94.85	84.4	12.11	7.32	8.63	24.65	21	23	90.52	90.3	10.06	17.81	9	9	9	10	36.33	46.78	66	43.6	27.79	43.22	22.84	22.76	18	19	41.56	54.21	35.66	24.96	0	0
Flamme	11	10	11	12	85.91	88.8	94	83.83	16.33	10.32	8.47	12.18	21	23	87.29	88.7	13.54	11.57	8	10	9	10	26.38	4.8	-13.11	2.4	49.74	48.15	54.15	56.03	18	19	14.39	-4.95	48.66	54.19	0	0
Flanell	11	7	11	12	42.82	71.43	59.82	84.17	29.38	20.83	30.72	22.78	18	23	53.94	72.52	29.44	29.03	10	8	9	10	13	26.38	27.89	31.7	26.78	25.1	19.9	33.1	18	19	18.94	29.89	26.19	26.97	0	0
Flasche	11	8	12	11	88.91	92.13	97.17	87.55	13.05	10.26	3.51	20.28	19	23	90.26	92.57	11.76	14.74	10	8	8	11	9.5	10.5	26.25	25.27	27.73	15.76	25.49	19.27	18	19	9.94	25.68	22.57	21.43	0	0
Flaum	10	11	10	12	61.6	73.82	73.2	69.75	34.29	16.72	23.37	32.05	21	22	68	71.32	26.61	27.84	9	9	10	9	22	14.89	20.9	28.56	33.93	43.94	26.3	27.36	18	19	18.44	24.53	38.26	26.34	0	.04
Fleck	9	11	12	10	72.89	85.18	87.83	86	27.87	18.41	13.2	17.37	20	22	79.65	87	23.34	14.88	10	8	9	10	-4.4	-22	-28.67	-34.9	16.28	15.86	40.12	32.36	18	19	-12.22	-31.95	18.02	35.34	0	0
Fledermaus	12	9	12	11	93.33	96.22	94.75	87.18	7.39	4.38	12.42	13.73	21	23	94.57	91.13	6.31	13.33	8	10	9	10	17.88	21.1	21.78	-7.8	54.02	42.28	61.61	40.35	18	19	19.67	6.21	46.37	52.26	0	0
Fleisch	10	10	14	9	85.5	90.8	90.79	91.44	11.49	7.61	12.47	10	20	23	88.15	91.04	9.87	11.33	10	8	9	10	16.6	7.5	44.67	20	27.16	22.63	30.44	32.06	18	19	12.56	31.68	24.96	32.95	0	0
Fleischer	12	8	13	9	78.83	69.63	85.85	73.33	20.28	24.11	20.66	28.05	20	22	75.15	80.73	21.76	24.15	11	8	10	10	-7.27	-29.13	21	7.9	34.03	29.43	27.26	44.54	19	20	-16.47	14.45	33.21	36.56	0	0
Fleiß	10	8	11	12	34.2	24.5	54.91	45.33	32.68	19.53	34.55	34.43	18	23	29.89	49.91	27.33	34.05	9	9	9	11	26.22	19.67	54.56	51.45	27.43	53.76	29.8	32.74	18	20	22.94	52.85	41.54	30.67	0	0
Flieder	10	11	12	11	75.7	86.09	94.67	91	22.11	15.52	8.05	8.58	21	23	81.14	92.91	19.2	8.33	10	8	9	10	32.1	36.75	59.33	57.4	12.4	25.05	27.71	18.41	18	19	34.17	58.32	18.59	22.62	0	0
Fliege	9	10	12	10	92.11	95.6	97.5	85.3	9.92	4.55	4.1	24.14	19	22	93.95	91.95	7.57	17.24	9	10	9	10	-12.89	-10.5	-16.22	-24.1	26.79	18.77	24.11	33.78	19	19	-11.63	-20.37	22.29	29.07	0	0
Fließband	10	9	13	10	72.7	76.11	82.54	75	23.61	19.5	17.63	22.1	19	23	74.32	79.26	21.23	19.59	9	9	9	10	-25.11	-43.67	-27.89	3.2	35.57	27.93	25.35	23.76	18	19	-34.39	-11.53	32.46	28.68	0	0
Flocke	9	12	12	12	82.33	79.25	87.58	85.83	13.16	15.72	17.66	22.11	21	24	80.57	86.71	14.41	19.59	9	9	10	9	22.78	36	24	30.33	27.25	32.37	15.47	25.42	18	19	29.39	27	29.81	20.43	0	0
Floh	11	9	10	12	85	79.67	81.2	84.33	20.02	28.24	26.3	23.26	20	22	82.6	82.91	23.54	24.13	10	9	10	9	-13.7	-20	-64.6	-66.56	48.62	32.92	35.8	26.16	19	19	-16.68	-65.53	40.91	30.76	0	0
Floß	9	10	13	10	86.11	82.5	94.31	87.3	15.18	17.56	5.95	15.29	19	23	84.21	91.26	16.12	11.29	10	9	10	9	31.1	25.56	35.5	22.11	20.22	27.34	28.34	12.29	19	19	28.47	29.16	23.34	22.71	0	0
Flöte	10	10	12	10	92.3	96.9	97.17	91.1	7.72	4.25	3.24	8.63	20	22	94.6	94.41	6.51	6.86	8	10	9	10	12.13	32.5	48.89	35.9	16.47	37.41	26.64	33.64	18	19	23.44	42.05	31	30.43	0	0
Flucht	10	9	12	11	56.4	28.78	48.92	61.09	28.54	21.9	27.77	31.54	19	23	43.32	54.74	28.66	29.6	9	9	9	10	-10.67	-34.11	-56.11	-66.5	42.36	44.14	37.86	24.17	18	19	-22.39	-61.58	43.67	30.94	0	0
Flug	12	8	12	11	62.25	60.13	69.08	69.27	31.31	16.49	32.28	28.45	20	23	61.4	69.17	25.86	29.82	8	10	9	10	38	32.7	22.33	44.5	54.4	43.18	31.84	32.63	18	19	35.06	34	47.04	33.35	0	0
Flugblatt	11	9	14	9	76.64	77.67	78.5	78.11	28.84	17.98	28.58	27.52	20	23	77.1	78.35	23.96	27.53	10	8	9	10	.3	-3.75	-7.44	-.2	39.12	19.69	24.29	16.87	18	19	-1.5	-3.63	31.21	20.45	0	0
Flügel	10	10	12	11	87.4	81	94.67	79.55	13.01	18.45	5.97	22.6	20	23	84.2	87.43	15.88	17.6	8	10	8	11	29.38	51.5	39.38	36.55	17.29	26.86	24.22	30.07	18	19	41.67	37.74	25.16	27.07	0	0
Flugzeug	11	10	10	13	94.45	94.3	98.9	90.46	7.22	5.87	2.33	14.61	21	23	94.38	94.13	6.45	11.7	9	10	9	10	35.44	40.6	37.67	51.3	43.16	33.54	29.12	33.87	19	19	38.16	44.84	37.38	31.61	0	0
Flur	10	10	11	11	71.6	74.3	86.55	83.27	25.44	21.69	16.78	21.39	20	22	72.95	84.91	23.05	18.84	9	9	9	10	-2.44	2.11	16.33	25.5	13.58	12.46	34.05	27.68	18	19	-.17	21.16	12.86	30.34	0	0
Fluss	12	8	11	12	80.33	89.25	96.55	91.33	21.24	12.24	5.01	9.63	20	23	83.9	93.83	18.35	8.05	8	10	9	10	50.88	43.6	36.33	33.8	33.18	25.22	33.92	23.31	18	19	46.83	35	28.36	28.02	0	0
Flut	11	10	13	10	75.73	78.7	79.85	77.4	15.24	17.62	25.64	18.87	21	23	77.14	78.78	16.07	22.49	8	10	9	10	-2.63	-33.3	-26.56	-42.5	35.35	45.37	45.58	41.9	18	19	-19.67	-34.95	43.02	43.22	0	0
Fohlen	11	10	12	11	85.82	89.6	97.83	91.09	14.96	14.52	4.37	10.82	21	23	87.62	94.61	14.51	8.64	10	9	9	10	41.4	49.89	64.78	48.5	24.5	36.82	28.75	24.38	19	19	45.42	56.21	30.36	27.1	0	0
Folge	11	10	12	10	30.73	16	31.67	38.9	30.7	16.51	34.77	33.47	21	22	23.71	34.95	25.51	33.57	10	9	10	9	21.4	4.22	9.4	3	33.6	9.19	23.66	12.47	19	19	13.26	6.37	26.07	18.97	0	0
Folie	11	10	11	11	69	86.1	80.91	76.09	32.79	15.99	28.12	28.18	21	22	77.14	78.5	27.01	27.58	10	11	9	10	4.7	3.36	14.89	9.6	21.94	9.06	10.23	22.28	21	19	4	12.11	16.07	17.38	0	0
Forderung	10	9	12	11	18.9	16.11	26.75	29.55	19.49	16.05	30.57	22.62	19	23	17.58	28.09	17.51	26.49	13	13	12	13	-33.92	-48	-24.5	-18.92	23.15	25.8	45.96	39.52	26	25	-40.96	-21.6	25.06	41.91	0	0
Forelle	8	11	12	11	86.38	86.09	96.42	89.91	14.07	12.43	4.56	10.04	19	23	86.21	93.3	12.76	8.2	10	8	10	10	35.4	21.63	59.1	43.9	18.74	25.65	38.01	25.61	18	20	29.28	51.5	22.5	32.5	0	0
Form	10	10	13	9	58	41.1	48.46	43.78	26.89	15.68	31.55	33.1	20	22	49.55	46.55	23.11	31.49	12	6	10	10	7.25	10.67	18.7	17.8	20.33	25.65	29.12	19.12	18	20	8.39	18.25	21.54	23.98	0	0
Format	10	10	11	12	41	31.5	34.64	58.58	32.91	23.09	21.75	34.62	20	23	36.25	47.13	28.1	31.05	8	10	9	10	2.88	4.7	12.33	15.6	18.99	9.7	23.07	26.94	18	19	3.89	14.05	14.11	24.54	0	0
Forscher	9	11	13	10	46	56	73.54	65	30.57	24.71	28.59	31.29	20	23	51.5	69.83	27.22	29.42	10	8	9	10	36.5	23.5	37.78	39.2	30.79	29.41	25.96	24.71	18	19	30.72	38.53	30.03	24.6	0	0
Forschung	9	10	12	11	38.33	33.3	49.67	50	25.33	19.8	21.24	34.56	19	23	35.68	49.83	22.09	27.72	8	10	8	11	42	15.7	43.88	50.64	31.09	26.22	20.64	28.58	18	19	27.39	47.79	30.7	25.12	0	0
Förster	11	10	12	12	66.09	68.3	91.33	83.17	32.47	17.63	10	15.48	21	24	67.14	87.25	25.85	13.41	9	9	10	9	7.22	21.33	55.1	32.67	18.94	34.51	18.71	23.81	18	19	14.28	44.47	27.96	23.65	0	0
Fortdauer	10	9	10	12	9	12.78	27.5	35.92	10.94	16.45	30.44	30.67	19	22	10.79	32.09	13.56	30.14	10	8	10	9	16.3	7.75	9.9	10.89	29.43	20.15	18.3	23.6	18	19	12.5	10.37	25.39	20.38	0	0
Foto	8	10	11	11	89.25	82.9	87.64	91.73	12.67	15.87	20.33	8.91	18	22	85.72	89.68	14.49	15.46	10	8	8	11	41.6	37.88	33.75	53.73	28.1	26.56	28.02	31.63	18	19	39.94	45.32	26.68	31.04	0	0
Fotograf	9	9	12	10	75.78	66.11	90.5	83.4	20.39	28.04	8.6	23.15	18	22	70.94	87.27	24.3	16.78	9	9	9	10	24	39.33	27.33	21.9	41.89	31.85	13.91	26.18	18	19	31.67	24.47	36.95	20.89	0	0
Frack	9	10	11	12	75.89	88.2	86.27	86.42	25.35	10.9	23.98	16.69	19	23	82.37	86.35	19.62	20.02	10	9	8	11	.1	10.67	21	24.73	30.28	43.62	29.26	28.48	19	19	5.11	23.16	36.52	28.05	0	0
Frage	14	15	15	17	42.43	51.13	41.6	49.18	29.15	22.48	31.47	30.99	29	32	46.93	45.63	25.82	30.95	13	13	12	13	2.31	2	26.33	25.23	35.18	37.2	37.1	36.16	26	25	2.15	25.76	35.47	35.85	0	.03
Frau	10	10	12	11	79.9	83	93.58	86.18	20.58	17.64	8.21	26.43	20	23	81.45	90.04	18.72	19.12	9	9	9	10	65.67	42.89	75.89	59.6	19.94	33.65	19.06	31.48	18	19	54.28	67.32	29.28	26.95	0	0
Freiheit	11	8	12	11	41.27	30.25	47.25	55.09	31	24.94	28.15	32.7	19	23	36.63	51	28.41	29.97	8	11	8	11	73	80.73	92.75	78	38.78	34.37	9.57	28.76	19	19	77.47	84.21	35.44	23.47	0	0
Freund	9	12	13	9	57.56	46.67	58.46	78.78	26.9	28.56	33.85	26.4	21	22	51.33	66.77	27.73	32.01	13	13	12	13	69.46	85.92	85.25	80.31	23	16.13	13.46	30.33	26	25	77.69	82.68	21.2	23.44	0	0
Frevel	14	15	15	17	36.14	19.53	43.53	40.18	26.82	18.94	27.19	30.33	29	32	27.55	41.75	24.18	28.49	10	8	8	11	-35.3	-20.25	-38.38	-65	28.43	23.22	28.63	27.46	18	19	-28.61	-53.79	26.63	30.33	0	0
Frieden	11	10	12	11	25.36	26.9	44.58	56.55	15.9	26.66	30.87	34.69	21	23	26.1	50.3	21.14	32.57	9	10	9	10	66.78	67.9	88.56	86.6	20.34	41.26	16.82	18.73	19	19	67.37	87.53	32.18	17.38	0	0
Frikassee	9	10	13	8	74.56	80.9	75.31	90.25	30.77	16.36	29.86	11.37	19	21	77.89	81	23.77	25.21	10	9	9	11	30.3	7.11	44.33	6	36.54	44.25	32.06	39.04	19	20	19.32	23.25	40.98	40.22	0	.03
Friseur	11	8	14	9	65	63.63	88.93	88.33	24.66	27.03	17.95	21	19	23	64.42	88.7	24.95	18.73	9	9	7	12	-2.56	13.44	24.71	28.58	24.5	21.04	21.98	30.35	18	19	5.44	27.16	23.63	26.97	0	0
Frist	10	10	12	11	15.7	16	42.67	35.09	13.82	18.07	32.41	28.34	20	23	15.85	39.04	15.66	30.08	8	10	8	11	-36.63	-29.8	-30.38	3.64	25.3	20.48	39.24	21	18	19	-32.83	-10.68	22.31	33.79	0	0
Frosch	14	15	15	17	96.86	97.53	97.4	91.35	3.82	3.18	4.47	11.59	29	32	97.21	94.19	3.46	9.37	10	8	9	10	29.2	16.25	29.22	14.6	26.02	13.57	31.35	21.98	18	19	23.44	21.53	21.87	27.1	0	0
Frottee	9	9	11	12	59.22	80.89	65.09	88.58	35.3	18.89	27.84	9.74	18	23	70.06	77.35	29.64	23.32	9	9	8	11	30.78	39.89	25.63	35.09	31.17	35.08	19.09	28.68	18	19	35.33	31.11	32.53	24.93	.04	0
Frucht	9	12	13	10	78.33	79.92	93.69	89.1	14.55	14.99	7.43	12.49	21	23	79.24	91.7	14.46	9.97	10	8	9	10	38.1	40.38	55.78	53.3	21.88	26.98	25.61	28.81	18	19	39.11	54.47	23.55	26.61	0	0
Frühling	11	9	11	12	62.91	57.33	88.36	72	32.51	31.34	12.09	27.79	20	23	60.4	79.83	31.27	22.86	8	11	8	11	71	73.36	83.13	79.91	28.14	24.17	17.55	13.83	19	19	72.37	81.26	25.18	15.12	0	0
Frühstück	10	10	12	11	64.3	66.8	88.5	82.27	25.89	19.22	15.86	17.13	20	23	65.55	85.52	22.23	16.41	9	9	9	10	31.56	52.33	53.67	57.7	23.01	28.77	30.62	21.31	18	19	41.94	55.79	27.44	25.46	0	0
Fuchs	10	9	13	10	91.3	95.89	94.38	85.2	10.7	7.98	7.81	15.95	19	23	93.47	90.39	9.54	12.61	9	9	9	10	30.44	12.78	28.11	-2.4	31.35	27.13	50.57	40.12	18	19	21.61	12.05	29.85	46.76	0	0
Funk	10	10	10	11	37.1	32.7	50.6	52.09	33.17	19.79	15.78	31.05	20	21	34.9	51.38	26.68	24.38	8	10	11	8	14.63	13.9	35.09	15.88	35.39	23.97	25.18	16.47	18	19	14.22	27	28.63	23.51	0	.04
Funktion	10	10	13	10	46.6	14.4	37.54	35.4	43.01	11.82	33.08	34.02	20	23	30.5	36.61	34.86	32.73	9	9	8	11	-7.56	8.67	3.5	12.45	37.54	26.66	6.85	41.29	18	19	.56	8.68	32.67	31.4	0	0
Funkturm	9	11	12	11	89.56	86.73	96.42	92.27	8.23	13.42	7.45	14.7	20	23	88	94.43	11.2	11.42	8	10	8	11	14.75	17.4	29.75	48.73	37.25	20.72	27.44	29.3	18	19	16.22	40.74	28.29	29.37	0	0
Furcht	11	9	11	12	36.64	33.89	46.45	38.17	32.64	14.8	29.01	35.19	20	23	35.4	42.13	25.59	31.93	9	9	9	10	-30.22	-60.78	-28.89	-56.2	38.68	35.9	30.05	20.57	18	19	-45.5	-43.26	39.47	28.45	0	0
Fuß	10	10	13	10	86.6	95.4	98	91	14.12	6.54	3.81	9.19	20	23	91	94.96	11.62	7.42	10	8	9	10	8.8	4	16.67	27.9	16.65	24.91	27.05	33.57	18	19	6.67	22.58	20.2	30.36	0	0
Fußball	12	10	12	11	95.08	90.7	95.33	93.55	5.98	13.24	7.36	7.37	22	23	93.09	94.48	9.94	7.25	9	9	9	10	51.11	10.11	35.78	23.8	40.27	32.79	30.21	50.17	18	19	30.61	29.47	41.4	41.26	0	0
Fußboden	8	12	12	11	74.5	77	92.75	87	21.63	19.42	10.46	18.8	20	23	76	90	19.81	14.97	11	8	8	11	5	5	12.25	16	21.66	14.14	20.68	20.12	19	19	5	14.42	18.39	19.87	0	0
Futter	10	10	10	12	67.1	62.8	79.2	80.58	15.53	16.19	22.38	22.24	20	22	64.95	79.95	15.6	21.78	9	9	8	11	19	8.33	26.13	23	31.96	21.12	18.19	29.1	18	19	13.67	24.32	26.85	24.53	0	0
Gabel	10	9	13	10	90.1	96.78	97.69	89.4	14.11	4.66	3.45	14.49	19	23	93.26	94.09	10.99	10.49	9	10	9	10	8.44	5.8	31.56	9.1	17.59	11.86	25.97	24.87	19	19	7.05	19.74	14.48	27.24	0	0
Galeere	10	10	14	9	67.4	66	89.86	77.44	25.3	33.88	12.21	24.78	20	23	66.7	85	29.11	18.7	10	7	9	10	-15.6	-47.71	-57.22	-42.2	37.67	47.34	23.09	41.03	17	19	-28.82	-49.32	43.64	33.73	.03	0
Galgen	9	11	11	12	95.33	88.45	91.73	74.83	5.24	10.76	9.97	24.66	20	23	91.55	82.91	9.21	20.59	8	10	9	10	-74.88	-74	-89.89	-83.7	15.78	36.92	18.04	22.68	18	19	-74.39	-86.63	28.71	20.3	0	0
Gang	10	11	14	9	65.8	72.55	67.57	50.67	32.52	22.89	28.05	34.13	21	23	69.33	60.96	27.38	30.98	11	9	10	9	2.82	8.56	10.7	5.33	20.17	14.75	16.8	29.55	20	19	5.4	8.16	17.73	23.17	0	0
Gans	10	10	12	11	90.2	94	96.92	89.27	15.27	6.18	4.98	18.52	20	23	92.1	93.26	11.5	13.55	8	10	8	11	27.88	17	46.88	26.18	17.13	26.81	31.32	26.65	18	19	21.83	34.89	23.07	29.77	0	0
Gänsehaut	10	11	13	10	78	81.55	83.15	87.2	24.81	14.86	18.05	10.14	21	23	79.86	84.91	19.76	14.96	9	10	9	10	23.22	-16.8	-20.22	-24.1	39.77	25.44	19.04	40.36	19	19	2.16	-22.26	38.05	31.3	0	0
Garage	11	10	12	10	74.09	89.1	93.5	89.5	23.21	7.61	10.16	13	21	22	81.24	91.68	18.83	11.43	10	8	10	9	11.8	4.5	32.3	27	29.82	6.48	29.74	28.05	18	19	8.56	29.79	22.41	28.27	0	0
Garbe	6	8	12	11	56.33	39.75	79.83	89.27	31.5	21.01	23.02	9.73	14	23	46.86	84.35	26.3	18.2	6	9	11	8	17.5	8.89	36.18	12.38	23.96	11.26	26.5	20.54	15	19	12.33	26.16	17.22	26.46	.32	0
Gardine	9	11	13	9	79.78	89.82	92.23	91	26.93	11.61	13.08	7.78	20	22	85.3	91.73	20.07	11.01	7	11	8	11	0	-3.45	34.63	33	20.1	14.6	34.66	31.27	18	19	-2.11	33.68	16.46	31.8	0	0
Garn	12	9	12	10	71	78	79.5	87.9	17.39	19.73	26.73	23.45	21	22	74	83.32	18.29	25.07	10	9	11	8	11.7	-4.22	13.82	21.75	13.89	14.97	15.23	25.67	19	19	4.16	17.16	16.21	20.03	0	0
Garten	9	11	12	11	76.78	82.64	92.5	91.64	20.38	17.33	10.21	7.97	20	23	80	92.09	18.49	9.01	10	8	10	9	46.4	47.75	55.9	52.22	24.08	25.81	23.79	23.17	18	19	47	54.16	24.12	22.92	0	0
Gärtner	11	9	12	11	66.36	73.78	91.25	87.91	24.46	23.42	14.4	11.89	20	23	69.7	89.65	23.67	13.08	8	10	9	10	23.88	29.8	45.44	46.4	22.88	26.58	18.01	27.97	18	19	27.17	45.95	24.47	23.14	0	0
Gärtnerei	12	9	12	10	67.33	69.33	92.58	73.6	28.37	21.84	8.61	20.79	21	22	68.19	83.95	25.19	17.82	10	8	7	12	20	35.5	38.86	43.33	16.01	32.47	20.5	29.2	18	19	26.89	41.68	25.16	25.81	0	0
Gasse	11	9	13	10	78.82	73.33	95.15	84.6	25.23	22.92	6.87	18.97	20	23	76.35	90.57	23.75	14.2	9	10	9	10	22.56	7.8	18.56	13.8	39.07	53.73	24.24	18.78	19	19	14.79	16.05	46.68	21.06	0	0
Gast	12	8	11	12	53.08	42.13	69.18	78.5	36.03	23.21	28.29	22.13	20	23	48.7	74.04	31.31	25.13	9	9	8	11	24.33	42.67	47.63	57.91	17.85	35.55	23.79	23.33	18	19	33.5	53.58	28.87	23.45	0	0
Gaul	11	10	13	10	78	81.6	90.54	94.5	19.26	15.93	13.46	5.44	21	23	79.71	92.26	17.41	10.72	9	10	10	9	-7.22	-14	13.5	9.44	24.28	14.27	42.61	30.11	19	19	-10.79	11.58	19.39	36.26	0	0
Gaumen	11	10	11	12	71.91	77.5	78.73	80.17	26.35	19.47	24.02	17.46	21	23	74.57	79.48	22.93	20.38	10	8	9	10	11.4	9.5	14.44	22.4	24.03	24.72	22.41	24.98	18	19	10.56	18.63	23.63	23.49	0	0
Gazelle	11	10	13	10	85.55	74.5	92.46	76.5	12.49	25.65	10.94	21.55	21	23	80.29	85.52	20.15	17.91	9	9	9	10	33.11	48.78	54.22	42.2	21.33	31.64	16.94	24.91	18	19	40.94	47.89	27.39	21.81	0	0
Gebäude	12	9	10	12	72	71.44	95.1	88.17	19.69	19.3	8.66	12.09	21	22	71.76	91.32	19.03	11.01	8	10	9	10	6.13	6.9	27	25.4	12.87	15.54	21.6	26.56	18	19	6.56	26.16	14.01	23.68	0	0
Gebet	9	11	13	10	43	41.82	54.85	62.2	34.88	27.62	35.62	36.94	20	23	42.35	58.04	30.24	35.55	9	9	9	10	-11.89	11.22	55.67	32.2	46.99	23.23	37.55	56.89	18	19	-.33	43.32	37.87	48.88	0	0
Gebiet	9	11	12	11	49.67	34.55	66.08	60.73	23.69	23.16	26.36	29.19	20	23	41.35	63.52	24.04	27.24	9	10	9	10	8.11	5	4.33	14.4	27.11	20.43	11.1	16.95	19	19	6.47	9.63	23.19	15	0	0
Gebirge	11	10	12	11	85.18	86.1	91.83	88	10.26	8.89	10.76	16.5	21	23	85.62	90	9.4	13.62	11	7	10	9	41.91	54.43	66.6	43.33	28.79	47.34	25.96	44.07	18	19	46.78	55.58	36.31	36.64	0	0
Gebiss	8	13	14	9	87.75	86.77	93.57	88.78	14.71	15.05	9.29	19.27	21	23	87.14	91.7	14.55	13.84	11	7	10	9	-8.55	-7.71	-2.7	-6.56	22.58	19.69	45.01	50.01	18	19	-8.22	-4.53	20.9	46.13	0	0
Geburt	9	11	11	12	63.44	69.55	61.64	86.83	26.79	24.15	37.12	12.7	20	23	66.8	74.78	24.88	29.54	8	10	9	10	30.75	30.1	58.89	59.2	44.85	62.01	45.55	18.42	18	19	30.39	59.05	53.52	33.04	0	0
Geburtstag	11	10	12	11	57.36	36	64.67	77.73	28.18	20.63	32.93	29.55	21	23	47.19	70.91	26.61	31.36	8	10	10	9	59	53.5	55.7	56	19.14	46.53	32.39	25.78	18	19	55.94	55.84	36.12	28.64	0	0
Gedächtnis	9	11	12	11	23.33	17.82	35	40.55	28.08	17.54	30.82	38.42	20	23	20.3	37.65	22.4	33.97	9	10	11	8	33.22	46	45.45	48.25	30.9	32.4	38.3	27.83	19	19	39.95	46.63	31.5	33.44	0	0
Gedanke	9	11	11	12	22.89	30.64	28.36	35.75	24.17	18.11	29.35	35.57	20	23	27.15	32.22	20.84	32.22	9	9	9	10	44.44	33.78	34	53.9	29.88	35.01	31.69	21.76	18	19	39.11	44.47	32.05	28.06	0	0
Gedicht	11	10	11	11	56.45	50.9	45.73	75.73	31.26	27.29	26.37	27.25	21	22	53.81	60.73	28.84	30.34	9	10	9	10	50.78	47.9	29.44	47.9	28.72	31.25	26.29	26.28	19	19	49.26	39.16	29.27	27.24	0	.03
Geduld	12	9	12	11	20.17	12	38.75	40.45	22.64	9.79	33.16	30.71	21	23	16.67	39.57	18.37	31.3	9	9	8	11	25	30.78	43	52.27	35.78	51.36	28.12	28.47	18	19	27.89	48.37	43.04	27.93	0	0
Gefahr	10	11	13	10	37.4	23.82	34	48.2	22.75	18.06	29.54	35.2	21	23	30.29	40.17	21.08	32.17	9	10	9	10	-53.78	-63.5	-55.78	-66.1	28.22	29.18	29.46	25.12	19	19	-58.89	-61.21	28.36	27	0	0
Gefährdung	11	10	11	12	25.45	16.9	35.82	33.25	24.68	14.1	33.27	36.84	21	23	21.38	34.48	20.32	34.4	8	11	8	11	-47.25	-42.18	-54.5	-58.09	13.42	31.03	30.85	32.17	19	19	-44.32	-56.58	24.73	30.79	0	0
Gefängnis	10	9	12	11	83.2	80.78	86.75	80.64	19.05	13.32	14.56	18.29	19	23	82.05	83.83	16.18	16.36	13	13	12	13	-64.92	-58.85	-83.33	-67.69	27.01	50.54	31.35	50.72	26	25	-61.88	-75.2	39.82	42.43	0	0
Gefäß	11	9	11	11	70.18	72.78	77.27	86.45	19.85	20.91	29.56	15.72	20	22	71.35	81.86	19.83	23.58	9	9	8	11	12	3.11	19.5	25.18	18.67	9.97	26.43	21.85	18	19	7.56	22.79	15.22	23.35	0	0
Gefüge	9	11	13	10	28	22.64	33.54	37.6	26.83	16.3	33.7	25.76	20	23	25.05	35.3	21.22	29.92	9	9	9	10	4.67	-6	1.89	7.4	23.75	30.56	12.52	16.4	18	19	-.67	4.79	27.11	14.57	0	0
Gegenteil	11	9	13	9	18.55	18.67	34.38	28.33	26.44	24.03	33.31	31.2	20	22	18.6	31.91	24.72	31.85	10	8	9	10	-6.6	.38	-14.67	-10.7	19.93	10.82	33.86	22.29	18	19	-3.5	-12.58	16.47	27.6	0	0
Gegenwart	9	10	10	12	26.56	14.4	24.9	48.83	27.77	17.04	28.59	32.92	19	22	20.16	37.95	22.95	32.66	9	9	9	11	-1.11	22.56	-.56	34	44.43	29.5	22.29	28.43	18	20	10.72	18.45	38.56	30.75	0	0
Gehalt	10	11	11	12	36.9	21.09	55	69.75	32.23	16.26	31.5	30.81	21	23	28.62	62.7	25.79	31.34	8	10	10	9	16	36.9	57.1	59.44	42.78	49.87	30.25	30.39	18	19	27.61	58.21	46.74	29.48	0	0
Gehege	13	8	11	12	64.92	79.88	81.73	80.42	24.31	17.41	20.6	17.01	21	23	70.62	81.04	22.72	18.38	9	10	9	10	-12.67	-6	11.44	14.6	26.97	29.5	28.35	22.2	19	19	-9.16	13.11	27.75	24.62	0	0
Gehirn	10	11	12	10	91.3	81.73	80.58	77.8	10.07	19.29	25.23	23.55	21	22	86.29	79.32	15.99	23.94	9	9	11	9	22.11	3	52	35.22	30.78	23.72	38.73	36.34	18	20	12.56	44.45	28.42	37.67	0	0
Geier	10	10	12	11	86	82.5	92.92	85.64	13.39	24.98	10.16	12.56	20	23	84.25	89.43	19.59	11.71	9	9	10	9	-32.22	-20.11	11.7	-33.56	41.19	37.27	61.2	55.91	18	19	-26.17	-9.74	38.61	61.65	0	0
Geige	10	9	13	10	93.4	95	95.77	92	7.86	5.83	5.2	10.19	19	23	94.16	94.13	6.83	7.8	10	9	8	11	44	31.78	46.13	46.91	33.73	29.66	28.09	40.39	19	19	38.21	46.58	31.61	34.83	0	0
Geisel	11	9	12	11	67.45	62.67	63.25	88.91	23.63	21.17	25.64	11.17	20	23	65.3	75.52	22.1	23.61	9	10	10	9	-70.22	-75.3	-86.8	-79.44	28.94	25.76	21.03	18.65	19	19	-72.89	-83.32	26.66	19.75	0	0
Geist	12	8	10	12	56.58	66.5	60	43.58	28.21	38.36	29.91	31.1	20	22	60.55	51.05	32.06	30.98	9	9	10	9	18.22	21.67	23.9	1.44	16.63	48.98	47.96	52.99	18	19	19.94	13.26	35.53	50.31	0	0
Geiz	10	10	11	11	32.1	21.9	36.36	40.64	27.51	18.86	36.9	33.84	20	22	27	38.5	23.54	34.62	9	9	10	9	-61.67	-50.78	-66.6	-50.44	27.16	31.51	25.95	16.27	18	19	-56.22	-58.95	29.09	22.87	0	0
Geklapper	10	10	12	11	43.5	40.3	62.58	36.64	35.18	26.1	37.59	31.91	20	23	41.9	50.17	30.19	36.67	9	9	9	10	-32.22	-14.44	-27.89	-28.7	29.27	27.63	33.49	19.2	18	19	-23.33	-28.32	29.09	26.13	0	0
Geländer	10	10	11	11	76.9	84.8	93.45	79.55	19.85	18.51	8.58	22.54	20	22	80.85	86.5	19.11	18.1	11	8	9	10	12.73	1.63	27.22	26.1	15.15	17.44	22.9	37.02	19	19	8.05	26.63	16.66	30.31	0	0
Geld	10	9	12	10	75.5	81.67	91.83	90	18.62	23.13	8.26	12.62	19	22	78.42	91	20.52	10.24	10	8	9	10	8.9	30.25	53.56	52	42.1	25.38	36.71	27.43	18	19	18.39	52.74	36.37	31.23	0	0
Geldstück	11	9	12	11	85.91	87.33	95.75	91.91	11.58	10.05	6.51	12.38	20	23	86.55	93.91	10.66	9.73	9	9	9	10	20.78	16.89	47	38.7	34.61	26.19	38.4	33.17	18	19	18.83	42.63	29.84	34.98	0	0
Gelee	10	10	13	10	70.6	67.6	80.31	80.8	28.46	23.36	19.76	22.54	20	23	69.1	80.52	25.39	20.52	10	8	10	9	-5.6	13.5	37.7	47.11	21.39	19.66	31.86	21.87	18	19	2.89	42.16	22.29	27.27	0	0
Gelenk	10	12	13	9	76.5	78.75	95.15	81	19.27	17.75	6.28	25.55	22	22	77.73	89.36	18.04	17.95	10	9	9	10	-2.1	-7.11	24	18.4	30.75	11.01	33.18	19.32	19	19	-4.47	21.05	23.09	26.16	0	0
Gemälde	12	8	10	12	67.58	82.13	94.5	88.83	24.02	14.83	5.34	11.49	20	22	73.4	91.41	21.64	9.47	11	7	8	11	33	34.57	31.13	58.64	28.32	42.46	18.76	33.19	18	19	33.61	47.05	33.3	30.72	0	0
Gemse	11	10	13	10	75.82	74.6	91.54	86.7	21.99	17.18	12.19	22.05	21	23	75.24	89.43	19.37	16.91	10	8	8	11	20.6	16.75	45.88	33.64	19.17	17.18	29.44	23.54	18	19	18.89	38.79	17.88	26.14	0	0
Gemüse	10	11	12	12	71	85.91	89.83	82.25	23.29	14.36	13.72	17.02	21	24	78.81	86.04	20.13	15.61	9	9	9	10	35	46.89	53.33	60.8	23.07	39.21	26.68	27.94	18	19	40.94	57.26	31.8	26.86	0	0
Gemüt	12	8	13	10	12.67	25.5	25.77	37.3	11.05	26.28	28.64	32.8	20	23	17.8	30.78	19.15	30.36	10	9	8	11	8	15.78	27.75	12.64	23.73	17.95	25.83	20.1	19	19	11.68	19	20.99	23.3	0	0
General	11	9	11	12	70.09	61.56	85.18	72	29.71	10.88	15.08	32.85	20	23	66.25	78.3	23.1	26.23	10	8	9	10	-34.5	-41.75	-35.44	.6	53.74	39.54	39.95	34.44	18	19	-37.72	-16.47	46.76	40.55	0	0
Genesung	12	9	13	10	24.83	24.11	36.85	59.1	26.65	19.87	28.7	32.6	21	23	24.52	46.52	23.43	31.8	9	9	11	8	49.56	62.89	79.91	64.88	12.37	27.73	25.68	26.7	18	19	56.22	73.58	21.93	26.49	0	0
Genick	9	10	13	10	70.11	76.6	85.62	89	24.36	18.56	21.98	12.64	19	23	73.53	87.09	21.15	18.22	10	8	9	10	-7.3	-22.38	18.78	5.3	30.38	25.29	30.95	28.28	18	19	-14	11.68	28.48	29.55	0	0
Genuss	10	10	13	10	34.3	31.9	51.38	55.2	28.49	26.47	30.15	33.43	20	23	33.1	53.04	26.79	30.93	7	11	8	11	61.29	65.64	42.88	57.64	32.38	23.14	25.96	36.07	18	19	63.94	51.42	26.26	32.27	0	0
Gepard	10	10	12	11	89.4	87.6	95.08	86.09	10.54	13.33	6.83	14.24	20	23	88.5	90.78	11.73	11.69	8	11	10	9	34.25	28.45	13.2	4.22	10.93	25.17	60.46	35.3	19	19	30.89	8.95	20.17	49.02	0	0
Gerät	9	11	12	11	46	61.55	59.58	60.82	32.39	23.83	32.32	34.57	20	23	54.55	60.17	28.35	32.65	9	9	11	8	8.67	-.22	16.18	15.88	18.47	5.02	22.1	20.22	18	19	4.22	16.05	13.9	20.75	0	0
Gericht	10	10	11	12	75.8	65.7	73.91	70.58	25.81	16.21	19.95	31.19	20	23	70.75	72.17	21.61	25.89	9	9	9	11	-4.33	.56	-24.33	-19.18	50.2	37.12	42.84	57.62	18	20	-1.89	-21.5	42.9	50.27	0	0
Geröll	9	10	11	12	67.33	75.6	82.73	79.42	32.51	15.72	19.86	21.3	19	23	71.68	81	24.72	20.23	10	8	9	10	-23	-16	-16.67	-36.2	38.63	26.96	32.17	29.25	18	19	-19.89	-26.95	33.2	31.43	0	0
Gerte	9	11	12	10	65.78	70.91	79.25	81.8	21.11	26.8	33.05	17.66	20	22	68.6	80.41	23.92	26.6	7	10	9	10	-9.14	-20	-5.56	3.6	17.96	23.74	21.2	22.4	17	19	-15.53	-.74	21.64	21.74	.04	0
Geruch	9	12	12	11	30.56	30.67	30	49	26.08	28.02	33.29	32.98	21	23	30.62	39.09	26.53	33.8	7	11	8	11	-13.43	12.55	7.75	10.45	48.51	34.28	13.17	34.43	18	19	2.44	9.32	41.13	26.98	0	0
Gerüst	11	8	11	12	79.36	83.5	94.09	86.17	14.14	13.3	10.91	16.58	19	23	81.11	89.96	13.58	14.42	9	10	9	10	-1.67	-2.5	4.22	-22	16.7	15.36	18.42	25.48	19	19	-2.11	-9.58	15.56	25.62	0	0
Geschäft	11	9	11	12	56.09	54.78	76.55	80.25	29.29	24.59	20.79	22.33	20	23	55.5	78.48	26.58	21.2	9	9	10	9	18.89	-.78	17.2	28.44	32.03	16.97	13.5	31.13	18	19	9.06	22.53	26.84	23.56	0	0
Geschenk	10	9	12	10	68.1	83.78	60.67	73	22.72	12.65	29.42	28	19	22	75.53	66.27	19.85	28.79	10	8	10	10	62.1	56.75	52.2	60.9	23.15	33.14	23.21	25.78	18	20	59.72	56.55	27.27	24.29	0	0
Geschichte	14	15	15	17	44.64	54.47	65.27	56.35	21.7	19.18	24.86	23.18	29	32	49.72	60.53	20.68	24.02	10	9	8	11	32.7	31.44	27.63	25.36	25.09	30.62	35.91	36.21	19	19	32.11	26.32	27.05	35.09	0	0
Geschick	12	8	12	11	19.08	19.63	36.42	51.27	12.04	18.51	31.77	32.61	20	23	19.3	43.52	14.5	32.33	9	9	11	8	29.11	44.33	46.27	34.88	25.59	28.06	34.37	28.03	18	19	36.72	41.47	27.2	31.55	0	0
Geschirr	11	10	13	10	80.36	89.2	93.15	91.7	19.38	9.57	8.74	5.98	21	23	84.57	92.52	15.79	7.54	9	10	9	10	-17.22	4.2	22.11	38	33.41	10.55	17.3	32.75	19	19	-5.95	30.47	25.93	27.12	0	0
Geschöpf	11	8	12	11	37.27	37.75	43.33	73.27	30.74	24.97	28.44	27.83	19	23	37.47	57.65	27.7	31.47	10	8	10	11	25.4	49	31.9	30.64	24.45	33.43	21.66	31.99	18	21	35.89	31.24	30.37	26.89	0	0
Geschoss	11	10	11	12	61.55	54.2	76.18	70.83	24.14	10.88	22.71	32.9	21	23	58.05	73.39	18.94	27.98	8	11	10	9	-9.5	-23.55	-49.6	-44.89	45.14	35.09	40.69	52.66	19	19	-17.63	-47.37	39.08	45.45	0	0
Geschrei	10	10	13	10	53.4	40	45.38	46.1	38.09	24.89	38.1	32.11	20	23	46.7	45.7	32.06	34.84	9	9	9	10	-35.33	-38.56	-29.89	-57.5	33.87	24.58	24.69	29.93	18	19	-36.94	-44.42	28.76	30.32	0	0
Gesetz	10	11	11	12	27.6	15.45	40.73	55.08	25.99	15.43	34.32	35.1	21	23	21.24	48.22	21.49	34.72	9	9	9	10	-5.78	3.22	29.78	19.9	41.6	29.87	31.62	18.27	18	19	-1.28	24.58	35.43	25.24	0	0
Gesicht	11	10	13	10	81.55	81.4	93	89.7	22.51	16.98	7.66	10.97	21	23	81.48	91.57	19.57	9.16	9	9	8	11	37	40.11	31.75	34	35.47	36.45	30.48	31.3	18	19	38.56	33.05	34.93	30.12	0	0
Gespenst	10	11	11	12	83.3	86.36	67.55	63.42	9.94	14.73	34.73	32.33	21	23	84.9	65.39	12.47	32.8	11	8	11	8	-3	-2.88	-48	-56	40.89	45.13	38.34	25.77	19	19	-2.95	-51.37	41.49	33.04	0	0
Gespräch	11	8	12	11	47.55	53.88	47.08	53.18	32.32	22.85	38.15	31.92	19	23	50.21	50	28.17	34.65	9	9	9	10	20	28.56	37.56	49.7	40.22	40.84	32.13	34.56	18	19	24.28	43.95	39.56	33.09	0	0
Gestalt	11	8	11	12	52.55	48.25	58.73	69.5	26.01	18.01	36.36	31.64	19	23	50.74	64.35	22.51	33.64	8	11	9	10	7.63	7.09	12.22	18.9	44.69	34.07	27.91	26.98	19	19	7.32	15.74	37.71	26.87	0	0
Gestaltung	9	10	11	12	29.22	22.9	41.82	47.58	25.43	22.22	39.98	30.44	19	23	25.89	44.83	23.34	34.62	10	8	10	10	12.9	28.25	26.6	17.8	24.66	25.54	23.24	27.98	18	20	19.72	22.2	25.54	25.44	0	0
Gestank	12	9	11	12	51.75	38.78	37.36	42	33.28	33.4	38.01	34.95	21	23	46.19	39.78	33.15	35.68	9	9	9	10	-56.89	-51.11	-56.67	-74.1	22.92	33.27	33.28	24.58	18	19	-54	-65.84	27.87	29.57	0	0
Geste	9	9	12	10	50.78	40.89	49.83	50.1	32.91	23.32	28.86	37.71	18	22	45.83	49.95	28.13	32.34	9	10	10	9	29	24	16.5	27.33	25.42	25.14	22.79	32.02	19	19	26.37	21.63	24.7	27.32	0	0
Gesundheit	9	11	14	8	39.11	17.91	51.21	63.13	27.53	15.98	36.18	33.13	20	22	27.45	55.55	23.89	34.79	13	13	12	13	42.85	49.38	89.83	74.38	38.39	47.45	14.3	42.39	26	25	46.12	81.8	42.42	32.47	0	0
Getränk	12	8	12	11	72.75	73.5	78.42	81.73	14.78	17.57	18.47	14.37	20	23	73.05	80	15.5	16.35	10	9	9	10	37.5	31.11	55.22	50.7	19.85	37.46	31.36	22.57	19	19	34.47	52.84	28.83	26.41	0	0
Getreide	10	9	13	10	74.8	75.89	91.23	90	16.36	21.01	9.28	12.72	19	23	75.32	90.7	18.17	10.65	10	9	9	10	25	27.44	37.11	28.2	22.44	35.3	17.62	23.94	19	19	26.16	32.42	28.41	21.1	0	0
Gewalt	10	11	12	11	50.2	54	34.5	62.18	33.15	29.12	32.2	30.5	21	23	52.19	47.74	30.37	33.78	10	8	9	10	-67.7	-74.13	-85.22	-86.8	28.84	31.62	18.01	19.42	18	19	-70.56	-86.05	29.38	18.26	0	0
Gewand	10	10	13	9	69.9	67.2	80.08	84.67	25.4	20.06	29.82	13.37	20	22	68.55	81.95	22.32	24.12	9	9	11	8	11.67	30.11	30.55	29.75	11.41	31.37	25.75	34.62	18	19	20.89	30.21	24.79	28.89	0	0
Gewässer	9	10	12	12	68.33	64.8	84.33	88.83	24.58	17.92	14.23	14.1	19	24	66.47	86.58	20.8	14.04	6	12	10	9	44.33	32.92	46.1	27.56	8.31	33.53	28.04	35.48	18	19	36.72	37.32	27.9	32.3	0	0
Gewehr	8	11	12	11	91.63	89.55	95.33	81	13.22	11.08	7.83	26.27	19	23	90.42	88.48	11.72	19.95	8	11	9	10	-21.13	-56	-58.67	-74.6	46.97	40	39.32	20.9	19	19	-41.32	-67.05	45.39	31.18	0	0
Geweih	12	9	12	11	83.33	92.22	92.5	87.73	14.58	9.4	13.73	14.33	21	23	87.14	90.22	13.14	13.91	8	11	9	10	-6.75	20.45	41.33	28.2	27.3	24.91	32.19	27.97	19	19	9	34.42	28.72	29.95	0	0
Gewicht	10	10	11	11	41.5	48	49.36	63.18	32.21	25.52	35.24	34.6	20	22	44.75	56.27	28.48	34.81	9	9	9	10	-9.11	-30	-4.78	7.6	13.95	47.64	20.3	32.65	18	19	-19.56	1.74	35.71	27.51	0	0
Gewitter	12	8	12	10	78.17	76.75	89.5	79.9	24.06	18.3	14.9	19.4	20	22	77.6	85.14	21.42	17.36	10	9	10	9	24.1	18.67	-29.6	-32.67	41.69	37.88	37.62	27.16	19	19	21.53	-31.05	38.92	32.22	0	0
Gewürz	10	12	12	11	64	68.33	76.42	78	28.67	15.56	20.67	25.2	22	23	66.36	77.17	22	22.42	9	9	10	9	41.33	33.44	39.8	47.33	21.62	21.42	26.19	15.12	18	19	37.39	43.37	21.27	21.44	0	0
Giebel	10	10	13	9	66.9	64.9	88.23	86.44	31.71	25.61	15.64	14.9	20	22	65.9	87.5	28.07	15.01	9	9	8	11	21.33	6.22	17.38	14.82	32.41	12.31	9.15	19.38	18	19	13.78	15.89	25.02	15.59	0	0
Gier	10	10	12	10	40.5	25.5	42.58	44.3	30.96	23.32	29.67	30.51	20	22	33	43.36	27.77	29.34	11	8	10	9	-60.27	-71.38	-72.1	-59	23.01	28.22	24.29	28.17	19	19	-64.95	-65.89	25.21	26.32	0	0
Gift	11	11	11	12	69.45	53.45	54.64	58.92	27.71	27.31	42.58	22.75	22	23	61.45	56.87	28.07	32.98	10	8	9	11	-47.6	-55.25	-64.11	-88.09	28.54	41.4	24.96	16.66	18	20	-51	-77.3	33.94	23.63	0	0
Gigant	10	10	13	10	55.5	45.4	55.69	58	27.6	34.86	26.69	27.87	20	23	50.45	56.7	31.04	26.6	9	9	10	9	9	1.11	-8.4	-12	32.15	42.36	38.96	40.13	18	19	5.06	-10.11	36.7	38.45	0	0
Ginster	11	7	11	11	39	72.71	76.82	80.91	30.93	23.69	33.64	21.43	18	22	52.11	78.86	32.35	27.6	8	9	10	9	17.38	15	51.9	38	21.2	18.13	36	27.44	17	19	16.12	45.32	19.04	32.15	.07	.04
Gipfel	8	11	11	12	90.13	84.82	89.64	81.58	7.74	10.68	8.98	23.53	19	23	87.05	85.43	9.69	18.18	10	9	10	9	35.1	36.44	64.7	19	43.55	33.21	30.27	54.12	19	19	35.74	43.05	37.93	48.06	0	0
Gips	11	10	13	10	76.09	76.8	84.15	77.9	18.06	15.52	14.89	28.54	21	23	76.43	81.43	16.48	21.55	11	8	8	11	2.36	-12.88	10.75	-5.27	24.94	25.59	16.49	23.15	19	19	-4.05	1.47	25.69	21.67	0	0
Giraffe	12	9	12	11	91.83	93.22	93.5	94.45	9.2	8.18	10.48	7.75	21	23	92.43	93.96	8.59	9.08	10	9	9	10	32.8	42.89	42.56	44.3	24.67	34.55	21.66	24.66	19	19	37.58	43.47	29.35	22.66	0	0
Girlande	10	9	11	11	74	79.44	90.82	80.27	21.89	17.39	14.63	21.16	19	22	76.58	85.55	19.54	18.55	9	9	10	9	11	38.78	33.5	22.33	20.92	37.33	24.87	29.35	18	19	24.89	28.21	32.65	26.93	0	0
Gitarre	10	9	14	9	92.8	94.22	93.93	90.89	9.35	6.22	9.3	9.09	19	23	93.47	92.74	7.84	9.14	10	9	10	9	43.7	50.67	39.7	54.67	36.97	37.2	24.6	33.04	19	19	47	46.79	36.21	29.1	0	0
Gitter	12	8	12	11	78.58	89.25	91.67	82.36	18.01	10.67	11.44	24.05	20	23	82.85	87.22	16.08	18.73	11	8	11	8	-46.18	-30.63	-25.45	-26.13	28.36	33.5	21.69	24.6	19	19	-39.63	-25.74	30.75	22.29	0	0
Glas	10	10	11	12	83.4	93.1	93.55	83.75	28.54	9.86	12.39	19.72	20	23	88.25	88.43	21.37	17.01	10	8	9	10	9.2	13.13	18.56	17.6	18.11	16.36	14.04	32.03	18	19	10.94	18.05	16.97	24.51	0	0
Glatze	10	10	12	11	87.3	91.2	93.5	87.73	15.22	9.92	11.37	24.44	20	23	89.25	90.74	12.66	18.57	10	9	9	10	-35.6	-25.44	-36.56	-14.9	33.86	26.54	43.39	28.59	19	19	-30.79	-25.16	30.22	37	0	0
Glaube	10	10	11	12	39.3	18.7	34.82	39.33	29.77	17.08	29.88	34.42	20	23	29	37.17	25.88	31.68	10	9	9	10	5	31.44	52.11	17.7	53.49	36.71	37.1	30.64	19	19	17.53	34	47.05	37.32	0	0
Gleichnis	12	9	12	11	25.33	25.89	37.08	44.64	25.13	25.42	35.09	34.93	21	23	25.57	40.7	24.61	34.42	9	9	10	9	6.11	7	29	20.89	44.46	14.91	25.44	28.55	18	19	6.56	25.16	32.17	26.52	0	0
Gleichung	10	10	12	11	58.2	47.9	57.25	58.45	45.65	27.43	33.44	31.43	20	23	53.05	57.83	37.04	31.75	9	9	9	10	-3.22	1.33	1.22	6	39.23	13.18	21.98	18.86	18	19	-.94	3.74	28.49	19.96	0	0
Gleis	10	10	10	13	83.8	86.3	91.3	86.31	14.84	16.92	12.3	14.95	20	23	85.05	88.48	15.54	13.79	8	11	9	10	10.38	4.09	24.44	16.7	17.08	31.35	34.37	20.6	19	19	6.74	20.37	25.88	27.44	0	0
Gletscher	9	11	12	11	84	84.27	91.58	89.73	17.34	15.12	12.11	9.88	20	23	84.15	90.7	15.72	10.89	10	9	10	9	31.3	16	26.9	-3.89	34.32	26.78	41.13	45.7	19	19	24.05	12.32	31.13	44.98	0	0
Globus	8	12	13	10	94.5	87.75	92	87	4.44	14.87	11.11	21.41	20	23	90.45	89.83	12.12	16.16	10	9	10	9	32.2	33.89	41.1	33.89	25.44	28.05	33.36	33.48	19	19	33	37.68	25.96	32.69	0	0
Glocke	9	11	13	10	88.22	96.82	96.08	85.9	15.17	3.49	4.15	18.65	20	23	92.95	91.65	11.07	13.35	9	10	10	9	19.56	21	42.5	47.78	33.1	29.03	26.83	29.71	19	19	20.32	45	30.15	27.56	0	0
Glück	11	10	10	13	40.73	30	34	44.38	36.69	22.91	33.31	29.72	21	23	35.62	39.87	30.65	31.04	10	9	9	10	79.8	71.78	75.22	79	23.67	23.64	28.24	21.78	19	19	76	77.21	23.36	24.4	0	0
Glucke	9	11	13	10	59.44	59.64	80.15	74.4	37.75	25.11	31.55	28.87	20	23	59.55	77.65	30.53	29.87	10	8	11	8	-29.8	-11.75	34.64	18.5	40.53	24.02	28.77	31	18	19	-21.78	27.84	34.53	30.01	.04	0
Glühbirne	11	10	13	10	85.73	93.8	93.77	94.9	15.89	10.36	7.08	5.02	21	23	89.57	94.26	13.84	6.17	8	11	10	9	15.88	5.82	29.9	16.33	16.39	6.88	24.33	11.55	19	19	10.05	23.47	12.52	20.09	0	0
Glut	10	10	13	10	80.4	82.2	76.15	84.6	26.1	13.11	25.24	21.25	20	23	81.3	79.83	20.13	23.46	10	9	9	10	22.8	6.33	-10	-24.9	25.85	35.13	39.5	42.33	19	19	15	-17.84	30.89	40.59	0	0
Gnade	9	10	11	12	42.33	19.1	38.64	33.67	37.54	17.1	34.84	30.83	19	23	30.11	36.04	30.24	32.15	9	10	9	10	30.22	5.9	41	41.4	51.83	36.91	22.13	30.43	19	19	17.42	41.21	45.06	26.09	0	0
Gnom	10	10	12	10	64.7	68.7	70.5	60.1	22.12	26.3	32.67	34.75	20	22	66.7	65.77	23.74	33.24	10	8	9	10	-21.5	2.63	-32	-3.7	38.66	30.58	30.52	33.71	18	19	-10.78	-17.11	36.45	34.54	0	0
Gold	9	11	10	12	76.33	85.55	84.8	88.33	34.62	16.25	14.93	9.3	20	22	81.4	86.73	25.8	12	10	8	8	11	30.5	49	48.38	47.82	42.93	30.25	41.36	46.7	18	19	38.72	48.05	37.97	43.32	0	0
Goldfisch	10	10	12	11	84.8	95	97.83	87.73	17.12	8.45	3.38	18.06	20	23	89.9	93	14.14	13.44	9	9	12	7	14.67	29.22	45	38.86	32.56	34.42	26.3	36.61	18	19	21.94	42.74	33.35	29.64	0	0
Gondel	10	11	13	10	71.7	89	92.85	81.7	21.17	9.73	11.57	19.47	21	23	80.76	88	18.09	16.12	9	10	9	10	-7	33.2	24	41.6	33.29	38.83	24.81	24.36	19	19	14.16	33.26	40.89	25.53	0	0
Gönner	10	9	13	10	40	29.22	46.38	57.5	34.68	19.04	34.53	29.16	19	23	34.89	51.22	28.16	32.09	9	9	10	9	-.22	11.11	27.9	24.11	48.08	28.39	44.42	40.51	18	19	5.44	26.11	38.74	41.47	0	0
Gorilla	12	8	12	11	92.08	86.75	96.08	90.36	8.01	13.36	5.99	12.93	20	23	89.95	93.35	10.49	10.12	9	9	11	9	13.78	10.44	13	-.89	30.12	34.95	54.19	39.4	18	20	12.11	6.75	31.7	47.43	0	0
Gott	12	9	13	9	33.75	27.11	55.31	56.11	36.86	30.28	38.63	42.44	21	22	30.9	55.64	33.55	39.23	9	10	9	10	-11.89	14.5	65.56	40.5	68.96	38.19	34.17	51.71	19	19	2	52.37	55.01	44.96	0	0
Göttin	9	10	14	9	70.89	59.7	55.07	57.67	31.32	35.83	33.29	30.97	19	23	65	56.09	33.33	31.7	10	9	7	12	32.2	25.89	36.86	24.42	62.06	57.67	35.87	27.88	19	19	29.21	29	58.43	30.69	0	0
Grab	10	10	13	10	85.5	86.9	89.38	85.5	16.47	10.89	12.61	15.22	20	23	86.2	87.7	13.61	13.62	9	9	8	11	-68.89	-51.22	-65.25	-74.91	20.74	50.63	35.07	22.84	18	19	-60.06	-70.84	38.62	28.14	0	0
Graben	10	9	12	11	70.8	81.89	92.17	83.45	27.97	16.26	12.12	18.81	19	23	76.05	88	23.26	15.94	9	10	9	10	-9.22	-24	-12.33	-2.1	19.28	17.88	34.86	21.82	19	19	-17	-6.95	19.56	28.39	0	0
Grad	10	9	13	10	35.7	31.11	46	55.6	27.92	29.58	38.94	28.2	19	23	33.53	50.17	28	34.3	8	10	7	12	14.88	6.1	-.57	4.42	24.18	8.6	.79	7.59	18	19	10	2.58	17.32	6.44	0	0
Graf	11	9	12	10	71.18	65.56	57.42	65	20.66	32.87	35.87	27.54	20	22	68.65	60.86	26.23	31.84	9	9	9	11	-.33	6.56	-10.44	-.82	34.82	11.41	16.92	36.11	18	20	3.11	-5.15	25.39	28.82	0	0
Gram	10	10	11	12	18.3	22.8	34.27	36.17	23.83	19.23	27.94	39.39	20	23	20.55	35.26	21.2	33.64	9	9	10	9	-43.44	-36.22	-58.8	-60.78	27.91	31.25	28.73	23.75	18	19	-39.83	-59.74	28.98	25.78	0	0
Gramm	12	8	11	12	22.42	31.5	57.55	63.33	26.34	25.42	39.68	32.42	20	23	26.05	60.57	25.7	35.36	10	9	8	11	9	4.44	3.75	15.73	11.79	6.09	7.03	24.38	19	19	6.84	10.68	9.56	19.65	0	0
Granate	10	8	13	10	86.6	82.63	87.38	79.2	20.37	19.23	20.72	24.94	18	23	84.83	83.83	19.39	22.49	11	7	9	10	-53.18	-51.14	-86.33	-84.6	27.75	44.05	23.91	17.86	18	19	-52.39	-85.42	33.75	20.36	0	0
Granit	12	8	11	12	63.5	71	88.09	75.33	26.1	21.17	18.98	22.68	20	23	66.5	81.43	23.95	21.53	9	9	9	11	.22	-7.11	20.22	9.64	30.83	7.7	19.23	26.58	18	20	-3.44	14.4	22.13	23.6	0	0
Grapefruit	11	11	11	12	68.36	93	93	89.58	28.24	7.27	11.03	11.17	22	23	80.68	91.22	23.74	10.99	9	11	11	8	32.33	34.27	23	64.75	17.92	31.71	30.33	28.31	20	19	33.4	40.58	25.79	35.66	0	0
Gras	10	11	13	10	86.3	93.09	93.23	87.6	15.21	6.28	9.39	12.08	21	23	89.86	90.78	11.66	10.77	8	10	8	11	29.63	45.6	53	34.45	41.07	29.04	24.52	21.66	18	19	38.5	42.26	34.75	24.15	0	0
Gräte	11	10	14	9	81.18	79.7	88.57	79.44	20.77	12.77	19.7	22.09	21	23	80.48	85	17.02	20.67	11	8	10	9	-26.27	-33.88	-41.6	-47.78	39.44	34.44	38.16	38.6	19	19	-29.47	-44.53	36.61	37.42	0	0
Grauen	10	9	12	11	23.3	22.56	41.42	47.64	23.66	19.93	29.65	34.09	19	23	22.95	44.39	21.37	31.27	12	7	10	10	-51.75	-72.71	-61.6	-68.3	33.36	27.65	36.69	23.46	19	20	-59.47	-64.95	32.29	30.17	0	0
Greis	12	7	15	8	75.33	73	87.13	83.38	25.79	21.75	10.67	22.06	19	23	74.47	85.83	23.78	15.19	8	10	9	10	-21.88	-18	-14.89	-11	33.52	32.36	37.37	47.75	18	19	-19.72	-12.84	31.95	42.01	0	0
Grenze	10	10	12	11	68.7	63.5	77	66.73	31.79	26.48	14.63	28.17	20	23	66.1	72.09	28.6	22.26	11	8	9	11	-14.91	-31.13	-17.67	-30.18	39.54	25.4	30.59	26.66	19	20	-21.74	-24.55	34.46	28.44	0	0
Grieß	9	10	11	12	64.78	76.9	89.73	89.08	25.49	23.13	16.69	9.75	19	23	71.16	89.39	24.39	13.2	10	9	8	11	-1.9	16.78	22.38	27.64	42.89	23.51	11.9	30.09	19	19	6.95	25.42	35.46	23.78	0	0
Griffel	11	7	12	11	60.64	59.57	90.25	83.27	22.8	20.38	15.6	25.12	18	23	60.22	86.91	21.27	20.52	9	8	10	9	4.11	-8.25	15.5	26.89	21.37	16.37	11.52	30.46	17	19	-1.71	20.89	19.65	22.65	.11	0
Grille	11	8	13	9	81.64	78.63	87.77	89.33	16.69	20.44	19.13	12.21	19	22	80.37	88.41	17.88	16.32	9	9	11	8	28.67	15.33	6.73	14	17.56	20.16	51.3	19.55	18	19	22	9.79	19.58	40.3	0	0
Grimasse	11	9	11	11	70.09	70.78	68.18	76.64	28.64	26.92	23.49	22.58	20	22	70.4	72.41	27.15	22.9	10	9	11	8	-2.2	19.22	-24.73	-11	24.56	43.08	22.3	36.58	19	19	7.95	-18.95	35.32	29.07	0	0
Groschen	10	9	13	10	81.7	78	94.92	89.5	15.58	17.16	7.35	20.2	19	23	79.95	92.57	15.99	14.28	9	9	9	10	18.78	10.78	42	21.7	13.4	16.71	35.44	30.6	18	19	14.78	31.32	15.26	33.69	0	0
Größe	11	10	12	11	37.27	45.7	44.33	61.82	28.86	23.73	31.78	33.74	21	23	41.29	52.7	26.24	33.2	8	10	10	9	31	10.3	18.1	17.67	28.36	13	13.63	19.3	18	19	19.5	17.89	23.08	16.08	0	0
Großmutter	9	11	13	10	72.44	67.64	89.31	90.1	24.79	30.91	19.25	13.03	20	23	69.8	89.65	27.71	16.48	10	8	9	10	60	40.75	78.11	81.9	40.41	43.17	21.84	20.41	18	19	51.44	80.11	41.58	20.59	0	0
Großstadt	10	10	13	10	72.3	75.5	88.54	80.7	25.01	16.17	10.76	20.58	20	23	73.9	85.13	20.56	15.88	9	9	8	11	40.44	39.11	13	55.27	42.76	50.43	26.52	28.98	18	19	39.78	37.47	45.36	34.64	0	0
Großvater	11	9	13	10	64.55	68.89	86.31	93.1	21.72	26.69	23.67	8.86	20	23	66.5	89.26	23.52	18.7	9	9	9	10	36.89	37.33	62.44	74.8	57.24	67.94	34.51	19.9	18	19	37.11	68.95	60.95	27.71	0	0
Grotte	11	10	10	12	78.27	73	79.7	84.5	20.05	17.8	18.23	16.17	21	22	75.76	82.32	18.73	16.89	10	9	9	10	10	-1.67	7.89	13.4	31.78	40.24	28.33	33.3	19	19	4.47	10.79	35.5	30.32	0	0
Grube	9	11	12	11	73.67	83.36	91.75	81.73	19.99	13.71	12.22	12.65	20	23	79	86.96	17.08	13.18	8	11	8	11	-28.25	-26.45	-17.75	-24.73	22.59	22.85	19.66	30.55	19	19	-27.21	-21.79	22.12	26.1	0	0
Grund	14	15	15	17	46.71	45.47	54.2	52.41	33.08	31.85	29.36	25	29	32	46.07	53.25	31.87	26.69	13	13	12	13	4.08	5.08	19.92	6.92	11.62	8.96	27.87	38.6	26	25	4.58	13.16	10.18	33.83	0	0
Grundlage	12	9	14	9	10.67	12.33	38.14	39.67	8.55	13.75	29.93	29.96	21	23	11.38	38.74	10.8	29.27	9	9	9	10	14.56	6.67	17.33	23.2	14.15	18.33	28.76	29.22	18	19	10.61	20.42	16.4	28.35	0	0
Grundrecht	9	12	13	10	20.89	19.33	30.38	37.7	28.61	28.82	29.78	31.05	21	23	20	33.57	28.02	29.87	11	8	10	9	32.45	16.63	60.4	45.78	38.6	32.35	36.4	37.16	19	19	25.79	53.47	36.04	36.5	0	0
Grundsatz	11	9	11	12	7.45	8.22	27.91	31.83	7.41	5.95	24.5	26.14	20	23	7.8	29.96	6.63	24.87	9	9	9	10	-4.11	9.56	34.11	34.3	38.46	38.18	37	33.41	18	19	2.72	34.21	37.84	34.16	0	0
Gruppe	10	10	13	10	52.9	54.4	82.46	69.9	28.72	22.97	18.6	25.54	20	23	53.65	77	25.33	22.28	9	9	9	10	19	10.33	6	23.1	14.71	44.1	13.45	21.25	18	19	14.67	15	32.2	19.58	0	0
Gruß	10	11	14	9	53.4	46.45	57.86	60.67	30.26	25.76	22.98	31.63	21	23	49.76	58.96	27.5	26.03	9	9	10	9	41.56	42.11	44	59.44	26.05	33.73	35.01	25.81	18	19	41.83	51.32	29.24	31.18	0	0
Gulden	12	8	15	8	57.92	61.25	69.33	74.5	27.34	18.38	35.04	28.44	20	23	59.25	71.13	23.66	32.33	10	8	11	8	15.3	14.38	47.09	26.88	20.43	17.7	43.98	30.55	18	19	14.89	38.58	18.72	39.27	0	0
Gummi	9	11	13	10	72	84.36	67.46	79.9	28.1	11.77	19.58	21.37	20	23	78.8	72.87	21.1	20.87	8	11	10	9	-.25	2.82	12.3	12.44	28.05	25.84	25.86	22.75	19	19	1.53	12.37	26.07	23.76	0	0
Gunst	11	9	12	11	34.64	9.22	26.17	35	34.75	14.48	25.31	32.35	20	23	23.2	30.39	29.87	28.57	9	9	9	10	17.22	22.11	40.78	35.7	37.23	39.21	35.17	31.96	18	19	19.67	38.11	37.17	32.67	0	0
Gurke	10	12	12	10	92.2	94.92	96.42	91.1	6.83	6.19	6.24	11.7	22	22	93.68	94	6.48	9.3	10	8	9	10	21.3	19.13	27	36.3	20.14	31.16	18.74	22.57	18	19	20.33	31.89	24.81	20.82	0	0
Gürtel	11	8	13	10	85.36	86	97.85	84.9	12.71	14.44	3.36	23	19	23	85.63	92.22	13.07	16.3	11	7	10	10	5.45	-2.43	21.1	11.2	16.62	8.46	22.79	24.73	18	20	2.39	16.15	14.26	23.69	0	0
Güte	10	9	12	11	31.3	12.33	34.33	40.64	29.73	15.35	31.94	32.99	19	23	22.32	37.35	25.32	31.86	9	9	9	10	58.56	60.89	62.11	62.5	29.61	27.37	32.48	28.79	18	19	59.72	62.32	27.69	29.72	0	0
Gymnastik	11	9	12	12	58.18	68.89	69.58	75	26.39	17.14	30.96	21	20	24	63	72.29	22.81	26.02	9	9	9	10	-2.89	18.67	24	41.2	25.67	48.89	23.8	38.59	18	19	7.89	33.05	39.47	32.78	0	0
Haar	11	11	11	11	90	89.09	95.45	91.55	8.26	13.97	7.47	12.19	22	22	89.55	93.5	11.21	10.07	8	10	8	11	39.13	25.9	33.63	44.55	42.47	23.04	33.08	31.29	18	19	31.78	39.95	32.7	31.63	0	0
Habicht	10	10	13	10	82.1	66.5	91.92	82.3	14.78	31.5	12.51	17.71	20	23	74.3	87.74	25.25	15.41	8	11	10	9	23.5	3	32.5	-4.44	14.48	10.35	57.02	45.18	19	19	11.63	15	15.79	53.78	0	0
Hacke	9	12	11	11	81.33	79.83	92.64	78	16.21	18.29	11.5	24.64	21	22	80.48	85.32	17.02	20.2	11	8	9	11	-2.36	1.63	4.44	13.36	16.86	24.08	17.97	23.79	19	20	-.68	9.35	19.68	21.32	0	0
Hafen	11	9	14	9	81.64	87.33	91.93	83.44	15.74	11.67	11.28	29.47	20	23	84.2	88.61	14.01	20.22	10	8	10	8	29.9	37.75	43.4	48.38	22.83	33.75	29.2	27.27	18	18	33.39	45.61	27.58	27.64	0	0
Hafer	13	8	12	11	64.15	69.5	95.33	83	31.63	20.75	6.36	23.06	21	23	66.19	89.43	27.53	17.36	8	10	9	10	28.13	12.7	39.67	22.5	16.81	16.56	26.55	21.47	18	19	19.56	30.63	17.99	24.93	0	0
Häftling	9	11	12	11	75.56	83.09	79.08	88	19.35	13.11	20.84	11.32	20	23	79.7	83.35	16.22	17.21	9	9	9	10	-50.22	-54.44	-55.44	-62.1	35.77	31.04	28.03	39.92	18	19	-52.33	-58.95	32.56	34.02	0	0
Hagel	12	7	12	11	73.08	82.71	89.17	86.09	19.25	13.96	9.58	13.9	19	23	76.63	87.7	17.72	11.67	12	7	9	10	-14.75	-30.14	-26.89	-45.9	40.51	34.05	45.6	34.42	19	19	-20.42	-36.89	38.04	40.14	0	0
Hahn	10	10	10	13	87.6	91.5	96.5	92.92	13.21	8.97	3.6	8.8	20	23	89.55	94.48	11.17	7.13	9	9	11	8	10.33	.33	45.82	28.75	26.81	12.06	25.19	26.4	18	19	5.33	38.63	20.82	26.43	0	0
Hähnchen	9	12	12	11	79.78	90.5	90.67	89.45	19.35	11.48	11.97	11.64	21	23	85.9	90.09	15.87	11.56	9	9	10	9	26.67	30.22	44	24.44	23.97	33.19	28.34	38.45	18	19	28.44	34.74	28.15	34.05	0	0
Hai	9	13	12	10	96.11	95.15	95.92	90.4	5.49	6.96	6.17	13.26	22	22	95.55	93.41	6.28	10.16	9	9	11	8	10.44	-34.89	-58.91	-58.75	32.19	32.23	33.31	31.94	18	19	-12.22	-58.84	38.99	31.83	0	0
Haken	10	12	12	11	80.7	85.67	86.17	79.18	26.54	12.6	20.49	22.63	22	23	83.41	82.83	19.79	21.34	11	8	10	9	-16.36	-18.75	10.4	8.78	19.14	29.21	15.96	18.24	19	19	-17.37	9.63	23.17	16.61	0	0
Hälfte	10	10	12	11	53.6	49.7	71.58	60.73	27.49	31.4	32.81	32.83	20	23	51.65	66.39	28.79	32.54	9	9	10	9	-9.89	2.44	.4	11.33	21.45	8.82	5.7	15.26	18	19	-3.72	5.58	17.13	12.3	0	0
Hall	9	10	10	11	32.44	27.2	26	49.64	38.09	28.59	27.37	38.6	19	21	29.68	38.38	32.57	35.05	10	10	9	10	19.4	18.4	-.56	1.9	28.13	31.03	24.72	11.67	20	19	18.9	.74	28.83	18.47	0	.04
Halle	12	9	14	9	57.83	82.11	90.57	80.56	30.45	13.53	13.67	20.52	21	23	68.24	86.65	27.11	16.99	8	10	9	11	3.25	9.6	14	23.64	21.86	21.88	26.58	29.56	18	20	6.78	19.3	21.46	27.96	0	0
Halma	10	10	12	11	60.4	59.7	82.83	82.09	19.96	31.33	22.34	21.58	20	23	60.05	82.48	25.57	21.48	9	9	9	10	3.11	21.22	19.33	41.4	9.1	24.43	12.78	34.1	18	19	12.17	30.95	20.17	27.97	0	0
Hals	10	12	13	10	86.5	90.33	86.23	87.2	13.49	11.84	27	16.51	22	23	88.59	86.65	12.46	22.57	11	8	9	10	28.27	17.63	30.44	22.1	33.57	36.99	35.2	34.35	19	19	23.79	26.05	34.46	34.04	0	0
Halsband	10	11	12	10	88.4	83.64	90.75	91.7	11.26	16.7	9.34	13.31	21	22	85.9	91.18	14.23	11.04	10	9	8	11	3.5	2	8.13	27.36	29.4	32.3	21.52	29.08	19	19	2.79	19.26	29.94	27.3	0	0
Halstuch	9	9	12	10	82.33	95.56	94.17	90.4	17.91	4.95	7.09	14.5	18	22	88.94	92.45	14.45	10.96	8	11	10	9	10.38	18.73	32.4	47.11	23.39	33.27	18.43	23.47	19	19	15.21	39.37	29.08	21.72	0	0
Haltung	11	10	13	10	44.82	45.3	40.77	53.7	31.63	26.8	34.94	31.12	21	23	45.05	46.39	28.7	33.24	10	8	9	10	-5.5	20.88	20.78	25.9	23.96	30.2	29.96	30.78	18	19	6.22	23.47	29.35	29.66	0	0
Hammer	14	15	15	17	97.07	96.73	91.73	93.35	4.27	6.97	25.55	6.64	29	32	96.9	92.59	5.73	17.84	10	8	8	11	2.1	-7	16	11.27	27.81	32.06	21.57	32.39	18	19	-1.94	13.26	29.23	27.74	0	0
Hamster	11	9	12	11	89.36	91.67	90.83	88.27	10.75	7.65	14.97	9.5	20	23	90.4	89.61	9.32	12.44	9	10	9	10	33.89	25.4	21.11	22.4	35.84	15.83	36.03	35.03	19	19	29.42	21.79	26.74	34.51	0	0
Hand	11	10	11	11	89.91	93.9	97	88.18	14	6.9	4.43	25.51	21	22	91.81	92.59	11.12	18.43	10	9	11	8	24	19.78	35.55	38.88	21.62	25.87	32.92	23.51	19	19	22	36.95	23.15	28.63	0	0
Handel	11	9	13	9	36.27	33.44	38.62	54.78	26.63	22.58	27.24	33.81	20	22	35	45.23	24.29	30.43	8	10	9	11	0	1.3	13.67	16.64	36.6	12.59	24.4	27.46	18	20	.72	15.3	25.22	25.49	0	0
Handgelenk	10	10	13	10	84.4	90.9	94.54	86.7	17.75	8.03	8.11	19.11	20	23	87.65	91.13	13.82	14.18	8	11	10	9	-3.63	3	29.7	25.22	32.78	10.94	39.23	22.52	19	19	.21	27.58	22.27	31.62	0	0
Händler	11	10	10	12	54.55	57.1	76.3	65.58	24.96	17.06	24.3	28.33	21	22	55.76	70.45	21.07	26.52	9	9	8	11	9.44	-.11	-2.38	13.55	34.33	15	17.64	23.11	18	19	4.67	6.84	26.17	21.98	0	0
Handschuh	9	11	12	11	90.67	91.91	97.08	90.09	8.83	11.39	5.5	9.81	20	23	91.35	93.74	10.07	8.46	8	11	8	11	14.75	21.27	29	44.09	22.11	17.9	17.9	30.21	19	19	18.53	37.74	19.47	26.28	0	0
Handtasche	11	9	11	11	77.09	87.78	91.55	90.09	22.05	15.32	12.91	11.89	20	22	81.9	90.82	19.61	12.13	9	9	10	9	6.56	13.67	12.3	44.22	12.42	20.73	12.02	35.13	18	19	10.11	27.42	16.98	29.81	0	0
Handtuch	11	9	13	9	87.55	89.67	95.08	92.11	13.3	12.31	7.86	10.13	20	22	88.5	93.86	12.57	8.75	9	9	9	11	20.44	25.44	26.11	45.55	19.07	15.8	25.55	32.64	18	20	22.94	36.8	17.18	30.56	0	0
Handy	11	9	12	10	93.91	94.67	90.33	92.1	5.47	7.33	22.92	9.73	20	22	94.25	91.14	6.21	17.79	9	9	8	11	-3.67	22	17.13	37.91	23.8	22.17	53.15	29.84	18	19	9.17	29.16	25.93	41.29	0	0
Hanf	10	9	12	11	78.7	75.44	71.33	75.64	27.47	27.58	22.52	22.8	19	23	77.16	73.39	26.8	22.24	8	10	11	8	15.63	-.1	2.18	2.38	48.36	28.71	32.58	25.55	18	19	6.89	2.26	38.26	29.05	0	0
Hantel	10	11	10	13	82.9	88.09	86.8	83.38	21.16	13.25	15.74	23.7	21	23	85.62	84.87	17.22	20.27	10	9	9	10	4.2	8.89	6.44	6.6	18.56	20.79	8.03	26.25	19	19	6.42	6.53	19.24	19.32	0	0
Harfe	10	10	12	11	89.1	91.4	92.92	90.18	21.16	9.07	9.93	11.78	20	23	90.25	91.61	15.89	10.69	9	9	10	10	52.89	42.89	47.6	48.6	26.22	29.96	28.84	35.16	18	20	47.89	48.1	27.79	31.3	0	0
Harke	10	10	13	10	82.3	83.4	96	83.4	15.48	17.89	5.54	22.46	20	23	82.85	90.52	16.29	16.24	10	9	9	10	-.9	-8.78	20.67	6.4	11.46	17.3	15.45	21.93	19	19	-4.63	13.16	14.67	20	0	0
Harpune	11	9	13	10	87.82	78.33	94.54	74.8	14.12	19.77	6.01	23.53	20	23	83.55	85.96	17.11	18.61	9	10	9	10	-30.44	-23	-27.44	-39.5	32.45	37.94	36.59	31.11	19	19	-26.53	-33.79	34.67	33.43	0	0
Härte	10	10	11	12	34.7	22.3	43.55	39.17	18.02	18.61	30.15	32.73	20	23	28.5	41.26	18.93	30.88	10	8	10	9	-18.3	-24.5	-16.7	-36	36.86	41.41	30.81	29.91	18	19	-21.06	-25.84	37.89	31.15	0	0
Hase	9	12	13	10	90.67	91.5	97.62	89.6	10.86	11.81	3.78	10.33	21	23	91.14	94.13	11.14	8.24	9	9	9	10	40.67	36.33	55.22	39	22.82	27.23	22.34	19.71	18	19	38.5	46.68	24.47	22.03	0	0
Haselnuss	11	10	14	9	89.36	86.5	95.5	94.78	10.56	16.08	7.92	7.95	21	23	88	95.22	13.2	7.76	11	7	8	11	16.09	28.57	35.75	47	28.41	27.07	26.48	34.9	18	19	20.94	42.26	27.79	31.33	0	0
Haube	12	9	11	10	63.42	81.33	80.27	83.1	25.78	14.75	27.72	23.44	21	21	71.1	81.62	23.13	25.17	10	8	10	9	2.1	-10.25	3.2	7.89	27.51	13.87	19.83	36.82	18	19	-3.39	5.42	22.8	28.37	0	0
Häuptling	11	9	13	10	79.27	58.33	83.85	72.4	17.73	29.57	17.45	31.99	20	23	69.85	78.87	25.45	24.87	10	9	10	10	13.2	24.44	11.3	-7.8	32.35	35.27	31.18	23.98	19	20	18.53	1.75	33.31	28.79	0	0
Hauptmann	11	10	12	11	71	57.7	70.58	71	19.03	16.55	26.27	31.91	21	23	64.67	70.78	18.73	28.42	10	9	10	9	-12.6	-18	-23.2	-7.78	43.72	19.84	38.51	22.88	19	19	-15.16	-15.89	33.74	32.2	0	0
Haus	10	9	11	11	91.3	94.22	94.36	94.27	9.99	6.46	11.03	5.41	19	22	92.68	94.32	8.41	8.48	10	9	9	10	32.1	32.89	42.33	47.8	26.7	30.93	20.85	27.35	19	19	32.47	45.21	27.96	23.98	0	0
Haustier	11	10	13	10	77.73	68.9	90.69	93.6	18.82	24.85	13.55	5.64	21	23	73.52	91.96	21.8	10.74	8	10	9	10	16.25	34.8	50.56	46.9	43.53	38.81	25.47	37.03	18	19	26.56	48.63	40.83	31.26	0	0
Haustür	10	10	12	11	85.5	88.2	93.25	90.73	15.04	14.73	11.19	13.02	20	23	86.85	92.04	14.55	11.89	9	9	9	10	7.33	5.22	37.33	21.8	15.38	8.04	29.6	21.84	18	19	6.28	29.16	11.95	26.29	0	0
Haut	9	10	12	11	87.33	80.3	93.17	86.73	11.54	18.92	7.66	16.38	19	23	83.63	90.09	15.85	12.73	8	10	11	8	38.5	29.1	37.73	25.88	43.07	37.34	33.91	30.49	18	19	33.28	32.74	39.05	32.2	0	0
Hebamme	11	9	14	9	70.91	67.44	80	92.22	18.92	29.8	18.19	9.81	20	23	69.35	84.78	23.78	16.36	9	9	8	11	16.44	36	43.88	46.82	25.65	40.64	37.55	33.45	18	19	26.22	45.58	34.47	34.24	0	0
Hebel	11	8	13	10	79.18	83.5	87.15	80.3	13.1	14.73	20.72	21.41	19	23	81	84.17	13.58	20.83	11	7	9	10	11.27	-1.86	10.78	12.6	17.99	13.93	17.31	15.41	18	19	6.17	11.74	17.39	15.9	0	0
Hecht	11	9	11	12	83.45	77.56	92.91	85.42	14.05	17.71	8.76	19.96	20	23	80.8	89	15.65	15.77	8	10	9	10	19.88	11.4	48.78	23.1	20.68	19.31	31.14	32.15	18	19	15.17	35.26	19.81	33.49	0	0
Heer	9	11	13	10	61.44	64.55	78.38	80.3	31.48	15.75	23.53	29.25	20	23	63.15	79.22	23.46	25.55	9	10	9	10	-39.78	-47.1	-50	-34.7	45.57	35.05	41.07	33.06	19	19	-43.63	-41.95	39.39	36.85	0	0
Hefe	11	9	14	9	56.55	80.56	73.79	75.33	20.64	14.57	26.9	28.48	20	23	67.35	74.39	21.54	26.89	9	9	9	10	11	12.22	24.44	34	11.83	16.47	27.79	30.72	18	19	11.61	29.47	13.92	28.97	0	0
Heft	11	10	11	12	85.27	86.7	93.73	82.67	10.34	14.8	8.66	25.11	21	23	85.95	87.96	12.35	19.52	10	8	10	9	4.7	23.63	8.7	21.44	25.72	38.15	12.02	19.41	18	19	13.11	14.74	32.3	16.81	0	0
Hefter	9	10	13	10	79.78	80.5	85	78.1	19.67	18.1	17.97	24.72	19	23	80.16	82	18.33	20.94	10	8	10	9	5.8	3.25	13.1	13.78	20.03	14.54	28.53	25.56	18	19	4.67	13.42	17.35	26.41	0	0
Heil	11	9	12	11	39.27	16.11	35.17	32.91	35.21	20.55	25.76	26.26	20	23	28.85	34.09	31.15	25.43	11	7	9	10	-14.09	3.57	34.44	13.1	42.55	49.25	50.63	27.99	18	19	-7.22	23.21	44.71	40.63	0	0
Heim	10	11	12	11	62.5	49.09	68.83	69.27	26.58	23.84	29.05	31.92	21	23	55.48	69.04	25.48	29.75	8	11	8	11	7.38	28.18	54.5	61.64	54.49	42.1	32.32	40.3	19	19	19.42	58.63	47.44	36.35	0	0
Heimfahrt	8	12	11	11	47	39.42	55.27	68.36	30	28.75	32.85	33.44	20	22	42.45	61.82	28.72	33.03	9	9	7	12	33.56	27.22	51.29	64.33	36.94	28.06	26.02	32.68	18	19	30.39	59.53	31.99	30.33	0	0
Heiterkeit	10	10	11	11	34.5	31.3	52.36	62.45	25.06	18.23	31.51	31.9	20	22	32.9	57.41	21.39	31.37	13	13	12	13	44.69	73.85	78	70.54	48.54	23.93	9.65	22.13	26	25	59.27	74.12	40.33	17.38	0	0
Heizung	9	10	13	10	82	86	87.92	92.1	17.75	13.7	15.51	10.42	19	23	84.11	89.74	15.43	13.42	9	10	9	10	25.67	26.7	61.44	65.8	25.07	22.67	21.01	22.8	19	19	26.21	63.74	23.17	21.47	0	0
Hektar	10	9	13	10	39.8	36.11	59.08	47.7	36.06	32.33	28.76	31.81	19	23	38.05	54.13	33.44	29.97	10	9	8	11	12	4.78	9.88	6.09	18.21	12.97	19.07	10.12	19	19	8.58	7.68	15.95	14.21	0	0
Held	12	8	14	8	42.75	39.5	32.86	55.13	29.23	25.03	25.95	29.57	20	22	41.45	40.95	26.98	28.78	9	10	11	9	43.44	40.1	23.64	33.78	39.98	49.63	28.2	37.44	19	20	41.68	28.2	44.1	32.18	0	0
Heldenmut	9	10	12	11	35.67	10.9	44.17	30.55	32.78	8.56	29.11	27.42	19	23	22.63	37.65	25.99	28.53	7	11	10	9	30	25.55	23.9	7	52.3	49.22	50.77	53.51	18	19	27.28	15.89	48.95	51.35	0	0
Helm	10	10	12	11	85.9	88	94.17	82.45	17.41	18.84	10.89	23.87	20	23	86.95	88.57	17.69	18.82	10	8	8	11	10.4	-4.5	12.75	6.45	32.46	26.74	47.31	20.9	18	19	3.78	9.11	30.17	33.51	0	0
Hemd	8	11	12	11	75	92.18	95.25	93	28.11	7.56	6.68	11.3	19	23	84.95	94.17	20.37	9.04	9	9	10	10	17.56	5	26.6	24	21.52	9.51	19.59	20.71	18	20	11.28	25.3	17.39	19.67	0	0
Hemmnis	11	9	13	10	11.09	13.78	36.38	48.9	9.19	15.12	35.22	39.09	20	23	12.3	41.83	11.94	36.63	7	11	8	11	-43.71	-43.09	-34.75	-45.18	20.05	25.62	36.19	28.95	18	19	-43.33	-40.79	22.98	31.67	0	0
Hengst	12	9	12	11	86.25	85.22	93.25	88.36	13.53	14.74	9.39	13.63	21	23	85.81	90.91	13.71	11.61	9	10	9	10	7.33	12.1	45.67	16.1	19.63	50.9	23.54	29.43	19	19	9.84	30.11	38.37	30.16	0	0
Henkel	10	9	11	12	71	85.44	88.55	90.83	20.74	10.78	15.4	18.7	19	23	77.84	89.74	17.94	16.85	10	8	8	11	4.6	1.63	23.88	14.82	7.07	2.45	28.81	21.5	18	19	3.28	18.63	5.59	24.51	0	0
Henker	9	12	12	11	77.56	69.33	73.42	71.55	23.62	23	34.26	31.89	21	23	72.86	72.52	23.05	32.41	10	9	9	10	-70.1	-64.33	-95	-91.4	26.72	34.69	5.43	11.71	19	19	-67.37	-93.11	30.01	9.22	0	0
Henne	11	8	12	11	71.18	92.13	91.75	92.36	28.47	9.19	14.46	8.97	19	23	80	92.04	24.42	11.88	9	10	8	11	14.22	11.3	29.5	17.27	10.56	9.97	29.35	39.91	19	19	12.68	22.42	10.07	35.47	0	0
Herbst	10	10	13	10	72.1	59.9	77.08	69	28.66	31.38	26.32	30.3	20	23	66	73.57	29.91	27.75	10	8	12	7	49.3	31.25	18.83	37.57	28.91	40.76	36.9	37.49	18	19	41.28	25.74	34.81	37.24	0	0
Herd	10	9	11	12	84.3	94.22	96.18	90.92	13.03	4.21	6.08	14.16	19	23	89	93.43	10.89	11.15	10	8	9	10	14.1	13.63	39.67	24.4	24.73	34.85	30.41	21.63	18	19	13.89	31.63	28.7	26.58	0	0
Herdplatte	11	9	12	10	89.18	85.33	97.58	90.3	9.21	14.1	3.15	11.85	20	22	87.45	94.27	11.5	8.9	8	10	10	9	3.75	-11.3	17.6	.89	14.43	22.88	45.77	34.89	18	19	-4.61	9.68	20.55	40.77	0	0
Hering	11	7	11	11	78.09	77	95.73	88.82	22.52	22.61	5.53	13.91	18	22	77.67	92.27	21.89	10.92	10	8	9	10	23.9	3	47.56	32.5	26.52	24.15	25.79	39.53	18	19	14.61	39.63	26.96	33.72	0	0
Herr	12	8	13	9	45.42	48	76.08	74.11	26.6	16.85	28.47	28.22	20	22	46.45	75.27	22.71	27.7	11	8	9	10	-5.18	3.63	14.44	32.7	36.2	18.78	26.47	30.44	19	19	-1.47	24.05	29.75	29.37	0	0
Herrscher	11	10	11	11	45.73	42.9	64.45	60.09	29.52	26.01	29.43	37.33	21	22	44.38	62.27	27.24	32.88	10	8	8	11	-43.6	-46.88	-56	-21.73	17.65	39.45	34.36	33.72	18	19	-45.06	-36.16	28.44	37.33	0	0
Herz	9	11	10	13	94.11	96.27	81.1	91.38	9.39	3.17	24.76	8.52	20	23	95.3	86.91	6.6	17.82	9	9	9	11	55.67	54.44	49.33	45.45	32.28	36	37.04	40.92	18	20	55.06	47.2	33.18	38.24	0	0
Herzog	9	11	12	11	52.67	40.91	68.33	66.36	31.55	22.28	24.77	31.32	20	23	46.2	67.39	26.77	27.45	10	8	9	10	-2.5	-3.38	-5.78	3.4	29.42	20.26	19.88	27.8	18	19	-2.89	-.95	25.05	24.17	0	0
Heu	9	10	11	11	84	88.2	94.18	82.91	13.52	10.81	11.94	17.06	19	22	86.21	88.55	12.01	15.48	9	9	10	9	16.56	26.67	44.2	40.56	14.2	14.63	25.75	26.15	18	19	21.61	42.47	14.92	25.28	0	0
Hexe	10	10	12	11	84.7	89.7	68.08	78.55	10.19	12.94	33.5	18.35	20	23	87.2	73.09	11.62	27.26	9	9	8	11	-.33	-5.33	-59	-35.36	32.66	53.35	31.86	31.16	18	19	-2.83	-45.32	42.99	32.83	0	0
Hilfe	11	8	12	10	37	25.75	44.58	50.7	29.3	19.13	27.26	37.45	19	22	32.26	47.36	25.53	31.62	10	10	9	10	27.6	40.5	40.67	69.6	40.25	48.58	60.49	34.21	20	19	34.05	55.89	43.92	49.31	0	0
Himbeere	10	9	12	11	85.3	97.44	98.08	85.45	16.21	3	3.12	22.86	19	23	91.05	92.04	13.2	16.85	9	10	9	10	52.11	47.8	61.56	36	23.33	30.56	26.64	27.06	19	19	49.84	48.11	26.72	29.21	0	0
Himmel	11	9	12	11	77.45	90.89	88.92	90.36	28.36	11.38	10.93	12.49	20	23	83.5	89.61	22.91	11.45	11	7	8	11	60.73	60.29	60.25	68.82	26.05	37.35	26.46	23.34	18	19	60.56	65.21	29.86	24.37	0	0
Hinweis	10	9	11	12	23.7	13.78	30.27	36.58	17.91	14.69	21.66	25.69	19	23	19	33.57	16.8	23.53	9	9	9	10	7.67	15	15.22	28.5	42.04	25.89	17.63	31.53	18	19	11.33	22.21	34.08	26.11	0	0
Hirsch	10	10	12	11	90.1	92.4	97	90	12.8	9.32	4.31	13.85	20	23	91.25	93.65	10.96	10.45	9	10	9	10	34.56	24.9	54.33	37.2	26.07	22.16	26.72	19.67	19	19	29.47	45.32	23.92	24.25	0	0
Hirse	10	10	12	11	58	74.7	83.58	68.64	28.39	18.57	19.16	28.59	20	23	66.35	76.43	24.87	24.77	10	9	9	10	4.6	10.22	32.44	7.2	20.48	20.18	24.15	19.66	19	19	7.26	19.16	19.97	24.9	0	0
Hirte	11	10	12	11	73.27	70.7	89.17	82.09	28.17	29.76	14.36	18.31	21	23	72.05	85.78	28.23	16.39	9	10	8	11	25.22	24.8	47.38	28.91	16.64	31.13	25.06	21.1	19	19	25	36.68	24.65	24.07	0	0
Hobel	9	10	13	10	68.44	76.8	90.62	82.8	29.93	26.18	12.81	21.68	19	23	72.84	87.22	27.55	17.25	10	8	9	10	-3.8	-7.13	14.56	14.4	16.38	15.89	24.58	21.91	18	19	-5.28	14.47	15.77	22.55	0	0
Hochhaus	9	12	12	11	86.89	90.83	95.42	86.45	9.75	8.85	5.6	19.57	21	23	89.14	91.13	9.23	14.51	10	9	8	11	-17.7	-16.33	8	-2.55	30.59	42.43	20.78	30.17	19	19	-17.05	1.89	35.62	26.5	0	0
Hochschule	12	8	11	12	65	62.25	68.36	72	29.5	8.78	33.99	27.11	20	23	63.9	70.26	23.11	29.93	10	9	10	9	28	35.44	54.2	58.67	35.06	36.8	25.64	25.98	19	19	31.53	56.32	35.09	25.18	0	0
Hochzeit	10	9	11	11	67	76.11	94.55	84.18	34.2	17.3	5.03	15.42	19	22	71.32	89.36	27.2	12.38	9	9	9	10	45.56	48.89	81.44	61.3	38.82	39.6	17.22	21.92	18	19	47.22	70.84	38.08	21.88	0	0
Hocker	8	11	12	11	89	91.64	93.25	85	12.2	10.86	9.95	18.29	19	23	90.53	89.3	11.19	14.81	10	9	10	9	8.7	4	19.5	8.44	12.55	18.81	12.4	15.02	19	19	6.47	14.26	15.55	14.47	0	0
Hockey	11	11	11	12	76	75.55	80.09	85.25	18.48	28.03	26.7	17.02	22	23	75.77	82.78	23.17	21.81	8	11	9	10	11.13	8.09	15.89	21.5	18.25	19.58	19.26	27.44	19	19	9.37	18.84	18.57	23.45	0	0
Hof	9	10	12	11	54.67	83.3	87.5	82.18	34.53	12.44	14.92	19.17	19	23	69.74	84.96	28.69	16.9	9	9	10	9	24.33	8.33	26.1	22.11	19.71	16.93	27.13	26.29	18	19	16.33	24.21	19.63	26.06	0	0
Hoffnung	11	8	12	11	29.73	11.38	29.33	44.18	25.18	12.28	36.05	34.46	19	23	22	36.43	22.31	35.31	9	9	10	9	64.22	72	66.5	69.78	13.87	26.79	29.18	23.28	18	19	68.11	68.05	21.08	25.87	0	0
Höhe	11	8	12	11	59.91	61.38	71.08	62.18	28.85	29.91	27.75	31.69	19	23	60.53	66.83	28.48	29.36	8	10	10	9	25.25	-12	8.9	-19.56	19.21	34.64	24.52	47.66	18	19	4.56	-4.58	33.91	39.03	0	0
Höhle	11	8	13	10	83.36	78.5	88.15	78.7	12.92	16.47	10.14	26.43	19	23	81.32	84.04	14.29	19.1	11	8	10	9	20.64	1.25	-4.9	-23	31.15	42.95	28.02	39.91	19	19	12.47	-13.47	36.78	34.45	0	0
Hohn	10	10	12	11	27.6	26.5	34.17	29.45	25.2	22.22	35.23	28.1	20	23	27.05	31.91	23.13	31.39	7	12	9	11	-26.29	-45.58	-52.22	-51.09	35.82	25.25	30.14	30.03	19	20	-38.47	-51.6	30.15	29.29	0	0
Holz	11	8	11	12	87.09	89.25	89.64	83.5	13.39	9.75	12.39	20.92	19	23	88	86.43	11.74	17.27	10	8	10	9	29.1	21.75	32.4	24.89	18.31	25.29	25.52	26.1	18	19	25.83	28.84	21.33	25.36	0	0
Holzhaus	11	8	13	10	85	86.38	97.38	84.2	10.36	11.64	3.48	20.18	19	23	85.58	91.65	10.62	14.76	8	10	9	10	27.63	39.7	28.67	40.8	32.33	28.64	34.19	24.01	18	19	34.33	35.05	30.05	29.09	0	0
Honig	10	9	12	11	75.6	91.89	92.58	85	26.47	8.45	11.02	22.17	19	23	83.32	88.96	21.26	17.29	11	8	9	10	42.45	36.5	61.11	46.7	26.24	34.86	28.85	34.85	19	19	39.95	53.53	29.4	32.12	0	0
Horn	10	11	14	9	84	88	84.64	69	16.28	10.07	15.9	27.71	21	23	86.1	78.52	13.2	22.13	8	10	9	10	10.25	3.8	-.33	3.9	13.22	30.89	35.3	35.44	18	19	6.67	1.89	24.25	34.45	0	0
Hornisse	9	10	13	10	91.22	83.7	87.15	83.4	6.83	16.04	17.35	19.27	19	23	87.26	85.52	12.81	17.88	12	7	10	10	-11.5	-50.14	-41.5	-47.5	33.8	42.58	34	31.05	19	20	-25.74	-44.5	40.86	31.84	0	0
Hort	9	10	11	11	33.56	39.4	63	74.73	33.26	23.33	26.45	26.07	19	22	36.63	68.86	27.8	26.32	9	8	9	10	.56	3.25	18.33	45.4	26.5	30.99	21.22	33.33	17	19	1.82	32.58	27.8	30.8	.04	0
Hose	10	11	12	10	91	91.82	96.83	92.3	7.9	11.03	4.53	7.1	21	22	91.43	94.77	9.44	6.14	13	6	10	9	20.92	16.5	26.4	34.22	22.01	20.74	30.31	30.38	19	19	19.53	30.11	21.14	29.76	0	0
Hotel	11	10	10	13	74.55	69.2	93.4	87.92	18.46	12.53	8.15	11.59	21	23	72	90.3	15.77	10.4	10	9	9	10	27.2	28.44	31.67	46.8	23.78	34.33	26.83	20.54	19	19	27.79	39.63	28.4	24.32	0	0
Huf	11	10	11	12	82.45	77.7	91.82	83.75	17.91	21.22	9.42	17.11	21	23	80.19	87.61	19.21	14.27	10	8	11	9	3.2	6.5	12.45	7	20.5	9.62	29.57	38.47	18	20	4.67	10	16.23	33.03	0	0
Hufeisen	10	11	13	9	85.3	89.73	93.38	88.89	25.36	10.61	8.25	14.93	21	22	87.62	91.55	18.73	11.35	9	9	11	8	24.22	37.11	35	47.13	22.44	30.29	32.34	28.81	18	19	30.67	40.11	26.7	30.68	0	0
Hüfte	10	11	12	11	74	83.36	84.33	86	27.74	12.01	15.7	18.27	21	23	78.9	85.13	21.01	16.61	10	9	10	9	25.8	14.56	24.8	13.33	39.26	32.12	22.57	25.73	19	19	20.47	19.37	35.53	24.16	0	0
Huhn	11	9	12	10	86.64	90.33	94.58	92.6	11.03	8.79	7.74	9.65	20	22	88.3	93.68	10.01	8.5	10	9	9	10	9.6	3.56	37.44	30.6	37.81	8.2	31.19	31.5	19	19	6.74	33.84	27.47	30.67	0	0
Hummer	11	10	11	12	88.73	87.5	90.09	85	11.54	12	12.32	18.93	21	23	88.14	87.43	11.48	15.97	10	9	10	9	26.6	21.56	22.7	25.44	39.61	30.81	42.02	45.09	19	19	24.21	24	34.83	42.29	0	0
Humor	9	11	13	10	36.11	25.36	39.77	59	36.03	27.68	33.91	33.61	20	23	30.2	48.13	31.3	34.41	11	9	9	10	60.45	68.89	60	68.8	35.94	23.61	26.84	17.49	20	19	64.25	64.63	30.55	22.21	0	0
Humpen	10	6	14	9	55.5	60.33	83.57	82.11	35.37	33.12	18.9	19.71	16	23	57.31	83	33.49	18.78	9	7	9	10	20.22	4.57	9.89	9.3	23.56	8.64	16.74	17.68	16	19	13.38	9.58	19.75	16.76	.17	0
Hund	9	11	13	10	90.78	94	96.69	96.4	12.6	6.07	4.01	3.34	20	23	92.55	96.57	9.43	3.65	10	8	8	11	22.3	35.75	45.5	55.09	48.42	34.91	31.1	29.66	18	19	28.28	51.05	42.31	29.81	0	0
Hunger	12	9	12	10	39.5	42.78	52.5	65.1	29.03	31.12	29.92	29.99	21	22	40.9	58.23	29.21	29.93	9	9	9	11	-38.33	-38	-55.78	-38.27	30.41	33.66	36.15	48.56	18	20	-38.17	-46.15	31.12	43.25	0	0
Hupe	10	10	13	11	75.2	79	84.92	70.27	23.76	19.43	16.26	31.32	20	24	77.1	78.21	21.21	24.9	10	9	9	10	-5.5	-1.78	-11.44	-11.3	34.05	15.37	32.43	29.38	19	19	-3.74	-11.37	26.24	29.99	0	0
Hürde	12	10	14	9	62.17	67.1	80	65.67	35.39	21.49	21.48	31.31	22	23	64.41	74.39	29.33	26.08	10	8	9	10	-29.4	-17.88	-.78	-10.1	10.78	22.26	32.15	28.88	18	19	-24.28	-5.68	17.33	29.99	0	0
Husar	6	9	12	11	54.67	65.33	81.83	69	35.71	18.25	23.6	24.45	15	23	61.07	75.7	25.98	24.36	9	7	11	8	-.44	9.43	-5.45	3.5	27.62	14.99	35.33	21.68	16	19	3.88	-1.68	22.85	29.94	.15	0
Hut	10	10	12	11	94	92	92.75	89.27	7.01	10.37	10.17	13.64	20	23	93	91.09	8.68	11.81	9	9	9	10	.78	13.22	26	21.4	22.21	12.48	25.62	37.07	18	19	7	23.58	18.61	31.38	0	0
Hütte	10	9	14	9	82.6	80.78	91.57	84.89	18.01	15.1	8.48	19.03	19	23	81.74	88.96	16.26	13.61	9	9	9	10	35.33	22.78	29.78	31.1	17.5	25.68	33.83	26.29	18	19	29.06	30.47	22.28	29.23	0	0
Hyäne	11	10	12	11	83.82	91.8	86.17	85.91	15.36	7.05	18.18	14.99	21	23	87.62	86.04	12.53	16.35	9	10	9	10	-21.89	-22.7	-33.67	-24.2	49.63	26.58	39.61	41.4	19	19	-22.32	-28.68	38.05	39.72	0	0
Hydrant	10	10	13	10	84.2	74.9	85.15	79.6	15.04	16.04	16.15	24.82	20	23	79.55	82.74	15.87	20.06	9	9	9	10	12.56	17	23.44	18.4	11.49	22.63	28.03	19.96	18	19	14.78	20.79	17.56	23.56	0	0
Ideal	9	11	14	9	23.11	15.91	26.86	36.67	23.96	22.98	29.62	36.86	20	23	19.15	30.7	23.09	32.19	8	10	9	10	19.25	42.1	41.89	46.8	34.87	48.48	27.62	39.39	18	19	31.94	44.47	43.37	33.49	0	0
Idee	9	11	14	9	36.44	24	30.71	54.78	36.72	29.79	31.93	33.75	20	23	29.6	40.13	32.79	34.07	9	9	10	9	58.78	52.78	45.2	63.56	24.17	29.43	29.33	26.53	18	19	55.78	53.89	26.3	28.84	0	0
Igel	9	11	13	10	92.67	96.64	96.69	85.6	9.04	4.43	7.2	10.39	20	23	94.85	91.87	6.99	10.2	8	10	9	10	31.88	29.4	59.89	26.4	15.7	25.92	29.62	43.98	18	19	30.5	42.26	21.42	40.65	0	0
Iglu	12	8	12	10	91.83	89.63	86.5	81.2	13.84	15.18	19.28	12.8	20	22	90.95	84.09	14.04	16.5	10	8	11	9	32.7	31.25	30.91	18.56	22.49	43.41	29.78	22.25	18	20	32.06	25.35	32.32	26.74	0	0
Ikone	9	11	12	11	48	46.91	75.08	76.82	35.87	28.64	30.97	24.39	20	23	47.4	75.91	31.21	27.4	11	7	10	9	19.18	24.29	39.9	17.89	19.97	25.51	18.82	32.36	18	19	21.17	29.47	21.7	27.75	0	0
Imbiss	11	7	13	10	65.82	66.57	78	80.8	29.2	30.88	19.58	26.61	18	23	66.11	79.22	28.95	22.38	10	9	8	11	16.6	10.33	44.38	36.09	34.55	28.71	22.49	25.18	19	19	13.63	39.58	31.2	23.8	0	0
Imker	10	10	11	12	76.3	78.2	85.73	75.67	22.7	13.42	16.11	23.68	20	23	77.25	80.48	18.17	20.61	8	10	9	10	30	28.1	42.33	38.1	20.13	27.91	31.39	26.85	18	19	28.94	40.11	24.08	28.34	0	0
Impfung	10	10	11	12	61.5	59.9	88.82	78.17	29.9	23.92	8.96	22.73	20	23	60.7	83.26	26.37	18.01	9	9	8	11	12.44	-4	-13.63	-2.36	33.34	32.76	46.78	57.75	18	19	4.22	-7.11	33.16	52.31	0	0
Inbegriff	10	10	12	10	11.3	6.7	33.25	25.1	14.87	5.91	32.99	30.61	20	22	9	29.55	11.26	31.45	9	10	10	9	-1.44	13.3	11.1	16.33	28.81	22.28	21.56	29.55	19	19	6.32	13.58	25.97	25.05	0	0
Indianer	12	8	14	9	86.58	90.75	85.36	74.56	17.24	12.84	14.05	24.85	20	23	88.25	81.13	15.4	19.24	9	9	9	10	30.78	36	17.89	29.1	40.68	28.05	27.54	24.01	18	19	33.39	23.79	34	25.66	0	0
Industrie	9	10	12	11	50.22	49.4	61.58	62.55	27.43	29.88	26.67	32.03	19	23	49.79	62.04	27.94	28.68	10	8	10	9	-29.3	-25.88	3.9	8.11	36.84	24.91	39.67	12.6	18	19	-27.78	5.89	31.26	29.37	0	0
Inhalt	11	8	12	11	24.73	31.5	38.33	50.36	22.84	25.47	33.3	36.4	19	23	27.58	44.09	23.54	34.56	7	12	9	10	12.57	10.5	5.67	20.5	24.38	11.97	9.62	25.74	19	19	11.26	13.47	16.93	20.75	0	0
Insekt	9	12	12	11	85.44	76.42	89.42	85.27	12.14	19.59	17.14	22.69	21	23	80.29	87.43	17.06	19.63	8	11	9	10	12.13	-20.36	-6.44	-21.9	39.42	35.9	37.31	39.63	19	19	-6.68	-14.58	39.9	38.3	0	0
Insel	10	9	12	11	89.6	89.56	93.33	88.45	13.79	12.44	9.04	10.18	19	23	89.58	91	12.8	9.7	10	9	9	11	55.2	63.44	46.67	47.36	22.08	33.04	37.89	28.46	19	20	59.11	47.05	27.33	32.11	0	0
Instanz	11	10	12	10	26.73	20	39.33	42.8	29.21	22.54	30.17	19.09	21	22	23.52	40.91	25.83	25.22	9	10	10	10	-28.11	-20.5	-11.6	1.7	35.02	25.93	28.04	21.95	19	20	-24.11	-4.95	29.94	25.44	0	0
Institut	9	10	12	11	54.78	46.8	63.67	69.45	24.53	30.03	32.28	28.68	19	23	50.58	66.43	27.11	30.06	8	10	9	10	18.38	12.4	22.78	24.1	19.63	21.91	28.03	30.79	18	19	15.06	23.47	20.55	28.7	0	0
Instrument	11	10	13	10	62.36	68.5	90.69	80.6	31.59	19.63	14.57	21.95	21	23	65.29	86.3	26.12	18.41	9	10	8	11	31.11	49.1	18.38	34.36	21.91	35.67	35.15	30.66	19	19	40.58	27.63	30.57	32.69	0	0
Internat	10	11	12	11	58.2	43	63.25	82.91	35.54	15.38	31.05	15.96	21	23	50.24	72.65	27.33	26.43	12	6	9	10	-9.58	-15.17	5.78	17.9	48.38	39.86	56.88	21.42	18	19	-11.44	12.16	44.6	41.3	0	0
Interview	9	10	12	11	53.78	43.9	58.17	60.73	34.69	24.92	37.55	33.59	19	23	48.58	59.39	29.52	34.92	9	10	9	10	3.11	4.4	22.33	-.4	31.15	25.7	22.7	39.97	19	19	3.79	10.37	27.6	34.11	0	0
Ironie	10	11	13	10	26.1	17.82	32.92	36.4	19.77	15.7	35.04	28.66	21	23	21.76	34.43	17.8	31.76	10	9	9	10	17.8	2.33	-20.22	-5.7	42.44	44.2	27.15	34.61	19	19	10.47	-12.58	42.8	31.34	0	0
Irrtum	12	8	13	10	14	9.5	31.69	31.2	23.91	10.72	34.64	23.4	20	23	12.2	31.48	19.45	29.64	11	7	10	9	-18.82	-29.86	-29.3	-32.78	19.02	41.73	30.92	26.64	18	19	-23.11	-30.95	29.29	28.22	0	0
Jacke	9	10	12	11	87.89	93.2	93.67	89.55	15.38	6.48	10.64	10	19	23	90.68	91.7	11.56	10.32	8	10	8	11	22.38	12.1	36.75	43.27	11.66	26.58	21.03	29.92	18	19	16.67	40.53	21.39	26.08	0	0
Jade	10	9	12	10	57	67.22	66.08	61.3	29.45	32.46	24.54	23.86	19	22	61.84	63.91	30.49	23.77	9	9	8	11	33.33	50	31.25	38.55	23.6	28.33	27.98	33.15	18	19	41.67	35.47	26.71	30.47	0	.04
Jagd	9	12	12	11	68.89	64.25	66	69.91	19.89	21.61	25.82	28.75	21	23	66.24	67.87	20.51	26.7	9	10	9	10	-13.89	-41.7	-8.56	-24.2	26.95	42.22	46.09	40.34	19	19	-28.53	-16.79	37.65	42.69	0	0
Jagdhund	10	9	13	10	83	81.33	90.54	89.8	14.54	23.22	15.8	10.73	19	23	82.21	90.22	18.61	13.54	8	10	9	10	-8.38	7.3	45.67	12.4	29.22	35.92	28.22	47.88	18	19	.33	28.16	33.15	42.33	0	0
Jäger	10	10	12	11	74.2	75.8	87.42	88.64	20.57	19.78	15.32	13.43	20	23	75	88	19.66	14.14	8	11	10	9	-1.5	-21.18	-6.6	.33	31.69	23.11	35.41	33.38	19	19	-12.89	-3.32	28.05	33.68	0	0
Jaguar	10	10	11	12	88.9	86.6	87.27	86.42	13.76	13.89	21.14	16.82	20	23	87.75	86.83	13.51	18.57	8	11	9	10	49.13	39.45	-.78	17.2	26.86	33.12	57.79	51.63	19	19	43.53	8.68	30.23	53.87	0	0
Jahr	14	15	15	17	34.5	33.87	44.53	55.76	24.17	25.87	32.38	29.55	29	32	34.17	50.5	24.61	30.93	8	10	9	11	18.25	16.9	15.78	22.09	27.28	23.43	28.54	33.32	18	20	17.5	19.25	24.44	30.62	0	0
Jahreszeit	9	10	13	10	38	35.5	61.23	71.3	38.05	17.6	35.18	32.2	19	23	36.68	65.61	28.29	33.55	8	10	8	11	38	26.2	5.88	23.55	28.18	41.65	7.4	24.25	18	19	31.44	16.11	35.81	20.7	0	0
Jalousie	9	12	12	11	84.33	89.75	98.25	84.09	17.75	10.67	2.8	20.76	21	23	87.43	91.48	14.01	15.88	8	10	9	10	6.75	11.8	30.89	34.5	23.83	28.17	32.57	26.49	18	19	9.56	32.79	25.7	28.74	0	0
Joghurt	11	9	13	10	71.27	89.22	81.08	87.2	28.73	11.38	18.25	17.81	20	23	79.35	83.74	23.94	17.92	10	8	8	12	28.6	46.88	50.13	55.42	27.33	45.85	28.68	32.02	18	20	36.72	53.3	36.72	30.06	0	0
Joker	9	13	12	11	82.89	74.77	75.5	69.36	18.44	25.61	30.44	31.01	22	23	78.09	72.57	22.83	30.17	9	9	8	11	50	43	36.75	36.91	28.87	32.55	25.23	27.02	18	19	46.5	36.84	30.07	25.55	0	0
Journalist	9	10	10	13	60.11	55.8	78.5	68.31	26.99	15.64	29.49	28.52	19	23	57.84	72.74	21.23	28.74	9	9	10	9	13	17.11	2.2	25.67	47.2	38.54	24.28	19.81	18	19	15.06	13.32	41.85	24.78	0	0
Jugend	10	11	12	11	38	38.09	59.92	74.55	30.67	21.85	18.95	33.83	21	23	38.05	66.91	25.73	27.49	10	8	8	11	39.4	33.5	70.25	83.36	42.17	51.97	27.26	22.21	18	19	36.78	77.84	45.42	24.65	0	0
Junge	11	9	12	11	71.27	77.78	92.83	88.55	22.26	21.75	14.48	13.57	20	23	74.2	90.78	21.7	13.91	9	10	9	11	19.44	21	39.44	47	23.51	32.86	26.66	25.71	19	20	20.26	43.6	28.04	25.73	0	0
Jungfrau	11	8	12	11	56	35	58.67	71.09	30.06	37.88	35.43	35.63	19	23	47.16	64.61	34.26	35.28	8	10	9	10	24.75	5.6	50.33	18.8	27.19	12.53	34.84	23.22	18	19	14.11	33.74	21.99	32.72	0	0
Jupiter	9	12	12	10	85.56	48.58	69.08	65.5	14.8	23.09	27.5	38.52	21	22	64.43	67.45	27.06	32.18	9	10	9	10	17.78	17.6	21	20.2	44.63	21.7	30.77	18.69	19	19	17.68	20.58	33.48	24.4	0	0
Juwel	8	12	12	11	67.75	80.83	64.08	79.27	23.38	18.41	25.42	22.2	20	23	75.6	71.35	21	24.64	8	10	9	10	39.25	32.7	48.11	47.9	31.41	32.02	29.67	32.88	18	19	35.61	48	30.99	30.53	0	0
Kabel	9	11	12	11	84.67	89.73	83.17	85.09	13.77	9.56	26.58	13.9	20	23	87.45	84.09	11.61	21.02	9	9	8	11	4	-2	-2.25	8.55	18.39	9.54	21.67	14.17	18	19	1	4	14.54	18.01	0	0
Kabine	10	10	11	12	67.1	77.7	85.91	77	27.95	20.38	19.76	23.8	20	23	72.4	81.26	24.42	21.94	9	9	10	9	16.11	15.67	25.4	21.78	26.89	25.35	25.7	16.3	18	19	15.89	23.68	25.35	21.26	0	0
Kachel	10	9	12	11	80.7	86.22	92.92	81.91	17.36	14.22	10.96	21.72	19	23	83.32	87.65	15.77	17.5	9	9	9	10	-3	1.89	23.22	18.4	24.19	14.57	32.36	16.37	18	19	-.56	20.68	19.53	24.61	0	0
Kadett	11	11	12	11	62	47.09	53.67	64.73	25.27	26.62	21.76	30.63	22	23	54.55	58.96	26.45	26.37	8	9	10	9	-10.75	-8.89	3.7	.33	36.28	25.63	33.66	12.77	17	19	-9.76	2.11	30.09	25.34	.03	0
Käfer	11	10	13	10	89.45	90.8	92.69	88.4	12.04	6.92	8.73	11.01	21	23	90.1	90.83	9.72	9.79	9	9	9	10	3.44	17.89	9.89	-17.5	32.69	28.54	30.6	31.92	18	19	10.67	-4.53	30.68	33.51	0	0
Kaffee	10	10	14	9	88.7	92.8	95.43	93.44	9.06	6.51	5.05	5.88	20	23	90.75	94.65	7.96	5.35	9	9	8	11	19.56	42.11	31.25	63.64	59.1	43.15	45.52	31.16	18	19	30.83	50	51.52	40.19	0	0
Käfig	8	12	12	10	82.38	88.17	94.17	93.5	8.77	13.8	9.08	7.38	20	22	85.85	93.86	12.13	8.17	10	9	10	9	-37.6	-42.33	-53.7	-39.67	28.07	27.55	29.59	30.87	19	19	-39.84	-47.05	27.15	30.21	0	0
Kaftan	6	9	12	10	53.5	47.56	65.33	61.8	36.12	21.15	29.72	33.9	15	22	49.93	63.73	27.03	30.96	8	7	7	11	-7.75	-26.86	-9	8.18	21.29	48.38	26.8	24.32	15	18	-16.67	1.5	36.43	25.99	.21	.07
Kahn	9	11	12	10	79.44	80.73	92.67	92.4	18.44	16.73	17.97	8.06	20	22	80.15	92.55	17.06	14.04	9	9	8	11	16	8.33	43.63	30.73	35.42	16.71	32.91	20.22	18	19	12.17	36.16	27.16	26.29	0	0
Kaiser	9	12	11	11	61.78	63.5	78.55	71.45	33.18	25.27	27.14	32.14	21	22	62.76	75	28.15	29.26	9	10	8	11	-24.33	-.7	-6	1.27	38.41	17.47	30.14	31.36	19	19	-11.89	-1.79	30.91	30.22	0	0
Kajak	10	9	13	10	80.1	83.67	87.38	86.8	24.89	19.03	18.05	14.1	19	23	81.79	87.13	21.77	16.1	9	9	10	9	23.89	32.11	28.4	18.22	29.79	30.93	29.54	28.04	18	19	28	23.58	29.76	28.51	0	0
Kajüte	10	9	13	10	72.9	70	89.92	85.6	25.89	16.33	11.01	17.9	19	23	71.53	88.04	21.35	14.21	12	6	10	9	33.25	28.33	37.8	32.44	27.89	38.54	32.94	29.95	18	19	31.61	35.26	30.75	30.8	0	0
Kakao	11	9	12	11	76.45	89.78	90.42	87.27	31.41	11.11	15.32	15.82	20	23	82.45	88.91	24.85	15.29	10	9	9	10	43.7	55	54.67	43.9	24.87	41.71	25.33	39.01	19	19	49.05	49	33.41	32.81	0	0
Kaktus	10	10	12	11	85.9	94.2	95.08	90	15.59	8.68	5.38	9.64	20	23	90.05	92.65	13	7.97	10	8	9	10	16.7	18.13	15.56	25.1	30.8	35.22	42.73	25.36	18	19	17.33	20.58	31.83	34.02	0	0
Kalb	8	12	12	11	81.13	92.58	91.67	90	23.62	8.68	12.04	12.77	20	23	88	90.87	16.8	12.14	7	11	8	11	19.43	22.55	49.5	30.18	16.1	25.57	28.85	23.25	18	19	21.33	38.32	21.88	26.83	0	0
Kalender	10	11	13	10	77.7	80.64	87.85	93.9	22.71	18.42	16.08	5.97	21	23	79.24	90.48	20.1	12.84	9	9	9	10	5.44	34.67	24.67	24.1	32.52	21.24	21.9	16.88	18	19	20.06	24.37	30.59	18.86	0	0
Kalif	10	10	13	10	68.4	51.9	60	57	29.38	23.01	25.11	27.93	20	23	60.15	58.7	27.04	25.8	9	10	8	11	-3.11	11.6	-11.75	-15.27	44.32	32.04	41.15	40.92	19	19	4.63	-13.79	37.99	39.9	.04	0
Kalk	10	11	12	10	69.8	62.73	75.08	60.8	21.36	29.07	27.51	28.43	21	22	66.1	68.59	25.32	28.21	9	9	9	10	-10.22	-22.78	-5.33	-2.1	25.22	25.36	29.27	15.44	18	19	-16.5	-3.63	25.37	22.42	0	0
Kamel	12	9	12	11	91.5	93.78	94.58	92.55	7.08	7.9	7.42	10.16	21	23	92.48	93.61	7.34	8.69	9	9	9	10	22.22	33	45.22	26.4	29.92	29.95	28.08	34.96	18	19	27.61	35.32	29.56	32.48	0	0
Kamera	13	7	12	10	90.08	89.29	96.17	87.5	9.94	8.86	5.49	15	20	22	89.8	92.23	9.34	11.48	10	9	9	10	36.2	42.78	39	31.3	24.94	42.89	27.04	19.86	19	19	39.32	34.95	33.77	23.19	0	0
Kamerad	9	11	10	13	57.56	39.36	69.7	66.62	31.25	23.61	24.82	28.04	20	23	47.55	67.96	28.12	26.14	9	9	9	10	14.78	18.44	60.89	54.4	54.45	36.91	30.07	31.64	18	19	16.61	57.47	45.16	30.23	0	0
Kamille	10	10	12	11	70	86.2	80.67	85.36	20.48	14.46	26.63	17.19	20	23	78.1	82.91	19.15	22.24	10	9	9	10	26.4	38.33	44.67	40.4	23.26	27.82	26.05	18.25	19	19	32.05	42.42	25.53	21.75	0	0
Kamin	11	9	13	10	84.45	93.33	93	91.2	15.72	10.43	9.9	8.47	20	23	88.45	92.22	14.01	9.15	8	10	7	12	37.38	61.3	39.14	57	32.19	38.51	22.73	25.35	18	19	50.67	50.42	36.9	25.36	0	0
Kamm	10	10	13	10	85	96.9	96.85	92	19.52	3.51	5.23	11.04	20	23	90.95	94.74	14.95	8.41	10	8	9	9	2.6	17.25	15.44	24.11	8.47	19.24	17.6	23.81	18	18	9.11	19.78	15.7	20.79	0	0
Kammer	10	10	11	12	67	69.9	88	87	21.16	23.13	16.02	19.01	20	23	68.45	87.48	21.62	17.25	9	9	9	10	-19.89	-14.78	-6.89	18.2	17.28	17.33	21.78	36.89	18	19	-17.33	6.32	16.99	32.51	0	0
Kampf	10	10	12	10	63.2	55.1	62.08	64.5	25.07	30	28.4	28.77	20	22	59.15	63.18	27.23	27.91	9	9	8	11	-21.11	-46.11	-47.5	-43.91	52.02	43.12	35.2	34.38	18	19	-33.61	-45.42	48.1	33.79	0	0
Kanal	10	10	11	12	72.1	78	88.09	87.83	23.13	15.85	15.51	9.47	20	23	75.05	87.96	19.53	12.42	9	10	10	9	6.33	-9.6	21	24.44	25.75	24.63	26.82	20.43	19	19	-2.05	22.63	25.78	23.41	0	0
Känguruh	11	10	12	11	93.91	92.7	87.58	90.55	8.7	8.83	26.45	9.98	21	23	93.33	89	8.56	19.93	9	9	8	11	43.56	41.11	41	29.09	23.53	39.19	28.67	27.85	18	19	42.33	34.11	31.38	28.05	0	0
Kaninchen	10	10	12	11	92.5	93.2	96.83	89.91	13.18	5.77	5.24	11.71	20	23	92.85	93.52	9.91	9.41	9	9	11	8	29.56	49.11	53	33.75	33.49	33.73	28.35	17.12	18	19	39.33	44.89	34.12	25.61	0	0
Kanister	10	9	12	10	76.1	81.33	96.33	84	22.72	16.19	5.76	18.05	19	22	78.58	90.73	19.54	14.02	9	9	10	9	.89	-13.44	3.6	2.33	21.9	17.22	18.88	24.12	18	19	-6.28	3	20.48	20.91	0	0
Kanne	10	11	13	10	87	90.18	95.08	91.6	14.06	13.15	8.03	8.92	21	23	88.67	93.57	13.35	8.41	9	10	11	8	13.67	9.2	26.09	28	10.45	11.15	24.86	23.06	19	19	11.32	26.89	10.77	23.47	0	0
Kanone	11	10	11	12	89.55	85.4	91.55	84.17	10.38	18.11	9.74	23.33	21	23	87.57	87.7	14.35	18.15	9	10	10	9	-44.44	-41.3	-67	-69.56	40.59	32.41	39.58	22.28	19	19	-42.79	-68.21	35.5	31.71	0	0
Kante	10	8	12	11	71.4	73.75	80.83	70	28.73	19.65	21.24	28.14	18	23	72.44	75.65	24.44	24.82	9	10	10	9	-14.67	-13.1	5.8	2.78	21.39	10.67	9.99	33.74	19	19	-13.84	4.37	16.15	23.63	0	0
Kanu	11	9	11	11	92.18	89.33	94.82	84.55	7.08	11.08	6.19	13.16	20	22	90.9	89.68	8.96	11.33	9	9	8	11	35.22	38.67	28.38	26.45	30.22	24.6	27.13	23.3	18	19	36.94	27.26	26.79	24.26	0	0
Kanzler	10	10	12	11	57.9	62	74.25	82.09	34.62	25.16	31.31	27.83	20	23	59.95	78	29.53	29.29	9	9	10	9	-23.44	-6.44	-10.2	11.44	41.88	21.41	33.4	32.5	18	19	-14.94	.05	33.43	33.92	0	0
Kapelle	11	10	12	10	79.73	75.7	92	87.7	17.96	15.67	7.07	14.07	21	22	77.81	90.05	16.62	10.76	8	10	9	10	7.38	10.3	68.78	41	47.1	31.99	20.72	33.13	18	19	9	54.16	38.18	30.7	0	0
Kapitän	11	9	13	10	79.09	72.22	87.46	84.7	18.99	22.16	14.37	17.42	20	23	76	86.26	20.22	15.45	9	9	9	10	27.22	39.78	35.56	36.8	13.83	40.39	25.63	31.7	18	19	33.5	36.21	29.99	28.19	0	0
Kaplan	10	10	11	12	45.1	50.4	68.36	80.75	32.02	28.05	31.41	15.39	20	23	47.75	74.83	29.43	24.64	6	9	10	9	-42.83	-3.56	27.4	-1.33	42.4	7.04	34.44	22.58	15	19	-19.27	13.79	32.67	32.2	.11	0
Kappe	10	9	12	10	71.8	76	83	79.9	26.96	21.45	17.05	25.3	19	22	73.79	81.59	23.92	20.71	10	8	8	11	7.2	-5.88	12.63	18	16.44	13.75	10.93	32.52	18	19	1.39	15.74	16.3	25.33	0	0
Kapsel	12	9	11	12	68.33	74.56	84.18	73	25.35	20.21	18.1	24.06	21	23	71	78.35	22.95	21.71	10	8	10	9	-9.7	-1.75	6.4	2.22	19.37	39.06	18.45	14.26	18	19	-6.17	4.42	29.04	16.28	0	0
Kapuze	10	9	11	12	88.4	86.22	89	87.58	13.08	21.04	24.25	13.89	19	23	87.37	88.26	16.84	19.09	7	11	9	10	26.14	23.27	14.44	31.4	31	23.55	35.28	28.39	18	19	24.39	23.37	25.83	32.12	0	0
Karaffe	10	9	12	11	72.2	79.89	91.17	90.36	33.81	24.38	12.16	10.8	19	23	75.84	90.78	29.18	11.28	10	9	9	10	7.1	34.78	22.67	29.8	27.29	36.1	25.51	24.55	19	19	20.21	26.42	33.96	24.58	0	0
Kardinal	11	9	12	11	59	51.89	90.5	75.82	37.25	18.23	11.87	22.43	20	23	55.8	83.48	29.72	18.85	10	8	9	10	-42.2	-14.63	15.67	-6.6	38.1	11.38	29.69	46.66	18	19	-29.94	3.95	31.95	40.14	0	0
Karotte	11	9	11	11	90.18	95.89	89	88.82	11.98	7.18	27.87	18.17	20	22	92.75	88.91	10.28	22.96	8	10	10	9	19.13	20.9	47.1	42.22	22.4	30.04	20.41	27.21	18	19	20.11	44.79	26.18	23.32	.04	0
Karpfen	10	10	11	12	79	76.8	94.91	90.67	20.47	18.93	5.75	10.28	20	23	77.9	92.7	19.22	8.52	9	10	10	10	19.78	-6.6	43	25.5	17.89	25.95	34.35	47.5	19	20	5.89	34.25	25.73	41.33	0	0
Karren	10	11	11	12	81.3	67.55	85.73	82.58	15.59	15.35	19.17	19.14	21	23	74.1	84.09	16.64	18.78	9	9	10	9	7.33	2	18.8	2.67	16.08	9.79	21.38	17.43	18	19	4.67	11.16	13.2	20.79	0	0
Karte	11	9	13	10	80.18	89.67	76.69	83.5	19.94	13.4	23.55	16.32	20	23	84.45	79.65	17.56	20.58	9	9	8	11	13.33	12.33	12.75	25.55	20.99	17.01	12.52	22.06	18	19	12.83	20.16	18.54	19.33	0	0
Kartell	12	8	12	11	33.83	15.75	39.83	38.64	27.64	17.35	35.31	31.2	20	23	26.6	39.26	25.22	32.66	9	10	9	10	-29.22	-29.7	-35.22	-38.2	28.3	24.56	40.72	37.54	19	19	-29.47	-36.79	25.64	38	0	0
Kartoffel	13	7	13	10	92.62	96.14	96.85	93.2	7.6	3.8	3.76	10.69	20	23	93.85	95.26	6.64	7.61	10	9	8	11	19.5	23	52	50	21.18	21.94	24.27	24.46	19	19	21.16	50.84	21.01	23.71	0	0
Karton	11	9	13	10	75	79.11	94.62	90.6	21.15	23.8	7.48	7.14	20	23	76.85	92.87	21.87	7.45	10	9	8	12	9.8	1.11	.88	17.5	22.45	16.08	12.02	17.11	19	20	5.68	10.85	19.67	17.1	0	0
Karussell	10	11	13	10	83.3	88.82	93.77	95.9	17.98	11.81	8.89	3.98	21	23	86.19	94.7	14.94	7.13	10	9	9	10	12.7	37.22	13.44	33.5	18.86	46.38	37.76	30.75	19	19	24.32	24	35.95	34.82	0	0
Käse	9	10	11	12	87	89.7	97.36	85.25	15.98	10.49	5.59	17.71	19	23	88.42	91.04	13.06	14.47	9	10	7	12	46.22	42.2	52.14	41.67	35.8	28.1	26.91	29.71	19	19	44.11	45.53	31.13	28.42	0	0
Kaserne	12	9	14	9	76.5	69.78	84.86	85.44	18.39	11.13	16.02	26.17	21	23	73.62	85.09	15.72	20.02	11	8	9	10	-43.55	-35	-51.89	-30.4	34.92	29.42	35.57	47.09	19	19	-39.95	-40.58	32.14	42.34	0	0
Kasper	10	11	12	11	62.5	77.27	81.25	89.82	30	21.85	25.47	12.05	21	23	70.24	85.35	26.47	20.23	8	10	9	10	-3.63	23.7	38.44	7.4	35.85	38.82	24.75	46.15	18	19	11.56	22.11	39.02	39.88	0	0
Kasse	11	11	10	13	77.73	81.18	77.9	80.23	27.17	14.45	17.64	19.29	22	23	79.45	79.22	21.31	18.21	10	8	10	9	1.4	-2.25	23.7	15.67	27.29	28.72	28.34	17.3	18	19	-.22	19.89	27.16	23.48	0	0
Kassette	9	10	12	11	86.67	89.6	84.25	87.82	13.21	15.11	20.49	12.39	19	23	88.21	85.96	13.93	16.83	10	9	9	10	15.9	16.11	17.67	26	25.29	32.19	18.49	20.97	19	19	16	22.05	27.93	19.75	0	0
Kästchen	10	9	13	10	72.5	78	88.92	84	14.3	16.51	13.19	12.66	19	23	75.11	86.78	15.21	12.91	11	7	10	9	6.55	20.14	7.5	7.89	14.2	25.12	17.61	30.36	18	19	11.83	7.68	19.69	23.76	0	0
Kasten	11	9	12	11	80.55	85.67	87.67	83.18	14.33	13.12	15.65	18.61	20	23	82.85	85.52	13.69	16.88	10	9	9	10	0	.22	1.44	7.2	11.72	8.67	22.77	22.44	19	19	.11	4.47	10.1	22.16	0	0
Katalog	10	10	12	11	67.2	79.2	86.75	83	28.74	17.15	14.16	14.37	20	23	73.2	84.96	23.84	14.06	8	11	11	8	7.63	17.45	13.91	18.13	22.92	23.97	26.88	22.43	19	19	13.32	15.68	23.42	24.52	0	0
Katapult	11	9	11	11	79	81.11	81.18	69.36	21.41	14.68	16.41	31.92	20	22	79.95	75.27	18.25	25.5	10	9	10	10	-5.6	-5.11	-7.8	-33.2	44.35	19.48	30.15	41.56	19	20	-5.37	-20.5	33.94	37.66	0	0
Kater	10	10	13	9	91	83.1	95.15	89.11	9.49	13.94	5.9	21.29	20	22	87.05	92.68	12.29	14.21	8	10	9	10	-.25	16.7	34.56	33.5	60.61	48.67	45.31	58.05	18	19	9.17	34	53.31	50.97	0	0
Katze	12	9	13	10	89.5	96.22	97.15	88.3	11.48	6.57	3	23.92	21	23	92.38	93.3	10.07	16.09	11	8	10	9	39.45	24.88	48.1	39.78	49.14	50.3	33.03	58.2	19	19	33.32	44.16	48.79	45.49	0	0
Kaufhaus	10	9	12	11	74.9	72.33	89.75	84.82	22.12	20.83	17.04	15.93	19	23	73.68	87.39	20.96	16.33	9	10	10	9	1.33	17.8	25.2	48.11	29.01	26.2	27.91	23.89	19	19	10	36.05	28.08	27.95	0	0
Kaufmann	9	10	13	10	59	38.3	69.31	79.7	29.64	22.24	30.37	21.23	19	23	48.11	73.83	27.4	26.74	10	9	8	11	16.8	-1	23	16.18	31.96	12.85	23.5	25.54	19	19	8.37	19.05	25.83	24.27	0	0
Kaugummi	10	9	12	11	87.2	85.56	84.75	85.55	10.42	12.93	18.99	21.13	19	23	86.42	85.13	11.37	19.58	9	9	9	10	7.22	14.22	-27.22	.5	22.73	41.66	37.98	33.25	18	19	10.72	-12.63	32.75	37.36	0	0
Kaulquappe	10	11	11	12	92.1	84.18	96.18	83.5	7.55	15.54	5.42	19.77	21	23	87.95	89.57	12.76	15.83	12	6	9	10	9.83	7.5	-2.56	-9.8	29.2	37.03	39.59	37.05	18	19	9.06	-6.37	30.93	37.37	0	0
Kautabak	10	12	12	11	55.7	66.17	69.58	82.55	33.91	25.3	32.59	20.77	22	23	61.41	75.78	29.26	27.77	10	9	10	9	-17.2	-6.33	-42	-43.33	35.97	21.31	40.32	38.62	19	19	-12.05	-42.63	29.66	38.42	0	0
Kautschuk	10	9	13	10	48.8	48.78	72.15	58.5	29.5	35.34	20.89	24.07	19	23	48.79	66.22	31.47	22.87	9	10	10	9	13.22	8.4	27.5	14.56	8.3	30.21	21.33	13.03	19	19	10.68	21.37	22.21	18.63	.04	0
Kavalier	11	10	12	10	55	47.6	71.17	64.4	32.97	22.89	26.54	35.98	21	22	51.48	68.09	28.17	30.59	10	9	8	11	38.5	47.11	39.38	38.45	25.09	25.73	38.56	33.7	19	19	42.58	38.84	25.07	34.77	0	0
Kaviar	11	9	12	11	84.55	89.56	93.5	80.18	18.62	6.67	9.46	22.79	20	23	86.8	87.13	14.41	18.08	8	11	10	9	24	-2.36	30.3	20.67	21.32	31.43	33.7	41.96	19	19	8.74	25.74	30.08	37.08	0	0
Kegel	11	9	12	10	83.91	84.56	88.42	89.5	18.27	12.07	17.33	19.86	20	22	84.2	88.91	15.4	18.07	8	10	9	11	6.25	7.2	17.11	9.55	23.75	13.44	17.61	8.89	18	20	6.78	12.95	18.11	13.68	0	0
Kehle	10	10	11	12	70.5	68.2	83.73	84.92	20.23	29.52	21.9	19.19	20	23	69.35	84.35	24.66	20.06	8	11	9	11	-9.88	-8.73	3.56	-.64	36.87	12.51	17.53	26.8	19	20	-9.21	1.25	24.82	22.62	0	0
Kehlkopf	10	10	11	12	77	76.6	79.09	85.08	16.89	25.09	25.72	18.75	20	23	76.8	82.22	20.81	22.04	9	9	9	10	-7.44	-11.44	13.56	15.8	26.4	15.88	35.49	16.48	18	19	-9.44	14.74	21.23	26.4	0	0
Keil	9	10	12	11	73.89	71.4	88.83	70.18	22.67	22.71	16.07	27.63	19	23	72.58	79.91	22.09	23.81	9	10	10	9	-8	-11.5	-1.3	-.89	16.01	18.85	30.8	13.91	19	19	-9.84	-1.11	17.17	23.67	0	0
Keks	10	9	12	11	90.5	92.33	91.5	83.45	8.85	6.93	14.27	23.63	19	23	91.37	87.65	7.83	19.3	9	9	10	9	34.56	41.89	53.3	54.56	25.78	37.59	20.46	31.06	18	19	38.22	53.89	31.5	25.27	0	0
Kelch	10	10	12	11	77.5	83.1	92.25	84.36	19.81	15.12	8.44	16.33	20	23	80.3	88.48	17.39	13.16	10	8	9	10	15	5	37.44	17.9	33.62	4.78	36.43	24.87	18	19	10.56	27.16	25.18	31.62	0	0
Kelle	13	8	13	10	78.46	92	90.38	89.4	18.57	10.11	13.96	17.58	21	23	83.62	89.96	16.97	15.26	9	10	11	8	11.78	3.3	14.64	11.5	20.95	18.99	32.02	16.79	19	19	7.32	13.32	19.86	26.11	0	0
Keller	9	12	10	13	82.67	84.5	85.8	85.62	15.98	11.46	19.18	14.45	21	23	83.71	85.7	13.24	16.26	8	11	9	10	-8.63	-18.09	3.22	-23.5	20.8	31.27	23.96	30.57	19	19	-14.11	-10.84	27.1	30.17	0	0
Kellner	10	9	11	11	73	79.78	87.36	87.36	19.24	10.87	10.87	11.67	19	22	76.21	87.36	15.8	11	11	8	10	9	8.73	23.75	22.9	24	21.91	40.89	32.84	18.23	19	19	15.05	23.42	31.22	26.22	0	0
Kenntnis	10	9	12	11	24.1	9	28.42	47.73	23.53	11.99	25.13	30.77	19	23	16.95	37.65	20.02	29.04	11	8	9	10	33.82	34.38	45	48.1	31.45	33.29	36.34	29.37	19	19	34.05	46.63	31.31	31.95	0	0
Kerker	11	9	13	10	80.91	77.78	74.62	88.9	22.23	8.39	25.96	13.23	20	23	79.5	80.83	17.1	22.17	8	10	10	9	-54.5	-70.1	-80.6	-79.11	32.45	35.12	22.6	19.99	18	19	-63.17	-79.89	33.91	20.82	0	0
Kerl	9	11	13	10	51.22	57.18	68.92	72.1	25.99	17.96	28.53	25.01	20	23	54.5	70.3	21.53	26.5	9	9	9	10	-8.67	16.22	-5.67	-6.9	26.25	42.35	29.75	36.47	18	19	3.78	-6.32	36.5	32.54	0	0
Kern	11	8	12	11	76.36	79.13	86.42	81.36	20.54	21.84	16.25	26.48	19	23	77.53	84	20.54	21.39	9	9	10	9	2.44	14.89	14.5	13.89	29.13	27.17	21.44	16.05	18	19	8.67	14.21	28.07	18.56	0	0
Kerze	9	12	12	10	88.67	92.75	94	92.9	13.34	10.98	5.15	9.4	21	22	91	93.5	11.91	7.22	10	9	9	10	28.6	40.11	28.44	45.6	33.73	26.93	10.73	26.95	19	19	34.05	37.47	30.43	22.18	0	0
Kessel	12	8	14	9	86	88.38	88.57	81.44	14.76	9.36	21.29	25.05	20	23	86.95	85.78	12.65	22.55	9	10	10	8	6.67	4.6	7.1	11	16.76	19.22	14.62	17.84	19	18	5.58	8.83	17.62	15.75	0	0
Ketchup	10	10	12	11	86.4	91.7	82.25	88	13.52	13.07	25.19	14.39	20	23	89.05	85	13.22	20.5	10	8	8	11	5.1	21.5	25.75	32.36	31.6	22.72	18.77	28.7	18	19	12.39	29.58	28.49	24.62	0	0
Kette	9	9	12	11	90.67	94.44	97.25	87.91	9.64	5.75	4.59	12.79	18	23	92.56	92.78	7.94	10.37	9	10	11	8	2.67	36.9	-6.55	32.75	24	36.24	33.4	22.19	19	19	20.68	10	34.95	34.77	0	0
Kiefer	10	10	12	10	76.5	79.9	96.42	91.1	15.36	14.93	3.4	11.44	20	22	78.2	94	14.85	8.33	10	9	9	10	4.1	4.89	56.89	28.8	20.42	21.45	22.36	29.49	19	19	4.47	42.11	20.33	29.41	0	0
Kieme	9	12	12	11	67.44	72.75	74.17	71.64	34.1	19.07	31.57	23.33	21	23	70.48	72.96	25.93	27.34	10	9	9	11	2.2	4.11	5.89	7.27	10.53	15.54	31.75	18.34	19	20	3.11	6.65	12.79	24.54	0	0
Kies	10	11	12	10	76.1	84.55	82.83	85	24.07	15.77	22.77	20.04	21	22	80.52	83.82	20.09	21.1	10	8	9	10	4.9	4.25	17.56	6.5	12.84	20.46	28.34	25.79	18	19	4.61	11.74	16.12	26.86	0	0
Kiesel	11	8	12	11	73.91	80.25	84.25	76.64	22.39	19.2	15.74	28.15	19	23	76.58	80.61	20.79	22.34	9	9	9	10	22.89	-.44	13.11	12.8	21.27	14.14	11.85	39.64	18	19	11.22	12.95	21.24	29.12	0	0
Kilo	11	10	11	10	45.45	38.3	47.55	67.3	34.34	21.2	30.36	32.4	21	21	42.05	56.95	28.38	32.18	11	7	10	9	-4.09	-8.86	7.2	14.33	25.19	10.92	8.98	18.21	18	19	-5.94	10.58	20.52	14.18	0	0
Kimono	11	10	12	11	79.64	94.5	83.67	86	21.41	8.62	18.88	18.08	21	23	86.71	84.78	17.9	18.12	7	10	9	11	34.57	35.8	27.44	27.36	30.07	32.4	26.87	38.99	17	20	35.29	27.4	30.49	33.23	.03	0
Kind	14	15	15	17	94.5	93	93.6	92.29	5.8	12.69	12.53	11.41	29	32	93.72	92.91	9.83	11.77	13	13	12	13	48.62	36.54	74.5	81.46	34.11	42.08	17.15	21.9	26	25	42.58	78.12	38.03	19.68	0	0
Kinn	11	9	11	12	79.82	91.33	96.64	89.67	21.91	11.25	4.18	11.59	20	23	85	93	18.45	9.37	8	11	10	9	12	6.45	20	22.67	26.8	24.12	23.32	21.94	19	19	8.79	21.26	24.71	22.09	0	0
Kino	11	9	13	10	78.45	88.11	88.38	90.2	24.45	11.3	15.9	13.89	20	23	82.8	89.17	19.82	14.75	8	11	8	11	44.25	60.73	21.88	56.18	30.93	32.67	20.07	23.14	19	19	53.79	41.74	32.17	27.51	0	0
Kiosk	10	10	12	11	84.6	82.8	90.67	89.73	20.13	19.81	15.89	12.54	20	23	83.7	90.22	19.46	14.07	9	10	7	12	17.11	17.3	10.86	18.92	27.83	23.32	4.98	21.27	19	19	17.21	15.95	24.82	17.34	0	0
Kirche	10	9	14	9	93.9	94.56	96.07	95.33	6.79	4.93	7.44	7.35	19	23	94.21	95.78	5.83	7.24	9	10	9	10	-21.11	17.8	55.56	32.8	49.04	33.63	34.26	40.97	19	19	-.63	43.58	45.09	38.69	0	0
Kirchturm	10	10	13	10	84.1	87.8	95.92	94.8	17.73	14.82	4.09	5.09	20	23	85.95	95.43	16.01	4.48	8	11	9	10	7	31.27	42.11	40.3	41.13	28.06	27.4	35.02	19	19	21.05	41.16	35.31	30.79	0	0
Kirsche	12	8	11	12	92.83	97.5	95.36	94.67	8.04	4.54	9.44	4.25	20	23	94.7	95	7.11	7.05	11	8	11	8	43.55	52	67.73	58.25	36.97	28.44	21.91	28.28	19	19	47.11	63.74	33.05	24.51	0	0
Kissen	10	11	13	10	89.3	95.64	93.08	91.7	7.42	5.97	7.35	7.51	21	23	92.62	92.48	7.29	7.29	10	9	8	11	43	44.11	33.13	53.91	28.7	33.9	24.99	25.28	19	19	43.53	45.16	30.38	26.63	0	0
Kiste	10	11	12	11	84	89.18	95.5	90.64	16.11	10.76	6.56	6.39	21	23	86.71	93.17	13.48	6.8	9	10	8	11	12.67	-2.6	10.25	8.36	20.54	22.81	14.57	9.46	19	19	4.63	9.16	22.56	11.54	0	0
Kittel	10	10	11	12	81	83.5	88.73	85.67	16.92	13.2	16.46	21.69	20	23	82.25	87.13	14.83	18.99	9	9	11	8	-6.11	2.89	5.64	-8.88	20.09	35.88	21.57	33.71	18	19	-1.61	-.47	28.59	27.47	0	0
Kiwi	11	8	12	11	90.82	95.13	90.17	89.27	8.08	7.06	14.38	12.93	19	23	92.63	89.74	7.78	13.4	10	9	10	9	36.2	40.67	37.5	52.56	19.1	29.52	39.53	22.84	19	19	38.32	44.63	23.98	32.75	0	0
Klammer	12	8	11	12	77	84.63	90.18	82.08	22.49	18.44	15.53	19.61	20	23	80.05	85.96	20.8	17.86	9	9	7	12	-3.89	6.33	18.71	4.92	17.19	17.27	23.19	27.12	18	19	1.22	10	17.52	25.99	0	0
Klang	10	10	13	10	43.2	29	57.31	40.3	33.68	32.47	37.83	31.36	20	23	36.1	49.91	33.01	35.46	10	9	9	10	39.3	52	39	47	29.61	36.51	20.77	31.96	19	19	45.32	43.21	32.76	26.82	0	0
Klappe	11	9	12	10	62.27	64.22	71.58	69.7	26.92	21.06	22.57	29.91	20	22	63.15	70.73	23.86	25.52	9	9	9	11	-8.33	-3.22	1.56	0	18.62	13.53	8.8	12.16	18	20	-5.78	.7	16.01	10.54	0	0
Klapper	9	10	11	11	68.33	51.9	64.73	85	14.42	27.42	31.31	15.28	19	22	59.68	74.86	23.23	26.18	9	7	9	10	-5.44	-12.14	7.78	22.7	20.78	27.6	12.16	40.8	16	19	-8.38	15.63	23.38	30.93	.15	0
Klasse	9	12	11	11	50	47.75	65	90	33.94	27.65	25.16	8.07	21	22	48.71	77.5	29.71	22.27	9	10	9	11	20.67	-1.8	8.67	27	27.74	19.89	14.79	24.09	19	20	8.84	18.75	25.93	22.02	0	.03
Klavier	10	9	11	11	90.8	95.56	97.18	93.45	8.99	7.45	5.34	10.19	19	22	93.05	95.32	8.43	8.17	10	9	10	9	51.8	43.67	46.1	70.56	30.14	33.47	27.82	21.24	19	19	47.95	57.68	31.13	27.29	0	0
Kleber	12	9	11	12	61.42	81.89	82.91	81.33	30.08	13.68	17.87	23.14	21	23	70.19	82.09	26.08	20.34	9	9	7	12	-5.78	8.44	12.29	7.83	18.57	18.59	13.44	12.82	18	19	1.33	9.47	19.45	12.86	0	0
Klecks	11	10	14	9	75.64	79.6	78.43	82.67	16.48	17.85	27.84	23.7	21	23	77.52	80.09	16.83	25.82	10	8	10	9	-5.5	11.88	-31.1	-31.33	12.39	39.73	26.04	32.31	18	19	2.22	-31.21	28.46	28.34	0	0
Klee	11	9	12	11	80.36	89.33	95.67	93.45	24.71	12.36	6.18	10.64	20	23	84.4	94.61	20.16	8.48	8	10	9	10	32.5	45.1	49.22	37.9	21.75	34.04	24.85	45.67	18	19	39.5	43.26	29.15	36.76	0	0
Kleid	11	10	13	9	84.45	90.8	94.38	94.33	13.8	7.19	7.49	4.66	21	22	87.48	94.36	11.36	6.35	9	10	8	11	45.56	39.5	27.63	32.36	32.65	33.09	45.88	28.17	19	19	42.37	30.37	32.11	35.57	0	0
Kleidung	11	9	13	10	61.27	79.67	88.15	86.1	31.24	17.01	14.58	25.23	20	23	69.55	87.26	26.9	19.43	9	9	8	11	19.22	28.11	36.88	45.36	16.78	32.85	24.63	34.63	18	19	23.67	41.79	25.71	30.34	0	0
Kleinkind	11	8	11	11	68	78.25	95.09	89	29.48	17.29	6.77	18.08	19	22	72.32	92.05	25.02	13.68	10	9	10	9	25.1	31.11	54.6	56.89	40.85	51.65	38.21	32.77	19	19	27.95	55.68	45.05	34.77	0	.03
Kleister	10	9	10	13	60.6	69.78	87.2	82.62	20.1	24.09	15.79	23.96	19	23	64.95	84.61	21.96	20.5	9	9	10	9	-5.44	1.33	-4	5.56	13.41	15.79	30.36	24.38	18	19	-2.06	.53	14.63	27.37	0	0
Klempner	13	8	12	11	63.08	69	81.58	85	29.76	13.92	22.68	17.11	21	23	65.33	83.22	24.65	19.83	8	10	9	10	-3.13	-4.9	24	7.2	17.44	13.67	28.07	31.48	18	19	-4.11	15.16	15	30.33	0	0
Klette	10	10	12	11	54.6	66.9	82.42	77.91	34.62	27.99	18.52	25.85	20	23	60.75	80.26	31.28	21.92	10	8	10	9	-15.5	-20.75	-6.9	-14	17.72	26.47	32.91	35.98	18	19	-17.83	-10.26	21.49	33.62	0	0
Klingel	10	11	14	9	80.9	89.82	87.07	85.56	22.83	10.12	17.44	14.03	21	23	85.57	86.48	17.51	15.87	8	10	8	11	-8.88	4.3	7.75	27.82	33.14	15.33	21.89	25.86	18	19	-1.56	19.37	24.94	25.72	0	0
Klinke	11	8	11	12	83.45	87.63	95.73	88.92	16.75	5.66	5.85	13.3	19	23	85.21	92.17	13.14	10.78	10	8	10	9	3.8	9.75	12.6	20.11	11	25.74	18.75	27.52	18	19	6.44	16.16	18.61	22.96	0	0
Klippe	10	9	12	11	81.1	81.78	81.58	75.64	20.62	13.1	20.35	27.21	19	23	81.42	78.74	17	23.51	9	10	9	10	7.67	-8.3	-10.11	-9.1	35.44	38.64	37.04	35.96	19	19	-.74	-9.58	37.04	35.45	0	0
Klo	11	9	12	11	81.09	96.22	89.5	93.09	23.85	5.02	19.77	7.38	20	23	87.9	91.22	19.22	14.95	9	9	9	10	7.89	-20.78	18.89	17.2	38.84	24.09	49.01	31.8	18	19	-6.44	18	34.65	39.67	0	0
Kloß	12	9	12	10	75.08	76.44	88.42	87.7	23.19	18.39	14.95	20.75	21	22	75.67	88.09	20.77	17.37	9	9	9	10	15.89	-3.22	29.89	35.3	32.46	16.9	30.99	39.08	18	19	6.33	32.74	26.96	34.62	0	0
Kloster	9	12	13	10	73.44	84.17	81.31	87.2	23.47	11.47	19.55	11.48	21	23	79.57	83.87	17.95	16.47	10	9	8	11	-20.9	.78	11.88	9	34.43	35.42	19.36	24.92	19	19	-10.63	10.21	35.69	22.21	0	0
Klotz	9	10	12	10	73.56	66.6	83.42	82.8	24.59	30.83	26.95	21.51	19	22	69.89	83.14	27.51	24.06	10	9	9	10	-17.6	-20	-10.11	-20	19.56	18.03	27.45	38.59	19	19	-18.74	-15.32	18.36	33.24	0	0
Klumpen	11	9	11	12	77.64	67	81.55	81.25	18.24	24.02	19.27	23.03	20	23	72.85	81.39	21.16	20.83	10	9	9	10	-15	-22.78	-9	-16.7	13.82	28.92	28.75	34.29	19	19	-18.68	-13.05	21.98	31.16	0	0
Knall	11	9	12	10	54.18	42.22	41.83	42.1	38.99	40.13	33.47	32.95	20	22	48.8	41.95	38.93	32.43	9	9	9	10	-28.67	-38	-27.44	-64	35.23	31.32	39.2	29.53	18	19	-33.33	-46.68	32.69	38.35	0	0
Knäuel	10	10	11	12	71.7	83.7	84	84.92	24.58	19.62	18.31	24.04	20	23	77.7	84.48	22.5	21.01	9	9	9	10	3.33	9.11	7.78	5.6	23.25	31.11	27.64	30.53	18	19	6.22	6.63	26.81	28.41	0	0
Knecht	11	9	12	11	58.09	53.67	76	74.45	25.41	28.36	26.86	22.68	20	23	56.1	75.26	26.14	24.4	9	10	10	10	-51.22	-32.6	-35.5	-16.5	28.09	25.3	37.13	25.76	19	20	-41.42	-26	27.6	32.59	0	0
Kneifzange	9	11	11	12	81.22	81.64	96.73	88.17	17.04	12.51	4.22	21.62	20	23	81.45	92.26	14.31	16.15	10	9	9	10	-16.5	-23.89	7.78	1.6	39.81	24.23	9.67	18.63	19	19	-20	4.53	32.68	15.01	0	0
Kneipe	10	9	12	11	80	77.33	86.17	89.45	18.23	19.72	18.68	18.55	19	23	78.74	87.74	18.47	18.27	9	9	8	12	15	24.67	-11.38	-12.75	50.87	30.59	18.96	45.46	18	20	19.83	-12.2	41.02	36.46	0	0
Knete	13	7	12	11	72.85	74.29	77.08	80.27	16.98	15.47	23.9	23.96	20	23	73.35	78.61	16.07	23.43	10	8	9	10	5.1	23	30.22	5.9	22.93	32.31	33.23	23.7	18	19	13.06	17.42	28.14	30.45	0	0
Knie	10	11	13	10	87.8	87.73	93.15	91.8	9.91	10.94	13.75	8.75	21	23	87.76	92.57	10.2	11.62	9	10	9	10	2.89	3.2	28.11	27.2	28.88	19.19	29.11	27.1	19	19	3.05	27.63	23.55	27.28	0	0
Knoblauch	8	12	12	11	88.88	91.58	86.58	90.82	9.69	8.25	18.18	8.17	20	23	90.5	88.61	8.71	14.15	8	10	9	10	48.25	8	-23.67	5	31.66	20.19	44.01	43.69	18	19	25.89	-8.58	32.43	45.08	0	0
Knöchel	9	11	11	12	83.44	80.09	86.27	87.08	14.13	16.52	17.55	17.37	20	23	81.6	86.7	15.19	17.06	9	10	9	10	-15.33	3.6	15.56	9.1	15.47	26.21	29.41	25.8	19	19	-5.37	12.16	23.32	26.98	0	0
Knochen	10	11	12	11	87	90.18	87.5	88.18	22.27	12.29	20.3	12.44	21	23	88.67	87.83	17.36	16.63	11	8	9	10	-19.27	-7.13	-3	2.6	34.04	13.93	21.59	35	19	19	-14.16	-.05	27.52	28.77	0	0
Knödel	11	8	13	9	83.55	85.13	93.69	87.33	13.38	14.39	8.14	17.96	19	22	84.21	91.09	13.44	13.07	9	9	10	9	33.78	20.89	53.6	38.56	31.95	28.96	23.28	31.51	18	19	27.33	46.47	30.31	27.78	0	0
Knopf	10	9	11	12	82.1	93.56	95.64	88.08	14.81	8.4	7.66	15.52	19	23	87.53	91.7	13.25	12.73	9	9	10	9	13.11	6.89	18	30.78	19.74	10.26	24.87	32.55	18	19	10	24.05	15.6	28.69	0	0
Knospe	8	12	13	10	86	83.08	94.15	88.2	14.66	17.22	8.21	12.62	20	23	84.25	91.57	15.91	10.54	9	10	9	10	50.44	54.2	60.67	55.2	26.28	32.07	25.69	27.26	19	19	52.42	57.79	28.72	25.93	0	0
Knüppel	10	10	13	9	82.2	83.6	82.54	82.11	10.16	14.84	28.15	19.38	20	22	82.9	82.36	12.4	24.41	10	8	9	10	-42.5	-56	-27.56	-41.3	16.57	30.19	32.58	34.3	18	19	-48.5	-34.79	23.84	33.32	0	0
Kobold	11	11	12	11	68.27	73	64.33	61.64	23.32	15.52	22.52	25.48	22	23	70.64	63.04	19.48	23.46	9	9	9	10	.89	27.22	.22	6	47.23	42.86	38.29	37.54	18	19	14.06	3.26	45.8	36.95	0	0
Kobra	9	11	12	10	89.78	86	88.5	71.5	12.75	15.17	15.2	26.88	20	22	87.7	80.77	13.9	22.49	9	9	10	8	15.67	-13	-39.5	-44.38	24.11	37.79	68.5	33.81	18	18	1.33	-41.67	34.1	54.42	0	0
Koch	11	10	13	10	77.36	81.5	88.69	83.5	12.82	14.58	12.47	15.15	21	23	79.33	86.43	13.5	13.62	9	10	9	10	38.11	38.5	41	43.1	24.6	39.75	28.3	31.09	19	19	38.32	42.11	32.55	28.99	0	0
Kochlöffel	8	12	12	11	89.75	89.33	90.75	92.36	15.61	11.32	11.72	7.28	20	23	89.5	91.52	12.8	9.67	11	8	10	9	11.82	25	33.5	18.33	25.19	27.03	33.33	20.98	19	19	17.37	26.32	26.1	28.49	0	0
Kochtopf	11	9	12	11	87.73	90.22	96.92	92.27	17.06	7.98	5.73	11.31	20	23	88.85	94.7	13.48	8.95	12	7	10	10	23.42	15.71	42.5	24.2	19.71	25.93	29.96	23.43	19	20	20.58	33.35	21.82	27.81	0	0
Koffer	9	10	12	10	89.56	94.6	96.08	89.6	11.51	6.2	4.56	9.29	19	22	92.21	93.14	9.21	7.67	10	9	9	10	13	35.56	25	27.9	20.52	33.62	23.75	25.23	19	19	23.68	26.53	29.1	23.9	0	0
Kofferraum	10	10	12	11	81.1	84.9	92.5	86.64	17.01	13.74	13.99	12.45	20	23	83	89.7	15.18	13.32	9	9	10	9	7.22	-1.67	18.5	1.89	27.98	14.66	41.24	13.96	18	19	2.78	10.63	22.15	31.77	0	0
Kohl	10	10	11	11	88.3	76	95	86.09	10.18	17.02	6.51	18.73	20	22	82.15	90.55	15.04	14.42	10	8	8	12	15.2	-1.13	24.25	32.33	24.5	8.84	27.95	27.91	18	20	7.94	29.1	20.48	27.48	0	0
Kohle	10	11	14	9	81.4	87.45	94.43	82.78	18.43	9.81	9.62	26.67	21	23	84.57	89.87	14.51	18.63	9	10	8	11	11.33	.4	38.38	10.73	23.97	9.43	27.95	26.74	19	19	5.58	22.37	18.2	29.96	0	0
Kohlrabi	11	10	13	9	81.82	84.6	97.54	86.67	14.55	20.1	3.97	14.36	21	22	83.14	93.09	17.02	10.84	9	9	9	10	6.78	5.89	48.67	45.9	26.84	25.96	25.22	24.76	18	19	6.33	47.21	25.62	24.32	0	0
Kokosnuss	9	11	13	10	91	91.91	93.38	85.5	12.27	12.91	12.69	18.52	20	23	91.5	89.96	12.3	15.62	10	9	10	9	37.9	35.56	49.3	23.44	22.05	42.46	23.78	14.51	19	19	36.79	37.05	32.34	23.5	0	0
Kolibri	10	11	13	10	80.2	88.55	93.54	78.4	18.03	9.45	13	32.01	21	23	84.57	86.96	14.46	23.88	9	10	9	10	38.22	46.4	65.11	43.5	18.96	30.08	25.49	27.43	19	19	42.53	53.74	25.09	28.07	0	0
Kollege	11	10	13	10	48.64	52.1	62.08	78.1	25.93	28.1	31.6	20.6	21	23	50.29	69.04	26.36	28.01	10	8	10	9	23.1	17.88	49.5	47.67	21.61	19.61	36.75	26.72	18	19	20.78	48.63	20.32	31.52	0	0
Komet	11	10	12	11	89.64	64.9	82.17	74.55	9.06	26.91	22.69	34.01	21	23	77.86	78.52	22.96	28.26	11	7	10	9	22.55	25.86	28.8	14.44	47.09	18.42	33.24	14.17	18	19	23.83	22	37.78	26.38	0	0
Komma	10	11	13	10	88.7	79	85.23	92.4	16.34	15.95	23.99	6.75	21	23	83.62	88.35	16.49	18.6	9	10	11	8	.56	1.7	-.09	-1.13	8.02	3.3	21.47	17.51	19	19	1.16	-.53	5.86	19.38	0	0
Kommissar	11	9	12	11	49.91	55.22	49.5	62.64	17.31	21	28.81	35.34	20	23	52.3	55.78	18.73	32.06	9	9	8	11	9.89	-1.89	-12.25	-1.64	30.67	10.97	38.38	27.92	18	19	4	-6.11	23.15	32.17	0	0
Kommode	12	9	11	11	73.17	81.67	81.73	88.82	24.82	22.38	26.32	20.3	21	22	76.81	85.27	23.62	23.22	8	10	8	11	10	10.4	9.63	19.09	12.51	10.32	11.19	27.3	18	19	10.22	15.11	10.99	22.04	0	0
Kompass	11	9	12	10	91.09	93.22	95.25	88.4	9.2	8.7	7.72	20.16	20	22	92.05	92.14	8.81	14.75	8	10	10	10	27.13	19	46.1	21.4	21.55	24.37	37.57	19.59	18	20	22.61	33.75	22.87	31.8	0	0
Komponist	11	9	13	10	55.55	53.78	60.08	63.8	26.88	25.15	38.24	22.75	20	23	54.75	61.7	25.44	31.83	9	10	10	9	25.22	45.7	47.4	46.22	29.75	36.62	32.97	26.7	19	19	36	46.84	34.26	29.34	0	0
Kompost	11	9	11	12	72.36	78.33	85.45	81.08	17.22	19.86	16.54	19.93	20	23	75.05	83.17	18.21	18.11	10	8	7	12	8.1	7.75	5.43	-14.42	14.66	27.65	27.18	39.67	18	19	7.94	-7.11	20.71	36.12	0	0
Kompott	12	9	13	10	62.75	86.78	89.46	86.3	27.16	12.86	12.14	15.01	21	23	73.05	88.09	24.91	13.23	9	10	10	9	8.11	34.7	41.6	44.33	27.73	32.37	55.57	36.91	19	19	22.11	42.89	32.43	46.38	0	0
Konditor	9	9	10	13	63	56.89	84.6	82.38	29.34	24.85	24.54	16.93	18	23	59.94	83.35	26.57	20.1	8	10	10	9	18.13	29.4	53.8	54.11	19.24	30.42	30.86	35.03	18	19	24.39	53.95	25.99	31.96	0	0
Konferenz	11	9	14	9	53.91	40.78	72.36	58.78	26.81	20.8	19.98	33.96	20	23	48	67.04	24.61	26.48	8	10	10	9	-10.5	-1.6	-11.7	8.78	28.18	23.74	32.08	25.15	18	19	-5.56	-2	25.42	30.1	.04	0
Konfetti	11	8	13	10	85.82	87.88	92.46	92.2	9.27	13.27	13.18	8.4	19	23	86.68	92.35	10.83	11.12	7	11	9	10	17.14	38.82	19.67	22.4	37.28	41.46	43.27	34.37	18	19	30.39	21.11	40.25	37.75	0	0
König	12	10	13	10	77.67	83.1	71.69	71	20.39	24.33	32.22	20.3	22	23	80.14	71.39	21.89	27.11	9	10	9	10	-6	8.2	-5.33	5.3	43.55	46.01	27.22	35.88	19	19	1.47	.26	44.21	31.66	0	0
Königin	10	11	12	11	79	78.91	77.92	77.64	16.1	25.17	21.99	18.05	21	23	78.95	77.78	20.82	19.74	8	10	10	9	22.38	25.1	11.7	7.11	35.78	40.65	35.89	34.02	18	19	23.89	9.53	37.47	34.12	0	0
Konserve	10	10	12	11	73.3	87.7	91.58	76.64	23.78	13.9	13.71	22.35	20	23	80.5	84.43	20.35	19.47	9	9	10	10	2.22	.56	13.1	11.9	24.9	9.36	16.45	25.63	18	20	1.39	12.5	18.27	20.97	0	0
Kontakt	9	11	12	11	32.89	32.36	58.67	41.45	22.98	16.46	31.86	27.49	20	23	32.6	50.43	19.1	30.47	9	9	8	11	33.11	24.67	40.63	48.91	16.5	33.19	28.77	36.58	18	19	28.89	45.42	25.8	32.91	0	0
Kontrabass	10	10	11	12	92.1	90.8	92.91	88.08	10.65	12.65	14.66	13.87	20	23	91.45	90.39	11.4	14.14	10	9	10	9	39.1	28.56	26.8	34.56	46.54	30.2	33.26	33.37	19	19	34.11	30.47	38.96	32.61	0	0
Konzept	10	10	12	11	22.6	24.5	40.83	50.45	16.3	26.4	24.85	34.02	20	23	23.55	45.43	21.38	29.31	9	9	9	10	16.44	10.56	28.44	16.8	21.73	35.26	35.37	19.59	18	19	13.5	22.32	28.57	27.99	0	0
Konzert	10	10	11	11	66	68.5	71.82	80.18	28.38	24.61	26.72	27.24	20	22	67.25	76	25.89	26.68	8	10	8	11	61.13	57.9	58.13	80.27	31.87	31.19	27.48	16.14	18	19	59.33	70.95	30.59	23.76	0	0
Kopf	11	10	12	11	87.09	92.7	97.33	92.64	13.25	9.29	3.2	11.53	21	23	89.76	95.09	11.61	8.45	9	10	9	10	24	20.1	25.56	41.3	36.86	28.11	14.57	34.75	19	19	21.95	33.84	31.67	27.63	0	0
Kopftuch	9	12	13	10	88.67	92.33	93.92	89	9.29	8.22	8.6	18.92	21	23	90.76	91.78	8.67	13.89	9	10	8	11	-10.89	-16.7	-11.25	15.82	43.66	38.51	37.34	39.95	19	19	-13.95	4.42	39.97	40.22	0	0
Kopfweh	8	11	13	10	33.88	51	53.23	66.3	34.79	28.5	33.08	35.47	19	23	43.79	58.91	31.58	33.99	11	7	8	11	-56	-57.86	-40.13	-62.55	26.31	32.25	28.18	26.41	18	19	-56.72	-53.11	27.84	28.73	0	0
Kopierer	11	11	12	11	81.64	88.82	84	84.64	18.46	12.67	25.47	19.73	22	23	85.23	84.3	15.88	22.39	9	10	10	9	.56	3.8	31.8	23.89	22.16	12.11	27.96	35.64	19	19	2.26	28.05	17.16	31.17	0	0
Koralle	10	10	13	10	88.5	85.2	87.54	83.8	11.58	11.92	15.08	20.53	20	23	86.85	85.91	11.56	17.32	8	9	8	11	39.5	58	38.38	30.64	34.91	34.7	36.66	21.11	17	19	49.29	33.89	35.01	28.03	.03	0
Korb	9	9	13	10	83.67	87.89	91.08	84	12.96	10.07	11.94	21.06	18	23	85.78	88	11.47	16.49	8	10	8	11	19.75	15.2	18.13	22.27	17.45	28.26	13.23	25.5	18	19	17.22	20.53	23.53	20.82	0	0
Korken	8	11	11	12	86	88.36	91.73	86.33	15.75	11.36	11.82	18.16	19	23	87.37	88.91	13.02	15.36	6	12	9	10	16.17	21.5	10.67	12.2	21.56	25.96	17.92	15.6	18	19	19.72	11.47	24.07	16.28	0	0
Korn	10	10	13	10	73.5	85.7	88.62	86.1	29.09	13.19	16.95	12.18	20	23	79.6	87.52	22.86	14.8	8	10	10	9	42.13	26.1	25.6	23.78	25.08	28.24	28.42	22.05	18	19	33.22	24.74	27.36	24.92	0	0
Kornblume	8	11	14	9	54.5	83.91	94.79	83.89	30.7	17.94	7.91	21.79	19	23	71.53	90.52	27.71	15.47	9	9	8	11	31.44	58.33	66.13	50	26.04	39.22	22.69	29.63	18	19	44.89	56.79	35.14	27.48	0	0
Kornfeld	9	10	11	11	79.78	84.3	93.36	91	18.23	11.36	8.52	15.83	19	22	82.16	92.18	14.75	12.47	9	10	10	9	38.89	50.3	52.5	39.56	28.84	37.84	30.34	19.74	19	19	44.89	46.37	33.46	26.03	0	0
Körper	11	9	13	10	79.18	86.56	85.46	82.7	19.43	17.29	17.63	19.44	20	23	82.5	84.26	18.41	18.06	10	9	9	10	21.1	44.67	34.22	31	29.47	36.03	31.39	22.4	19	19	32.26	32.53	34.02	26.3	0	0
Korsett	9	11	11	12	79.56	81	84.64	85.58	23.2	14.09	12.05	17.46	20	23	80.35	85.13	18.21	14.79	9	9	10	9	2.44	-28.44	-25.7	-23.56	44.69	41.19	31.14	39.43	18	19	-13	-24.68	44.62	34.31	0	0
Kosak	10	6	10	12	66.5	43.67	80.5	71.5	35.22	20.07	20.71	31.75	16	22	57.94	75.59	31.76	27.07	10	9	8	11	4.4	6.11	-17.75	-3.45	32.86	13.55	47.33	14.6	19	19	5.21	-9.47	24.95	32.28	.13	.04
Kosten	11	10	12	11	28	19.3	39.33	37.82	25.32	19.32	31.72	29.6	21	23	23.86	38.61	22.55	30.03	10	9	9	10	-48.2	-46.22	-33.78	-32	38.81	31.31	41.93	45.31	19	19	-47.26	-32.84	34.5	42.53	0	0
Kostüm	11	9	12	10	62.27	80.89	81.5	82.3	25.11	18.06	21.72	21.06	20	22	70.65	81.86	23.65	20.92	9	9	8	11	4.89	51.56	32	34.36	21.82	39.32	24.52	26.34	18	19	28.22	33.37	39.09	24.91	0	0
Kotelett	9	11	12	11	80.56	83.55	95.08	93.73	16	14.17	6.27	6.08	20	23	82.2	94.43	14.69	6.08	9	10	10	9	25.22	22	34	23.78	30.8	30.13	28.08	36.7	19	19	23.53	29.16	29.64	31.94	0	0
Krabbe	12	8	13	10	83.17	88.13	90.23	81.9	14.65	14.27	9.7	18.64	20	23	85.15	86.61	14.34	14.53	10	9	8	11	26.6	17.56	12	16.45	23.9	22.22	26.52	31.69	19	19	22.32	14.58	22.95	28.92	0	0
Kraft	11	11	12	11	47.36	35.55	38.92	44.64	31.09	25.16	34.24	32.07	22	23	41.45	41.65	28.25	32.59	10	8	8	11	20.2	50.13	38.25	45.09	25.37	25.77	16.97	33.84	18	19	33.5	42.21	29.12	27.57	0	0
Kragen	10	9	12	11	67.7	82	90.75	83	33.99	13.68	10.21	22.66	19	23	74.47	87.04	26.73	17.36	10	8	8	11	-7.7	-.38	20.63	23.18	15.88	23.1	20.41	28.95	18	19	-4.44	22.11	19.16	25.09	0	0
Krähe	11	9	14	9	85.45	87.44	96.93	89	22.12	11.8	4.7	11.61	20	23	86.35	93.83	17.81	8.81	10	9	9	10	-8.4	-7.22	18.33	-8	43.67	17.5	55.93	43.81	19	19	-7.84	4.47	33.02	50.32	0	0
Kralle	12	10	11	12	83.67	83.9	85.09	82.17	12.12	9.46	17.92	25.74	22	23	83.77	83.57	10.73	21.9	9	10	9	10	-11.33	-36.1	-26.11	-23.1	15.59	32.86	29.66	16.82	19	19	-24.37	-24.53	28.45	23.13	0	0
Kran	10	10	13	10	83.5	90.6	92.77	85.2	19.98	4.62	8	18.21	20	23	87.05	89.48	14.58	13.61	10	8	9	10	8.9	-9.88	14.33	13.8	20.07	19.1	13.04	24.27	18	19	.56	14.05	21.35	19.24	0	0
Kranführer	11	10	13	10	64.64	54.7	76.62	89.3	29.28	23.2	26.84	12.82	21	23	59.9	82.13	26.39	22.39	8	10	9	10	12.13	-3.8	8.44	17.3	12.53	14.66	12.94	22.64	18	19	3.28	13.11	15.64	18.74	0	0
Kranker	9	10	12	11	54.33	52.2	76	69.82	27.37	26.11	24.54	31.21	19	23	53.21	73.04	25.98	27.45	9	9	10	10	-48.44	-54.78	-60	-57.5	30.24	33.45	37.61	28.85	18	20	-51.61	-58.75	31.11	32.64	0	0
Krankheit	11	10	13	10	48	35.9	64.15	61.3	33.07	26.88	34.51	35.08	21	23	42.24	62.91	30.17	33.99	13	13	12	13	-60.15	-85.77	-71.58	-73.85	23.79	24.82	41.86	49.12	26	25	-72.96	-72.76	27.16	44.84	0	0
Kranz	10	9	12	11	79.7	84.22	96.83	85.09	21.02	9.2	3.79	16.02	19	23	81.84	91.22	16.25	12.64	9	11	9	10	.67	4.73	-8.67	.1	18.94	21.77	52.05	15.43	20	19	2.9	-4.05	20.12	36.65	0	0
Kraut	10	10	11	11	64.5	62.2	77.55	83.45	26.93	22.07	25.77	24.03	20	22	63.35	80.5	24	24.5	11	7	9	10	10.27	6.86	22	26.1	22.15	28.26	25.72	27.33	18	19	8.94	24.16	23.94	25.92	0	0
Krawatte	10	11	12	11	90.2	92.36	96	92.27	15	8.69	6.66	9.71	21	23	91.33	94.22	11.84	8.28	10	8	9	10	-.8	3.75	25.78	32.8	42.03	13.82	25.85	28.27	18	19	1.22	29.47	31.93	26.64	0	0
Krebs	10	10	11	11	94.4	95.8	85.55	78	7.34	4.89	28.69	23.65	20	22	95.1	81.77	6.11	25.95	9	9	10	9	-31.44	-40.44	-36.3	-54.67	56.66	55.09	39.97	44.36	18	19	-35.94	-45	54.41	41.98	0	0
Kreide	11	9	13	10	81.27	81.22	90.08	77.5	23.59	16.31	12.2	24.57	20	23	81.25	84.61	20.12	19.2	9	9	8	11	6.22	3	14.5	16.82	21.14	26.31	14.62	23.27	18	19	4.61	15.84	23.21	19.63	0	0
Kreis	14	15	15	17	95.57	92.53	97.27	88.94	7.44	13.42	3.69	11.18	29	32	94	92.84	10.87	9.41	8	11	8	11	5.38	16.82	7.38	17	11.36	19.86	7.65	15.49	19	19	12	12.95	17.41	13.41	0	0
Kreisel	12	10	13	9	80.25	77.9	83.23	84.22	17.96	16.18	23.94	22.98	22	22	79.18	83.64	16.81	23	10	8	8	11	17.3	31.88	9.13	13.09	15.8	24.98	13.11	30.03	18	19	23.78	11.42	21.09	23.91	0	0
Kreislauf	9	10	12	11	65.67	37.8	48.17	61.73	34.2	30.46	38.79	29.71	19	23	51	54.65	34.47	34.66	10	8	8	11	20.4	14.75	31.75	24.27	26.57	21.7	33.04	34.51	18	19	17.89	27.42	24	33.17	0	0
Kreissäge	11	8	11	11	82.91	83.75	93.36	83.27	21.23	13.57	7.83	19.61	19	22	83.26	88.32	17.95	15.46	10	8	10	9	-25.6	-34.88	-4.4	-14.44	23.91	26.04	39.12	33.01	18	19	-29.72	-9.16	24.58	35.72	0	0
Kresse	10	9	12	11	67.2	80.89	79.83	84.18	17.28	17.3	23.74	23.05	19	23	73.68	81.91	18.21	22.99	9	10	9	10	27.67	17.5	31.11	33.1	20.22	35.81	21.95	22.85	19	19	22.32	32.16	29.16	21.82	0	0
Kreuz	11	10	11	11	90	93.2	92.73	90.91	9.47	12.66	11.49	12.03	21	22	91.52	91.82	10.93	11.52	9	9	9	10	-21.56	-12.33	19.56	-6.4	55.94	14.53	36.98	41.98	18	19	-16.94	5.89	39.93	40.82	0	0
Krieg	8	11	13	10	75	58.45	70.31	73.8	31.1	30.51	28.77	33.09	19	23	65.42	71.83	31.05	30.04	7	11	9	10	-71.14	-85.64	-83.11	-91.6	34.03	20.4	25.41	9.83	18	19	-80	-87.58	26.58	18.82	0	0
Krieger	12	9	12	10	76.17	68.78	75.92	61.2	17.24	13.19	24.54	35.14	21	22	73	69.23	15.72	30.01	10	9	11	8	-13	-36.22	-62.18	-60.13	59	43.48	38.17	26.12	19	19	-24	-61.32	52.18	32.8	0	0
Krise	10	10	13	10	30.7	22.4	37.08	36.3	29.53	21.88	34.26	29.99	20	23	26.55	36.74	25.65	31.75	10	8	9	10	-47.1	-58.13	-46.56	-50.9	23.02	40.13	23.21	30.3	18	19	-52	-48.84	31.23	26.52	0	0
Kristall	9	11	10	11	73.78	72.45	77.7	81.45	23.3	21.65	22.82	18.27	20	21	73.05	79.67	21.81	20.12	9	9	10	9	23.67	39.44	45.1	32.67	32.08	33.08	26.6	22.53	18	19	31.56	39.21	32.63	24.9	0	.04
Kritik	9	11	12	11	31.44	18.36	35.08	35.91	26.19	17.49	30.7	25.45	20	23	24.25	35.48	22.24	27.67	9	10	10	10	-8.11	-14.3	-10.1	1	49.11	36.84	26.7	23.3	19	20	-11.37	-4.55	41.96	25.04	0	0
Krokodil	8	12	13	10	93.75	95.83	98.31	91.3	11.27	4.8	2.95	8.69	20	23	95	95.26	7.83	6.95	9	9	9	10	1	-14	-20.78	-26.5	34.6	24.17	50.86	29.03	18	19	-6.5	-23.79	29.96	39.75	0	0
Krone	10	11	12	11	88.5	94	90.58	85.09	15.23	10.13	15.1	16.91	21	23	91.38	87.96	12.79	15.87	8	10	8	11	10.13	27.8	26.75	23.73	33.26	32.13	39.16	36.92	18	19	19.94	25	32.92	36.82	0	0
Kröte	10	11	11	11	91	88.73	95.45	90.45	10	18.86	4.59	13.65	21	22	89.81	92.95	14.97	10.26	8	10	9	10	5.63	-1.5	5.33	-18.4	37.26	24.71	42.8	37.73	18	19	1.67	-7.16	30.13	40.92	0	0
Krücke	9	11	13	10	86.89	88.64	84.54	88.1	20.97	6.73	24.79	16.94	20	23	87.85	86.09	14.49	21.35	10	8	9	10	-30.9	-41.25	-22	-53	26.43	26.4	48.11	33.48	18	19	-35.5	-38.32	26.17	42.92	0	0
Krug	10	11	13	10	80.5	93.45	94.77	88.6	31.74	5.82	6	19.12	21	23	87.29	92.09	22.68	13.38	10	8	9	10	28.9	14	28.44	26.1	26.88	17.53	20.4	18.22	18	19	22.28	27.21	23.81	18.77	0	0
Kübel	11	10	11	12	63.55	69.2	86.36	79.92	31.57	26.25	13.46	22.66	21	23	66.24	83	28.58	18.7	10	9	9	10	-7.4	-7.89	19.78	-3	18.49	18.56	17.87	22.92	19	19	-7.63	7.79	18	23.26	0	0
Küche	10	10	13	11	72.1	87.4	94.15	93	27.9	12.83	8.37	8.44	20	24	79.75	93.63	22.55	8.23	9	10	10	9	22.44	35.3	32.9	45.67	16.16	41.33	30.76	31.83	19	19	29.21	38.95	31.84	31.08	0	0
Kuchen	10	10	12	11	84.5	93.7	98.08	94	12.54	9.48	2.94	8.69	20	23	89.1	96.13	11.8	6.56	7	12	10	9	25.29	48.42	66.6	49.11	26.36	31.02	29.48	26.8	19	19	39.89	58.32	30.84	28.88	0	0
Kuckuck	11	9	11	12	73.73	87.22	92.18	84.83	24.32	13.67	10.79	16.2	20	23	79.8	88.35	20.92	14.08	8	11	9	10	24.5	23.45	48	45.4	30.74	22.52	28.52	25.62	19	19	23.89	46.63	25.49	26.3	0	0
Kugel	10	10	12	11	91.6	94.7	93	89.73	10.07	8.12	10.77	15.83	20	23	93.15	91.43	9.05	13.22	7	11	10	9	-12	22.45	3.1	7.11	29.46	37.78	47.01	14.55	18	19	9.06	5	38.01	34.69	0	0
Kuh	11	10	11	11	95	94.9	97.36	92.45	7.4	5.28	3.67	11.8	21	22	94.95	94.91	6.32	8.89	9	9	8	11	18.33	25.89	45.63	28.18	18.3	32.32	28.22	21.68	18	19	22.11	35.53	25.77	25.48	0	0
Kuhstall	12	9	14	9	82.17	83.44	87.71	89.11	16.16	19.28	11.99	14.46	21	23	82.71	88.26	17.11	12.71	8	10	8	11	13.63	3.4	43.88	-6.18	28.5	20.99	33.69	45.36	18	19	7.94	14.89	24.39	47.21	0	0
Kuhweide	10	10	13	10	74.8	79.6	89.31	73.1	23.7	19.81	12.46	21.85	20	23	77.2	82.26	21.4	18.64	9	9	10	9	20.44	20.89	34.5	6.11	17.38	19.93	20.78	32.64	18	19	20.67	21.05	18.14	30.02	0	0
Küken	9	9	14	9	94.44	90.67	97.21	91.56	6.48	10.17	4.08	8.17	18	23	92.56	95	8.5	6.49	9	10	9	10	39.56	52.9	65.56	53.7	22.38	30.9	26.57	28.62	19	19	46.58	59.32	27.33	27.57	0	0
Kulisse	13	9	12	11	47	66.67	58.17	75.73	23.22	22.89	27.54	25.21	22	23	55.05	66.57	24.61	27.36	9	10	9	10	10	31.3	4	19.3	25.11	23.37	33.43	20.22	19	19	21.21	12.05	25.93	27.62	0	0
Kult	11	10	12	11	30.91	25.5	39.42	40.82	28.75	31.05	33.04	29.82	21	23	28.33	40.09	29.24	30.83	8	10	8	11	-14.88	-12.1	5.25	-6.55	29.27	37.16	20.17	38.25	18	19	-13.33	-1.58	32.95	31.73	0	0
Kümmel	12	9	14	8	73.08	84.56	90.86	84.5	29.87	16.09	11.1	20.03	21	22	78	88.55	25.06	14.83	9	9	9	10	7.11	1.78	37.56	15.1	26.19	9.59	26.02	27.92	18	19	4.44	25.74	19.33	28.7	0	0
Kummer	10	10	11	12	25	33	36.73	50.58	19.44	20.94	24.2	36.64	20	23	29	43.96	20.09	31.42	8	10	8	11	-65.13	-57.8	-50.88	-69.55	21.7	30.65	38.72	28.56	18	19	-61.06	-61.68	26.56	33.55	0	0
Kunde	9	12	11	12	48.78	40.58	61.82	72.67	30.86	25.39	34.19	30.43	21	23	44.1	67.48	27.44	32.02	9	10	8	11	4.44	14.7	30	30.64	27.76	16.48	25.88	30.05	19	19	9.84	30.37	22.49	27.61	0	0
Kunst	12	9	13	10	51.58	54.56	49.23	56.2	30.74	27.26	33.51	36	21	23	52.86	52.26	28.63	33.99	8	11	10	9	22.75	47.91	50.3	69.22	29.05	37.25	22.47	33.58	19	19	37.32	59.26	35.52	29.12	0	0
Künstler	10	10	13	10	45.2	58	71.77	73.8	22.09	9.88	30.83	25.65	20	23	51.6	72.65	17.9	28.09	8	10	8	11	34.5	50.3	33.5	53.91	35.88	36.3	19.21	18.99	18	19	43.28	45.32	35.95	21.23	0	0
Kunststück	10	10	12	11	49.8	26.1	51.33	68.09	25.74	22.5	22.95	28.64	20	23	37.95	59.35	26.48	26.63	11	8	9	10	25.09	49.38	28.56	25.7	15.74	33.74	24.31	23.3	19	19	35.32	27.05	27.06	23.16	0	0
Kupfer	9	10	12	10	57.78	70.4	70.75	79.1	38.68	21.71	28.43	21.33	19	22	64.42	74.55	30.7	25.22	9	9	10	9	13.22	-1.33	18.1	15	14.59	5.81	25	33.15	18	19	5.94	16.63	13.12	28.34	0	0
Kürbis	11	8	13	10	89.27	94	92.38	90.1	16.28	6.82	13.84	11.58	19	23	91.26	91.39	13.08	12.68	11	8	8	11	30.91	42	36	37.09	30.91	38.63	34.01	33.47	19	19	35.58	36.63	33.81	32.75	0	0
Kurgast	8	11	11	12	42.63	48.64	67.45	68.5	22.34	18.54	35.6	26.65	19	23	46.11	68	19.86	30.52	9	9	9	10	2.33	11	26.78	35.3	26.18	27.26	24.77	33.37	18	19	6.67	31.26	26.31	29.13	0	0
Kurs	10	9	13	10	40.9	32.78	48	50.5	32	22.75	32.07	34.93	19	23	37.05	49.09	27.56	32.58	9	9	10	9	22.22	15.33	15.8	24.89	29.52	16.37	15.99	27.5	18	19	18.78	20.11	23.43	22.04	0	0
Kurve	12	8	12	11	81	67.25	87.83	79.82	18.76	23.99	21.54	18.03	20	23	75.5	84	21.53	19.91	11	8	10	9	24.91	-.75	4.4	21.67	32.24	15.06	21.47	25.89	19	19	14.11	12.58	28.9	24.64	0	0
Kusine	11	11	13	10	41.91	49.36	60.85	84.3	31.89	33.32	40.43	27.88	22	23	45.64	71.04	32.06	36.75	8	10	10	9	28.13	24.7	46.7	29.89	32.58	33.22	36.65	37.3	18	19	26.22	38.74	32	36.94	0	0
Kuss	10	10	13	10	75.6	85.7	88.08	91.1	29.67	24.94	17.04	9.13	20	23	80.65	89.39	27.17	13.96	13	13	12	13	75.62	84.08	83.58	83.54	34.86	21	15.99	20.56	26	25	79.85	83.56	28.53	18.12	0	0
Küste	12	10	12	11	74.83	83.1	92	81.91	24.76	11.47	9.21	15.64	22	23	78.59	87.17	19.88	13.43	9	10	10	9	65.22	54	49.8	49.56	26.23	37.3	37.86	32.09	19	19	59.32	49.68	32.17	34.27	0	0
Kutsche	12	8	11	11	85.5	90.13	97.55	85	17.94	9.48	3.98	13.93	20	22	87.35	91.27	14.99	11.88	11	8	9	10	27.27	23	35.22	46.1	23.59	27.47	25.03	24.75	19	19	25.47	40.95	24.64	24.82	0	.04
Kutte	9	10	9	13	81.44	69.4	84.22	83.54	13.03	18.28	21.43	17.74	19	22	75.11	83.82	16.75	18.84	8	11	8	11	-3.75	-6.45	.5	3.27	18.97	18.04	31.2	25.61	19	19	-5.32	2.11	17.96	27.29	0	0
Labyrinth	11	9	12	11	73.45	92.22	74.75	77.64	21.63	7.74	27.05	20.7	20	23	81.9	76.13	19.06	23.73	10	8	11	8	-4.3	9.63	-40.27	-16.75	47.93	40.81	36.11	27.64	18	19	1.89	-30.37	44.19	34.12	0	0
Lachs	10	10	11	12	75.8	82.9	93.64	85.75	30.78	20.29	12.56	17.62	20	23	79.35	89.52	25.63	15.59	8	10	10	9	22.5	32.1	43	41.89	35.2	27.07	32.14	38.44	18	19	27.83	42.47	30.37	34.26	0	0
Laden	10	10	11	11	74.4	74.3	90.36	81.45	23.14	12.6	9.33	20.07	20	22	74.35	85.91	18.13	15.94	8	10	9	11	16.63	11.5	20.22	27.73	18.02	15.88	23.66	27.84	18	20	13.78	24.35	16.56	25.66	0	0
Lage	10	9	13	10	23.2	18.22	35.23	42.3	17.45	18.43	27.22	39.14	19	23	20.84	38.3	17.6	32.31	9	10	8	11	1.56	3.4	2.38	4.82	13.61	19	6.52	12.21	19	19	2.53	3.79	16.24	10.05	0	0
Lager	11	9	13	10	71.64	58.44	71.38	66.8	23.3	24.31	27.8	30.51	20	23	65.7	69.39	24.08	28.42	9	9	10	10	-20	-19	21.2	-8	37.81	37.05	20.94	46.44	18	20	-19.5	6.6	36.32	38.13	0	0
Laken	9	10	11	12	87.11	86.9	95.18	88.83	15.85	11.85	6.75	9.92	19	23	87	91.87	13.48	8.97	10	9	10	9	10.8	11.33	23.5	26.67	27.63	20.27	29.66	25.78	19	19	11.05	25	23.76	27.17	0	0
Lakritze	11	9	12	10	76.09	87	90.08	81.2	21.6	12.82	13.25	24.4	20	22	81	86.05	18.6	19.17	8	10	9	10	16.13	5.4	9.44	20.6	41.56	32.14	23.4	36.73	18	19	10.17	15.32	35.89	30.83	0	.03
Lama	11	9	13	10	84	90.11	94.23	87.9	17.16	9.66	8.36	14.52	20	23	86.75	91.48	14.29	11.6	11	7	10	9	17.73	47	36.6	30.11	20.44	30.64	26.7	20.26	18	19	29.11	33.53	28.15	23.45	0	0
Lametta	11	10	13	10	85.82	82.7	89.62	86	15.77	12.58	18	14.06	21	23	84.33	88.04	14.08	16.16	10	8	10	9	-7.2	22.75	19.5	31.44	35.22	34.4	36.87	26.41	18	19	6.11	25.16	37.13	32.05	0	0
Lamm	10	10	13	9	81.4	92.7	95	91.56	15.76	11.7	6.28	8.82	20	22	87.05	93.59	14.7	7.43	9	10	9	10	20.78	37.3	49.22	60.4	20.19	31.11	18.87	22.39	19	19	29.47	55.11	27.15	21.02	0	0
Lampe	10	12	12	11	88.9	94.92	96.58	95.09	7.94	8.38	4.08	6.95	22	23	92.18	95.87	8.56	5.55	8	10	9	11	27.25	12.4	40.56	44.64	23.21	13.75	25.5	26.91	18	20	19	42.8	19.48	25.68	0	0
Land	10	10	12	11	65.8	56.2	87.25	79.27	22.4	32.47	13.22	26.12	20	23	61	83.43	27.59	20.35	9	10	8	11	18.11	22.5	44.13	30.55	23.96	27.87	27.92	28.36	19	19	20.42	36.26	25.46	28.24	0	0
Landhaus	11	8	12	11	82.18	80	91.58	88	18.3	16.46	12.65	15.41	19	23	81.26	89.87	17.11	13.83	9	9	9	10	20.67	43.56	50.56	43.6	24.86	37.48	26.81	23.83	18	19	32.11	46.89	33.03	24.82	0	0
Landschaft	10	10	12	11	68.7	66.4	82.75	83.27	21.84	23.81	14.49	17.96	20	23	67.55	83	22.27	15.86	10	9	9	10	53.2	48.89	56	50.4	23.61	37.08	28.86	29.88	19	19	51.16	53.05	29.91	28.72	0	0
Languste	11	10	12	11	65	72	80.67	79.18	31.06	28.67	21.72	22.04	21	23	68.33	79.96	29.42	21.38	8	10	10	9	18.38	13.4	24.6	13.89	47.6	32.07	44.42	38.64	18	19	15.61	19.53	38.52	41	0	0
Lanze	10	10	12	11	86.8	77.2	90.17	72.55	16.36	19.54	16.02	28.85	20	23	82	81.74	18.22	24.24	10	8	10	9	-13.3	-23.25	-18.9	-21.56	27.16	20.55	38.76	21.74	18	19	-17.72	-20.16	24.3	31.04	0	0
Lappen	10	11	9	13	77.3	86.18	78.33	85.69	18.73	13.91	24.21	18.35	21	22	81.95	82.68	16.59	20.73	10	9	10	10	-3.2	-13	5.7	10	21.21	19.12	15.72	19.04	19	20	-7.84	7.85	20.31	17.13	0	0
Lärche	9	11	12	10	72.89	76.55	94.58	82	28.15	19.01	8.3	27.24	20	22	74.9	88.86	22.96	19.88	10	9	8	11	30	23.89	57.25	48.36	19.33	23.59	27.16	25.82	19	19	27.11	52.11	21.07	26.03	0	0
Larve	8	11	12	11	76.25	73.18	80	81.18	15.49	17.51	19.16	22.85	19	23	74.47	80.57	16.31	20.53	11	8	9	11	-5.27	-12.25	-29.44	-29	19.3	40.06	46.31	27.49	19	20	-8.21	-29.2	29.05	36.07	0	0
Lasso	11	10	13	10	84.09	93.7	93	79.8	14.59	7.17	10.07	19.66	21	23	88.67	87.26	12.4	16.07	9	10	10	9	1.56	14.2	-1.3	-.56	46.66	23.37	42.48	17.29	19	19	8.21	-.95	35.81	32.17	0	0
Last	10	10	11	12	54.5	43.2	66.18	59	33.74	22.98	33.34	34.06	20	23	48.85	62.43	28.69	33.15	9	9	11	8	-44.78	-44	-45.18	-46.88	26.19	16.61	30.81	30.18	18	19	-44.39	-45.89	21.27	29.71	0	0
Lastwagen	9	10	12	11	83.22	89.3	97.42	92.55	20.47	11.95	3.82	10.32	19	23	86.42	95.09	16.35	7.87	8	10	9	11	-18.63	-15	4.56	-9.36	34.33	18.71	22.95	33.73	18	20	-16.61	-3.1	25.96	29.52	0	0
Laterne	10	9	13	10	83	85.67	95.62	88.8	15.94	16.6	5.52	18.13	19	23	84.26	92.65	15.85	12.77	9	10	9	11	21.78	30.2	33.44	39	19.07	21.85	20.6	26.57	19	20	26.21	36.5	20.47	23.63	0	0
Laub	10	10	14	9	76.9	87.6	89.21	89.78	18.13	13.91	17.84	13.41	20	23	82.25	89.43	16.66	15.92	9	10	8	11	20.22	32.8	14	7.09	26.02	25.22	35.78	34.18	19	19	26.84	10	25.7	34.05	0	0
Laube	10	10	11	12	65.2	75.1	91	87.75	24.67	21.01	11.16	16.4	20	23	70.15	89.3	22.87	13.93	9	9	9	10	28.44	15.56	28.78	41.9	19.42	30.35	27.42	16.22	18	19	22	35.68	25.59	22.61	0	0
Lauch	9	12	12	11	63.22	89.5	83.83	86.55	32.48	9.1	17.53	18	21	23	78.24	85.13	25.4	17.4	12	7	9	10	28.83	13.86	32.89	40.8	20.73	14.47	28.05	25.37	19	19	23.32	37.05	19.69	26.23	0	0
Laune	12	8	12	11	25.58	25.75	39.42	43.82	21.79	20.67	35.85	37.46	20	23	25.65	41.52	20.79	35.85	11	8	8	11	20.09	21.88	9	3.18	34.65	46.5	22.8	30.81	19	19	20.84	5.63	38.84	27.17	0	0
Laus	10	10	12	11	71.9	82.9	89.75	82.73	18.16	18.27	12.76	22.62	20	23	77.4	86.39	18.61	18.08	8	11	9	10	-31	-39.27	-79.11	-73.8	50.3	31.71	22.45	31.99	19	19	-35.79	-76.32	39.5	27.26	0	0
Laut	10	10	11	11	47.3	26.3	37.45	35.82	39.45	25.26	41.72	38.81	20	22	36.8	36.64	33.99	39.33	9	10	10	9	-1.56	8.9	-14.9	-5.33	18.83	20.15	38.37	35.27	19	19	3.95	-10.37	19.73	36.24	0	0
Lava	12	9	11	12	88.33	82.44	89.55	67	10.38	15.3	11.49	28.55	21	23	85.81	77.78	12.72	24.5	10	8	9	10	5.3	-7.38	-28.56	-47	32.19	40.55	51.28	29.76	18	19	-.33	-38.26	35.6	41.24	0	0
Lawine	11	10	12	11	73.18	80	80	84.64	28.42	17.34	19.54	13.59	21	23	76.43	82.22	23.48	16.75	10	9	9	10	-27.8	-42.78	-54.89	-60.8	34.87	48.86	34.09	29.56	19	19	-34.89	-58	41.57	31.03	0	0
Leben	10	10	12	11	36.3	22.9	57.75	59.45	32.43	24.39	36.59	37.82	20	23	29.6	58.57	28.76	36.33	8	10	10	9	70.25	72.6	75.9	76.11	21.5	33.24	27.64	25.4	18	19	71.56	76	27.87	25.86	0	0
Leber	11	10	12	11	72.45	70.9	85.92	81.64	28.55	19.59	15.1	20.5	21	23	71.71	83.87	24.1	17.6	10	8	8	11	-18.1	-4.38	22.75	-.91	34.06	13.76	28.82	31.38	18	19	-12	9.05	27.23	31.84	0	0
Leberfleck	11	9	13	9	79.55	96	87.92	90.44	22.08	4.39	24.81	10.2	20	22	86.95	88.95	18.31	19.82	9	10	9	10	-1.22	-7.1	-10.78	-10.8	39.52	38.81	17.52	34.6	19	19	-4.32	-10.79	38.16	27.11	0	0
Leder	12	10	11	12	75.33	72.4	86.64	83.42	17.57	18.26	16.21	24.91	22	23	74	84.96	17.52	20.8	9	11	9	10	21.89	12.82	21.89	24.3	21.55	16.82	31.95	16.56	20	19	16.9	23.16	19.13	24.34	0	0
Leere	11	10	11	12	40.55	41	35.18	47.83	32.81	27.55	25.18	34.54	21	23	40.76	41.78	29.66	30.44	8	10	10	9	-38.38	-44.8	-23.1	-19.67	37.91	33.86	25.08	30.99	18	19	-41.94	-21.47	34.78	27.29	0	0
Legende	10	9	12	10	32.6	23	32.08	49.9	34.36	25.02	35.55	36.53	19	22	28.05	40.18	29.88	36.28	7	11	11	8	27.14	34.27	12.18	26.75	20.6	36.57	16.53	29.9	18	19	31.5	18.32	30.81	23.54	0	0
Lehm	10	10	12	11	70.4	74.8	79.58	77.64	24.99	20.55	21.69	22.04	20	23	72.6	78.65	22.39	21.38	8	10	10	9	13.63	14.9	15.5	-3.22	18.82	20.96	35.63	15.01	18	19	14.33	6.63	19.46	28.76	0	0
Lehne	11	10	11	11	72.27	81.4	81.09	81.36	25.66	14.28	23.08	23.79	21	22	76.62	81.23	21.04	22.87	10	8	10	9	23.1	6.63	23.6	34.56	28.53	9.4	25.08	18.84	18	19	15.78	28.79	23.2	22.45	0	0
Lehre	9	11	13	9	25.89	26.09	41.92	47.78	25.1	17.24	33.47	25.16	20	22	26	44.32	20.53	29.83	10	8	10	9	3.6	.75	40.7	34.11	29.77	14.62	26.72	27.94	18	19	2.33	37.58	23.65	26.75	0	0
Lehrer	9	9	11	12	75	64	56.18	86.67	28.89	32.33	32.61	18.53	18	23	69.5	72.09	30.27	29.96	10	8	10	9	3.7	-2.5	21.1	27.56	37.24	27.78	20.07	28.91	18	19	.94	24.16	32.59	24.16	0	0
Lehrerin	10	10	12	11	68.8	57.7	70.67	86.09	28.03	14.45	30.05	15.26	20	23	63.25	78.04	22.44	24.89	11	8	9	10	14.09	3.88	28	34.8	29.79	30.96	33.38	34.6	19	19	9.79	31.58	29.88	33.26	0	0
Lehrling	11	10	13	9	52	53	75.77	74.44	24.27	25.84	26.79	23.61	21	22	52.48	75.23	24.4	24.96	8	10	11	8	9.25	.6	15.36	30.63	23.69	18.76	27.45	25.18	18	19	4.44	21.79	20.9	26.92	0	0
Leiche	11	10	13	10	77.45	86.5	86.62	78.2	17.91	12.93	17.12	26.8	21	23	81.76	82.96	16.03	21.72	9	9	10	9	-79.44	-77.67	-94.4	-92.11	26.79	28.45	8.9	12.45	18	19	-78.56	-93.32	26.82	10.48	0	0
Leier	10	10	11	11	46.3	39.8	59.73	64.55	36.52	29.09	35.91	35.96	20	22	43.05	62.14	32.31	35.16	10	8	8	11	12.5	11	20.5	6.73	37.3	11.7	23.17	34.53	18	19	11.83	12.53	28.17	30.33	0	0
Leim	9	11	13	10	74	81.09	74.54	88.1	17.26	25.71	23.33	19.39	20	23	77.9	80.43	22.05	22.31	10	8	9	10	-3.2	-7.5	8.67	-8.8	19.54	8.02	31.82	20.15	18	19	-5.11	-.53	15.28	27.08	0	0
Leine	10	10	12	10	79.6	77.7	85.25	85.3	16.3	20.74	16.06	20.98	20	22	78.65	85.27	18.18	17.99	10	9	8	11	13.1	-6	-1.38	14.73	21.57	28.06	23.68	21.22	19	19	4.05	7.95	26.05	23.13	0	0
Leinen	10	10	13	10	59.7	70	67.08	79.5	30.2	21.49	30.07	19.6	20	23	64.85	72.48	26.05	26.27	9	9	10	9	9.67	17.89	23.1	26.44	16.72	29.01	26.89	29.69	18	19	13.78	24.68	23.35	27.5	0	0
Leinwand	10	10	11	11	76.8	82.7	88.55	83.45	26.41	15.21	11.94	19.76	20	22	79.75	86	21.19	16.14	10	9	8	11	34.1	36	17.75	28.27	30.98	29.25	7.29	23.71	19	19	35	23.84	29.34	19.01	0	0
Leistung	10	9	12	11	21.7	22.56	42	46	23.15	18.88	31.07	30.58	19	23	22.11	43.91	20.65	30.2	10	9	8	12	-4.5	5.78	37.5	31.58	51.32	41.12	26.68	34.09	19	20	.37	33.95	45.78	30.72	0	0
Leiter	11	10	11	12	82.73	84.1	95.36	88.92	13.88	24.73	8.48	11.11	21	23	83.38	92	19.29	10.26	8	11	10	9	8.75	-.18	24.8	16.11	15.05	16.41	25.89	16.24	19	19	3.58	20.68	16.07	21.73	0	0
Leitung	10	9	11	12	47.5	53.56	58.45	57.58	29.62	30.95	29.79	34.3	19	23	50.37	58	29.57	31.49	8	11	10	9	-14.63	3.18	26.2	6.44	37.24	25.18	22.12	14.12	19	19	-4.32	16.84	31.19	20.88	0	0
Lenker	9	10	11	11	83.22	71.8	71	83	18.47	23.94	34.79	25.43	19	22	77.21	77	21.74	30.36	9	9	10	9	17	6.44	27.1	15.22	26.74	14.54	23.8	13.81	18	19	11.72	21.47	21.58	20.13	0	0
Lenkrad	11	9	13	10	90.09	84.22	97.85	85.1	14.76	13.61	3.67	16.18	20	23	87.45	92.3	14.2	12.5	8	10	9	10	20.5	4.8	26.33	15	36.14	15.1	22.98	13.19	18	19	11.78	20.37	26.89	18.85	0	0
Leopard	11	10	13	10	92.82	80.4	95.15	79.3	7.45	21.86	7.17	24.17	21	23	86.9	88.26	16.83	18.21	9	9	8	11	40.11	23.67	20.75	-8.36	19.62	20.52	51.6	61.23	18	19	31.89	3.89	21.23	57.76	0	0
Lerche	10	10	12	11	77.5	59.7	93.75	87.55	22.03	28.17	9	19.59	20	23	68.6	90.78	26.25	15	10	9	9	10	24.8	32.33	58.33	50.6	22.05	28.25	25.63	24.7	19	19	28.37	54.26	24.75	24.75	0	0
Lesung	10	10	11	12	43	54.2	60.27	60.5	34.84	22.84	30.23	31.36	20	23	48.6	60.39	29.24	30.12	9	10	10	9	35	49.9	17.6	48.22	28.98	24.81	22.8	24.53	19	19	42.84	32.11	27.19	27.82	0	0
Leute	12	8	12	11	62.33	45.38	61.08	83.45	28.04	26.89	32.73	17.18	20	23	55.55	71.78	28.18	28.29	10	8	8	11	19.3	6.63	6.38	26.64	20.07	21.69	11.25	30.54	18	19	13.67	18.11	21.19	25.94	0	0
Lexikon	10	10	11	12	72.9	77.2	90.18	92.25	23.04	15.43	14.46	7.77	20	23	75.05	91.26	19.21	11.24	7	11	9	10	33.71	38.64	52.78	51.5	26.34	35.17	38.63	34.53	18	19	36.72	52.11	31.28	35.49	0	0
Liane	10	10	13	10	77.6	78	62.54	80	17.69	17.77	30.1	22.7	20	23	77.8	70.13	17.26	27.99	8	10	7	12	20.75	20.6	20.57	5.17	31.95	24.39	18.32	19.18	18	19	20.67	10.84	27.11	19.88	0	0
Libelle	10	10	13	10	91.1	89.5	90.92	80.3	8.03	10.93	16.86	15.23	20	23	90.3	86.3	9.37	16.7	10	9	11	9	26.1	38.56	37.36	30.11	23.67	35.09	43.42	30.87	19	20	32	34.1	29.47	37.52	0	0
Licht	9	10	12	11	63.78	78.9	80.92	81	34.61	23.32	19.8	19.2	19	23	71.74	80.96	29.4	19.07	10	9	9	10	59.7	36.22	77.56	64.4	27.23	28.08	20.14	32.14	19	19	48.58	70.63	29.43	27.24	0	0
Lid	10	11	12	10	72.1	86.45	81.08	85.6	26.31	19.59	24.3	22.69	21	22	79.62	83.14	23.61	23.14	11	8	8	11	23.55	9.63	15.88	31.27	26.31	15.28	22.79	33.71	19	19	17.68	24.79	22.92	29.91	0	0
Liebe	10	10	13	10	61.7	29.2	50.23	63.2	32.72	23.16	38.49	33.25	20	23	45.45	55.87	32.24	36.11	13	13	12	13	75.77	72.23	89.83	90.15	35.27	51.39	7.2	13.12	26	25	74	90	43.22	10.48	0	0
Liebschaft	10	8	12	10	40.8	20.25	55.5	55.1	36.78	24.92	29.31	32.75	18	22	31.67	55.32	32.9	30.16	10	8	9	10	60.3	26.5	34	30	29.71	54.17	37.33	39.84	18	19	45.28	31.89	44.43	37.64	0	0
Lied	11	10	10	12	53.82	39.3	55.6	68.5	36.49	30.94	39.81	31.54	21	22	46.9	62.64	33.94	35.27	7	11	10	10	46.43	64.82	54.3	57.1	39.73	31.45	23.76	24.21	18	20	57.67	55.7	34.99	23.39	0	0
Liege	10	10	13	10	81.9	78.1	94.62	88.8	15.23	18	7.43	14.46	20	23	80	92.09	16.34	11.15	9	9	8	11	39.44	11.67	29.75	40.36	25.58	30.98	27.79	23.98	18	19	25.56	35.89	31.05	25.47	0	0
Liegestuhl	10	11	12	11	84.6	92.45	93.5	94.82	11.24	12.61	9.19	4.53	21	23	88.71	94.13	12.35	7.21	10	9	9	10	43.4	48.11	47.11	39.7	25.06	39.71	30.33	29.03	19	19	45.63	43.21	31.95	29.06	0	0
Likör	11	9	12	11	66	65.11	76.5	91.82	26.53	14.52	23.95	10.35	20	23	65.6	83.83	21.43	19.92	10	9	10	9	21.9	16.89	18.3	32.11	47.48	23.97	36.68	42.49	19	19	19.53	24.84	37.27	39.06	0	0
Lilie	10	10	13	10	78.6	93.1	93.92	90.9	28.59	7.23	7.73	14.65	20	23	85.85	92.61	21.62	11.08	10	9	9	10	39.6	50.56	50.78	41.2	25.02	33.94	37.31	22.52	19	19	44.79	45.74	29.27	29.94	0	0
Linde	9	11	13	10	78	80.73	95.31	90.8	18.26	18.46	7.17	11.55	20	23	79.5	93.35	17.94	9.37	11	7	9	10	40.18	30.29	54.78	47.1	30.53	35.57	24.8	34.65	18	19	36.33	50.74	31.93	29.82	0	0
Lineal	10	10	12	11	80.8	93.2	91.92	91.27	21.16	5.55	17.05	10.52	20	23	87	91.61	16.35	13.99	9	9	9	10	-3.33	14.33	17.78	18.2	15.5	15.91	22.97	23.44	18	19	5.5	18	17.74	22.56	0	0
Linie	9	10	13	10	88.78	90.4	83.85	83	9.65	7.4	25.09	22.81	19	23	89.63	83.48	8.33	23.59	9	10	9	10	9	9.7	12.33	12.1	25.31	14.94	15.87	17.41	19	19	9.37	12.21	19.91	16.23	0	0
Linse	9	11	13	10	77.33	83.09	89.85	81.7	16.32	16.29	16.93	20.63	20	23	80.5	86.3	16.14	18.64	8	10	9	10	5.5	9.8	24.89	19.6	12.98	18.77	26.67	25.62	18	19	7.89	22.11	16.15	25.53	0	0
Lippe	8	12	12	11	86.25	91.83	95.75	89.09	16.82	11.13	6	19.52	20	23	89.6	92.57	13.56	14.24	9	10	10	9	35.67	33	24	27.56	32.6	34.62	27.63	34.85	19	19	34.26	25.68	32.77	30.41	0	0
Liste	10	9	12	11	65.1	60.33	86.08	79.36	25.61	25.08	16.79	28.25	19	23	62.84	82.87	24.77	22.7	10	8	10	9	-3.5	3.38	.6	.56	19.56	17.43	12.53	25.32	18	19	-.44	.58	18.44	19.07	0	0
Litanei	8	7	12	11	27.38	15.57	26.25	34.64	30.58	11.54	32.01	31.58	15	23	21.87	30.26	23.7	31.37	8	8	8	11	-21.13	-24.25	-3.5	-33.91	33.45	23.09	33.07	22.55	16	19	-22.69	-21.11	27.81	30.75	.22	0
Liturgie	11	8	12	11	22.09	32.25	47.92	49.64	24.89	24.67	38.73	35.16	19	23	26.37	48.74	24.64	36.23	6	9	9	10	11.33	9.22	29.78	-1.8	34.87	23.68	35.1	33.12	15	19	10.07	13.16	27.49	36.85	.1	0
Lob	10	11	13	10	30	26.09	44.31	52	24.68	21.53	32.37	31.87	21	23	27.95	47.65	22.58	31.66	9	9	9	10	43.22	56.22	65.22	61	30.05	30.38	26.27	30.83	18	19	49.72	63	30.07	28.04	0	0
Loch	11	9	12	10	80.27	87.22	92.58	80.4	14.37	13.02	8.99	22.08	20	22	83.4	87.05	13.88	17.03	10	9	9	10	-17.2	-14.56	-34.78	-13.8	17.42	11.48	39.21	24.36	19	19	-15.95	-23.74	14.56	33.1	0	0
Locke	11	9	11	12	78.64	89.44	86.82	88.58	17.6	11.34	22.1	11.61	20	23	83.5	87.74	15.74	17.04	9	9	8	11	27.44	35.11	21.63	41.55	29.71	34.43	24.18	25.84	18	19	31.28	33.16	31.44	26.47	0	0
Löffel	9	11	13	10	91.56	96.36	97.92	88.5	12.07	5.63	2.33	23.25	20	23	94.2	93.83	9.17	15.71	9	9	9	10	18.11	12.78	30.22	25	19.08	22.21	28.64	22.51	18	19	15.44	27.47	20.27	25	0	0
Logik	10	11	12	11	21.9	11.82	28.17	31.18	28.46	12.16	35.51	25.72	21	23	16.62	29.61	21.57	30.55	11	8	10	9	34.64	22.63	46	56.67	33.02	29.64	29.84	39.66	19	19	29.58	51.05	31.37	34.27	0	0
Lok	10	11	12	10	88.8	86.82	94.5	94	14.34	14.51	8.1	5.06	21	22	87.76	94.27	14.1	6.73	11	8	10	9	25.82	18.25	30.3	14.33	35.33	19.3	39.67	15.53	19	19	22.63	22.74	29.2	31	.03	.04
Lokal	10	11	10	12	72.9	75.82	75.3	82.33	29.74	14.98	22.34	20.72	21	22	74.43	79.14	22.64	21.25	9	9	9	10	22.89	14.78	23.67	11.8	26.68	30.14	25.21	30.28	18	19	18.83	17.42	27.92	27.89	0	0
Lorbeer	10	11	12	11	76.4	83.09	85.67	84.55	20.12	13.6	15.44	20.31	21	23	79.9	85.13	16.92	17.52	9	9	10	10	15.78	28	31.7	33.5	13.58	38.94	32.22	26.63	18	20	21.89	32.6	28.98	28.78	0	0
Los	12	9	11	12	61.08	70.33	69.73	69.17	34.42	22.71	18.29	34.17	21	23	65.05	69.43	29.66	27.13	9	10	9	10	10.33	31.2	13	21.9	27.42	41.26	26.16	19.03	19	19	21.32	17.68	36.05	22.49	0	0
Lösung	11	9	12	11	37.45	26.56	31.83	40.91	28.11	17.94	29.88	36.32	20	23	32.55	36.17	24.13	32.67	10	8	9	10	31.2	52.75	47.44	28.7	29.74	25.95	35	34.18	18	19	40.78	37.58	29.44	34.94	0	0
Löten	10	9	12	11	67.2	54.56	67.08	77.82	31.47	29.78	33.51	31.7	19	23	61.21	72.22	30.52	32.38	11	8	8	11	8.55	-5.13	5	6.18	17.79	9.54	22.2	14.99	19	19	2.79	5.68	16.1	17.8	0	0
Lotterie	11	9	11	11	45.09	52.22	66.64	51.73	19.3	31.88	34.37	30.84	20	22	48.3	59.18	25.24	32.76	9	9	9	10	2.22	27.78	10	11.7	40.8	35.61	30.11	42.72	18	19	15	10.89	39.41	36.28	0	0
Löwe	10	11	14	9	95.4	97.91	98.07	95.67	6.69	3.11	2.23	3.35	21	23	96.71	97.13	5.16	2.91	11	8	9	10	41.64	34.38	-3.78	-3.8	25.29	32.58	53.94	55.05	19	19	38.58	-3.79	27.96	52.99	0	0
Löwenzahn	11	9	11	12	90.91	90.67	95.82	88.83	6.11	10.42	6.95	18.15	20	23	90.8	92.17	8.08	14.12	8	10	10	9	34.13	42.8	50.9	36	12.53	24.95	26.78	30.52	18	19	38.94	43.84	20.34	28.83	0	0
Luchs	11	9	13	10	85	87.44	91.38	86.1	13.65	10.33	12.35	16.24	20	23	86.1	89.09	12.03	14.08	10	8	9	10	36.3	-2.38	39.78	24.9	23.27	29.95	32.07	24.22	18	19	19.11	31.95	32.36	28.44	0	0
Lücke	10	11	11	12	69.8	66.91	65.73	77.33	17.97	20.37	29.98	25.66	21	23	68.29	71.78	18.84	27.8	8	10	10	9	-7.25	-11.2	-14.1	-10.67	35.45	14.12	20.39	25.14	18	19	-9.44	-12.47	25.04	22.18	0	0
Luft	10	10	12	10	52.5	48.1	46.42	42.4	24.39	31.46	37.64	30.94	20	22	50.3	44.59	27.49	34.01	10	9	8	11	44	53	54.13	47.18	24.44	33.72	29.97	25.29	19	19	48.26	50.11	28.73	26.78	0	0
Luftpumpe	10	10	12	11	85.3	86.5	96	84.55	13.61	12.47	7.14	15.71	20	23	85.9	90.52	12.72	13.11	10	9	9	10	4.3	5.56	21.89	32.8	25.18	9.55	21.8	26.22	19	19	4.89	27.63	18.92	24.21	0	0
Luftröhre	11	8	11	11	64.64	75	57.27	79.91	31.3	20.79	35.62	22.93	19	22	69	68.59	27.2	31.44	11	8	12	8	-17.82	-10.88	17.5	15.5	38.2	21.81	46.08	34.36	19	20	-14.89	16.7	31.75	40.8	0	0
Lüge	10	9	13	10	23.6	6.44	27.92	35.1	25.33	7.88	31.49	29.99	19	23	15.47	31.04	20.64	30.37	8	11	11	8	-66.13	-54.09	-69.55	-63.25	28.33	29.87	31.19	27.59	19	19	-59.16	-66.89	29.07	29.1	0	0
Luke	11	9	12	11	64.27	69.22	84.83	81.82	26.92	21.68	13.58	20.93	20	23	66.5	83.39	24.2	17.14	11	7	10	10	6	3.71	12	6.5	15.65	25.93	31.56	21	18	20	5.11	9.25	19.56	26.24	0	0
Lümmel	10	9	13	10	40.9	35.78	59.31	72.8	22.83	21.29	35.66	32.69	19	23	38.47	65.17	21.65	34.31	9	9	10	9	-14.33	-1.44	-40.8	-13.89	23.41	29.45	36.53	41.77	18	19	-7.89	-28.05	26.65	40.42	0	0
Lumpen	9	10	11	12	70.56	79.7	86.18	77.58	21.9	13.74	16.1	28.84	19	23	75.37	81.7	18.15	23.51	8	10	10	10	-21.25	-36.5	-35.4	-33.9	11.68	30.55	34.08	28.49	18	20	-29.72	-34.65	24.72	30.58	0	0
Lunge	11	9	12	11	72.36	66.11	76.83	84.55	24.89	28.13	23	23.72	20	23	69.55	80.52	25.87	23.15	9	10	9	10	1.67	-14.2	26.67	22.1	42.4	29.75	31.69	25.63	19	19	-6.68	24.26	36.17	27.93	0	0
Lupe	10	10	11	12	79.3	90.1	93.73	87.83	25.32	13.54	9.91	18.07	20	23	84.7	90.65	20.52	14.73	11	8	8	11	10.73	15.75	21.13	32.64	20.83	36.81	23.37	28.41	19	19	12.84	27.79	27.83	26.36	0	0
Lurch	9	11	10	12	73.78	72.64	85.7	84.67	22.31	18.95	18.12	19.8	20	22	73.15	85.14	19.97	18.61	8	10	10	9	13.88	10.7	22.5	8.89	17.79	24.18	47.16	28.3	18	19	12.11	16.05	21.03	38.94	0	.04
Lutscher	8	11	11	11	81.5	88.45	82.91	85.55	19.1	9.57	21.43	15.69	19	22	85.53	84.23	14.33	18.37	9	9	10	10	24.11	38.44	25.3	16.5	16.47	36.6	33.24	37.3	18	20	31.28	20.9	28.5	34.68	0	0
Luxus	10	10	12	11	43.8	39.5	53.67	48.73	30.32	23.96	29.21	37.26	20	23	41.65	51.3	26.69	32.62	9	10	10	9	26.67	16.1	44.2	34.78	40.46	43.58	40.96	45.38	19	19	21.11	39.74	41.31	42.16	0	0
Macht	12	9	11	12	38.67	26.56	34.36	43.83	31.96	29.53	28.26	35.09	21	23	33.48	39.3	30.8	31.66	13	13	12	13	-29.54	-42.69	-15.08	-35.15	43.27	53.89	49.28	45.3	26	25	-36.12	-25.52	48.35	47.37	0	0
Machwerk	11	9	12	11	24.73	26.11	26.42	44.73	26.36	20.78	26.6	35.11	20	23	25.35	35.17	23.41	31.65	10	9	10	9	-8.5	13.33	-16.3	-22.33	31.84	31.56	17.04	38.61	19	19	1.84	-19.16	32.79	28.59	0	0
Mädchen	11	10	12	12	78.91	64.5	94.75	89.08	20.38	23.56	6.22	13.79	21	24	72.05	91.92	22.62	10.86	13	13	12	13	65.23	31	79.08	63.31	18.96	29.01	21.38	28.99	26	25	48.12	70.88	29.68	26.35	0	0
Made	11	9	14	9	82.27	80.56	87.64	86.11	12.53	18.7	15.42	14.79	20	23	81.5	87.04	15.19	14.85	10	9	8	11	-43	-44.44	-42.63	-55	28.86	34.65	37.83	29.38	19	19	-43.68	-49.79	30.83	32.79	0	0
Madonna	9	11	12	12	78.22	87.36	81.25	75.58	21.34	11.94	19.58	25.62	20	24	83.25	78.42	16.98	22.49	10	8	8	11	-3	33.25	19.88	20.55	38.76	35.41	25.35	41.89	18	19	13.11	20.26	40.68	35	0	0
Magazin	12	8	13	10	67.17	68.63	67.23	77.5	25.32	18.59	34.25	26.26	20	23	67.75	71.7	22.34	30.81	9	10	8	11	3.67	29.9	5.13	23	26.75	26.01	11.62	25.92	19	19	17.47	15.47	28.94	22.54	0	0
Magd	12	8	11	12	57.92	76.38	71.73	75.08	26.71	14.92	32.89	23.92	20	23	65.3	73.48	24.1	27.94	11	8	10	10	18.45	-24.63	11.1	-2.1	34.48	33.8	20.32	29.18	19	20	.32	4.5	39.78	25.39	0	0
Magen	10	10	12	11	70.6	75.7	81.25	77.82	17.49	16.34	18.62	19.36	20	23	73.15	79.61	16.68	18.62	10	9	10	9	-2.8	-6.11	11.6	8.56	24.48	10.73	36.7	23.84	19	19	-4.37	10.16	18.81	30.47	0	0
Magnet	10	11	13	9	80.3	76.91	83.15	71.89	18.03	18.69	24.39	27.04	21	22	78.52	78.55	18	25.51	10	9	9	10	6.1	19.33	13.67	22	13.66	20.69	12.67	29.34	19	19	12.37	18.05	18.16	22.81	0	0
Mahl	10	10	13	10	58.5	59.8	71.46	66.1	31.65	24	25.28	35.4	20	23	59.15	69.13	27.35	29.47	8	10	9	9	28.13	29.3	51	24.89	25.09	28.82	31.74	31.29	18	18	28.78	37.94	26.44	33.4	0	0
Mähne	12	8	12	10	83.75	80.63	88.5	85.2	17.67	15.39	10.79	16.42	20	22	82.5	87	16.45	13.39	9	10	8	11	14.78	25.4	16	2.18	24.38	20.33	33.78	38	19	19	20.37	8	22.37	35.99	0	0
Mai	10	10	11	12	44.6	46.8	70.73	75.25	34.71	22.93	30.85	23.94	20	23	45.7	73.09	28.65	26.92	10	9	10	9	37.7	41.44	60.5	65.67	24.94	37.58	22.15	20.1	19	19	39.47	62.95	30.7	20.78	0	0
Maikäfer	10	10	13	10	86	87	95.77	92.6	11.98	12.9	6.31	9.17	20	23	86.5	94.39	12.13	7.66	10	9	9	10	43.6	47.11	52	39.1	28.28	29.53	27.26	32.09	19	19	45.26	45.21	28.12	29.82	0	0
Mais	10	10	11	12	82.5	94.9	92	82.92	14.08	4.58	11.3	17.82	20	23	88.7	87.26	12.01	15.44	9	10	9	10	27	27.3	40.67	26.2	19.14	31.53	29.53	20.42	19	19	27.16	33.05	25.69	25.51	0	0
Majestät	9	11	12	11	62.11	54.64	61.92	57.82	33.62	31.29	22.69	33.88	20	23	58	59.96	31.71	27.99	10	9	7	12	-9.5	13.78	-7	-7.92	18.28	40.96	19.44	38.58	19	19	1.53	-7.58	32.48	32.18	0	0
Makel	10	11	15	8	30.7	31.27	38.73	52	22.46	28.33	33.95	28.32	21	23	31	43.35	25.07	32.1	10	8	7	12	-25.7	-27.63	-28.86	-32.75	39.76	19.12	30.72	31.39	18	19	-26.56	-31.32	31.44	30.34	0	0
Makrele	9	12	12	11	70.78	70.67	86.42	89.36	28.4	19.97	16.65	8.02	21	23	70.71	87.83	23.28	13.04	8	10	7	12	13.5	5.6	37.14	32	31.05	20.31	23.75	39.62	18	19	9.11	33.89	25.13	33.97	0	0
Mal	11	10	13	10	32.82	41.5	55.23	59	29.07	34.52	37.28	33.77	21	23	36.95	56.87	31.28	35.05	9	9	9	10	1.22	4.44	-3.33	3.8	12.05	13.57	14.24	31.6	18	19	2.83	.42	12.56	24.55	0	0
Maler	11	8	13	10	72.09	65.88	85.69	83.6	23.44	14.05	14.34	18.06	19	23	69.47	84.78	19.79	15.71	10	9	9	10	26.4	35.67	26.33	32.5	33.06	42.7	16.11	24.03	19	19	30.79	29.58	37.14	20.35	0	0
Malkasten	10	11	11	12	78	85.55	94.27	90.08	19.47	17.92	8.39	13.02	21	23	81.95	92.09	18.6	11.02	9	10	9	10	20	39.1	20.56	30.7	9.79	39.4	18.72	32.25	19	19	30.05	25.89	30.24	26.51	0	0
Mammut	10	10	13	10	92.6	89.2	68.54	85.9	10.68	12.67	31.71	11.86	20	23	90.9	76.09	11.54	26.14	10	9	10	9	27.5	24.22	16.9	12	21.24	25.73	32.31	20.46	19	19	25.95	14.58	22.86	26.73	0	0
Management	10	9	12	11	39.4	12.67	32.17	54.64	22.36	10.14	28.09	30.91	19	23	26.74	42.91	21.99	30.99	9	9	9	10	-18	-19.11	4.56	18	40.48	35.19	46.39	30.32	18	19	-18.56	11.63	36.8	38.26	0	0
Mandel	10	9	9	14	77.1	85.56	93.44	87.71	24.7	11.96	9.63	11.86	19	23	81.11	89.96	19.69	11.18	9	10	10	9	30.89	24.8	39.2	40.22	15.18	25.42	25.33	22	19	19	27.68	39.68	20.86	23.16	0	0
Manege	9	10	11	12	76.22	75.8	83.64	87.58	20.89	23.52	22.43	13.5	19	23	76	85.7	21.69	18	8	10	10	10	-3.13	20.5	20.4	29.9	19.65	28.92	30.11	29.13	18	20	10	25.15	27.34	29.24	0	0
Mangel	10	11	13	10	30.7	29.82	48.62	36.3	21.24	23.25	28.71	36.05	21	23	30.24	43.26	21.76	31.94	10	9	9	10	-50.8	-54.22	-56.33	-46.8	19.85	30.01	23.16	33.15	19	19	-52.42	-51.32	24.5	28.49	0	0
Mango	11	10	10	13	79.64	91.8	85.4	90.62	14.13	15.34	24.31	9.9	21	23	85.43	88.35	15.64	17.39	11	7	9	10	32.36	50.29	31.56	45.3	34.13	46.66	25.6	28.49	18	19	39.33	38.79	39.17	27.33	0	0
Mann	10	10	11	12	82.8	83.3	92.55	90.67	15.21	13.51	10.39	11.6	20	23	83.05	91.57	14	10.83	9	9	8	11	22.33	26.33	13.5	45.73	31.74	31.95	15.87	28.29	18	19	24.33	32.16	30.96	28.46	0	0
Mannschaft	12	8	10	13	66.08	67.88	80.9	80.23	29.12	18.1	21.76	22.75	20	23	66.8	80.52	24.74	21.82	9	9	9	10	36.78	13.33	25.44	35.7	33.17	28.87	24.19	22.15	18	19	25.06	30.84	32.49	23.09	0	0
Mantel	11	9	13	10	73.64	85.89	96.92	90.7	25.85	13.82	2.96	10.25	20	23	79.15	94.22	21.71	7.6	10	8	9	10	34.9	17.75	40	49.2	27.02	26.84	19.84	32.88	18	19	27.28	44.84	27.57	27.16	0	0
Mappe	9	9	13	10	66.33	75.67	87.69	89.7	28.51	21.3	19.97	9.27	18	23	71	88.57	24.88	15.93	10	8	10	9	2.6	12.63	18	12.56	14.23	15.88	21.46	16.23	18	19	7.06	15.42	15.41	18.85	0	0
Märchen	11	9	11	12	54.18	42.22	61.91	65.08	22.59	22.1	29.27	36.01	20	23	48.8	63.57	22.62	32.26	8	11	10	9	51.63	60.36	38	43	34.19	33.38	31.45	44.33	19	19	56.68	40.37	33.07	37.07	0	0
Marder	12	8	12	10	79.75	82.5	92.33	91.5	18.64	16.88	15.27	10.41	20	22	80.85	91.95	17.55	12.99	9	9	8	11	12.44	7.78	4	-15.64	27.91	17.03	57.74	44.31	18	19	10.11	-7.37	22.56	49.86	0	0
Markierung	10	11	12	11	48.5	49.91	65.58	76.18	34.34	28.36	26.69	29.05	21	23	49.24	70.65	30.55	27.73	9	9	9	10	6.22	4	26.67	5.1	19.72	15.72	26.67	14.82	18	19	5.11	15.32	17.34	23.42	0	0
Markstück	11	11	12	11	78.91	78.55	92.92	76	22.84	20.66	13.77	29.71	22	23	78.73	84.83	21.26	23.89	9	9	11	8	14.56	8.78	41.73	31.88	48.64	11.29	41.79	26.88	18	19	11.67	37.58	34.38	35.72	0	0
Markt	9	11	13	10	75.44	75.45	79.08	86.6	22.63	18.98	22.47	20.24	20	23	75.45	82.35	20.13	21.39	8	10	8	11	4.75	31.8	38.63	40	36.76	22.64	30.25	28.31	18	19	19.78	39.42	31.92	28.31	0	0
Marmor	11	10	12	11	80.73	80.4	96.58	86	19.91	20.61	5.65	15.26	21	23	80.57	91.52	19.73	12.29	9	10	7	12	26.67	22.7	48	24.42	26.96	30.1	25.83	18.89	19	19	24.58	33.11	27.93	24.02	0	0
Mars	8	11	11	11	94	68.09	78.27	68.73	4.54	22.01	26.17	31.6	19	22	79	73.5	21.21	28.73	11	8	10	9	32.36	21.5	27.9	11	32.22	22.08	49.51	19.38	19	19	27.79	19.89	28.22	38.31	0	0
Märtyrer	11	9	11	12	56.45	51.89	49.55	54.92	28.13	20.03	30.61	32.46	20	23	54.4	52.35	24.31	30.99	9	9	7	12	-53.11	-44.33	-29.57	-24	38.07	28.91	16.02	44.85	18	19	-48.72	-26.05	33.1	36.36	0	0
Marzipan	10	10	12	11	64.6	79.1	84.67	85.91	35.91	18.66	25.58	15.12	20	23	71.85	85.26	28.83	20.77	7	12	10	9	-1.86	28.17	52.6	58.44	38.26	41.14	45.5	34	19	19	17.11	55.37	41.76	39.47	0	0
Masche	10	9	12	10	54	58.44	63.5	78.7	31.28	28.8	28.24	29.65	19	22	56.11	70.41	29.38	29.23	9	9	9	10	-12.44	-8.56	-10.33	19.5	13.27	18.97	31.75	30.63	18	19	-10.5	5.37	16	33.93	0	0
Maschine	11	10	11	12	57.91	63.5	86.36	75.67	26.6	23	18.83	22.78	21	23	60.57	80.78	24.49	21.23	10	8	8	11	-2.1	-14.5	17.63	19.82	32.73	17.11	18.07	35.85	18	19	-7.61	18.89	26.98	29.02	0	0
Maske	12	9	11	12	80.5	88	79.91	87.08	20.09	12.13	23.24	17.97	21	23	83.71	83.65	17.19	20.5	9	9	8	11	-15	-13.78	-15.63	-2.73	18.88	32.28	35.31	27.89	18	19	-14.39	-8.16	25.66	30.98	0	0
Maßnahme	11	10	12	10	15.64	12.9	37.08	39.5	19.52	9.87	34.39	27.02	21	22	14.33	38.18	15.37	30.56	9	9	8	11	-11	-10.44	-14.5	2.82	25.54	29.67	42.07	34.31	18	19	-10.72	-4.47	26.86	37.68	0	0
Mast	10	11	12	11	75.2	87.27	69.92	85.09	34.05	13.61	28.96	13.97	21	23	81.52	77.17	25.54	23.83	11	8	9	10	-.36	5.63	20.11	-2.7	29.93	24.45	25.06	22.65	19	19	2.16	8.11	27.2	25.94	0	0
Matratze	11	10	12	10	78.64	92	90.25	80.8	24.2	9.04	11.49	21.71	21	22	85	85.95	19.4	17.16	9	9	9	10	19.33	20.89	24.89	21.1	31	27.51	25.48	20.84	18	19	20.11	22.89	28.44	22.57	0	0
Matrose	9	10	12	11	69	84.2	92.92	87.64	29.85	13.59	11.67	12.95	19	23	77	90.39	23.43	12.31	7	11	9	10	4.29	18.18	34	19.4	14.52	20.03	29.73	13.73	18	19	12.78	26.32	18.95	23.31	0	0
Matsch	9	12	13	9	61.67	75.25	82.23	75.11	33.11	17.31	19.65	25.12	21	22	69.43	79.32	25.51	21.77	8	11	10	9	-14.13	-12.91	-36.3	-22.33	35.22	21.42	30.55	38.56	19	19	-13.42	-29.68	27.16	34.34	0	0
Mauer	8	12	11	12	76.13	90.75	94.91	88.33	20.28	7.65	6.3	12.56	20	23	84.9	91.48	15.47	10.4	9	9	8	11	-31.33	-25.56	-1.75	-7.36	26.22	35.62	42.78	34.22	18	19	-28.44	-5	30.49	37.02	0	0
Maul	10	9	13	10	77	77.22	90.92	87.9	22.25	18.12	12.75	10.35	19	23	77.11	89.61	19.84	11.61	8	10	10	9	-7.38	-16.8	-1.5	.56	21.61	31.46	18.36	23.63	18	19	-12.61	-.53	27.19	20.44	0	0
Maulwurf	9	11	13	10	91.22	94	87.92	82.6	10.39	6.23	17.78	23.16	20	23	92.75	85.61	8.24	19.98	11	8	9	11	19.09	29.5	14.22	2.82	36.59	36.71	54.6	44.4	19	20	23.47	7.95	36	48.23	0	0
Maurer	9	11	11	12	70.33	65.45	84.09	83.33	33.09	16.99	18.53	19.51	20	23	67.65	83.7	24.88	18.62	9	9	8	11	-1.89	-1.33	17.13	23.64	12.23	11.09	21.33	18.46	18	19	-1.61	20.89	11.33	19.42	0	0
Maus	11	8	11	11	95.18	97.25	96.18	83.82	5.96	3.58	5.74	29.55	19	22	96.05	90	5.08	21.71	10	8	9	10	27.2	4.75	-8.33	-10.8	35.66	17.12	48.1	39.44	18	19	17.22	-9.63	30.42	42.51	0	0
Mauseloch	9	11	14	9	72.11	81.91	76.71	79.67	30.33	15.28	25.17	28.07	20	23	77.5	77.87	23.13	25.75	10	9	8	11	3.7	-.78	-3.5	-5.09	21.78	29.95	27.56	29.36	19	19	1.58	-4.42	25.32	27.84	0	0
Medaille	9	10	11	12	83.33	86.9	83.55	86.08	16.01	15.95	25.27	15.45	19	23	85.21	84.87	15.63	20.28	8	10	8	11	32.13	33	30	28.73	25.39	38.8	39.46	40.49	18	19	32.61	29.26	32.59	38.95	0	0
Medizin	10	9	13	10	54.4	51.11	73.31	78.2	25.49	25.44	27.62	19.31	19	23	52.84	75.43	24.81	23.98	8	10	9	10	20.38	38	31.67	46.2	24.02	27.79	57.08	30.94	18	19	30.17	39.32	26.98	44.53	0	0
Meer	10	10	12	11	88.3	96	91	88.36	12.98	3.09	14.47	17.07	20	23	92.15	89.74	10	15.45	9	10	10	9	80.11	79.4	51.1	59.67	19.83	24.53	32.36	27.31	19	19	79.74	55.16	21.81	29.57	0	0
Mehl	10	9	13	10	77.5	89.78	88.15	89.8	17.66	14.83	21.53	16.44	19	23	83.32	88.87	17.13	19.08	9	9	8	11	8.56	11.78	26.5	26.91	9.1	16.56	19.35	24.52	18	19	10.17	26.74	13.07	21.9	0	0
Meineid	10	11	13	10	22.3	17	41.15	40.8	22.27	17.26	40.28	30.36	21	23	19.52	41	19.48	35.53	10	9	9	10	-48.8	-33.67	-69.44	-60.1	28.14	38.66	29.85	27.7	19	19	-41.63	-64.53	33.47	28.33	0	0
Meinung	12	9	13	10	17.08	10.44	27.54	37.5	24.95	15.4	31.54	34.54	21	23	14.24	31.87	21.18	32.5	11	8	9	10	19.36	15.5	4.11	31.9	32.35	22.7	9.6	28.7	19	19	17.74	18.74	28.03	25.61	0	0
Meise	9	10	12	11	84.56	85	95.25	80.91	17.88	16.4	6.25	19.34	19	23	84.79	88.39	16.63	15.59	8	10	9	10	35.25	14.8	64.44	44.7	29.32	23.38	23.99	29.9	18	19	23.89	54.05	27.43	28.38	0	0
Meißel	11	9	12	11	67.64	72	96.25	83.91	25.02	19.6	4.65	17.45	20	23	69.6	90.35	22.27	13.75	8	10	11	8	-11.13	-10	9	-1.13	23.72	17.54	22.58	11.47	18	19	-10.5	4.74	19.87	18.99	0	0
Meister	9	11	12	10	46.44	47.64	78.67	61.1	33.2	21.15	20.67	26.67	20	22	47.1	70.68	26.46	24.67	10	9	11	8	10.5	29.22	36.27	36	37.4	29.68	27.25	28.85	19	19	19.37	36.16	34.4	27.13	0	0
Melodie	9	12	10	13	54.22	43.25	45.5	50.46	42.46	32.83	40.13	35.45	21	23	47.95	48.3	36.67	36.75	8	10	8	11	52.88	64.4	46.88	63.09	28.03	28.57	26.33	24.17	18	19	59.28	56.26	28.11	25.72	0	0
Melone	10	10	11	12	85.4	97	95.09	92.67	16.21	3.65	9.65	10.45	20	23	91.2	93.83	12.89	9.92	9	9	8	11	24	44.56	38	38.09	30.15	33.99	22.3	36.18	18	19	34.28	38.05	32.91	30.35	0	0
Mensch	10	10	12	10	71	61.9	87.17	84.5	23	27.55	24.86	25.27	20	22	66.45	85.95	25.13	24.48	9	10	9	10	33.78	18.8	45.78	62.6	22.17	25.87	31.29	19.91	19	19	25.89	54.63	24.74	26.6	0	0
Menü	11	10	12	10	53.45	61.4	79.67	69.7	30.15	23.2	19.97	20.3	21	22	57.24	75.14	26.71	20.28	9	10	10	9	33.33	42.9	47.7	46.44	29.64	27.76	27.48	29.76	19	19	38.37	47.11	28.28	27.77	0	0
Merkmal	9	11	11	12	30.89	18.73	31.82	47.58	17.69	21.1	25.28	36.73	20	23	24.2	40.04	20.11	32.09	8	10	11	8	-3.63	6.8	19.73	13.75	17.09	11.38	23.48	28.51	18	19	2.17	17.21	14.74	25.13	0	0
Messer	10	10	12	11	94.5	96.7	96.92	89.45	5.68	3.56	4.8	19.82	20	23	95.6	93.35	4.75	14.3	9	10	9	10	-16.44	-30.9	-11	-9.7	41.47	36.66	34.8	25.99	19	19	-24.05	-10.32	38.61	29.6	0	0
Metall	11	9	12	11	58.45	77.22	70.58	76.82	32.07	16.98	25.16	25.08	20	23	66.9	73.57	27.46	24.75	9	9	9	10	11.44	-8	8.11	8.9	28.59	16.87	17.1	10.22	18	19	1.72	8.53	24.87	13.5	0	0
Meter	10	9	12	10	55.2	53.56	71.75	72.9	29.31	22.75	30.3	28.77	19	22	54.42	72.27	25.7	28.91	10	9	9	11	12	8.67	12.33	14.09	18.67	24.18	28.57	17.69	19	20	10.42	13.3	20.91	22.57	0	0
Methode	10	10	13	11	17.5	24.2	25.85	40.64	25.31	20.29	22.06	32.23	20	24	20.85	32.63	22.59	27.6	8	10	9	10	5.25	13	10.33	10.7	17.04	11.99	14.87	17.26	18	19	9.56	10.53	14.54	15.73	0	0
Metzger	11	9	13	10	78.73	77	89.38	82.6	21.92	13.35	15.38	21.25	20	23	77.95	86.43	18.13	18.04	12	7	9	9	-6.92	-33.57	12.33	5.33	22.22	36.19	21.77	36.35	19	18	-16.74	8.83	30.21	29.29	0	0
Mikado	11	9	12	11	84.36	84.44	75.67	84	13.31	10.54	27.15	18.79	20	23	84.4	79.65	11.83	23.39	9	10	8	11	14.67	27.5	13.88	22.36	14.47	27.49	13.8	25.86	19	19	21.42	18.79	22.68	21.54	0	0
Mikrofon	12	10	15	11	89.67	93.5	89.8	89.45	9.26	8.95	13.7	17.3	22	26	91.41	89.65	9.11	15	10	8	9	10	13.5	23.13	11.78	3	32.38	36.12	18.33	15.48	18	19	17.78	7.16	33.41	17.01	0	0
Mikroskop	11	7	12	11	94.45	95.71	93.17	89.82	4.72	3.55	9.93	20.47	18	23	94.94	91.57	4.24	15.58	11	8	10	9	15.64	11.38	40.4	23.89	19.5	18.34	22.2	20.97	19	19	13.84	32.58	18.62	22.66	0	0
Milch	12	10	12	10	85.5	93.6	93.75	88.5	11.86	6.67	11.19	8.85	22	22	89.18	91.36	10.48	10.31	8	10	9	10	42	35.4	54.44	64.8	29.97	35.56	29.16	24.19	18	19	38.33	59.89	32.41	26.43	0	0
Million	10	10	11	12	43.2	53.2	50.82	68.42	33.83	20.79	37.64	31.86	20	23	48.2	60	27.8	35.1	9	9	9	11	36.44	37.22	42.11	54.36	39.85	27.73	33.1	32.72	18	20	36.83	48.85	33.31	32.62	0	0
Minirock	9	10	13	10	86.89	91.7	89.15	88.9	10.8	10.51	16.13	19	19	23	89.42	89.04	10.64	17.02	11	7	10	9	51.45	3.86	44	22.44	41.94	42.67	35.77	22.07	18	19	32.94	33.79	47.41	31.28	0	0
Minister	11	9	13	10	47.27	45.78	53	74.5	29.7	26.11	36.46	22.41	20	23	46.6	62.35	27.42	32.39	10	8	10	9	-13.5	-7.88	-8.1	10.22	37.51	18.59	14.62	17.16	18	19	-11	.58	29.92	18.06	0	0
Minute	12	10	10	13	33.67	23.1	58	52.85	35.46	24.3	40.59	38.12	22	23	28.86	55.09	30.67	38.38	9	9	9	10	-3.44	5.44	11.22	17.9	22.89	13.11	26.99	21.83	18	19	1	14.74	18.66	23.96	0	0
Misserfolg	9	11	12	11	23.89	11.36	32	37.91	24.11	7.07	28.05	27.74	20	23	17	34.83	17.66	27.43	10	8	8	11	-62	-53.63	-62.63	-61.36	18.28	31.33	25.57	24.9	18	19	-58.28	-61.89	24.48	24.48	0	0
Mist	9	12	12	11	74.22	81.75	86.92	73.55	25.98	13.98	15.25	28.47	21	23	78.52	80.52	19.8	23.05	11	8	9	10	-28.36	-30.5	-21.89	-45.2	22.11	20.22	35.63	35.98	19	19	-29.26	-34.16	20.78	36.8	0	0
Mistel	9	11	11	11	69.33	79.82	88.73	88	30.29	18.47	14.44	11.48	20	22	75.1	88.36	24.38	12.74	10	8	10	9	19.4	18.75	28.3	33.89	31.54	15.9	19.41	33.95	18	19	19.11	30.95	25.12	26.63	0	0
Mitglied	11	10	12	11	31.64	22.4	37.92	56.82	29.16	15.56	33.36	33.83	21	23	27.24	46.96	23.59	34.2	10	8	9	10	13.2	11.63	10.11	19.8	25.91	27.13	11.73	19.62	18	19	12.5	15.21	25.68	16.69	0	0
Mittag	12	9	13	10	42.08	41.67	68.38	70.9	26.06	27.82	27.49	27.85	21	23	41.9	69.48	26.14	27.04	9	9	10	9	31.44	39.44	51.1	42	23.98	30.13	36.94	36.74	18	19	35.44	46.79	26.74	36.11	0	0
Mitte	10	10	11	12	41.1	40.3	62.45	63.58	30.52	19.15	27.55	34.63	20	23	40.7	63.04	24.8	30.74	10	8	9	10	18.1	13.75	4	16.5	34.57	33.48	6.96	29.29	18	19	16.17	10.58	33.15	22.17	0	0
Mittel	14	15	15	17	34.86	39.13	44.27	41.65	24.11	21.85	24.46	22.12	29	32	37.07	42.88	22.66	22.91	8	10	10	9	10.25	4.7	.2	5.89	30.23	13.06	2.49	7.67	18	19	7.17	2.89	21.79	6.15	0	0
Mixer	12	8	11	12	82.5	86.88	81.27	79.67	18.05	11.86	22.5	26.79	20	23	84.25	80.43	15.66	24.28	9	9	8	11	17.33	24.89	27.38	33.55	32.19	30.76	34.61	26.35	18	19	21.11	30.95	30.79	29.35	0	0
Möbel	9	10	11	11	63.33	80.4	81.91	89.64	31.89	18.6	26.37	19.59	19	22	72.32	85.77	26.49	23.01	10	8	10	9	10	8.38	39.4	34.67	18.53	8.68	34.96	30.86	18	19	9.28	37.16	14.61	32.25	0	0
Möbelstück	10	11	12	11	67.7	65.55	82.08	84.45	22.34	22.91	16.39	16.89	21	23	66.57	83.22	22.09	16.29	8	11	8	11	9.88	2.82	24.25	21.73	20.36	12.58	34.63	24.58	19	19	5.79	22.79	16.18	28.35	0	0
Modell	9	10	11	12	58.78	42.4	63	69.92	30.32	32.87	26.12	26.92	19	23	50.16	66.61	31.93	26.17	8	11	7	12	16	5.27	24.14	16.75	16.75	21.58	30.02	22.04	19	19	9.79	19.47	19.93	24.71	0	0
Mofa	11	8	13	9	84.45	83.88	85.08	89.11	15.27	16.4	25.47	11.2	19	22	84.21	86.73	15.3	20.55	9	10	9	10	-7.56	2.2	7	1.9	30.11	22.23	30.32	14.98	19	19	-2.42	4.32	25.98	22.97	0	0
Mohr	9	9	12	11	59.56	56.33	78.25	76.55	35.86	34.87	32.33	17.81	18	23	57.94	77.43	34.35	25.83	9	8	10	9	-18.44	-10.25	13	23.22	37.82	37.05	29.03	13.67	17	19	-14.59	17.84	36.52	23.07	.04	0
Möhre	11	9	12	10	91.27	95.89	98.5	93.4	9.89	4.62	3.21	9.99	20	22	93.35	96.18	8.13	7.41	9	9	9	10	13.44	18.56	52.89	45.8	18.44	30.97	24.28	27.24	18	19	16	49.16	24.87	25.42	0	0
Mohrrübe	11	8	11	11	85.27	93.75	97.36	92.36	16.49	6.73	5.66	10.33	19	22	88.84	94.86	13.68	8.52	11	7	10	9	19.73	22.29	51.6	47.56	21.04	39.25	21.27	29.08	18	19	20.72	49.68	28.39	24.63	0	0
Mokassin	8	10	11	12	69.63	77.4	79.64	79.25	18.58	17.74	26.76	22.49	18	23	73.94	79.43	18.01	24.05	8	11	10	10	35.75	21.64	11.3	26.8	25.77	32.31	18.17	26.62	19	20	27.58	19.05	29.83	23.56	.07	0
Monat	9	10	12	11	35.22	18.6	42.83	71	30.28	17.38	37.57	24.63	19	23	26.47	56.3	25.12	34.48	11	8	10	9	2.91	20.38	.2	20.22	19	28.96	13.64	26.8	19	19	10.26	9.68	24.6	22.76	0	0
Mönch	10	9	12	11	76.2	81.11	92.75	89.91	27.37	13.92	7.7	8.86	19	23	78.53	91.39	21.61	8.21	8	10	10	9	-.88	14.6	28.7	-4.78	39.79	14.03	27.84	29.49	18	19	7.72	12.84	28.61	32.69	0	0
Mond	11	9	10	12	93.82	90.33	96.2	85.33	7.07	11.85	6.81	18.64	20	22	92.25	90.27	9.41	15.25	10	8	9	10	43.9	55	35.56	40.8	29.29	36.42	20.84	29.85	18	19	48.83	38.32	32.13	25.41	0	0
Monokel	11	11	10	12	79.82	82.55	97.4	84.75	21.54	15.33	4.3	20.16	22	22	81.18	90.5	18.3	16.2	9	9	8	11	-9	8.44	-14.63	6.55	19.86	41.52	25.9	32.68	18	19	-.28	-2.37	32.82	31.13	0	.03
Moor	11	9	11	11	82.82	74.67	78.73	93.36	17.3	27.51	19.33	8.64	20	22	79.15	86.05	22.21	16.42	9	9	9	10	4.44	-19.78	-33.22	-25.6	43.71	28.39	47.28	39.66	18	19	-7.67	-29.21	37.86	42.37	0	0
Moos	10	11	13	10	74.3	86.55	83.77	83.1	29.03	16.24	16.48	16.88	21	23	80.71	83.48	23.46	16.27	9	9	8	11	36.11	25.22	29.5	33.82	27.41	17.63	30.18	23.65	18	19	30.67	32	23.05	25.88	0	0
Moped	9	11	11	12	83.33	85.09	91.73	88.92	13.92	12.79	10.19	11.32	20	23	84.3	90.26	12.98	10.64	8	10	9	10	5.5	4	4.89	-9.4	27.85	9.55	33.01	25.34	18	19	4.67	-2.63	19.19	29.31	0	0
Moral	11	9	13	10	12.09	14.22	36.92	44.6	12.38	19.67	33.35	29.44	20	23	13.05	40.26	15.65	31.25	7	11	9	10	-1.57	10.91	61.56	27.8	41.16	56.47	34.69	42.74	18	19	6.06	43.79	50.13	41.81	0	0
Mord	12	9	13	10	58.25	42.67	70.46	66.2	28.36	27.83	27.23	35.11	21	23	51.57	68.61	28.54	30.22	13	13	12	13	-77.15	-92.46	-84.08	-88.46	28.78	14.16	46.25	24.4	26	25	-84.81	-86.36	23.55	35.82	0	0
Mörder	10	10	11	12	63.8	45.7	61.27	50.25	27.46	25.63	36.79	31.94	20	23	54.75	55.52	27.47	34.01	8	11	9	10	-70.63	-78.82	-100	-96.9	15.02	29.97	0	6.12	19	19	-75.37	-98.37	24.57	4.61	0	0
Morgen	12	9	12	10	45.75	26.56	62.75	62	33.8	19.37	32.15	20.87	21	22	37.52	62.41	29.55	26.99	9	10	7	12	30.11	36.1	27.14	53.08	31.68	38.71	17.86	29.37	19	19	33.26	43.53	34.71	28.26	0	0
Mörtel	9	11	11	12	71.33	59.45	77.55	75.67	27.3	24.35	20.79	28.53	20	23	64.8	76.57	25.74	24.59	10	8	10	9	-1	-8.38	1.8	6.56	15.2	17.31	31.03	8.73	18	19	-4.28	4.05	16.12	22.83	.03	0
Moskito	10	9	13	9	81.6	83.11	78.69	77.11	20.17	14.27	30.48	23.7	19	22	82.32	78.05	17.16	27.31	9	9	9	10	-9.78	-33.33	-45.78	-60.6	27.66	29.84	30.14	30.8	18	19	-21.56	-53.58	30.43	30.59	0	0
Motiv	11	9	12	10	33.82	40	49.17	41.7	34.9	26.12	35.45	32.86	20	22	36.6	45.77	30.63	33.69	10	8	9	10	7.8	6.25	11	26.8	21.95	24.6	12.67	21.64	18	19	7.11	19.32	22.47	19.26	0	0
Motor	9	10	13	10	74.89	77	89.77	85.9	20.97	23.31	14.74	16.86	19	23	76	88.09	21.64	15.44	10	8	8	11	9	-2	32.5	34.09	39.65	17.05	31.15	21.38	18	19	4.11	33.42	31.36	25.14	0	0
Motorrad	10	9	12	11	89.3	95.11	97.75	92.09	12.6	8.05	3.52	6.8	19	23	92.05	95.04	10.82	5.97	7	11	10	9	18.14	4.82	17.3	4.67	36.49	21.55	44.31	21	18	19	10	11.32	28.07	34.93	0	0
Motte	9	11	11	12	86.78	86.45	84.36	84.58	17.33	12.86	18.08	27.47	20	23	86.6	84.48	14.61	22.94	9	9	9	10	-13.33	-21.56	-48.56	-45.5	32.97	33.59	26.51	37.52	18	19	-17.44	-46.95	32.57	31.92	0	0
Möwe	10	9	12	11	92.1	96.56	96.17	89.73	7.52	3.09	4.75	14.14	19	23	94.21	93.09	6.14	10.63	10	8	9	10	29.3	49.5	43.11	45.1	24.99	32.66	24.3	24.44	18	19	38.28	44.16	29.61	23.71	0	0
Mücke	10	10	12	11	95.9	93	95.33	89.27	5.2	7.16	7.11	17.65	20	23	94.45	92.43	6.27	13.29	9	10	10	9	-29.22	-45.9	-23.6	-35.67	39.06	29.25	53.69	31.6	19	19	-38	-29.32	34.34	43.86	0	0
Mühe	10	12	14	9	26.7	21.5	47.21	36.33	28.51	12.24	35.61	25.43	22	23	23.86	42.96	20.83	31.84	9	10	11	8	-21.56	-8.4	5.27	2.25	41.79	25.92	42.06	55.43	19	19	-14.63	4	34.02	46.69	0	0
Mühle	11	8	12	11	82.36	92.25	96.58	88.82	19.56	6.48	6.2	15.18	19	23	86.53	92.87	15.94	11.82	9	9	9	10	17.56	31.89	39.44	38.3	7.94	37.02	20.34	29.93	18	19	24.72	38.84	27	25.14	0	0
Mühlrad	9	10	12	11	86.89	74.5	90	84.55	14.41	27.95	16.72	18.88	19	23	80.37	87.39	22.87	17.59	10	8	9	10	17.3	22.13	41.78	18.6	13.16	32.69	29.39	26.88	18	19	19.44	29.58	23.19	29.78	0	0
Mulde	11	8	12	11	67.91	69.63	79.58	78.55	13.03	16.42	28.44	27.29	19	23	68.63	79.09	14.14	27.26	8	10	9	10	-6.75	3.7	13.44	8.1	26.26	18.36	19.07	8.16	18	19	-.94	10.63	22.16	14.23	0	0
Müll	10	11	11	12	79.5	81.36	89	82.58	21.7	22.26	14.55	21.35	21	23	80.48	85.65	21.46	18.3	11	9	10	9	-44.27	-40.44	-47.9	-61.33	19.43	29.38	31.23	24.67	20	19	-42.55	-54.26	23.79	28.38	0	0
Mülleimer	10	11	12	11	85.6	89.82	94.92	85.73	11.39	12.94	5.18	18.2	21	23	87.81	90.52	12.11	13.64	8	10	8	11	-23.25	-22.2	-18.63	-10.45	30.78	19.4	32.4	32.95	18	19	-22.67	-13.89	24.28	32.07	0	0
Müllwagen	10	11	12	11	88.3	82.82	94.42	90.18	10.9	15.57	10.26	9.62	21	23	85.43	92.39	13.52	9.97	7	11	9	10	-3.71	-25.27	10.33	-11.6	37.54	17.25	36.39	18.12	18	19	-16.89	-1.21	28.1	29.66	0	0
Mumie	10	10	12	11	83	88	81.58	77.82	18.31	13.98	21.38	23.13	20	23	85.5	79.78	16.06	21.8	9	10	10	9	-5.11	-22.8	-26.8	-27.44	39.69	28.46	32.35	45.83	19	19	-14.42	-27.11	34.46	38.17	0	0
Mund	11	8	11	12	95.91	94.5	98.36	90.92	4.09	8.91	3.67	13.08	19	23	95.32	94.48	6.38	10.3	9	10	9	11	52.78	33.8	35.56	41.64	24.84	33.34	21.13	34.91	19	20	42.79	38.9	30.41	28.97	0	0
Mündigkeit	10	9	13	10	22	12.67	30.08	36.4	27.15	14.34	33.29	31.76	19	23	17.58	32.83	21.98	32.05	7	11	9	10	23.14	5	8.89	23.6	28.72	22.76	43.3	28.25	18	19	12.06	16.63	26.05	35.91	0	0
Münze	9	10	11	12	82.67	88.8	98	90.25	17.62	11.66	3	10.29	19	23	85.89	93.96	14.69	8.53	10	8	10	9	15.9	9.25	37.5	38.56	27.4	11.2	30.3	16.45	18	19	12.94	38	21.47	24.07	0	0
Murmel	11	10	13	10	88	93.8	91.46	87.7	17.6	3.65	10.86	19.52	21	23	90.76	89.83	13.03	14.96	9	10	9	10	28	28.7	25.44	29.7	23.92	28.78	31.73	20.98	19	19	28.37	27.68	25.86	25.93	0	0
Murmeltier	10	11	11	11	83.9	68.09	91.27	80	11.19	25.07	11.2	21.74	21	22	75.62	85.64	20.88	17.84	9	9	10	9	34	54.78	54.7	23.33	36.86	32.23	24.15	27.98	18	19	44.39	39.84	35.25	29.97	0	0
Muschel	11	10	12	11	91.91	93.9	93.58	87.73	8.13	5.32	11.6	13.29	21	23	92.86	90.78	6.84	12.51	10	8	10	8	22.8	53.63	19	28	37.47	28.84	38.22	18.72	18	18	36.5	23	36.53	30.64	0	0
Musik	10	9	13	10	55.8	49.11	51.77	71	33.07	28.27	30.71	34.16	19	23	52.63	60.13	30.23	32.96	9	9	10	9	60.22	78.22	53.9	74.44	34.09	28.98	30.82	16.55	18	19	69.22	63.63	32.06	26.6	0	0
Musiker	10	11	12	10	64.7	67	81.33	86.2	35.75	23.22	20.58	18.41	21	22	65.9	83.55	29.09	19.32	10	8	9	11	40.9	48.5	44.33	61.18	45.66	33.66	21.51	20.04	18	20	44.28	53.6	39.82	21.91	0	0
Muskel	10	10	11	12	65.4	81.6	71.73	79.17	28.09	20.15	20.73	26.04	20	23	73.5	75.61	25.2	23.43	8	10	9	10	20.88	8.2	24.22	30.3	35.23	12.58	19.42	24.82	18	19	13.83	27.42	25.23	22.03	0	0
Müsli	10	11	11	12	74.3	90	80.27	84.83	33.88	10.52	21.49	15.98	21	23	82.52	82.65	25.22	18.52	9	10	10	9	26.11	36.1	42.5	53.33	27.34	40.96	31.62	44.74	19	19	31.37	47.63	34.6	37.69	0	0
Muße	11	9	13	10	21	19.33	49.77	54.4	24.54	21.11	34.47	33.91	20	23	20.25	51.78	22.48	33.52	10	8	9	10	15.4	11.38	38.22	52.5	18.74	18.68	26.86	36.23	18	19	13.61	45.74	18.27	32.1	0	0
Mut	11	10	12	12	27	19.4	44.75	44.5	23.64	16.52	38.11	33.61	21	24	23.38	44.63	20.43	35.14	9	10	11	8	52.33	60.6	61.18	40.13	28.64	35.34	20.81	32.93	19	19	56.68	52.32	31.73	27.87	0	0
Mutter	10	10	12	10	70.4	74.5	79.92	96.3	29.85	23.81	31.93	3.27	20	22	72.45	87.36	26.36	24.67	10	9	10	9	65.9	61.56	86.9	83.67	28.92	37.59	21.15	14.89	19	19	63.84	85.37	32.42	18.03	0	0
Mütze	10	11	11	12	87.5	96.18	96.91	90.42	14.1	5.4	3.42	12.3	21	23	92.05	93.52	11.12	9.59	8	11	9	10	18	15.27	40.56	28.1	21.14	18.69	29.24	18.88	19	19	16.42	34	19.23	24.47	0	0
Mythos	8	12	12	11	31.38	21.42	28.08	39.91	24.22	20.43	23.72	28.18	20	23	25.4	33.74	21.97	26.06	10	8	9	10	11.3	23.13	17.44	10.2	42.24	23.11	15.97	42.93	18	19	16.56	13.63	34.66	32.38	0	0
Nabel	11	10	12	11	89.09	81.9	79.42	79.91	11.89	14.48	16.96	26.97	21	23	85.67	79.65	13.37	21.78	10	8	9	10	39.9	21	17	4.5	38.45	30.09	24.94	11.74	18	19	31.5	10.42	35.34	19.66	0	0
Nachbar	11	8	12	11	53.82	45.13	76	73.64	30.88	16.19	29.47	25.61	19	23	50.16	74.87	25.52	27.09	9	9	10	10	13.11	-1	22.4	45.1	32.94	16.94	38.58	27.39	18	20	6.06	33.75	26.43	34.58	0	0
Nacht	9	10	12	10	61.44	71.7	79.42	78.9	39.01	30.39	18.65	19.19	19	22	66.84	79.18	34.14	18.44	9	10	8	11	49.11	38.5	10.75	10.27	31.86	30.68	28.83	45.13	19	19	43.53	10.47	30.84	38.14	0	0
Nachteil	11	11	13	10	18	11.27	30.23	37.7	19.18	12.16	33.13	21.1	22	23	14.64	33.48	16.05	28.2	10	8	9	10	-46	-39.38	-41.67	-35.5	26.88	11.65	40.26	33.87	18	19	-43.06	-38.42	21.21	36.11	0	0
Nachthemd	9	11	12	11	83.11	81	91.92	90.18	14.2	23.87	9.23	18.5	20	23	81.95	91.09	19.64	14.1	9	9	9	10	23.11	12.33	29.33	30.6	22.53	24.22	30.26	50.1	18	19	17.72	30	23.36	40.77	0	0
Nachtigall	10	11	11	12	72.3	75.64	97.64	88.33	24.26	18.12	4.63	20.38	21	23	74.05	92.78	20.78	15.49	8	10	8	11	56	47.6	67.88	55.09	22.14	38.79	31.13	25.38	18	19	51.33	60.47	31.89	27.87	0	0
Nachtisch	10	10	12	11	67.1	82.6	83.33	81.55	25.48	15.61	24.43	21.56	20	23	74.85	82.48	22.05	22.59	9	9	9	10	21.22	41	45.11	46.3	31.59	33.48	30.11	32.96	18	19	31.11	45.74	33.18	30.77	0	0
Nacken	10	11	12	11	77.3	82.55	81.25	88.27	23.72	22.18	17.99	22.25	21	23	80.05	84.61	22.5	19.99	8	10	11	8	-4.75	20	19.91	7.13	53.8	37.15	28.34	26.93	18	19	9	14.53	45.63	27.75	0	0
Nadel	9	12	9	13	89.78	92.08	89.33	86	8.81	10.26	21.56	17.77	21	22	91.1	87.36	9.51	18.98	9	10	9	10	-27.22	-20.8	6.56	7.1	24.76	34.86	33.63	19.01	19	19	-23.84	6.84	29.85	26.14	0	0
Nagel	10	10	12	11	90.9	94.8	94.58	89.45	15.01	4.16	8.26	23.68	20	23	92.85	92.13	10.91	17.2	11	8	9	10	-8.91	-4.75	13.11	1.4	15.2	10.77	22.93	18.63	19	19	-7.16	6.95	13.33	21.06	0	0
Nagellack	10	11	11	11	62	89	76.55	89.64	26.7	10.38	26.88	14.83	21	22	76.14	83.09	23.79	22.22	11	7	10	9	-7.55	7.14	-14.4	13.11	14.56	33.03	25.89	15.24	18	19	-1.83	-1.37	23.75	25.25	0	0
Nähe	10	10	11	12	45.5	33.4	40.27	56	35.19	18.62	30.69	33.22	20	23	39.45	48.48	28.1	32.32	9	9	9	10	49.89	49.44	26.56	28.3	24.16	25.37	25.96	25.09	18	19	49.67	27.47	24.03	24.8	0	0
Name	10	9	12	11	28	27.78	49.75	61.36	29.77	31.15	40.28	33.62	19	23	27.89	55.3	29.57	36.88	9	9	9	11	16.67	-1	13.78	28.64	32.46	20.6	24.17	31.78	18	20	7.83	21.95	27.9	28.9	0	0
Namenstag	8	10	11	11	11.5	13.6	35.55	54.45	11.49	19.59	23.66	35.9	18	22	12.67	45	16.08	31.21	11	8	10	9	14.64	18.25	30.3	44.89	23.51	35.22	37.07	39.31	19	19	16.16	37.21	28.16	37.81	0	0
Napf	11	8	12	10	73.73	79.38	88.42	88.7	25.65	19.13	18.93	16.69	19	22	76.11	88.55	22.72	17.53	10	9	10	9	-8.8	8.44	4.8	2.22	25.93	13.73	8.39	27.11	19	19	-.63	3.58	22.32	19.07	0	0
Narbe	10	9	12	11	87.1	92.56	84.42	85.73	9.49	5.32	22.35	20.35	19	23	89.68	85.04	8.09	20.94	11	8	10	9	-17.45	-9.75	-29.3	-33.44	22.45	27.42	28.75	23.24	19	19	-14.21	-31.26	24.24	25.65	0	0
Narr	12	8	11	12	64	43	61.64	64.33	23.08	29.21	33.63	32.28	20	23	55.6	63.04	27.1	32.2	9	9	9	10	-24.56	-4.78	-13.33	2.7	22.19	24.38	32.68	32.63	18	19	-14.67	-4.89	24.8	32.79	0	0
Narzisse	12	7	13	10	68.08	72.57	88.92	92.4	26.09	27.2	16.12	10.31	19	23	69.74	90.43	25.84	13.72	11	8	9	10	14.27	36.38	60.89	42.5	26.24	48.1	27.41	26.07	19	19	23.58	51.21	37.52	27.62	0	0
Nase	10	11	12	11	94.9	92.73	97.83	93.55	6.28	11.43	2.59	7.41	21	23	93.76	95.78	9.18	5.75	7	11	8	11	13.43	9.18	20	37.45	28.76	26.98	29.11	34.38	18	19	10.83	30.11	26.92	32.63	0	0
Nasenloch	11	10	14	9	78	91	95.29	93.44	18.41	8.22	7.81	9.75	21	23	84.19	94.57	15.62	8.45	8	10	10	8	-8.38	2.1	18.2	15.75	14.88	14.1	30.9	25.86	18	18	-2.56	17.11	15	27.97	0	0
Nashorn	10	9	12	11	92.7	92	98.58	93	10.67	11.46	3.03	9.85	19	23	92.37	95.91	10.74	7.54	9	10	9	10	17.33	24.9	37.11	7.1	24.08	28.03	38.23	45.32	19	19	21.32	21.32	25.8	43.74	0	0
Nässe	9	10	13	10	59.22	62.5	69.54	68	25.71	20.47	26.17	34.26	19	23	60.95	68.87	22.5	29.23	11	7	8	11	-20.18	-26.43	-29.13	-44.82	26.89	16.81	23.17	30.27	18	19	-22.61	-38.21	23.13	27.95	0	0
Nation	10	8	11	11	39.2	25	49.18	53.64	28.74	19.12	35.44	36.77	18	22	32.89	51.41	25.31	35.32	9	9	10	10	-8	-13.22	27.1	20.2	41.01	41.69	30.24	20.43	18	20	-10.61	23.65	40.21	25.37	0	0
Natter	11	11	10	12	84.91	86	84.9	82.58	12.14	13.36	21.7	15.39	22	22	85.45	83.64	12.47	18.09	10	8	9	10	-7.8	-13	-35.11	-35.7	24.04	44.2	42.44	32.85	18	19	-10.11	-35.42	33.43	36.61	0	0
Natur	10	9	13	10	66	58	72.46	72.5	25.72	22.32	27.26	35.17	19	23	62.21	72.48	23.85	30.19	10	9	8	11	61.9	57.78	70.75	72.73	25.14	35.87	29.24	14.57	19	19	59.95	71.89	29.87	21.25	0	0
Nebel	10	10	11	11	84.4	90.4	80.55	82.36	11.43	10.23	23.28	22.62	20	22	87.4	81.45	11	22.42	8	10	8	11	17.5	1.4	-13.63	-31.64	36.65	46.74	24.28	32.23	18	19	8.56	-24.05	42.16	29.83	0	0
Neffe	12	9	13	10	31.42	37.89	55.85	67.5	35.75	32.42	42.9	28.23	21	23	34.19	60.91	33.68	36.94	10	8	10	9	2.9	14.63	30.9	40.33	36.46	29.97	37.47	30.85	18	19	8.11	35.37	33.31	33.89	0	0
Neglige	6	9	11	11	83.33	68.89	70.64	79.27	15.71	26.28	28.5	26.57	15	22	74.67	74.95	23.16	27.25	7	9	8	11	55.43	15.56	37.5	42.45	53.04	35.42	33.79	31.86	16	19	33	40.37	47.03	31.85	.18	.04
Neid	10	11	11	12	36.1	25.73	34.36	28.08	33.65	22.5	31.27	23.67	21	23	30.67	31.09	28.12	27.11	10	9	9	10	-62.9	-48.78	-66.56	-58	16.33	33.91	27.44	29.87	19	19	-56.21	-62.05	26.4	28.28	0	0
Neigung	9	10	14	9	34.78	24.5	38.07	46.89	33.61	29.38	28.99	31.36	19	23	29.37	41.52	31.01	29.56	9	9	9	10	-11.22	25.33	18.22	21.7	24.46	33.04	25.54	30.82	18	19	7.06	20.05	33.9	27.71	0	0
Nektar	10	11	11	12	60.1	58.73	63.27	62.33	30.48	29.5	30.67	27.9	21	23	59.38	62.78	29.22	28.58	9	9	9	10	18.89	33.78	51.67	42.3	27.55	38.07	31.04	27.28	18	19	26.33	46.74	33.14	28.69	0	0
Nelke	9	10	11	11	69.56	88.9	94.91	91.55	26.05	12.31	5.68	8.82	19	22	79.74	93.23	21.82	7.44	10	8	10	9	7.2	35.63	58.9	51.33	30.4	44.54	24.84	27.74	18	19	19.83	55.32	38.95	25.8	0	0
Neon	12	8	13	9	63.33	51.38	56.46	62	31.21	32.81	33.67	29.75	20	22	58.55	58.73	31.57	31.51	10	9	10	10	-11.5	5.56	18.1	-5.2	40.35	26.83	29.46	28.63	19	20	-3.42	6.45	34.8	30.69	0	0
Nest	11	9	13	10	81.45	87.78	96.23	86.3	13.42	16.41	4.94	16.7	20	23	84.3	91.91	14.79	12.36	11	8	10	9	29.82	46.63	40.2	38.44	19.84	33.35	32.24	23.72	19	19	36.89	39.37	26.9	27.76	0	0
Netz	9	11	13	10	78.22	89.64	90.46	89.2	22.58	11.14	16.53	19.89	20	23	84.5	89.91	17.72	17.64	9	9	9	10	-.44	-21.67	-6.89	19.5	35.1	20.41	23.38	42.12	18	19	-11.06	7	29.92	36.24	0	0
Neujahr	11	9	13	10	45.45	27.67	63.54	70.4	30.96	25.5	38.35	39.51	20	23	37.45	66.52	29.34	38.11	10	9	9	10	41.9	54.78	36	37.2	42.64	36.55	35.04	37.4	19	19	48	36.63	39.33	35.29	0	0
Nichte	11	9	12	11	45.91	39.78	64	79.09	39.15	26.35	38.05	24.75	20	23	43.15	71.22	33.3	32.58	10	8	9	10	20.2	12.63	43.11	55.1	26.82	19.61	31.74	31.38	18	19	16.83	49.42	23.54	31.27	0	0
Niere	10	10	12	10	73.6	68.8	89.17	84.5	21.58	28.7	15.94	22.68	20	22	71.2	87.05	24.84	18.95	9	10	9	10	-25	-14.4	13.67	7.6	20.18	15.06	23.01	29.36	19	19	-19.42	10.47	18	26	0	0
Nilpferd	9	9	12	11	94.89	90.89	94.5	81.55	6.45	16.48	10.23	20.96	18	23	92.89	88.3	12.31	17.2	10	8	10	9	36.6	35.5	37	32.44	24.83	26.02	32.26	39.42	18	19	36.11	34.84	24.61	34.88	0	0
Niveau	11	9	13	10	21	17.11	31.08	39	21.64	18.61	23.61	33.55	20	23	19.25	34.52	19.9	27.94	9	9	10	9	29.22	7.67	32	22.78	40.05	22.74	32.93	23.84	18	19	18.44	27.63	33.48	28.58	0	0
Nixe	12	8	10	12	75	82.63	71.7	76.83	20.02	19.75	20.34	25.49	20	22	78.05	74.5	19.76	22.91	9	10	8	11	27.56	35.8	36.25	20.64	32.53	29.17	39.83	23.38	19	19	31.89	27.21	30.23	31.36	0	0
Nonne	10	9	13	9	85	88.44	87.62	92.67	14.28	9.61	24.22	6.96	19	22	86.63	89.68	12.08	18.97	10	8	9	10	-19.2	4.63	41.56	7.3	23.66	28.57	27.01	58.77	18	19	-8.61	23.53	27.94	48.58	0	0
Nordsee	11	11	13	10	82.73	69.91	88.92	88.7	24.98	20.76	15.48	11.82	22	23	76.32	88.83	23.35	13.71	10	9	9	10	53.9	21.56	49	66.1	25.4	30.49	29.72	28.39	19	19	38.58	58	31.8	29.54	0	0
Nordwesten	10	10	12	11	48.2	24.2	48.33	47.27	36.61	25.37	40.76	33.71	20	23	36.2	47.83	33.04	36.71	9	9	9	10	9.89	19.78	3	9.5	22.15	36.37	7.89	24.25	18	19	14.83	6.42	29.65	18.25	0	0
Norm	10	10	12	11	24.6	24.1	45.42	27.18	24.92	15.35	36.27	24.91	20	23	24.35	36.7	20.15	32.04	8	11	9	10	-38.25	-20.45	-8.56	11.6	21.64	27.28	33.86	29.75	19	19	-27.95	2.05	26.02	32.54	0	0
Not	11	10	13	10	38.55	21.7	50.38	46.8	30.56	16.88	30.88	35.31	21	23	30.52	48.83	25.87	32.15	9	10	8	12	-53.33	-63.3	-58.75	-75.67	31.1	27.64	29.83	15.91	19	20	-58.58	-68.9	28.95	23.38	0	0
Note	10	11	13	10	74.1	85.55	67.54	80.2	29.05	17.86	26.78	26.17	21	23	80.1	73.04	23.95	26.69	9	9	8	11	-3.11	1.89	19.5	26.55	46.9	26.62	29.76	28	18	19	-.61	23.58	37.08	28.15	0	0
Notfall	10	11	11	11	43.6	38.82	56	57.18	27.57	26.68	35.34	32.34	21	22	41.1	56.59	26.53	33.06	10	8	10	9	-52.9	-54.63	-41.5	-54.56	26.79	31.74	43.88	33.97	18	19	-53.67	-47.68	28.21	38.99	0	0
Notiz	11	9	13	10	55.36	53.22	53.54	70.7	32.82	16.77	31.35	33.81	20	23	54.4	61	26.2	32.85	8	10	9	10	2	9.3	11.44	31.2	15.52	11.17	17.05	37.31	18	19	6.06	21.84	13.38	30.47	0	0
Nougat	11	9	13	10	74.27	82.33	82.31	86.5	19.28	13.84	22.06	12.37	20	23	77.9	84.13	17.12	18.24	7	12	8	11	20.57	14.5	54.13	60.64	38.48	51.32	28.84	23.35	19	19	16.74	57.89	45.96	25.25	0	0
Nudel	10	10	12	10	88.8	90.9	90.5	89.8	11.7	11.2	13.96	13.74	20	22	89.85	90.18	11.2	13.54	10	9	11	8	39.6	29.67	41.64	41	20.53	27.22	26.76	24.15	19	19	34.89	41.37	23.79	24.99	0	0
Nuss	10	9	12	11	88.6	91.33	94.83	90.27	14.83	8.59	7.36	12.03	19	23	89.89	92.65	12.03	9.92	10	9	10	9	20.3	26	41.7	52.22	17.64	25.58	22.45	20.84	19	19	23	46.68	21.33	21.77	0	0
Nüstern	10	9	11	11	79.1	81.78	76.27	79	26.16	21.14	28.36	27.16	19	22	80.37	77.64	23.29	27.14	9	10	8	11	21.22	19.2	11.88	12.64	26.65	23.47	22.73	26.98	19	19	20.16	12.32	24.33	24.6	.04	.04
Nutzen	11	8	12	11	13.73	18.63	28.83	36.55	14.37	15.7	30.5	28.29	19	23	15.79	32.52	14.72	29.06	9	10	8	11	21.33	20.7	36.38	22.64	39.32	29.49	22.2	31.99	19	19	21	28.42	33.5	28.44	0	0
Oase	12	10	12	11	77.33	92.4	88.58	71.91	20.82	14.78	12.17	24.31	22	23	84.18	80.61	19.49	20.38	9	10	9	10	65.67	60.6	46.44	60	19.97	34.25	55.93	32.34	19	19	63	53.58	27.76	44.29	0	0
Oberarm	12	10	13	10	79.58	93.2	92.23	85.4	22.93	5.51	13.99	16.32	22	23	85.77	89.26	18.35	15.09	10	8	10	10	18.5	6.5	18.7	30	38.52	33.24	30.43	25	18	20	13.17	24.35	35.75	27.72	0	0
Oblate	10	11	12	11	66.8	86.73	84.75	88.09	36.34	16.09	17.09	13.72	21	23	77.24	86.35	28.77	15.32	8	10	11	9	-1.5	18.1	27.73	39.56	37.01	23.96	31.03	29.58	18	20	9.39	33.05	31.12	30.19	0	0
Oboe	10	10	12	12	81.5	79.1	84	86.5	14.28	11.4	21.1	15.68	20	24	80.3	85.25	12.64	18.22	11	7	10	9	20.09	27.14	39.9	58.56	37.67	31.35	33.09	33.82	18	19	22.83	48.74	34.56	33.87	0	0
Obst	10	10	11	12	84.9	80.5	95	89.92	13.07	19.61	8.81	11.77	20	23	82.7	92.35	16.37	10.55	10	9	10	9	36.2	65.78	65.4	65.67	28.82	33.88	26.77	17.55	19	19	50.21	65.53	33.99	22.25	0	0
Ochse	11	9	13	10	84.36	79.89	94.15	86.7	11.57	18.72	7.57	12.42	20	23	82.35	90.91	14.94	10.42	10	8	10	9	23.5	3.75	24.3	2.44	12.05	15.4	36.89	23.59	18	19	14.72	13.95	16.63	32.45	.04	0
Ofen	9	13	12	11	83.22	90.31	92.33	95.82	15.92	6.75	11.48	3.84	22	23	87.41	94	11.63	8.71	9	9	9	10	27.33	38.78	35.56	45.7	31.22	33.54	25.28	21.63	18	19	33.06	40.89	31.98	23.35	0	0
Offenheit	10	11	12	11	23.5	20.73	24.25	33.82	23.21	20.93	22.05	28.04	21	23	22.05	28.83	21.53	24.98	9	10	9	10	62.56	47	65	62.8	28.07	35.71	32.43	36.44	19	19	54.37	63.84	32.43	33.66	0	0
Offizier	10	10	13	10	72.6	62.2	80.77	82.8	22.45	9.64	15.19	22.81	20	23	67.4	81.65	17.64	18.43	7	11	10	9	-25.14	-28.45	-23.7	-8.33	53.02	32.01	42.12	35.88	18	19	-27.17	-16.42	39.97	39	0	0
Ohr	9	10	13	10	93.11	94	91.54	93.6	8.05	9.08	20.25	8.04	19	23	93.58	92.43	8.38	15.85	10	8	10	9	27.3	25.63	29.6	27.33	25.7	38.13	32.42	34.31	18	19	26.56	28.53	30.81	32.41	0	0
Ohrfeige	10	10	12	11	69.8	71	82.58	78.09	20.9	26.03	22.92	25.9	20	23	70.4	80.43	22.98	23.94	9	10	9	11	-54.78	-49.4	-41.89	-60	32.88	29.9	26.11	20.9	19	20	-51.95	-51.85	30.58	24.54	0	0
Ohrring	9	12	11	11	88	90.17	93.45	87.91	15.76	9.4	11.18	13.25	21	22	89.24	90.68	12.21	12.3	10	8	9	10	20	43.13	10	30.8	33.23	42.38	33.25	38.17	18	19	30.28	20.95	38.26	36.52	0	0
Öl	12	9	12	11	76.75	82.67	85.58	86.55	20.19	13.25	17.22	14.73	21	23	79.29	86.04	17.42	15.72	9	9	8	11	-10.44	-16.78	25.88	23.18	40.04	30.84	30.84	33.99	18	19	-13.61	24.32	34.82	31.84	0	0
Olive	10	9	11	11	85.9	97	96	88.27	12.9	2.5	7.81	20.52	19	22	91.16	92.14	10.88	15.66	10	8	9	10	36.9	12.13	39.89	48.4	29.21	57.1	27.19	17.67	18	19	25.89	44.37	44.21	22.45	0	.04
Oma	11	9	13	10	75.82	85	87.69	91	24.51	17.74	23.96	10.12	20	23	79.95	89.13	21.7	18.91	10	9	9	11	47.9	58.44	82.78	90.36	40.07	43.42	24.71	9.57	19	20	52.89	86.95	40.87	17.9	0	0
Omelett	12	7	12	10	76.5	88.57	90.75	90.4	24.75	11.43	12.58	7.81	19	22	80.95	90.59	21.3	10.44	9	9	10	9	26.11	36.22	44.4	46.22	14.93	28.72	24.46	31.48	18	19	31.17	45.26	22.81	27.21	0	0
Omnibus	10	10	11	11	84.9	84.8	96.64	92.82	17.16	17.12	3.56	11.22	20	22	84.85	94.73	16.68	8.36	10	9	9	10	21.3	8.78	36.11	29.3	28.6	15.55	35.69	26.17	19	19	15.37	32.53	23.62	30.34	0	0
Onkel	9	11	13	10	67.22	63.64	72.77	82.5	22.45	24.32	31.89	26.16	20	23	65.25	77	22.96	29.31	9	9	11	8	42.78	13.44	45.55	42.25	31.82	42.21	41.87	35.04	18	19	28.11	44.16	39.28	38.13	0	0
Opa	10	11	12	11	69.1	85.27	89.75	94.73	24.01	13.13	15.73	8.36	21	23	77.57	92.13	20.35	12.73	9	9	9	10	17.44	48.78	75	74.5	49.81	56.58	29.84	35.75	18	19	33.11	74.74	54.17	32.17	0	0
Opfer	10	9	10	13	52.3	36.22	45	59.92	29.15	24.35	27.82	26.5	19	23	44.68	53.43	27.5	27.51	10	9	10	10	-53.7	-66.56	-40.7	-42.4	20.26	28.76	42.72	29.35	19	20	-59.79	-41.55	24.83	35.68	0	0
Opium	10	10	14	9	44.3	37	52.21	65.44	36.41	24.8	35.83	34.94	20	23	40.65	57.39	30.55	35.3	11	8	9	10	-17.73	-12.13	-51.78	-61.5	39.2	39.68	26.71	30.6	19	19	-15.37	-56.89	38.4	28.46	0	0
Orchester	11	7	12	11	80.09	83.43	90.33	81	16.33	19.16	11.64	24.16	18	23	81.39	85.87	17.01	18.86	8	11	8	11	32	39.64	43.63	66.27	31.83	36.38	25.64	25.35	19	19	36.42	56.74	33.83	27.29	0	0
Orden	10	10	12	11	81.3	60.4	93.25	75.55	19.55	29.59	10.21	30.76	20	23	70.85	84.78	26.66	23.75	8	11	8	11	8.25	11	-12.75	14.36	35.34	20.78	34.28	42.33	19	19	9.84	2.95	26.97	40.52	0	0
Ordnung	11	9	13	10	34.55	32.78	50.77	55.9	28.23	24.84	23.97	33.48	20	23	33.75	53	26.07	27.91	9	10	10	9	12	4.1	48.8	50.11	20.59	25.96	34.96	40.73	19	19	7.84	49.42	23.28	36.72	0	0
Organ	10	9	12	11	61.8	63.22	75.5	78.55	28.06	18.45	22.58	19.22	19	23	62.47	76.96	23.36	20.62	10	9	9	10	10.2	-5.44	19.33	13.3	29.04	12.17	28.39	20.7	19	19	2.79	16.16	23.49	24.13	0	0
Orgel	11	9	12	11	84.82	92.11	95.33	88.27	15.91	7.17	7.89	15.5	20	23	88.1	91.96	12.99	12.38	10	9	10	9	13.6	38.22	47.6	53.56	26.49	32.96	24.29	28.36	19	19	25.26	50.42	31.52	25.73	0	0
Orkan	10	10	11	12	64.9	59.8	70.73	79.17	24.88	27.01	22.39	24.27	20	23	62.35	75.13	25.41	23.26	10	8	8	11	-32.5	-45	-58.13	-68.18	36.37	34.18	31.17	21.09	18	19	-38.06	-63.95	34.96	25.51	0	0
Ort	11	9	11	11	43.18	43.44	52.73	70	30.88	26.55	31.74	21.5	20	22	43.3	61.36	28.26	27.89	6	12	8	11	6.67	7.17	4	25.55	12.55	17.31	7.45	27.24	18	19	7	16.47	15.5	23.52	0	0
Osten	10	10	11	12	30.9	35.8	59.18	54.08	35.27	28.22	28.41	38.71	20	23	33.35	56.52	31.19	33.51	8	10	10	9	4.13	-4.4	10	33.33	48.16	28.52	24.39	17.72	18	19	-.61	21.05	37.47	24.09	0	0
Ostern	13	8	13	11	57.08	63.13	78.23	70	23.27	20.43	26.28	26.54	21	24	59.38	74.46	21.91	26.16	9	9	9	10	38.56	36.56	66.56	48	31.64	36.53	29.88	29.57	18	19	37.56	56.79	33.17	30.41	0	0
Ostsee	10	9	13	10	77.5	86.67	83.15	86.5	28.93	16.02	22.69	20.15	19	23	81.84	84.61	23.55	21.21	11	8	9	10	53.36	62.38	48.44	75.5	31.86	35.67	31.85	17.98	19	19	57.16	62.68	32.86	28.37	0	0
Otter	11	8	11	12	79.09	81.88	89	82.25	18.45	15.58	15.84	24.77	19	23	80.26	85.48	16.89	20.8	10	8	8	11	34.9	19.88	16	9.27	35.23	35.67	35.03	47.45	18	19	28.22	12.11	35.21	41.71	0	0
Ozean	11	8	12	10	76.91	86.63	92.42	83.8	22.36	12.44	7.13	19.05	19	22	81	88.5	19.04	14.19	9	9	9	10	70.33	74.11	30.33	31.6	31.39	26.47	32.42	38.56	18	19	72.22	31	28.24	34.79	0	0
Paar	11	9	13	10	61	71.11	82.69	83.5	29.21	29.34	24.31	16.04	20	23	65.55	83.04	28.95	20.68	9	9	9	10	57.78	38.67	33.33	33.5	29.06	35.37	24.74	35.91	18	19	48.22	33.42	32.91	30.28	0	0
Päckchen	10	10	11	12	83.6	86.8	90.36	86.25	14.69	13.6	17.85	14.65	20	23	85.2	88.22	13.87	16.01	10	8	9	11	33.2	45.5	28	35.18	25.66	28.41	25.79	30.77	18	20	38.67	31.95	26.84	28.14	0	0
Paddel	11	10	12	11	85.55	88.4	90.67	86.45	20.04	9.61	13.08	21.36	21	23	86.9	88.65	15.64	17.25	11	8	10	10	30.82	22.25	24.1	7.2	28.56	24.02	23.6	30.48	19	20	27.21	15.65	26.39	27.91	0	0
Page	11	10	12	11	74.91	70.4	72.83	72.27	22.51	22.39	29.87	26.35	21	23	72.76	72.57	22.01	27.6	9	9	9	10	-.67	.67	22.89	4.5	31	16.93	27.93	11.69	18	19	0	13.21	24.24	22.45	0	0
Paket	9	10	13	10	83.56	89.6	94.15	89.2	12.36	9	8	13.37	19	23	86.74	92	10.86	10.69	10	8	10	9	21.6	35.88	29.6	44.56	23.32	32.43	21.24	35.82	18	19	27.94	36.68	27.82	29.23	0	0
Palast	10	11	14	9	81.3	81	89.64	80.33	26.27	15.02	11.85	15.16	21	23	81.14	86	20.57	13.71	9	10	9	10	12.56	33.1	18.67	16.3	47.33	30.59	24.15	47.96	19	19	23.37	17.42	39.68	37.56	0	0
Palme	9	10	12	11	90.33	94.4	95.25	88.09	13.58	7.09	8	13.67	19	23	92.47	91.83	10.56	11.42	9	10	9	10	41.22	56.1	44.67	44.8	19.91	43.58	20.24	19.08	19	19	49.05	44.74	34.41	19.08	0	0
Panik	10	9	12	11	53.5	45.22	37.08	56.82	33.27	25.03	26.47	29.45	19	23	49.58	46.52	29.16	29.09	8	10	9	10	-55.38	-61.9	-73.89	-68	20.96	26.58	18.18	22.66	18	19	-59	-70.79	23.79	20.32	0	0
Panther	11	10	13	10	86.73	94.3	95.46	81.9	15.82	5.93	5.14	25.94	21	23	90.33	89.57	12.49	18.35	10	8	9	10	34.5	36.88	-29.44	-17	20.82	43.99	59.01	51.05	18	19	35.56	-22.89	32.06	53.77	0	0
Pantoffel	10	12	14	9	76	91.58	94.93	90.33	27.66	8.68	6.11	10.33	22	23	84.5	93.13	20.75	8.13	10	9	9	10	1.8	23.56	25.44	23.5	26.21	24.1	20.27	20.64	19	19	12.11	24.42	26.95	19.91	0	0
Panzer	12	8	13	10	91.5	91.63	93.38	81.5	10.71	7.58	10.19	28.11	20	23	91.55	88.22	9.36	20.4	10	8	9	10	-42.6	-56.13	-61.44	-63.6	44.75	37.51	25.97	27.32	18	19	-48.61	-62.58	41.08	25.96	0	0
Papagei	9	11	11	12	93.11	94.09	91	93.33	9.93	5.56	14.65	6.62	20	23	93.65	92.22	7.62	11	10	8	10	9	35.6	40.5	45.2	29.44	36.8	46.36	35.12	24.91	18	19	37.78	37.74	40.1	30.95	0	0
Papier	11	10	11	12	76.09	90.5	88.91	87.5	22.57	13.79	17.28	16.45	21	23	82.95	88.17	19.86	16.47	7	11	10	9	11.43	15.18	24.8	39	11.87	21.08	29.65	32.35	18	19	13.72	31.53	17.74	30.95	0	0
Pappe	9	11	11	12	75.33	78.82	85.55	88.67	19.1	19.86	16.09	13.38	20	23	77.25	87.17	19.09	14.48	10	9	10	9	2	8.56	11.1	17.22	15.87	15.03	12.56	17.63	19	19	5.11	14	15.41	15.06	0	0
Paprika	10	10	12	10	89.1	94.3	94.75	86.9	13.68	7.27	8.82	15.81	20	22	91.7	91.18	10.99	12.8	9	9	9	10	35.22	21.44	46.33	35	14.05	25.75	24.46	22.22	18	19	28.33	40.37	21.34	23.38	0	0
Papst	11	10	13	10	86.64	83.9	90	83.7	11.89	14.84	15.4	27.39	21	23	85.33	87.26	13.1	21.13	10	8	9	10	-55.2	-9.38	20.44	13.6	53.04	22.53	44.58	45.32	18	19	-34.83	16.84	47.41	43.85	0	0
Papyrus	9	11	11	11	72	67.73	60.09	71.91	19.78	21.95	30.93	31.18	20	22	69.65	66	20.57	30.9	9	9	9	10	15.22	27.44	8.44	24.4	13.04	26.19	14.66	25.01	18	19	21.33	16.84	21.03	21.8	0	0
Parade	12	9	13	10	79.25	74.11	75.23	73.3	18.99	17.74	21.59	26.95	21	23	77.05	74.39	18.19	23.5	10	8	8	11	-2.5	28.75	-1.88	9.73	38.04	50.95	46.15	29.69	18	19	11.39	4.84	45.72	36.78	0	0
Paradies	8	11	10	12	56.38	61.64	55.2	50.67	26.4	27.09	34	35.47	19	22	59.42	52.73	26.19	34.05	9	9	10	9	48.67	71.56	73.7	59.22	52.19	29	27.86	30.79	18	19	60.11	66.84	42.62	29.41	0	0
Parfum	12	8	14	9	81.5	80.38	68.64	70.56	19.11	19.46	32.83	34.17	20	23	81.05	69.39	18.75	32.59	10	8	10	9	39.9	42.5	22	47.22	19.39	31.89	27.3	29.12	18	19	41.06	33.95	24.89	30.28	0	0
Park	11	10	13	10	85.36	81.1	86.15	90.7	12.27	12.91	14.21	11.81	21	23	83.33	88.13	12.45	13.14	9	10	10	9	44	50.2	62.6	59.22	25.5	34.17	27.97	19.12	19	19	47.26	61	29.72	23.59	0	0
Parole	11	9	11	12	39.91	15.56	40.73	25.17	35.8	17.61	31.98	25.61	20	23	28.95	32.61	30.98	29.26	12	6	9	10	-34.92	-30	-16.89	-8.5	19.03	26.47	24.52	14.29	18	19	-33.28	-12.47	21.12	19.69	0	0
Partei	10	9	11	12	44.9	36.33	50.91	53.08	31.75	26.36	30.01	31.15	19	23	40.84	52.04	28.84	29.93	8	11	9	10	-27	-32.91	-11.67	-7.4	42.57	28.8	29.28	37.12	19	19	-30.42	-9.42	34.27	32.79	0	0
Pascha	11	10	13	10	42.64	41.6	58.69	67.3	30.18	15.9	32.38	32.22	21	23	42.14	62.43	23.87	31.87	8	10	9	11	-29.63	-51.8	-22.22	-33.64	30.48	34.64	36.3	41.19	18	20	-41.94	-28.5	33.86	38.49	0	0
Pass	10	10	12	10	75	82.3	84	85.3	22.24	21.11	18.39	20.14	20	22	78.65	84.59	21.43	18.75	9	10	10	9	-10.11	5.1	33.3	31.44	34.05	24.33	24.87	19.27	19	19	-2.11	32.42	29.53	21.8	0	0
Passagier	10	9	13	10	44.1	50.56	79.77	78.4	29.41	18.34	21.76	15.77	19	23	47.16	79.17	24.35	18.99	8	10	8	11	19.38	18.4	25.38	16.55	23.74	19.2	19.18	18.45	18	19	18.83	20.26	20.67	18.77	0	0
Paste	10	11	11	12	66.7	60.64	79.18	78.42	19.08	21.39	16.67	21.37	21	23	63.52	78.78	20.06	18.84	8	10	10	10	21.75	5.7	11.6	10.2	15.52	12.29	20.39	18.55	18	20	12.83	10.9	15.7	18.98	0	0
Patent	11	8	12	11	29	14.5	46.5	54.18	32.91	16.22	36.04	32.36	19	23	22.89	50.17	27.53	33.78	10	8	10	9	19	14.75	23.5	31.33	21.04	25.8	30.83	26.13	18	19	17.11	27.21	22.66	28.19	0	0
Pater	9	11	12	11	43.33	62.27	75.33	66.27	41.51	25.36	30.17	28.07	20	23	53.75	71	34.02	28.89	9	9	8	11	-14.78	2.11	29.88	7.55	51.14	12.05	30.5	41.71	18	19	-6.33	16.95	37.08	38.16	0	0
Patrone	11	9	12	11	81.09	74.22	76.92	80.36	28.57	17.81	23.94	24.04	20	23	78	78.57	23.99	23.5	10	9	10	9	-9.7	-19.33	-53.9	-49.56	32.21	34.5	26.66	34.78	19	19	-14.26	-51.84	32.74	29.97	0	0
Pause	10	11	14	9	35	37.09	44.71	56.89	25.71	22.23	29.25	37.58	21	23	36.1	49.48	23.36	32.5	9	9	11	8	33.33	40.44	41	43.13	36.97	32.11	28.99	27.86	18	19	36.89	41.89	33.79	27.74	0	0
Pedal	10	9	12	11	78	80.11	94.33	85.45	19.73	13.68	9.2	12.39	19	23	79	90.09	16.7	11.52	9	10	9	10	12.22	9.3	21.89	20.4	27.28	15.85	21.72	21.1	19	19	10.68	21.11	21.41	20.81	0	0
Pedant	10	9	10	13	33.9	28.33	46.2	59.46	35.44	25.37	35.93	30.18	19	23	31.26	53.7	30.37	32.71	10	7	9	10	-40.7	-51.29	-38.56	-20.1	30.5	46.31	31.67	28.88	17	19	-45.06	-28.84	36.83	30.86	.03	0
Peitsche	12	10	12	11	77.92	89.8	90.08	90.55	17.99	8.57	15.73	10.66	22	23	83.32	90.3	15.42	13.25	10	8	11	8	-20	-47.13	-47.91	-49.13	47.85	29.9	28.24	44.19	18	19	-32.06	-48.42	42.11	34.68	0	0
Pelikan	12	9	12	10	91.17	90.67	89.58	82.3	9.65	11.96	12.57	26.83	21	22	90.95	86.27	10.41	20.13	9	9	11	8	27.11	32.44	50.55	36	33	33.88	24	23.66	18	19	29.78	44.42	32.56	24.34	0	0
Pelz	11	9	12	11	79.91	83.67	89.17	88.27	19.73	14.13	10.9	11.88	20	23	81.6	88.74	17.1	11.13	10	8	10	9	-2.8	-5.38	18.5	35.11	24.72	35.05	21.58	29.83	18	19	-3.94	26.37	28.82	26.47	0	0
Pergament	11	10	13	10	65.82	75.4	68.15	87.4	26.92	20.38	26.55	13.93	21	23	70.38	76.52	23.94	23.65	9	9	8	12	18.11	20.44	9.75	25.75	21.19	26.51	10.25	25.65	18	20	19.28	19.35	23.31	22.01	0	0
Perle	9	10	13	10	92.89	92.3	91.31	88.4	7.67	11.11	14.65	14.07	19	23	92.58	90.04	9.38	14.15	9	10	8	11	38.33	52.1	36.38	57.09	26.05	32.66	23.37	23.51	19	19	45.58	48.37	29.75	25.1	0	0
Person	9	10	14	9	34.44	55.1	71.21	75.89	24.83	26.76	26.32	33.43	19	23	45.32	73.04	27.28	28.66	11	7	10	10	6.55	-5.29	10.4	26.3	20.53	24.7	10.61	34.49	18	20	1.94	18.35	22.33	26.14	0	0
Perücke	11	9	12	11	81.36	85.67	89.25	89.64	20.21	17.99	13.98	15.4	20	23	83.3	89.43	18.87	14.34	10	9	9	10	-33.3	-7.89	-17.89	-.6	27.79	17.57	26.72	30.79	19	19	-21.26	-8.79	26.33	29.49	0	0
Pest	9	10	11	11	50.89	40.9	47.73	63.09	28.29	30.93	34.14	30.53	19	22	45.63	55.41	29.33	32.57	9	9	10	10	-70.67	-80.67	-91.4	-83.7	24.76	30.1	15.12	15.38	18	20	-75.67	-87.55	27.22	15.36	0	0
Pfad	10	11	12	10	69.8	71.73	85.75	81.6	24.47	20.05	18.41	21.3	21	22	70.81	83.86	21.71	19.4	9	9	10	10	18.44	30.56	27.8	23.1	20.92	28.44	20.32	23.36	18	20	24.5	25.45	25.01	21.44	0	0
Pfahl	9	11	12	11	69.78	79.27	94	83.55	28.63	17.23	9.9	20.15	20	23	75	89	22.91	16.19	11	8	10	9	-15.36	-14	2.6	7.11	41.99	17.9	20.2	16.21	19	19	-14.79	4.74	33.24	18.06	0	0
Pfand	12	9	12	11	43.17	37.44	42.42	73.91	30.08	20.43	31.97	23.48	21	23	40.71	57.48	25.94	31.94	8	10	10	9	-1.13	-7.8	-5.6	2.67	33.38	18.8	16.26	10	18	19	-4.83	-1.68	25.64	13.95	0	0
Pfanne	10	11	11	12	90.9	93.45	96.82	89.42	7.99	10.31	4.35	10.24	21	23	92.24	92.96	9.14	8.68	8	11	10	9	24.88	11.91	28.5	23.33	26.55	24	30.54	25.41	19	19	17.37	26.05	25.24	27.57	0	0
Pfarrei	11	8	12	10	52.64	44.5	57.92	79.2	37.52	20.84	37.07	22.97	19	22	49.21	67.59	31.12	32.61	9	7	9	10	-24	-12.43	26.22	14.5	36.38	25.67	35.31	35.9	16	19	-18.94	20.05	31.7	35.14	.07	0
Pfarrer	9	11	13	9	74.11	72.36	81	81.78	23.2	25.8	26.46	23.96	20	22	73.15	81.32	24.04	24.88	10	8	9	10	-3.4	-1.88	39.33	11.5	65.33	16.34	36.77	38.76	18	19	-2.72	24.68	48.68	39.44	0	0
Pfau	11	9	13	10	85.73	93.78	97.08	91.1	13.37	7.34	3.86	7.05	20	23	89.35	94.48	11.56	6.13	9	9	8	11	29.89	36.11	58.25	44.27	35.53	29.77	30.52	27.34	18	19	33	50.16	31.96	28.77	0	0
Pfeffer	10	10	11	12	80.3	87.4	90.91	86.33	22.4	13.66	12.7	17.93	20	23	83.85	88.52	18.42	15.47	10	9	9	10	16.8	26.78	9.33	14.8	24.6	22.42	38.72	23.04	19	19	21.53	12.21	23.5	30.65	0	0
Pfeife	11	10	12	10	83.18	89.9	95.83	90.3	16.59	9.24	5.37	12.45	21	22	86.38	93.32	13.71	9.46	11	8	9	10	-2.91	4.75	3.89	14.3	23.62	28.63	32.55	33.1	19	19	.32	9.37	25.38	32.36	0	0
Pfeil	10	11	14	9	87.9	87.73	92.57	76.11	14.45	13.09	10.49	24.52	21	23	87.81	86.13	13.4	18.74	9	9	10	9	.89	-8	-5.9	-23.56	29.4	25.59	34.92	31.76	18	19	-3.56	-14.26	27.13	33.76	0	0
Pfennig	10	10	11	12	90	87.8	93.82	94.67	9.26	14.22	7.86	6.49	20	23	88.9	94.26	11.73	7.02	8	10	10	9	20.88	3.9	19.6	31.22	13.89	10.68	26.89	25.98	18	19	11.44	25.11	14.67	26.4	0	0
Pferd	10	10	11	11	88.2	97.1	97.91	95.27	11.4	4.65	3.94	5.5	20	22	92.65	96.59	9.63	4.86	9	9	9	10	34.11	37.89	63.56	41.3	38.83	33.68	27.51	33.37	18	19	36	51.84	35.32	31.99	0	0
Pfiff	11	11	12	10	61.64	47.09	55.08	60.5	34.56	36.14	41.16	29.91	22	22	54.36	57.55	35.3	35.76	10	9	9	10	6	6.89	2.67	-2.4	22.73	30.21	37.07	10.85	19	19	6.42	0	25.77	26.01	0	0
Pfingsten	10	10	10	12	31.2	25.7	43.9	63.42	34.99	23.7	35.09	30.97	20	22	28.45	54.55	29.23	33.6	9	10	10	9	35.11	22.6	59.4	45.56	22.78	47.78	26.57	31.22	19	19	28.53	52.84	37.59	28.93	0	0
Pfirsich	12	8	13	11	87.83	93.88	97.08	91.82	15.11	8.1	2.78	10.08	20	24	90.25	94.67	12.87	7.44	11	7	10	9	39.64	52.14	58.9	62.11	29.1	36.91	21.89	20.3	18	19	44.5	60.42	31.91	20.63	0	0
Pflanze	10	9	10	12	78.9	84.78	90.7	83.17	15.48	14.12	16.06	14.84	19	22	81.68	86.59	14.75	15.51	9	9	8	11	29.78	46	38.5	48.18	38.29	27.83	28.87	26.98	18	19	37.89	44.11	33.53	27.43	0	0
Pflaster	10	9	12	11	86.7	88.67	84.25	85	14.41	14.81	22.16	17.36	19	23	87.63	84.61	14.22	19.56	8	10	10	9	-.88	3.1	15.9	-3.78	36.26	24.15	38.03	29.12	18	19	1.33	6.58	29.23	34.67	0	0
Pflaume	11	9	11	11	89.36	92.89	98.64	90.45	9.58	6.85	2.69	8.76	20	22	90.95	94.55	8.44	7.58	10	9	8	11	35.7	35.56	53.5	42.82	14.71	28.56	30.51	20.47	19	19	35.63	47.32	21.7	24.98	0	0
Pfleger	8	12	11	11	57.25	68.67	61.45	84.55	27.59	21.61	31.43	24.32	20	22	64.1	73	24.16	29.86	9	9	9	10	-8.11	-6.33	38.11	43.5	53.36	31.58	38.49	25.13	18	19	-7.22	40.95	42.54	31.33	0	0
Pflicht	12	8	14	10	23.42	19.13	31.21	39.7	25.7	15.42	33.56	22.42	20	24	21.7	34.75	21.79	29.18	10	9	9	10	-17.4	-35.56	14.56	36.1	40.97	28.94	29.84	31.09	19	19	-26	25.89	36.03	31.64	0	0
Pflug	10	11	11	12	81.2	80.09	97.36	91.75	20.56	17.04	4.18	9.33	21	23	80.62	94.43	18.33	7.73	8	10	9	11	6.13	3.3	40.44	17.45	19.33	11.1	35.61	14.93	18	20	4.56	27.8	14.87	28.09	0	0
Pförtner	10	10	12	11	64.7	71.8	87.75	86.09	31.02	18.18	14.01	20.06	20	23	68.25	86.96	25.02	16.79	9	9	8	11	4.78	-6.56	12.25	13.82	14.79	18.84	29.56	24.65	18	19	-.89	13.16	17.43	26.04	0	0
Pfote	11	10	11	12	86.55	92.8	88.91	89.67	9.41	7.27	11.95	11.1	21	23	89.52	89.3	8.85	11.25	7	11	9	10	24.14	30.36	15.89	18.8	21.59	21.7	15.22	36.32	18	19	27.94	17.42	21.24	27.66	0	0
Pfund	12	9	12	11	38	41.56	52.83	76.55	34.26	31.64	33.28	27.09	21	23	39.52	64.17	32.39	32.15	8	10	9	10	15.25	-2	8.33	11.5	15.87	12.01	17.06	21.57	18	19	5.67	10	16.06	19.1	0	0
Pfütze	10	10	12	11	81.8	87.7	82.67	89.36	16.29	13.42	27.21	18.82	20	23	84.75	85.87	14.84	23.3	10	8	9	10	-4.1	-2.63	-12.44	-21.9	20.94	45.03	14.71	16.91	18	19	-3.44	-17.42	32.68	16.21	0	0
Phantasie	10	8	13	10	28.2	15.75	32.15	43.6	29.78	15.28	31.37	37.88	18	23	22.67	37.13	24.62	34.02	9	10	9	11	55	62.3	37.56	42.73	28.86	36.19	25.48	34.53	19	20	58.84	40.4	32.24	30.13	0	0
Pharao	12	9	11	12	83.83	74.78	84.27	68.58	15.02	25.61	21.23	24.95	21	23	79.95	76.09	20.19	24.09	9	9	9	10	23.44	25.67	-1.33	8.4	27.84	40.05	22.89	12.81	18	19	24.56	3.79	33.48	18.43	0	0
Phase	9	9	13	10	32.44	16.89	34.08	30.8	38.86	18.13	32.82	34.04	18	23	24.67	32.65	30.48	32.62	9	9	10	9	-11.33	14	2.3	11.78	24.66	35.19	5.64	10.57	18	19	1.33	6.79	32.23	9.44	0	0
Philosoph	11	9	13	10	41.73	29.89	46.77	61	27.98	21.12	37.66	34.4	20	23	36.4	52.96	25.22	36.19	10	9	11	9	28.6	34.78	26.82	36.89	43.89	26.67	31.56	27.54	19	20	31.53	31.35	35.91	29.5	0	0
Phrase	11	9	10	12	12.27	25.11	32.7	34.17	10.74	24.63	26.96	30.5	20	22	18.05	33.5	18.95	28.27	9	8	11	8	-28.22	-5.63	-30.09	-37	26.45	20.93	28.42	39.5	17	19	-17.59	-33	26.01	32.68	.04	0
Physiker	9	10	11	11	49.56	36.9	59.27	71	19.83	23.8	35.61	27.58	19	22	42.89	65.14	22.37	31.66	9	9	8	11	2.89	18.22	31.25	28.73	28.68	25.51	24.75	27.64	18	19	10.56	29.79	27.49	25.78	0	0
Pianist	10	10	10	13	75.7	71.7	85.5	86.69	18.96	29.48	14.47	17.75	20	23	73.7	86.17	24.21	16.06	10	10	10	10	35.1	43.3	38.5	46.1	25.43	37.12	29.36	17.1	20	20	39.2	42.3	31.25	23.71	0	0
Pickel	11	8	12	11	75.18	92.38	77.92	88.09	24.22	6.57	26.72	14.46	19	23	82.42	82.78	20.46	21.89	9	9	9	11	-39.67	-61.67	-41.56	-51.55	19.63	24.44	27.3	30.45	18	20	-50.67	-47.05	24.3	28.77	0	0
Pille	10	10	12	11	81.2	96.2	92.67	87.18	17.72	4.13	13.9	12.62	20	23	88.7	90.04	14.7	13.3	10	8	10	10	-6.3	-4.38	-17.2	7.6	27.47	31.33	35.16	26.13	18	20	-5.44	-4.8	28.37	32.72	0	0
Pilot	12	8	13	10	74.83	67.63	84.69	89.1	19.39	15.72	20.95	11.07	20	23	71.95	86.61	17.94	17.16	9	10	10	10	25.11	26.3	46.9	37.4	31.47	30.81	22.47	20.18	19	20	25.74	42.15	30.25	21.35	0	0
Pilz	11	10	13	10	89.27	97.4	96.54	89.6	8.31	3.78	4.72	15.64	21	23	93.14	93.52	7.63	11.16	10	8	10	9	12.8	15.63	36.3	27.56	43.1	31.81	33.11	32.11	18	19	14.06	32.16	37.45	32.04	0	0
Pinguin	10	9	12	11	91.3	96.89	93.58	90.27	12.21	4.78	14.17	11.06	19	23	93.95	92	9.64	12.61	8	11	11	8	43	50.82	59.36	47.25	31.9	30.98	27.24	27.37	19	19	47.53	54.26	30.73	27.23	0	0
Pinie	10	10	11	10	65.5	83.4	89.55	79.9	26.61	14.4	15.24	30.78	20	21	74.45	84.95	22.76	23.81	8	10	9	10	39.63	35.5	39.22	37.3	22.9	31.02	26.31	20.41	18	19	37.33	38.21	27.02	22.74	0	.04
Pinnwand	10	10	11	11	81.7	93.5	94.64	79.18	20.04	7.06	8	22.18	20	22	87.6	86.91	15.83	18.09	9	9	8	11	10.78	9	8.75	27.18	19.43	12.7	14.38	16.84	18	19	9.89	19.42	15.95	18.04	0	0
Pinsel	9	12	12	10	89.22	92.25	95.08	87.7	13.9	11.01	8.36	17.77	21	22	90.95	91.73	12.09	13.64	9	9	9	10	13.56	30.22	16.44	2.5	23.59	31.62	15.68	19.76	18	19	21.89	9.11	28.39	18.86	0	0
Pinzette	10	11	13	10	94.8	95.45	90.38	69.3	5.27	5.05	17.67	29.64	21	23	95.14	81.22	5.03	25.37	10	8	10	9	-2.3	-2.13	13.6	.44	13.69	10.63	22.53	43.52	18	19	-2.22	7.37	12.07	33.78	0	0
Pionier	11	7	14	9	57.45	41.43	65.5	66.56	39.57	29.03	27.95	29.92	18	23	51.22	65.91	35.82	28.06	8	10	7	12	17	6.4	9.57	25.33	26.72	23.35	43.37	25.39	18	19	11.11	19.53	24.74	32.89	0	0
Pirat	12	8	12	11	84.42	81.88	69.67	71.09	14.96	25.54	29.86	25.53	20	23	83.4	70.35	19.27	27.25	9	9	9	10	-1.78	-.22	-40.67	-32.9	53.95	29.96	36.68	47.32	18	19	-1	-36.58	42.34	41.64	0	0
Pistole	11	9	14	9	92.64	95.67	95.86	86.44	9.21	3.57	5.52	25.04	20	23	94	92.17	7.24	16.37	9	9	9	11	-42.89	-43	-65.78	-76.55	30.44	45.96	42.13	19.71	18	20	-42.94	-71.7	37.82	31.34	0	0
Plakat	10	10	11	12	74.1	81.8	84.82	88.17	17.18	18.2	16.56	11.07	20	23	77.95	86.57	17.67	13.74	9	10	10	9	19.44	26.2	7.7	16	34.22	38.02	12.2	12.11	19	19	23	11.63	35.43	12.56	0	0
Plan	10	11	13	10	58	52	70.08	51.4	24.89	29.77	23.78	30.5	21	23	54.86	61.96	27.04	27.9	10	9	8	11	24	26.89	12.5	28.45	23.37	33.69	20.31	28.1	19	19	25.37	21.74	27.92	25.78	0	0
Plane	9	12	13	10	64	73	83.15	81.3	31.02	21.64	17.46	23.2	21	23	69.14	82.35	25.76	19.68	10	8	9	10	2.2	1.88	17.56	8.3	20.31	14.4	14.47	13.36	18	19	2.06	12.68	17.43	14.31	0	0
Planet	12	7	11	11	83.42	73	89.36	83.27	16.77	28.7	14.77	20.49	19	22	79.58	86.32	21.75	17.7	9	10	10	9	38	39.9	31.4	32.89	48.62	34.02	37.08	24.19	19	19	39	32.11	40.38	30.79	0	0
Plastik	10	10	12	11	63.6	74.2	65.42	71.09	30.3	19.71	22.48	32.93	20	23	68.9	68.13	25.46	27.46	10	8	10	9	-14.8	-11.5	1	20.22	21.88	15.93	30.87	39.5	18	19	-13.33	10.11	19	35.59	0	0
Platte	9	12	11	12	71.67	84.42	83	79.83	27	17.36	23.31	25.81	21	23	78.95	81.35	22.34	24.14	9	9	10	9	39.44	7.78	3.1	6.44	34.84	15.71	26.24	37.7	18	19	23.61	4.68	30.87	31.29	0	0
Platz	9	10	11	12	62.56	61.5	76.64	70.08	22.54	24.78	22.23	29.57	19	23	62	73.22	23.09	25.94	10	8	10	9	15.6	8.63	11.9	28.67	18.79	19.08	19.76	20.35	18	19	12.5	19.84	18.7	21.29	0	0
Plombe	11	9	11	12	70	73.56	75.64	87.17	31.23	15.91	28.87	10.05	20	23	71.6	81.65	24.96	21.54	10	9	8	11	-39.6	-40.67	-9.25	-9.64	25.98	25.06	35.13	37.98	19	19	-40.11	-9.47	24.84	35.79	0	0
Plüsch	10	9	12	11	49.5	66.89	78	85.09	28.37	21.15	31.44	15.62	19	23	57.74	81.39	26.09	24.87	9	9	9	10	21	36.44	16.56	19	37.39	36.33	21.81	32.71	18	19	28.72	17.84	36.64	27.35	0	0
Pluto	10	10	12	11	83.6	48.9	44.83	55.64	11.38	18.99	34.68	35.05	20	23	66.25	50	23.43	34.5	9	9	9	10	29.11	21.56	-8	14.3	32.45	31.05	46.27	27.1	18	19	25.33	3.74	31.05	38.08	0	0
Podest	10	10	14	9	67.5	79.3	77.5	92.56	33.28	17.38	27.7	8.92	20	23	73.4	83.39	26.54	23.21	9	9	9	10	8.22	12.11	.67	26.6	16.4	19.27	18.7	25.24	18	19	10.17	14.32	17.47	25.51	0	0
Pokal	12	9	12	11	83.92	92.67	84.92	79.55	25.44	6.28	17.89	23.85	21	23	87.67	82.35	19.78	20.64	11	8	11	8	19.91	22.75	29.09	38	29.61	25.72	27.71	30.24	19	19	21.11	32.84	27.32	28.33	0	0
Pol	11	10	14	8	64.91	50.1	68.57	66.25	32.88	29.95	31.22	34.82	21	22	57.86	67.73	31.65	31.76	11	8	9	10	24.36	8.13	3.56	13.5	41.76	23.97	16.01	33.76	19	19	17.53	8.79	35.5	26.64	0	0
Politik	11	9	13	10	31.82	16.22	45.46	51.4	22.91	16.17	34.91	34.08	20	23	24.8	48.04	21.2	33.9	11	8	9	10	-20	-4.5	-4.78	-10.9	44.62	63.35	25.95	44.35	19	19	-13.47	-8	52.23	35.95	0	0
Polizei	11	10	12	10	79.64	79	96.08	88	23.04	19.15	4.96	14.91	21	22	79.33	92.41	20.75	11.19	10	8	7	12	-10.8	-26.25	2.86	10.58	45.14	30.29	57.89	52.97	18	19	-17.67	7.74	38.97	53.35	0	0
Polizist	10	10	12	10	82.5	80	91.42	91.3	17.82	18.95	7.43	7.15	20	22	81.25	91.36	17.95	7.13	9	9	8	11	-14.11	-5.89	-.75	14.73	37.78	39.37	43.31	26.48	18	19	-10	8.21	37.67	34.36	0	0
Polohemd	9	11	12	10	78.67	85.09	82.58	91	15.91	18.3	23.45	7.75	20	22	82.2	86.41	17.13	18.23	10	8	11	8	-18.2	19.63	34.73	17.25	32.69	48.25	23.15	24.28	18	19	-1.39	27.37	43.57	24.61	0	0
Polster	12	9	12	11	62.75	72.67	83.67	77.91	25.36	18.57	23.66	26.71	21	23	67	80.91	22.74	24.76	9	9	9	10	25.89	23.78	31.33	36.3	26.28	23.99	17.11	34.44	18	19	24.83	33.95	24.44	27.01	0	0
Pomade	11	9	12	11	53	69.89	66.42	77.09	31.3	17.2	36.07	29.13	20	23	60.6	71.52	26.73	32.65	9	8	10	9	-14.56	-20.5	-12.7	-22	26.23	29.7	21.92	32.87	17	19	-17.35	-17.11	27.19	27.26	.07	0
Pony	8	12	11	12	86.38	91.25	97.18	89.17	16.53	10.52	4.47	14.35	20	23	89.3	93	13.06	11.35	10	9	9	10	25.4	40.11	58	46.5	24.02	35.44	21.59	28.33	19	19	32.37	51.95	30.06	25.36	0	0
Portion	10	10	10	12	57.5	61.1	49.1	66	26.22	26.76	27.02	28.13	20	22	59.3	58.32	25.85	28.31	9	10	10	9	-1.22	6.2	13.9	23.11	20.43	10.86	20.77	22.84	19	19	2.68	18.26	16.09	21.67	0	0
Portrait	10	11	12	11	76.3	67.55	82.58	88.09	25.42	19.78	22.84	11.86	21	23	71.71	85.22	22.51	18.24	8	10	10	9	21.25	44.7	15.9	31.11	26.6	37.36	18.48	33.79	18	19	34.28	23.11	34.27	27.19	0	0
Porzellan	11	8	12	11	70.91	73.25	86.67	89.27	22.3	19.91	18.13	8.58	19	23	71.89	87.91	20.78	14.13	8	10	10	9	23.38	19.9	48.5	59.89	20.16	18.28	28.14	31	18	19	21.44	53.89	18.64	29.27	0	0
Posaune	10	9	13	10	88.1	82.78	94.08	89.9	14.46	16.15	8.51	12.98	19	23	85.58	92.26	15.1	10.63	9	9	9	10	26.56	22.11	38.11	20.1	31.2	34.71	32.48	25.35	18	19	24.33	28.63	32.1	29.59	0	0
Post	10	9	12	11	75.1	85.11	89	81.18	17.38	14.23	14.97	26.59	19	23	79.84	85.26	16.35	21.2	10	9	9	10	11.3	33.11	38.89	33.5	40.21	48.15	34.37	30.07	19	19	21.63	36.05	44.32	31.38	0	0
Postfach	11	8	12	11	55.73	53.63	71.58	87.55	31.11	30.56	31.79	13.68	19	23	54.84	79.22	30.03	25.63	9	9	9	10	-4	3.22	10.33	15.4	11.98	14.86	13.4	18.97	18	19	-.39	13	13.61	16.33	0	0
Postkarte	10	10	12	11	86.8	85.7	93.75	89.18	12.18	17.61	11.09	12.98	20	23	86.25	91.57	14.75	11.98	10	9	9	10	30.9	48	33.78	29.4	25.42	28.71	26.2	26.03	19	19	39	31.47	27.68	25.48	0	0
Pracht	11	10	10	12	50.82	34.5	55.3	50	23.74	27.5	18.32	38.18	21	22	43.05	52.41	26.31	30.25	7	11	9	10	31.43	49.45	38.78	28.7	29.09	25.99	34.36	37.65	18	19	42.44	33.47	27.89	35.5	0	.03
Prädikat	11	10	12	11	38.09	10.9	33.92	32.27	33.37	11.32	28.44	24.1	21	23	25.14	33.13	28.43	25.87	8	10	8	11	9	-3.2	28	26	32.49	12.83	31.35	34.63	18	19	2.22	26.84	23.68	32.4	0	0
Praline	10	11	11	12	87.3	88.73	91.91	90.67	13.74	11.86	9.45	9.4	21	23	88.05	91.26	12.48	9.23	8	10	9	10	1.88	29.2	60.67	56.8	26.63	43.7	32.12	23.79	18	19	17.06	58.63	38.71	27.3	0	0
Pranke	10	11	11	11	71.3	75.73	93	81.18	24.71	19.26	8.39	19.42	21	22	73.62	87.09	21.57	15.8	8	11	9	10	-9.88	-4.36	-19.78	-15.8	28.41	29.27	38.3	28.89	19	19	-6.68	-17.68	28.24	32.76	0	0
Präsident	12	7	13	10	59.75	52.14	76.38	74.7	32.23	21.71	25.47	20.17	19	23	56.95	75.65	28.39	22.82	10	9	11	8	-5.2	-26.44	16	12.13	46.97	26.75	28.02	31.76	19	19	-15.26	14.37	39.24	28.85	0	0
Praxis	11	8	11	12	46.64	56.25	50.73	61.58	30.14	31.34	34.75	34.48	19	23	50.68	56.39	30.18	34.26	7	11	8	11	10	-4	14.25	17.36	34.2	23.44	24.18	29.39	18	19	1.44	16.05	28.02	26.64	0	0
Predigt	10	9	12	11	52.3	53.11	44.92	54.82	34.33	33.25	35.41	39.33	19	23	52.68	49.65	32.87	36.82	9	8	10	9	-26.67	-22.25	23.8	2.44	41.46	44.61	37.42	53.2	17	19	-24.59	13.68	41.66	45.58	.04	0
Preis	10	10	11	11	43.5	43.6	52.27	57.64	24.11	32.29	33.65	35.58	20	22	43.55	54.95	27.74	33.91	8	10	9	10	-.75	9.6	5.11	20.7	39.43	33.58	8.1	28.28	18	19	5	13.32	35.57	22.2	0	0
Presse	9	10	11	12	61.67	55.1	65.27	69	31.64	30.41	24.49	28.71	19	23	58.21	67.22	30.31	26.24	8	10	9	10	2	18.8	-7	24.5	42.23	28.84	27.31	42.89	18	19	11.33	9.58	35.33	38.89	0	0
Prestige	12	10	12	11	30.75	16.7	25.5	22.36	23.46	12.69	25.99	27.67	22	23	24.36	24	20.21	26.24	10	7	10	10	2.2	2.14	17.1	13.2	35.14	41.35	43.86	16.65	17	20	2.18	15.15	36.55	32.35	.03	0
Priester	11	11	12	11	63.91	71.36	81.33	70.64	27.49	19.32	16.14	33.12	22	23	67.64	76.22	23.5	25.66	11	7	9	10	-9.18	11.43	33.33	6.4	44.17	26.49	36.14	34.67	18	19	-1.17	19.16	38.76	37.05	0	0
Prinz	12	9	13	10	70.33	72.89	76.92	74.7	20.11	18.97	24.03	24.09	21	23	71.43	75.96	19.19	23.53	8	10	8	11	22.13	31.2	9	10.09	25.48	33.85	16.35	34.39	18	19	27.17	9.63	29.92	27.59	0	0
Prinzessin	11	8	12	10	81.82	77.63	72.33	71.8	14.96	24.82	28.82	30.93	19	22	80.05	72.09	19.19	29.07	9	9	10	9	42.89	38.78	26	14	41.52	42.6	31.29	31.15	18	19	40.83	20.32	40.86	30.96	0	0
Prinzip	9	11	13	10	19.44	17.55	30.15	43.5	24.43	27.19	31.83	34.16	20	23	18.4	35.96	25.33	32.8	8	10	8	11	-.63	11.6	15	28.09	19.79	29.85	28.96	34.43	18	19	6.17	22.58	25.93	32.08	0	0
Pritsche	11	9	12	11	72.82	73.78	86.83	81.36	30.39	20.41	12.94	28.73	20	23	73.25	84.22	25.73	21.6	10	9	9	10	-29.3	-30.56	-10.56	-4.5	30.02	41.71	26.62	25.76	19	19	-29.89	-7.37	34.99	25.62	0	0
Problem	10	11	13	10	26.8	12	33.69	27.2	28.05	14.75	30.96	29.15	21	23	19.05	30.87	22.81	29.68	13	13	12	13	-25.08	-54.15	-40.92	-20.46	24.45	37.91	48.78	48.01	26	25	-39.62	-30.28	34.59	48.5	0	0
Professor	9	11	13	10	62.44	51.36	62.46	76.6	23.71	21.38	34.89	24.65	20	23	56.35	68.61	22.57	31.05	9	9	10	9	14.33	19.67	33.6	44.89	45.6	28.5	24.82	25.64	18	19	17	38.95	36.99	25.18	0	0
Profil	12	9	13	10	47.33	50.11	56.23	64.8	35.59	25.99	33.89	33.11	21	23	48.52	59.96	31.13	33.07	11	7	8	11	10.91	-1.71	17	18.64	28.44	23.46	24.16	21.29	18	19	6	17.95	26.65	21.89	0	0
Profit	11	9	13	10	39.27	25.33	39	40.2	27.21	18.51	26.69	26.01	20	23	33	39.52	24.18	25.8	8	11	8	11	-13.25	-8.64	18.88	-15	56.11	32.02	57.52	43.52	19	19	-10.58	-.74	42.42	51.32	0	0
Programm	9	11	12	10	42	32.73	47.5	48.3	35.64	28.77	19.28	28.05	20	22	36.9	47.86	31.51	23.07	9	9	9	10	4.44	10	17.78	21.6	38.23	12.85	18.77	22	18	19	7.22	19.79	27.81	20.06	0	0
Projekt	10	11	12	11	27.8	14.73	45.92	49.27	25.83	17.95	26.98	33.7	21	23	20.95	47.52	22.5	29.72	9	9	8	11	21.44	31.89	8.25	7.73	30.05	33.77	15.84	18.87	18	19	26.67	7.95	31.47	17.19	0	0
Prophet	12	9	11	11	43	61.22	41.73	43.27	27.69	23.95	31.11	35.27	21	22	50.81	42.5	27.14	32.47	9	9	9	10	-19.78	6.56	7.33	14.4	38.25	20.05	41.03	19.37	18	19	-6.61	11.05	32.58	30.81	0	0
Prothese	10	10	12	11	80	76.3	80.08	82.73	18.82	15	24.74	16.61	20	23	78.15	81.35	16.67	20.81	11	8	9	10	-49.27	-37.5	-49.56	-37.6	14.78	24.18	30.46	45.56	19	19	-44.32	-43.26	19.61	38.57	0	0
Protokoll	12	10	13	10	47.5	56.7	59.08	68.8	24.72	24.26	29.43	24.84	22	23	51.68	63.3	24.38	27.37	10	8	8	11	-24.6	-8.38	5.88	8.27	14.85	9.35	36.49	16.04	18	19	-17.39	7.26	14.88	25.74	0	0
Prozent	10	10	11	11	52.5	33.7	51.91	53.27	33.56	28.1	39.57	32.48	20	22	43.1	52.59	31.63	35.33	9	9	8	11	7.78	-4.78	8.63	6.27	24.62	23.57	18.28	28.27	18	19	1.5	7.26	24.25	23.99	0	0
Prozess	11	9	11	12	37.27	25.11	47.55	57.58	30.25	25.71	35.22	34.44	20	23	31.8	52.78	28.26	34.4	10	9	9	10	-35.6	-5.33	-32.11	-33.2	42.27	52.36	40.97	28.11	19	19	-21.26	-32.68	48.51	33.78	0	0
Prüfung	10	10	11	11	45	43.4	48.82	56.82	34.87	27.26	25.02	38.45	20	22	44.2	52.82	30.47	31.92	10	8	9	10	-35	-41.38	-6.11	-22.2	41.68	34.53	46.4	47.83	18	19	-37.83	-14.58	37.7	46.57	0	0
Pudding	10	9	13	10	79.7	89.56	91.77	91.3	13.24	11.01	13.11	13.7	19	23	84.37	91.57	12.93	13.06	9	9	9	10	14.44	61.56	48.67	42.9	33.69	23.38	26.44	38.8	18	19	38	45.63	37.14	32.74	0	0
Pudel	9	10	13	10	89.56	91.9	94.69	89.5	13.81	10.08	8.8	12.08	19	23	90.79	92.43	11.71	10.43	10	9	10	9	-16.1	5.11	29.5	39.78	37.42	31.21	33.25	38.11	19	19	-6.05	34.37	35.38	35.02	0	0
Puder	10	10	13	9	64.3	79.9	74.46	83.56	33.1	26.88	28.66	26.73	20	22	72.1	78.18	30.42	27.61	10	8	10	9	3.7	22.75	7	9.78	13.67	25.76	13.69	10.8	18	19	12.17	8.32	21.61	12.15	0	0
Pullover	9	10	12	10	81.44	89.2	95.75	90.9	15.21	9.95	6.96	12.03	19	22	85.53	93.55	12.97	9.67	8	11	8	11	43.63	35.82	37.25	51.09	26.77	32.7	18.45	25.12	19	19	39.11	45.26	29.8	23.07	0	0
Pult	9	12	12	10	73.22	90.5	85.75	78.7	23.73	11.97	24.26	24.32	21	22	83.1	82.55	19.51	23.97	9	9	9	10	-3.78	7.78	2.89	13.9	13.43	20.1	37.31	15.15	18	19	2	8.68	17.62	27.67	0	0
Pulver	11	9	12	11	59.64	86.44	69.33	70.18	31.47	10.94	30.65	29.66	20	23	71.7	69.74	27.55	29.49	10	8	10	9	-3.6	-2.88	-11.5	9.22	19.45	13.22	28.44	19.6	18	19	-3.28	-1.68	16.5	26.23	0	0
Puma	9	10	12	11	87.89	82	94.42	80.91	15.37	18.81	8.69	19.43	19	23	84.79	87.96	17.06	16.03	10	8	8	11	22.2	30.5	-6.75	-.45	17.38	28.12	60.3	40.7	18	19	25.89	-3.11	22.44	48.42	0	0
Pumpe	10	10	12	11	76.7	78.1	92	84.55	16.85	15.69	8.88	19.06	20	23	77.4	88.43	15.86	14.8	12	8	9	10	10.92	-.5	21.78	19.4	25.3	10.45	24.57	21.11	20	19	6.35	20.53	21.06	22.19	0	0
Punkt	8	11	13	10	91.63	90.73	88.08	84.6	14.18	15.67	19.55	29.47	19	23	91.11	86.57	14.66	23.81	10	8	10	10	5.8	7.88	9.9	12.6	11.95	12.37	16.52	19.06	18	20	6.72	11.25	11.82	17.41	0	0
Pupille	11	10	12	11	86.18	85.6	92.17	90.73	11.34	13.57	9.61	12.91	21	23	85.9	91.48	12.14	11.07	9	9	10	9	14.78	4	26.9	29.44	28.09	5.5	28.92	22.46	18	19	9.39	28.11	20.41	25.38	0	0
Puppe	10	11	11	11	84.6	91.64	90.27	90.64	14.6	5.66	16.01	10.92	21	22	88.29	90.45	11.18	13.37	8	10	10	9	10	19.5	43.4	39.67	17.2	33.76	26.66	31.99	18	19	15.28	41.63	27.37	28.53	0	0
Püree	11	9	13	10	81.91	84.11	84.38	77.9	20.44	15.31	19.75	25.79	20	23	82.9	81.57	17.89	22.26	9	9	9	10	28.89	25.78	32.89	24.2	24.39	16.48	34.43	24.8	18	19	27.33	28.32	20.26	29.23	0	0
Purzelbaum	11	9	13	10	67.64	80.33	78.08	78.4	21.56	12.57	24.71	17.56	20	23	73.35	78.22	18.79	21.43	8	10	10	9	32.88	28.8	28.7	27.78	23.28	32.3	23.86	29.97	18	19	30.61	28.26	27.93	26.16	0	0
Puzzle	12	8	14	8	83.58	90.63	91.07	91.25	12.74	8.85	11.82	10.75	20	22	86.4	91.14	11.63	11.18	8	10	11	8	16.88	40.7	24.27	46	20.57	30.25	26	33.31	18	19	30.11	33.42	28.41	30.47	0	0
Quader	12	9	13	10	77.42	74.11	80	64.6	21.63	19.62	21.27	30.4	21	23	76	73.3	20.35	26.19	10	8	10	9	-6.1	2.88	-3.7	10.22	17.67	21.48	26.46	23.17	18	19	-2.11	2.89	19.4	25.29	0	0
Quadrat	11	9	12	11	88.18	94.56	96	86.64	15.32	5.29	6.48	14.24	20	23	91.05	91.52	12.08	11.66	11	8	8	11	7.18	-4.13	16.13	16.73	12.2	11.62	31	28	19	19	2.42	16.47	12.96	28.45	0	0
Qualität	11	10	13	10	27	17.6	37	39.8	26.73	19.05	34.54	35.93	21	23	22.52	38.22	23.32	34.36	10	9	8	11	28.9	31.44	47.5	59.82	47.31	30.91	32.56	23.59	19	19	30.11	54.63	39.31	27.58	0	0
Qualle	11	9	11	11	90.55	92.33	87.45	88.64	8.1	7.76	18.1	18.15	20	22	91.35	88.05	7.8	17.7	9	9	9	10	-28.78	-15.78	-33.11	-45.5	40.38	40.58	42.26	37.39	18	19	-22.28	-39.63	39.84	39.16	0	0
Qualm	12	10	12	11	76.5	88.3	81.42	81.36	29.19	12.46	20.65	23.21	22	23	81.86	81.39	23.43	21.4	8	10	10	10	-43.13	-49.3	-57.1	-51.4	22.11	30.91	25.53	26.17	18	20	-46.56	-54.25	26.78	25.33	0	0
Quark	8	11	11	12	65.25	86.18	91	89.5	30.05	15.68	12.53	9.67	19	23	77.37	90.22	24.51	10.9	9	9	10	9	26.22	23.78	44.6	50.67	25.73	26.32	24.72	24.29	18	19	25	47.47	25.28	24.03	0	0
Quarz	11	9	11	11	51.45	54.56	64.09	58.36	32.37	30.48	27.41	34.88	20	22	52.85	61.23	30.74	30.75	12	7	8	11	3.42	.71	10.63	19.09	31.02	9.72	18.11	25.15	19	19	2.42	15.53	24.93	22.3	0	0
Quaste	8	10	10	13	57.25	74.3	79.9	66.77	30.76	19.57	22.25	24.83	18	23	66.72	72.48	25.85	24.15	5	9	9	10	9.6	.44	9.67	17.5	37.03	6.29	13.97	31.47	14	19	3.71	13.79	21.61	24.46	.21	0
Quelle	10	10	13	10	78.4	72.5	87.08	82	27.11	25.63	14.92	20.08	20	23	75.45	84.87	25.85	17.12	8	10	8	11	48.75	43.7	61.13	43	30.93	30.8	29.47	14.39	18	19	45.94	50.63	30.05	23.18	0	0
Quitte	9	10	13	10	54.89	84.5	87.54	87.6	31.28	15.87	13.42	12.17	19	23	70.47	87.57	28.14	12.6	6	11	8	11	16.5	22	19.63	21	13.31	27	20.16	22.24	17	19	20.06	20.42	22.76	20.82	.04	0
Quittung	9	10	13	10	66	72.7	71.38	82.7	26.43	22.1	26.31	21.17	19	23	69.53	76.3	23.8	24.37	12	7	9	10	-20.42	-7.29	14.89	8.9	38.78	27.69	33.59	23.13	19	19	-15.58	11.74	34.88	27.9	0	0
Rabe	9	12	12	11	89.56	90.08	93.25	91.55	11.22	10.8	9.38	7.66	21	23	89.86	92.43	10.7	8.45	12	7	10	9	.17	15.57	30.4	17.44	38.21	9.83	51.06	32.32	19	19	5.84	24.26	31.35	42.57	0	0
Rad	9	11	12	11	94.11	97.27	98.58	90.73	5.82	3.69	3.09	7.77	20	23	95.85	94.83	4.9	6.95	11	8	9	10	34.91	29.75	37.78	39.5	33.18	31.89	24.16	29.49	19	19	32.74	38.68	31.84	26.36	0	0
Radieschen	11	9	12	11	86.91	92.44	96.92	91	16.15	10.11	4.32	12.65	20	23	89.4	94.09	13.72	9.55	9	9	8	11	21	22.67	40.88	43.18	12.64	22.68	29.06	29.92	18	19	21.83	42.21	17.83	28.76	0	0
Radio	11	10	13	10	88	91.4	91.31	95	10.42	13.03	24.03	5.89	21	23	89.62	92.91	11.56	18.24	11	8	7	12	27.82	21.25	25	57.67	28.44	37.27	32.38	21.2	19	19	25.05	45.63	31.63	29.77	0	0
Rahmen	11	9	13	10	66.36	83.22	85.92	80.5	28.18	12.6	16.58	21.47	20	23	73.95	83.57	23.64	18.6	8	10	8	11	1.75	.4	17.63	10.82	17.67	5.27	30.53	16.81	18	19	1	13.68	11.99	23.05	0	0
Rakete	11	10	14	9	91.82	88	91.21	83.11	10.53	13.98	11.98	14.87	21	23	90	88.04	12.14	13.47	9	9	11	8	22.44	-13.78	-53.55	-26.13	37.28	41.7	38.33	45.01	18	19	4.33	-42	42.66	42.39	0	0
Ranzen	11	10	13	10	75.45	80.4	89.62	85.8	17.88	17.01	13.17	19.48	21	23	77.81	87.96	17.22	15.92	8	10	9	10	10.5	3.5	16.67	18.5	22.45	13.69	46.92	30.51	18	19	6.61	17.63	17.88	38.01	0	0
Rasen	12	9	11	12	79.08	88.78	95.64	86.67	19.18	10.63	5.92	17.56	21	23	83.24	90.96	16.48	13.82	10	9	11	8	30.1	3.33	46	35.88	23.94	39.87	25.66	24	19	19	17.42	41.74	34.37	24.82	0	0
Rasierer	11	9	13	9	81.91	84.89	87.62	81.22	15.31	17.67	21.59	27.23	20	22	83.25	85	16.04	23.65	9	10	9	10	4.44	-.8	27.33	9.1	18.79	15.81	32	23.89	19	19	1.68	17.74	17	28.77	0	0
Raspel	10	10	11	12	61.6	76.1	87.36	74.92	23.51	22.82	12.81	27.71	20	23	68.85	80.87	23.74	22.33	10	8	10	9	-2.2	7.88	8.1	.89	12.01	17.46	18.53	27.65	18	19	2.28	4.68	15.11	22.92	.04	0
Rassel	11	9	12	11	82.18	79.44	70.33	64.91	16.79	16.9	34.67	32.82	20	23	80.95	67.74	16.45	33.14	9	9	9	10	3.67	29.33	-2.22	-2.6	12.59	37.23	28.15	39.76	18	19	16.5	-2.42	30.02	33.8	0	0
Rat	10	9	12	11	27.7	18.67	26.42	37	30.7	20.33	25.2	36.58	19	23	23.42	31.48	26.01	30.91	10	9	11	8	23.5	37.33	40.09	45.13	30.75	31.79	27.4	31.05	19	19	30.05	42.21	31.18	28.26	.03	0
Rate	11	9	11	12	22.27	30.56	41.73	35.92	29.69	33.42	31.89	34.58	20	23	26	38.7	30.86	32.7	10	8	8	11	-21.8	-42	-22.13	-7.27	15.96	30.79	34.24	13.94	18	19	-30.78	-13.53	25.14	24.92	0	0
Rathaus	9	12	13	9	69	79.5	86.08	82.56	29.64	17.86	16.81	23.27	21	22	75	84.64	23.56	19.26	9	9	10	9	-1.89	7.44	9	26.67	35.96	23.04	24.68	27.92	18	19	2.78	17.37	29.69	27.08	0	0
Rätsel	8	11	12	11	52.13	35.45	67.42	83.36	29.52	22.86	31.47	17.54	19	23	42.47	75.04	26.47	26.48	10	9	7	12	17.6	34.33	.57	34.75	42.62	33.42	28.18	28.22	19	19	25.53	22.16	38.45	32.22	0	0
Ratte	10	11	13	10	89	92.91	96	85.4	14.13	12.09	6.73	20.21	21	23	91.05	91.39	12.92	14.86	9	9	9	10	-27.22	-26.33	-48.78	-66.3	36.87	35.9	39.45	28.34	18	19	-26.78	-58	35.31	34.27	0	0
Raub	10	10	12	11	53.3	44.1	55.42	61.09	30.16	23.56	28.11	33.1	20	23	48.7	58.13	26.76	30.03	9	9	10	9	-52.78	-55	-83.1	-83.89	27.46	30.88	21.82	17.45	18	19	-53.89	-83.47	28.37	19.33	0	0
Räuber	11	9	12	11	68	75.22	81.67	58.18	28.57	9.5	17.49	33.93	20	23	71.25	70.43	21.94	28.64	10	8	10	9	-34.6	-42.13	-80.3	-80.89	53.09	38.72	23.91	17.69	18	19	-37.94	-80.58	46.09	20.62	0	0
Raubtier	11	10	11	11	80.55	67.4	86	85	21.81	18.25	22.87	13.62	21	22	74.29	85.5	20.81	18.37	8	10	10	9	9.13	3.1	-40.3	-18.44	29.96	61.48	50.1	44.17	18	19	5.78	-29.95	48.79	47.41	0	0
Rauch	10	9	13	9	89.4	90.11	88.46	69.44	9.12	8.92	13.41	30.25	19	22	89.74	80.68	8.78	23.3	9	9	9	10	-38.11	-38.78	-35.56	-35.6	31.6	24.16	29.25	26.53	18	19	-38.44	-35.58	27.29	27.06	0	0
Raum	11	9	11	11	70.91	74.89	79.82	82.18	20.74	17.88	28.07	23.76	20	22	72.7	81	19.11	25.41	7	12	10	9	5.43	19.25	18	20	13.26	22.56	23.99	15.15	19	19	14.16	18.95	20.41	19.77	0	0
Raumschiff	9	9	12	11	83	84.67	83	77.27	18.21	17.11	19	24.02	18	23	83.83	80.26	17.16	21.24	9	9	9	10	42	20.67	4.33	31.5	39.69	34.06	29.32	31.27	18	19	31.33	18.63	37.52	32.64	0	0
Raupe	11	9	12	11	90.64	94.78	94.67	85.73	7.13	10.08	8.96	22.66	20	23	92.5	90.39	8.61	17.16	7	11	9	10	1.43	26.09	-28.78	-30.3	22.26	16.69	35.95	27.41	18	19	16.5	-29.58	22.18	30.84	0	0
Raute	10	10	13	9	73	76	66.15	67.56	28.22	23.51	35.28	34.04	20	22	74.5	66.73	25.33	33.96	10	8	10	9	6.4	1.38	-.6	26.33	14.62	10.42	23.88	25.05	18	19	4.17	12.16	12.83	27.48	0	.04
Rebhuhn	10	11	11	12	65.5	66.82	87.91	88.08	27.07	19.18	15.74	14.79	21	23	66.19	88	22.68	14.9	10	9	9	11	17.4	5.22	40.33	28	15.7	9.16	39.66	13.91	19	20	11.63	33.55	14.13	28.35	0	0
Rechen	10	10	10	12	76.8	66.8	83.8	83.5	24.48	26.1	25.66	17.23	20	22	71.8	83.64	25.16	20.92	10	8	8	10	1.5	13	15.5	7.7	15.87	28.42	12.78	18.97	18	18	6.61	11.17	22.37	16.55	0	.04
Rechnung	12	10	11	12	66.83	60.3	76.36	69.75	32.14	29.76	24.82	24.61	22	23	63.86	72.91	30.53	24.38	9	9	9	10	-30	-37.78	-32.56	-30.2	42.62	20.11	39.22	30.07	18	19	-33.89	-31.32	32.58	33.72	0	0
Recht	13	8	12	11	34.31	28.88	32.58	41.27	30.6	26.26	24.67	33.75	21	23	32.24	36.74	28.47	29.01	11	7	9	10	4.18	27.57	57.11	41.9	43.09	39.21	29.03	34.91	18	19	13.28	49.11	42.1	32.32	0	0
Rechteck	9	10	11	12	86.89	87.4	98	89.67	16.65	15.34	3	13.53	19	23	87.16	93.65	15.53	10.66	11	8	10	9	-.36	-7.88	7.6	12.89	15.19	13.74	16.52	17.37	19	19	-3.53	10.11	14.7	16.67	0	0
Reck	11	11	13	10	71	78.82	82.69	86.9	24.25	18.72	23.2	15.86	22	23	74.91	84.52	21.52	20.02	9	9	10	10	-13.78	-2	4.8	12.2	22.93	23.63	29.79	33.67	18	20	-7.89	8.5	23.39	31.17	0	0
Redakteur	8	11	11	12	50.13	48.73	59.45	68.67	34.68	24.15	32.65	28.91	19	23	49.32	64.26	28.15	30.41	10	8	10	9	19.3	15.63	12.8	23	20.05	23.46	15.57	25.73	18	19	17.67	17.63	21.05	21.04	0	0
Rede	12	9	13	10	39.08	41.89	40.77	59.1	30.76	25.9	34.85	27.31	21	23	40.29	48.74	28.12	32.46	10	9	8	11	22.2	12	4.88	24.91	25.69	23.51	8.11	24.97	19	19	17.37	16.47	24.55	21.8	0	0
Redner	10	10	12	11	63.5	51.4	72.58	63.82	34.57	26.5	33.08	27.93	20	23	57.45	68.39	30.62	30.36	10	9	11	8	3.5	-3.89	6.73	4.5	16.88	10.89	17.38	13.78	19	19	0	5.79	14.48	15.59	0	0
Reflektor	11	10	10	12	68.27	65.6	68.9	55.5	15.68	25.66	21.69	29.53	21	22	67	61.59	20.52	26.55	10	8	8	11	6.3	11	6.63	14.45	19.24	37.67	20.26	22.65	18	19	8.39	11.16	28.04	21.45	0	.04
Reflex	10	9	11	12	43.7	45.33	38.18	40.25	33.49	30.71	31.15	32.36	19	23	44.47	39.26	31.32	31.08	9	9	9	10	24.11	22	21.11	13.1	26.44	27.09	25.32	11.95	18	19	23.06	16.89	25.99	19.32	0	0
Regal	12	8	11	11	82.92	85.38	93.64	86	19.53	16.15	14.7	23.4	20	22	83.9	89.82	17.85	19.47	11	8	9	11	7.18	6.13	26.44	22.82	10.19	9.88	20.35	21.25	19	20	6.74	24.45	9.79	20.38	0	0
Regel	11	10	11	12	42.82	28.2	38.27	36.83	31.98	27.59	32.1	35.35	21	23	35.86	37.52	30.16	33.07	8	10	8	11	-26.25	-4.5	16.75	14.55	35.17	20.1	22.74	15.93	18	19	-14.17	15.47	29.1	18.53	0	0
Regen	10	9	13	10	76	86.33	91.23	84.1	20.19	10.72	11.45	19.99	19	23	80.89	88.13	16.82	15.75	8	10	9	10	31.88	17.6	1.22	.8	31.2	24.7	35.83	35.64	18	19	23.94	1	27.88	34.72	0	0
Regierung	11	9	13	10	38.45	37.78	56.46	52.9	33.89	26.58	28.92	36.2	20	23	38.15	54.91	30.04	31.55	8	10	8	11	-38.25	-2	-6.13	2.09	41.5	26.44	38.24	18.69	18	19	-18.11	-1.37	37.72	27.93	0	0
Reh	11	9	11	12	86.18	91.11	95.91	88.83	17.2	12.25	7.79	13.74	20	23	88.4	92.22	15.01	11.62	10	9	10	10	45.1	42	71.4	51.9	24.23	34.4	19.72	32.44	19	20	43.63	61.65	28.67	27.98	0	0
Rehkitz	11	9	12	11	86.55	94.56	92.33	82.73	11.53	4.45	8.28	18.57	20	23	90.15	87.74	9.75	14.67	9	10	8	11	39.89	34	66	56.91	26.59	40.8	34.71	32.53	19	19	36.79	60.74	34	32.83	0	0
Reife	11	10	11	13	29.91	14.6	36.36	46.85	28.18	11.13	37.64	36.88	21	24	22.62	42.04	22.67	36.79	9	9	10	9	27.11	24.67	38.5	32.78	29.43	22.74	25.63	43.38	18	19	25.89	35.79	25.55	34.25	0	0
Reifen	11	10	11	13	80.45	92.7	96.64	86.54	19.38	7.33	4.32	13.42	21	24	86.29	91.17	15.85	11.34	10	9	9	10	5.7	9.22	22.67	17.9	34.75	19.19	21.93	20.49	19	19	7.37	20.16	27.76	20.72	0	0
Reihe	10	9	12	11	62.4	61.78	48.25	67.45	21.54	25.82	34.25	33.93	19	23	62.11	57.43	22.98	34.73	9	9	10	9	-3.11	-3	9.3	16.11	32.97	13.79	13.59	20.21	18	19	-3.06	12.53	24.52	16.91	0	0
Reis	10	10	11	12	87.1	86.8	97	93.25	13.61	14.75	3.52	9.14	20	23	86.95	95.04	13.81	7.14	9	9	10	9	29.56	14.56	36.6	39.78	19.31	13.48	30.4	23.66	18	19	22.06	38.11	17.9	26.71	0	0
Reise	11	10	12	11	51.55	30.9	69.17	67.73	27.7	22.1	33.92	26.63	21	23	41.71	68.48	26.74	29.97	10	8	10	9	69.9	66.63	64.9	55.33	24.83	39.13	30.24	24.05	18	19	68.44	60.37	30.98	27.17	0	0
Reisig	11	8	13	10	62.82	65.38	89.69	77.2	29.89	22.85	12.86	27.42	19	23	63.89	84.26	26.48	20.92	8	10	11	8	3.63	6	19.64	11.75	17.8	9.2	21.53	28.32	18	19	4.94	16.32	13.3	24.2	0	0
Reiter	9	11	12	11	77.89	83.18	89.67	84.82	16.85	12.71	21.68	17.9	20	23	80.8	87.35	14.56	19.66	10	8	9	11	16.8	23.13	32.33	33.64	21.94	30.49	16.1	27.07	18	20	19.61	33.05	25.46	22.26	0	0
Reiz	10	9	12	11	35	22.22	25.17	51.45	26.79	19.72	21.12	32.85	19	23	28.95	37.74	23.97	29.9	8	11	10	9	19.25	12.91	14.1	15.78	41.88	28.48	11.57	25.33	19	19	15.58	14.89	33.81	18.78	0	0
Reklame	10	10	14	8	58.2	65	68.36	77	29.73	19.79	30.02	16.74	20	22	61.6	71.5	24.83	25.87	9	9	9	10	-42.33	-26.33	-7.78	.3	34.33	28.95	25.7	24.53	18	19	-34.33	-3.53	31.89	24.73	0	0
Rekord	9	11	12	11	47	22.82	41.5	55.18	34.46	17.7	32.24	34.35	20	23	33.7	48.04	28.59	33.24	10	8	9	10	17.8	35	16	28.9	19.49	41.51	40.65	24.74	18	19	25.44	22.79	31.43	32.93	0	0
Rekrut	10	9	13	10	71.6	49.11	77.46	61.8	22.33	23.84	25.37	28.61	19	23	60.95	70.65	25.2	27.37	9	10	9	10	-22.78	-37.2	-45	-18.5	39.98	31.45	44.26	44.43	19	19	-30.37	-31.05	35.49	45.19	0	0
Rektor	11	9	13	10	50.18	49.78	62.77	65.7	29.15	26.12	34.37	29.77	20	23	50	64.04	27.1	31.76	11	7	9	10	-15.36	-5.43	7.56	18.8	33.53	13.1	28.89	29.75	18	19	-11.5	13.47	27.33	29.1	0	0
Relief	10	10	14	9	55.1	58.7	72.07	65.56	30.23	28.1	32.43	32.03	20	23	56.9	69.52	28.47	31.7	10	8	10	9	13.8	19	24.6	17.67	24.03	23	21.46	13.44	18	19	16.11	21.32	23.04	17.98	0	0
Rennen	9	11	13	10	61.22	67.36	72.85	67.9	30.1	21.25	22.05	29.54	20	23	64.6	70.7	25.08	25.07	10	9	9	10	13.5	6	18.56	8.5	35	28	22.04	27.93	19	19	9.95	13.26	31.24	25.15	0	0
Rennrad	10	11	12	10	83.2	94	96.5	87.3	15.37	4.94	4.27	13.61	21	22	88.86	92.32	12.21	10.53	10	9	10	9	21	9.89	17.8	16	41.14	37.23	37.88	26.3	19	19	15.74	16.95	38.66	32.03	0	0
Rennwagen	10	11	13	10	78.9	86.73	88.85	87.8	19.22	8.7	12.16	8.85	21	23	83	88.39	14.84	10.63	10	8	8	11	9.8	25.5	-12.63	-1.27	46.32	48.3	46.04	33.61	18	19	16.78	-6.05	46.49	38.54	0	0
Reptil	11	9	12	11	73.82	77.78	89.33	81.18	22.92	15.44	10.97	17.63	20	23	75.6	85.43	19.52	14.79	9	10	10	9	8.89	-4.2	-21.2	-37.67	26.59	49.43	51.14	41.84	19	19	2	-29	39.76	46.45	0	0
Republik	10	9	12	11	36.1	23.33	53.5	45.18	35.34	23.94	37.25	35.43	19	23	30.05	49.52	30.37	35.81	9	9	11	8	10.67	8	18.55	24.5	40.8	28.44	37.46	22.69	18	19	9.33	21.05	34.15	31.45	0	0
Reserve	11	9	12	11	36.18	35.33	43.92	37.36	28.55	22.22	35.68	35.78	20	23	35.8	40.78	25.24	35.07	9	9	10	9	8.56	16.11	23.6	35.33	34.56	28.08	40.28	33.56	18	19	12.33	29.16	30.8	36.72	0	0
Rettung	10	10	13	10	36.6	39.1	56.23	60.5	24.52	34.59	29.94	32.54	20	23	37.85	58.09	29.21	30.44	8	10	9	10	49.88	64.1	76.22	51	21.28	40.57	23.83	54.03	18	19	57.78	62.95	33.33	43.35	0	0
Reue	11	9	13	10	19.27	8.44	35.54	44.6	20.79	7.2	31.01	29.59	20	23	14.4	39.48	16.73	30.07	10	9	10	10	4.9	-21.22	-7.4	17.4	36.34	31.71	40.61	40.25	19	20	-7.47	5	35.87	41.35	0	0
Revolver	9	11	12	10	87.67	91.91	93.42	84.4	13.45	6.59	8.32	26.32	20	22	90	89.32	10.19	18.82	8	10	10	10	-19.75	-30.5	-74.4	-74.9	44.3	36.94	37.03	17.27	18	20	-25.72	-74.65	39.51	28.12	0	0
Rezept	11	8	14	9	54.18	64	76.07	79.22	29.09	23.45	21.84	21.24	19	23	58.32	77.3	26.62	21.17	9	10	8	11	32.67	39.3	17.13	23.73	21.83	40.03	32.1	26.21	19	19	36.16	20.95	32.01	28.17	0	0
Rhabarber	10	10	14	9	80.3	90.1	95.64	92.56	22.39	10.51	5.51	7.14	20	23	85.2	94.43	17.75	6.24	9	9	9	10	8.11	27.56	32	48.2	40.89	49.27	37.65	35.65	18	19	17.83	40.53	45.05	36.53	0	0
Richter	10	10	14	9	74	67.6	77.21	73.33	30.02	19.47	24.58	31.69	20	23	70.8	75.7	24.84	26.94	10	9	9	10	-7.5	-2.67	12.78	-1.5	44.57	32.83	39.69	28.43	19	19	-5.21	5.26	38.45	34.03	0	0
Richtung	10	10	12	11	39.8	41.5	49.92	43.55	25.42	22.81	37.95	29.79	20	23	40.65	46.87	23.52	33.68	10	8	8	11	5.6	6.63	11.25	12.64	25.22	10.76	18.06	14.83	18	19	6.06	12.05	19.61	15.8	0	0
Riegel	10	11	12	11	67.3	77.18	88.08	84.18	25.25	15.49	16.11	21.01	21	23	72.48	86.22	20.8	18.29	9	10	10	9	-4.89	-3.6	6.1	2.33	14.55	35.16	24.2	21.62	19	19	-4.21	4.32	26.69	22.46	0	0
Riemen	8	12	14	9	68.38	75.42	89.21	78.56	32	15.84	20.59	22.28	20	23	72.6	85.04	23.13	21.43	10	8	9	10	9.6	-16.13	19.44	-13.5	31.49	26.85	35.35	31.85	18	19	-1.83	2.11	31.54	36.72	0	0
Riese	11	10	12	11	77.45	87.3	93.5	87.45	13.79	12.61	6.75	10.62	21	23	82.14	90.61	13.85	9.14	9	10	7	12	16.22	1.1	-10.29	-12	36.83	39.7	24.44	29.59	19	19	8.26	-11.37	38.09	27.11	0	0
Rind	11	9	12	11	87	86.56	95.75	86.91	14.39	11.37	4.67	19.63	20	23	86.8	91.52	12.78	14.37	7	11	10	9	20.57	10.91	35.4	17.44	17.51	21.22	22.83	29.4	18	19	14.67	26.89	19.92	27.01	0	0
Rinde	10	11	11	12	70.8	80.91	88.91	84.75	32.02	15.32	14.49	22.07	21	23	76.1	86.74	24.61	18.53	8	10	9	11	19.13	27.4	15.11	12.91	12.62	28.16	21	15.86	18	20	23.72	13.9	22.43	17.87	0	0
Ring	9	12	11	12	93.78	94.08	96.09	93.5	8.7	7.79	6.12	7.26	21	23	93.95	94.74	7.98	6.72	10	8	9	10	28.6	54.5	37.67	48.5	29.54	29.31	32.01	29.78	18	19	40.11	43.37	31.48	30.49	0	0
Rippe	11	9	12	10	87.82	78.44	85.83	77.8	11.36	17.56	16.06	25.96	20	22	83.6	82.18	14.86	20.99	9	9	10	9	-3.89	3.33	22.2	13.22	14.46	29	27.37	21.24	18	19	-.28	17.95	22.54	24.42	0	0
Ritter	9	10	11	11	82	84.9	87.91	71.73	18.07	14.26	23.81	32.56	19	22	83.53	79.82	15.78	29.04	10	8	9	11	21.8	23.38	2	4.18	36.53	37.4	28.46	12.06	18	20	22.5	3.2	35.82	20.46	0	0
Robbe	11	9	13	10	90.82	88.44	95.31	88.1	11.9	11.93	7.61	16.9	20	23	89.75	92.17	11.66	12.72	9	10	9	10	44.11	38.5	55.22	31.5	27.45	36.73	26.24	21.28	19	19	41.16	42.74	31.9	26.08	0	0
Roboter	11	10	13	10	89.82	86.7	74.62	86	9.35	15.68	29.3	10.6	21	23	88.33	79.57	12.53	23.4	11	8	10	9	6.36	-7.5	-9.4	4.67	42.81	35.77	27.85	35.77	19	19	.53	-2.74	39.56	31.76	0	0
Rock	11	10	14	9	87.18	94.5	95.71	86.78	12.02	7.72	5.66	21.34	21	23	90.67	92.22	10.63	14.3	9	10	10	9	51.78	24.2	27	24.33	32.33	33	22.47	32.06	19	19	37.26	25.74	34.77	26.67	0	0
Roggen	11	8	11	12	74.73	75.63	90.09	84.92	20.96	18.52	16.18	22.11	19	23	75.11	87.39	19.43	19.25	9	9	9	10	15.78	7.44	39.11	35.6	20.83	10.41	18.06	25.52	18	19	11.61	37.26	16.54	21.77	0	0
Rohr	10	9	12	11	76.6	84.33	94.33	82.09	22.59	15	8.66	26.06	19	23	80.26	88.48	19.26	19.63	10	9	10	9	13.7	-3.56	12.2	1.44	34.31	9.94	24.54	11.04	19	19	5.53	7.11	26.66	19.64	0	0
Rohrzange	9	9	10	13	86.11	78.44	84.1	89.62	15.85	14.1	30.85	18.1	18	23	82.28	87.22	15.08	24	9	9	9	10	-7.89	-10	22.44	14.1	13.73	17.51	25.97	18.65	18	19	-8.94	18.05	15.3	22.18	0	0
Rolle	10	10	12	11	56.8	69.2	85.67	79.82	24.8	17.84	16.37	27.1	20	23	63	82.87	21.97	21.84	10	8	8	11	5	7.25	18.13	23.64	14.51	27.81	22.34	28.29	18	19	6	21.32	20.77	25.43	0	0
Roller	11	11	11	12	83.82	89.64	87.73	84.83	16.87	9.01	18.87	16.29	22	23	86.73	86.22	13.53	17.23	9	10	9	10	27.22	18.5	34	32.6	15.18	26.29	30.54	27.44	19	19	22.63	33.26	21.64	28.13	0	0
Rollstuhl	10	10	11	11	93.9	93.6	91.18	85.64	10.76	7.59	9.14	12.72	20	22	93.75	88.41	9.07	11.18	9	10	9	10	-42.33	-36	-43.56	-51.4	26.13	32.61	42.95	31.67	19	19	-39	-47.68	29.08	36.57	0	0
Rom	11	9	12	11	69.82	66.78	89.33	82.09	28.75	23.39	15.07	22.77	20	23	68.45	85.87	25.84	19.05	10	8	10	9	38.6	49.75	39.8	56	39.87	42.05	34.96	33.25	18	19	43.56	47.47	40.03	34.23	0	0
Roman	10	10	11	11	51.7	73.3	69.45	76.09	34.42	24.12	35.7	27.51	20	22	62.5	72.77	30.98	31.29	8	11	9	10	21.25	59.18	27.67	50.6	24.64	31.35	21.52	25.61	19	19	43.21	39.74	33.95	25.92	0	0
Römer	10	10	10	12	76.9	52.4	68.8	64.33	28.35	30.18	34.78	33.04	20	22	64.65	66.36	31.15	33.1	11	8	9	10	19.64	.25	9.78	16.1	37.97	8.14	14.16	16.9	19	19	11.47	13.11	30.39	15.57	0	0
Rose	11	10	13	10	96.45	96.4	97.85	95.3	5.68	5.6	3.11	3.68	21	23	96.43	96.74	5.5	3.53	9	10	9	10	41.44	53.7	76.33	58.9	29.33	30.5	21.24	33.75	19	19	47.89	67.16	29.78	29.15	0	0
Rosenkohl	10	10	13	10	81.4	92	96.46	89.4	17.44	10.11	4.99	13.57	20	23	86.7	93.39	14.9	10.08	10	9	10	9	23.2	-3	41.5	34.22	48.34	37.02	27.88	29.87	19	19	10.79	38.05	44.25	28.27	0	0
Rosine	9	9	13	10	81.11	86.33	96.69	91.6	25.75	18.43	5.39	11.09	18	23	83.72	94.48	21.89	8.53	10	8	10	9	21	6.5	47	58.44	17.27	33.02	24.82	23.82	18	19	14.56	52.42	25.72	24.39	0	0
Rost	10	9	12	11	75.6	79.67	81.08	81.09	27.91	20.04	16.62	18.22	19	23	77.53	81.09	23.92	17	8	10	10	9	-17	-23.8	-33	-44.11	24.54	31.86	27.24	26.2	18	19	-20.78	-38.26	28.24	26.62	0	0
Rotkohl	11	10	13	10	86.45	94.7	96.15	81.6	11.5	7.78	5.96	15.63	21	23	90.38	89.83	10.54	13.18	10	8	8	11	24.4	24	52.25	29.09	37.21	41.25	28.17	24.24	18	19	24.22	38.84	37.86	27.81	0	0
Rübe	10	11	12	10	82.7	83.64	96.67	88.1	14.52	18.53	3.37	12.57	21	22	83.19	92.77	16.33	9.63	10	9	9	10	1.1	12.56	34	12.4	21.35	17.9	33.49	24.66	19	19	6.53	22.63	20.12	30.42	0	0
Rubin	12	9	13	9	70.75	76.44	81.85	75	26.07	16.15	21.27	27.66	21	22	73.19	79.05	22.05	23.7	11	7	9	10	21.91	41.57	48.67	46.9	16.94	43.05	33.07	24.96	18	19	29.56	47.74	30.33	28.26	0	0
Rubrik	11	10	11	12	35.82	31.1	42.82	53	24.58	25.5	26.86	29.03	21	23	33.57	48.13	24.51	27.87	9	9	10	9	6.67	4.22	5.8	11.56	20.57	8.94	13.21	20.35	18	19	5.44	8.53	15.44	16.73	0	0
Rücken	12	7	11	12	82.42	88.14	86.27	90.83	15.77	11.19	16.39	13.89	19	23	84.53	88.65	14.21	14.97	9	9	10	9	19.33	11.33	14.4	12.78	36.91	40.47	26.96	27.55	18	19	15.33	13.63	37.8	26.49	0	0
Rückgrat	11	8	10	12	40.45	40.25	74.3	78.75	29.13	28.31	30.65	20.15	19	22	40.37	76.73	27.98	24.91	8	10	9	10	13.63	30.4	16.56	37	40.59	31.92	34.47	28.3	18	19	22.94	27.32	35.94	32.23	.03	0
Rucksack	10	9	11	12	91.8	96.67	96.82	84.92	8.52	3.71	4	15.37	19	23	94.11	90.61	6.98	12.74	9	10	8	11	44.33	37.2	26	23.18	28.66	35.93	27.61	30.24	19	19	40.58	24.37	32	28.4	0	0
Rudel	11	8	11	12	70.55	71.25	76.91	72.17	24.44	16.04	16.93	26.89	19	23	70.84	74.43	20.78	22.31	11	7	8	11	9.55	4	6.5	-6.09	28.61	35.02	26.8	35.3	18	19	7.39	-.79	30.37	31.82	0	0
Ruder	12	8	13	10	88.83	92.38	91.08	90.1	8.29	9.53	13.68	9.11	20	23	90.25	90.65	8.74	11.68	8	10	9	10	20.75	25.4	30.33	19.8	16.8	32.42	38.83	16.68	18	19	23.33	24.79	26.05	28.96	0	0
Ruf	14	15	15	17	42.71	46.2	52.2	53.94	23.45	28.95	27.72	25.53	29	32	44.52	53.13	26.03	26.16	9	9	9	10	-2.22	12.22	5	19	15.14	23.32	12.77	26.18	18	19	5	12.37	20.47	21.6	0	0
Ruhe	11	10	12	11	43.09	25.5	55.42	50.55	31.78	21.66	35.52	32.7	21	23	34.71	53.09	28.23	33.51	9	9	9	10	61.56	68.56	54	81.2	31.19	24.42	22.58	22.76	18	19	65.06	68.32	27.41	26.09	0	0
Ruhm	10	10	12	11	43.3	20.4	28.08	33.82	31.01	15.9	24.37	26.34	20	23	31.85	30.83	26.71	24.92	10	8	9	10	33.8	21.75	25.56	16.1	33.6	33.38	31.64	24.52	18	19	28.44	20.58	33.08	27.73	0	0
Ruine	10	10	13	10	70.1	79.5	90.62	77.7	28.52	15.71	9.67	26.94	20	23	74.8	85	22.92	19.76	11	8	9	10	-.27	-11.5	-40.89	-29.2	51.36	45.1	46.54	32.48	19	19	-5	-34.74	47.84	39.06	0	0
Rundfunk	11	9	11	11	44	30.56	60.64	83.82	30.55	23.38	35.53	17.35	20	22	37.95	72.23	27.72	29.75	9	9	9	10	16.33	26.78	32.78	41.4	25.79	34	32.9	28.95	18	19	21.56	37.32	29.76	30.33	0	0
Rüssel	12	8	12	10	86.33	86.13	95.25	86.2	10.22	10.83	7.64	14.62	20	22	86.25	91.14	10.18	11.98	9	9	9	10	14.11	28.22	17.56	23	15.96	34.11	30.9	22.91	18	19	21.17	20.42	26.83	26.35	0	0
Rüstung	10	10	12	11	73.7	83.6	62	82.82	22.32	11.84	33.56	20.02	20	23	78.65	71.96	18.12	29.3	9	9	8	11	22.67	-16.33	-52	-31.73	48.47	45.96	53.51	31.64	18	19	3.17	-40.26	50.02	42.13	0	0
Rutsche	11	9	13	10	84.64	92.78	87.15	87.5	9.96	6.34	13.42	13.52	20	23	88.3	87.3	9.3	13.15	8	10	8	11	26.38	34.5	12.5	19.18	18.75	32.83	30.47	25.78	18	19	30.89	16.37	27.07	27.23	0	0
Saal	10	11	11	11	81.5	78.45	91	80.73	14.39	17.71	12.91	16.31	21	22	79.9	85.86	15.89	15.29	10	9	8	11	8.4	35.33	6.13	20.91	17.46	38.95	17.1	21.04	19	19	21.16	14.68	31.9	20.4	0	0
Säbel	10	10	11	10	80.8	86.7	92.36	82.1	16.84	11.77	11.1	21.72	20	21	83.75	87.48	14.46	17.36	12	7	10	10	-3.42	-16.43	-41.5	-32	33.68	34.37	28.94	32.14	19	20	-8.21	-36.75	33.59	30.16	0	.04
Sache	9	10	13	9	28.44	24.5	52.77	54.56	14.33	19.34	34.85	41.56	19	22	26.37	53.5	16.8	36.78	11	7	9	10	6.82	.43	1.78	9.3	27.56	.79	8.5	27.13	18	19	4.33	5.74	21.38	20.37	0	0
Sack	10	9	11	11	89.1	92.22	98.18	84.27	9.57	9.97	2.71	21.48	19	22	90.58	91.23	9.62	16.55	9	9	10	9	1.67	-5.11	-.8	-5.11	33.85	14.71	22.34	36.75	18	19	-1.72	-2.84	25.56	29.24	0	0
Saft	11	9	10	13	70.82	87.33	86.5	85.54	29.73	12.75	25.89	15.57	20	23	78.25	85.96	24.59	20.17	10	8	9	10	27.5	31.5	44.89	48	19.37	31.49	31.88	25.97	18	19	29.28	46.53	24.72	28.13	0	0
Säge	12	9	14	9	90.25	93.89	94.71	81.67	10.06	9.71	7.01	23.16	21	23	91.81	89.61	9.84	16.32	9	10	10	9	-4.22	-26.2	22.5	-8.11	20.83	34.88	25.18	27.37	19	19	-15.79	8	30.47	29.94	0	0
Sahne	12	9	10	13	79.92	91.78	83.2	84.08	18.6	9.65	23.27	18.71	21	23	85	83.7	16.24	20.31	8	10	10	11	17.5	31	40.7	47.09	44.37	26.11	29.56	25.78	18	21	25	44.05	34.91	27.13	0	0
Salami	11	9	13	10	90.91	93.89	91.15	92.8	6.74	6.99	13.16	13.93	20	23	92.25	91.87	6.84	13.21	8	10	9	11	10.5	12.3	53.89	34.45	34.23	30.92	29.39	34.97	18	20	11.5	43.2	31.45	33.25	0	0
Salat	11	9	11	10	87.09	91	94.09	91.9	14.9	8.51	7.15	6.67	20	21	88.85	93.05	12.3	6.84	9	9	9	10	27.44	39.56	36	60.4	21.72	31.22	33.96	24.43	18	19	33.5	48.84	26.82	31.11	0	.04
Salbe	12	9	12	11	71.17	71.67	82.83	82.82	29.17	22.77	17.4	19.54	21	23	71.38	82.83	25.99	18.03	8	11	9	10	18	25.45	38.67	27.9	30.37	29.15	34.12	18.32	19	19	22.32	33	29.07	26.75	0	0
Salon	10	10	12	11	68	61.9	67.33	85.36	21.8	25.63	27.51	18.82	20	23	64.95	75.96	23.37	24.98	9	9	9	11	35.44	20.22	22.67	29.45	29.1	20.84	10.32	24.49	18	20	27.83	26.4	25.77	19.3	0	0
Salz	11	9	11	12	83.91	83.78	90.36	87.92	14.22	11.83	14.62	18.36	20	23	83.85	89.09	12.86	16.35	9	10	8	11	18.11	6.1	25	26.91	13.22	6.35	23	25.52	19	19	11.79	26.11	11.66	23.84	0	0
Samen	11	11	11	11	71.09	83.09	91.91	84.64	27.61	21.3	9.35	20.76	22	22	77.09	88.27	24.83	16.15	10	9	9	10	28.9	10.33	44.44	22.8	31.49	27.14	27.14	29.86	19	19	20.11	33.05	30.23	29.94	0	0
Samt	9	12	12	11	65.44	75.67	80.17	77.55	30.49	23.36	25.28	28.63	21	23	71.29	78.91	26.43	26.34	8	10	9	10	47	52.9	27.89	49.6	17.07	28.64	27.79	30.45	18	19	50.28	39.32	23.74	30.51	0	0
Sand	9	10	11	10	81.56	93.6	89.91	84.7	23.39	9.95	21.66	17.58	19	21	87.89	87.43	18.19	19.51	10	9	10	9	31	55.89	8.8	51.89	23.38	39.78	36.13	28.36	19	19	42.79	29.21	33.76	38.71	0	0
Sandale	10	9	13	10	78.8	86.78	92.23	88.8	24.72	14.58	14.86	9.2	19	23	82.58	90.74	20.42	12.57	9	9	9	10	23.33	28.33	28.78	34	15.31	33.06	22.02	24.3	18	19	25.83	31.53	25.13	22.76	0	0
Sandburg	11	9	12	11	81	91.33	92.33	86.45	17.48	7.19	10.9	15.04	20	23	85.65	89.52	14.51	13.09	8	10	9	10	43.25	52.7	16.44	49.2	18.87	36.71	51.82	24.36	18	19	48.5	33.68	29.72	42.1	0	0
Sandkiste	10	9	12	10	67.1	89.44	87.17	91	24.36	13.34	12.45	11.35	19	22	77.68	88.91	22.52	11.84	9	10	9	11	21.44	32.4	13.22	15.73	23.4	28.34	19.9	31.25	19	20	27.21	14.6	26.01	26.12	0	0
Sandwich	8	11	11	11	77.75	90.64	89.91	82.73	17.84	11.04	11.85	16.57	19	22	85.21	86.32	15.3	14.53	10	8	9	10	31	39.75	29.33	27.9	35.85	41.93	21.58	32.16	18	19	34.89	28.58	37.74	26.92	0	0
Sänfte	10	9	13	10	65.2	65.78	75.15	86.1	35.93	32.07	28.44	14.61	19	23	65.47	79.91	33.2	23.65	10	9	10	9	17.9	-1.44	17.6	4.78	33.78	64.72	21.18	16.88	19	19	8.74	11.53	50.31	19.85	0	0
Sanftmut	12	9	12	11	21.5	18.56	46.25	36.45	18.32	17.07	31.37	32.36	21	23	20.24	41.57	17.42	31.51	10	9	9	10	60	52.89	69.78	49.6	25.73	39.38	24.95	41.74	19	19	56.63	59.16	32.15	35.42	0	0
Sänger	11	7	12	11	78.73	57.71	82.83	78	31.28	21.59	20.81	25.07	18	23	70.56	80.52	29.18	22.55	8	10	9	10	34.5	40.3	53.33	44.3	25.26	30.61	21.44	34.04	18	19	37.72	48.58	27.7	28.37	0	0
Sardine	11	10	13	9	76.64	81.7	89	84.33	16.32	13.59	13.62	21.7	21	22	79.05	87.09	14.93	17.06	10	8	8	11	10.6	-3.88	45	25	24.82	23.04	21.76	33.15	18	19	4.17	33.42	24.48	29.96	0	0
Sarg	8	11	11	12	89.38	95.27	91.82	86	10.9	4.22	15.09	19.74	19	23	92.79	88.78	8.07	17.52	9	9	9	10	-65.33	-64.56	-92.67	-84.7	38.11	40.27	13.63	18.43	18	19	-64.94	-88.47	38.04	16.41	0	0
Satan	11	10	12	11	48.09	63.7	45.83	55.82	37.81	29.5	32.51	37.86	21	23	55.52	50.61	34.21	34.73	11	7	9	11	-45.64	-67.14	-84.67	-61.73	38.93	40.71	25.67	36.59	18	20	-54	-72.05	39.91	33.45	0	0
Satellit	11	9	12	11	84.91	69.22	77.08	80	16.18	28.72	34.51	18.79	20	23	77.85	78.48	23.43	27.53	8	10	10	9	21.5	9.5	32.7	18.78	35.73	27.46	24.32	18.79	18	19	14.83	26.11	31.03	22.44	0	0
Satin	12	9	13	10	62.25	70.11	55.38	80.7	27.36	19.09	34.6	24.64	21	23	65.62	66.39	23.94	32.65	11	8	9	10	15.91	31.75	17.89	20.8	21.88	27.16	15.52	41.72	19	19	22.58	19.42	24.85	31.3	0	0
Sattel	10	10	12	11	85.7	91.1	90.75	84.55	14.51	9	11.95	14.1	20	23	88.4	87.78	12.07	13.11	11	8	8	12	26.73	15.25	21.13	13.83	32.78	17.24	23.93	22.23	19	20	21.89	16.75	27.32	22.59	0	0
Saturn	10	10	13	10	79.6	68.4	83	72.8	23.59	30.81	20.17	28.64	20	23	74	78.57	27.32	24.17	9	9	9	10	28.11	14	12.22	19.8	28.61	18.9	33.33	19.87	18	19	21.06	16.21	24.62	26.57	0	0
Satz	11	11	12	10	34.55	33.55	49.25	55.8	25.4	27.82	41.12	32.75	22	22	34.05	52.23	26	36.83	11	8	10	9	6.27	9.75	18.8	25.22	8.32	17.47	38.21	25.66	19	19	7.74	21.84	12.66	32.15	0	0
Sauberkeit	11	9	13	10	34.91	35.89	51.69	80.3	28.8	21.19	24.99	22.12	20	23	35.35	64.13	25.01	27.4	10	9	8	11	35.5	25.67	78.5	66.73	33.51	38.87	27.83	35.19	19	19	30.84	71.68	35.47	32.01	0	0
Sauerkraut	11	10	13	10	81.82	82.6	94.77	82.9	16.07	15.79	8.38	27.16	21	23	82.19	89.61	15.54	19.4	10	9	7	12	24.1	-10.22	48.86	38.67	39.72	45.17	24.62	30.48	19	19	7.84	42.42	44.78	28.2	0	0
Sauerstoff	9	11	12	10	48.33	34	42.33	57	36.02	21.6	35.97	39.47	20	22	40.45	49	29.07	37.43	10	8	11	8	31.6	53.38	57.73	60.75	31.64	33.44	31.8	31.59	18	19	41.28	59	33.39	30.86	0	0
Säugetier	9	10	12	11	59.67	49.1	82	86.36	19.31	24.22	17.93	15	19	23	54.11	84.09	22.1	16.37	9	10	10	9	34.44	23.7	37.6	21.44	29.2	27.19	23.38	25.69	19	19	28.79	29.95	27.91	25.2	0	0
Säule	9	11	12	11	84	85.91	91.33	83.27	11.48	13.01	7.64	20.22	20	23	85.05	87.48	12.06	15.23	10	8	7	11	17.7	20.63	15	19.45	12.52	21.65	13.84	18.06	18	18	19	17.72	16.68	16.27	0	0
Saum	11	10	11	12	54.73	70	83.82	82.08	30.65	26.36	28.77	18.74	21	23	62	82.91	29.05	23.51	9	9	9	9	9	10.56	6.89	7	21.41	27	13.59	9.92	18	18	9.78	6.94	23.65	11.54	0	0
Sauna	8	12	12	11	83.5	90.67	86.25	85	21.25	7.61	19.04	17.62	20	23	87.8	85.65	14.59	17.97	9	9	10	10	28.89	52	11.1	47.1	51.15	41.91	38.68	37.93	18	20	40.44	29.1	46.9	41.61	0	0
Säure	11	10	11	12	67.55	44.7	34.73	56.17	25.54	25.48	21.85	33.1	21	23	56.67	45.91	27.48	29.74	8	11	8	11	-28.63	-39.55	-54.75	-48.27	26.87	30.67	32.73	27.75	19	19	-34.95	-51	28.88	29.24	0	0
Saxophon	10	9	14	9	92.6	94.33	96.43	89.56	10.45	5.94	6.03	16.08	19	23	93.42	93.74	8.43	11.28	11	8	9	10	22.18	36.5	36.56	43.3	31.09	44.78	20.79	28.2	19	19	28.21	40.11	37.01	24.53	0	0
Schabe	10	9	13	10	77.1	76.67	73.38	79.7	20.57	14.58	31.61	24.43	19	23	76.89	76.13	17.49	28.28	8	10	9	10	-34.88	-38.1	-67	-65.2	30.27	21.42	33.68	21.8	18	19	-36.67	-66.05	24.96	27.25	0	0
Schablone	9	10	12	11	75.78	73.5	76.75	76.55	22.79	23	29.67	25.35	19	23	74.58	76.65	22.29	27.06	10	8	9	11	4.8	2.38	13.11	12.18	24.01	21.64	17.74	19.25	18	20	3.72	12.6	22.35	18.1	0	0
Schach	12	9	10	13	81.17	90.67	92.6	76.69	16.89	13.02	11.99	18.26	21	23	85.24	83.61	15.75	17.49	10	8	10	9	30.4	25	26.8	37.78	23.08	32.47	33.9	26.39	18	19	28	32	26.9	30.26	0	0
Schachtel	10	11	12	11	83.1	88.82	89.08	77.73	12.16	7.07	16.43	24.07	21	23	86.1	83.65	10	20.79	10	9	10	9	5.2	16.78	3.4	23.67	18.04	24.35	16.34	27.62	19	19	10.68	13	21.48	24.1	0	0
Schädel	9	11	11	11	90.22	85.27	93.36	84.55	9.63	12.91	7.46	22.17	20	22	87.5	88.95	11.54	16.76	9	9	9	10	-22.22	-10.67	10.11	4.1	29.66	21.06	35.89	12.64	18	19	-16.44	6.95	25.65	25.73	0	0
Schaden	10	11	13	10	45.2	33.82	53.31	52	31.6	21.66	27.59	35.23	21	23	39.24	52.74	26.79	30.39	7	11	10	9	-46.43	-46.73	-63.3	-66.56	32.38	25.89	27.92	26.59	18	19	-46.61	-64.84	27.65	26.59	0	0
Schaf	11	10	13	10	89.64	97.4	95.62	93.8	9.8	3.66	7.89	8.13	21	23	93.33	94.83	8.36	7.87	10	8	8	11	18.9	33	46.88	24.55	13.62	39.36	24.58	15.57	18	19	25.17	33.95	28.07	22.32	0	0
Schäfer	12	7	14	9	72.42	83.86	92.93	79.56	21.6	11.77	9.34	22.83	19	23	76.63	87.7	19.06	16.9	8	11	9	10	28.38	33.18	35.33	30.7	20.99	35.48	23.87	29.53	19	19	31.16	32.89	29.61	26.36	0	0
Schaffner	10	9	12	11	68.7	63.67	84.42	89	16.66	20.19	21.2	17.45	19	23	66.32	86.61	18.07	19.2	10	8	9	11	-7.6	-7.25	8.56	15.36	27.17	23.9	37.93	25.86	18	20	-7.44	12.3	25.02	31.14	0	0
Schal	10	10	10	12	83.8	92.6	93.3	90.92	13.89	4.79	10.22	12.3	20	22	88.2	92	11.08	11.2	9	9	10	10	27.22	39	37.8	43.4	20.49	32.59	30.52	34.31	18	20	33.11	40.6	27.09	31.73	0	0
Schale	11	10	13	10	80	83.4	87.92	80.8	17.64	19.84	15.39	24.74	21	23	81.62	84.83	18.32	19.81	10	8	10	9	11.9	1.63	7.7	15.44	15.74	4.63	14.06	22.83	18	19	7.33	11.37	12.95	18.61	0	0
Schalmei	8	9	11	12	55.13	46.67	76.45	75.92	32.5	33.25	25.4	24.37	17	23	50.65	76.17	32.15	24.29	8	8	9	10	26.88	5	9.33	19	34.74	12.17	26.85	35.24	16	19	15.94	14.42	27.56	31.08	.21	0
Scham	9	11	12	11	57.56	31.73	42.75	39.73	40.9	21.28	32.83	38.23	20	23	43.35	41.3	33.41	34.73	9	9	9	10	-25.22	-55.78	-18.33	-31.3	44.97	29.83	41.88	31.47	18	19	-40.5	-25.16	40.22	36.32	0	0
Schatten	11	10	11	12	77.73	79.6	85.91	70.25	20.44	9.89	16.31	33.36	21	23	78.62	77.74	15.93	27.23	8	10	10	9	15.63	-6.1	-3.1	10.78	39.41	50.27	37.83	25.01	18	19	3.56	3.47	45.83	32.31	0	0
Schatulle	11	9	12	10	78	76.67	82.17	72.4	16.73	19.77	14.99	26.5	20	22	77.4	77.73	17.68	21.06	10	9	9	10	13.4	28.33	23.67	24.2	34.29	23.62	23.25	20.37	19	19	20.47	23.95	29.91	21.16	0	0
Schatz	10	10	12	11	71.3	76.6	71.58	67	32.57	22.68	24.37	29.26	20	23	73.95	69.39	27.45	26.3	10	9	9	10	45.8	64.67	59.44	48.7	42.53	37.47	34.57	34.04	19	19	54.74	53.79	40.27	33.77	0	0
Schau	10	10	13	9	34.3	31.4	51.77	73.33	21.18	24.05	33.17	30.1	20	22	32.85	60.59	22.1	33.04	11	7	9	10	7.27	11.14	9.67	24.9	23.25	30.34	11.97	39.44	18	19	8.78	17.68	25.43	30.04	0	0
Schaufel	10	10	10	12	82.6	92.2	93.1	87.5	15.97	6.96	9.98	17.77	20	22	87.4	90.05	12.96	14.7	9	10	9	10	-.56	-4.2	3.22	1.6	13.08	25.09	16.28	19.73	19	19	-2.47	2.37	19.86	17.7	0	0
Schaukel	11	9	11	12	81.09	88.78	95.36	92.67	26.11	9.26	6.47	9.3	20	23	84.55	93.96	20.25	8.01	10	9	9	10	24.6	44.44	32.22	40.5	20.74	33.54	23.94	27.33	19	19	34	36.58	28.61	25.42	0	0
Schaum	10	11	13	10	78	84.18	83.31	84.7	15.33	14.81	22.94	22.07	21	23	81.24	83.91	15.01	22.06	8	10	10	9	9.75	30.9	14.5	8.44	23.93	29.89	18.69	27.43	18	19	21.5	11.63	28.73	22.78	0	0
Schauspiel	11	11	12	10	41.18	52.64	68.75	66.3	28.74	30.47	33.61	28.58	22	22	46.91	67.64	29.49	30.72	8	10	11	7	10.5	35.9	33.18	62.43	19	41.78	21.39	24.67	18	18	24.61	44.56	35.24	26.44	0	0
Scheck	8	13	10	13	61.13	68.31	87.4	90.62	33.8	22.85	13.95	11.54	21	23	65.57	89.22	26.94	12.44	9	10	9	10	30.67	18.3	44.44	49.6	17.87	34.91	32.57	23.68	19	19	24.16	47.16	28.14	27.55	0	0
Scheibe	11	11	13	10	70.73	68.36	81.62	79.9	25.31	28.31	21.66	22.04	22	23	69.55	80.87	26.23	21.34	9	10	7	12	1.44	6.3	16.14	18.33	19.18	14.16	21.35	16.01	19	19	4	17.53	16.43	17.6	0	0
Scheich	9	11	11	11	77.33	70.09	72.18	68.82	19.61	16.43	22.86	19.61	20	22	73.35	70.5	17.82	20.85	10	8	10	9	-11.3	9	-20.5	-6.56	36.66	23.44	30.45	47.36	18	19	-2.28	-13.89	32.34	38.88	0	0
Schelm	10	9	13	10	51.4	27	56.31	78.5	30.34	20.96	27.11	23.5	19	23	39.84	65.96	28.5	27.45	9	10	9	10	28.67	29.3	27.67	18	34.01	32.06	20.03	30.04	19	19	29	22.58	32.06	25.58	0	0
Schema	11	10	12	11	27.91	28.3	36.17	51.45	16.59	19.44	31.87	35.33	21	23	28.1	43.48	17.54	33.71	9	9	9	10	-1.33	.33	-1.56	7.5	20.37	24.56	24.07	13.06	18	19	-.5	3.21	21.91	19.09	0	0
Schemel	9	11	14	9	72	79.73	91.71	81.11	28.74	21.19	12.78	26.08	20	23	76.25	87.57	24.49	19.29	10	8	9	10	10.8	10	18.56	5.3	14.76	23.59	20.65	9.76	18	19	10.44	11.58	18.56	16.84	0	0
Schenkel	13	8	14	9	74.46	83.5	91.21	90	27.97	9.32	13.42	10.93	21	23	77.9	90.74	22.8	12.26	8	10	10	9	43.75	11.1	18.8	15.56	43.4	24.92	18.02	25.1	18	19	25.61	17.26	37.19	21.09	0	0
Scherben	10	9	11	11	65.1	87.11	82.45	87.55	29.18	16.22	16.78	17.46	19	22	75.53	85	25.89	16.91	10	9	8	11	-33.5	-32.44	-41	-36.27	35.3	33.34	27.46	35.3	19	19	-33	-38.26	33.42	31.49	0	0
Schere	9	10	12	11	91.78	93.7	96.83	89.36	10.47	9.99	4.22	17.46	19	23	92.79	93.26	9.98	12.73	9	9	9	10	1.22	-4	8.89	6	26.96	22.27	25.44	27.62	18	19	-1.39	7.37	24.14	25.91	0	0
Scherz	11	9	12	10	23.27	20.78	33.17	54.9	24.22	16.84	31.75	25.63	20	22	22.15	43.05	20.73	30.53	9	9	8	12	18.33	54.67	48.75	54.92	22.3	28.36	22.95	27.3	18	20	36.5	52.45	31.02	25.2	0	0
Scheu	10	10	12	11	35.9	18.1	38.75	35.45	33.85	19.05	31.69	34.31	20	23	27	37.17	28.25	32.25	10	8	9	10	-7.4	-15.88	-28.89	-11.1	23.2	24.12	34.79	21.21	18	19	-11.17	-19.53	23.31	29.09	0	0
Scheusal	10	10	12	11	39.8	27.4	47.67	51.18	30.5	24.04	20.35	33.59	20	23	33.6	49.35	27.48	26.89	10	8	8	11	-46.7	-53.13	-61.63	-64.91	26.08	34.79	22.14	24.19	18	19	-49.56	-63.53	29.48	22.77	0	0
Schicksal	11	10	12	11	24.55	17.7	26.5	33.55	22.97	17.73	26.26	33.34	21	23	21.29	29.87	20.44	29.38	10	8	9	10	-31.5	-12.38	-8.67	7.6	30.89	43.1	28.3	32.28	18	19	-23	-.11	36.95	30.77	0	0
Schienbein	10	11	13	10	74	82.36	82.69	81.5	27.47	16.67	20.16	18.22	21	23	78.38	82.17	22.29	18.92	9	9	9	10	-.44	-.78	-.78	14.5	37.25	22.06	31.71	26.55	18	19	-.61	7.26	29.7	29.34	0	0
Schiene	10	10	10	13	84.6	77.8	92.3	77.46	16.02	17.72	12.02	26.05	20	23	81.2	83.91	16.81	22.04	8	10	10	9	5.25	-3.2	16.7	12.56	25.23	14.37	25.29	10.3	18	19	.56	14.74	19.75	19.28	0	0
Schiff	11	10	14	9	94.73	94.8	98.29	88.22	6.02	6.23	2.3	11.37	21	23	94.76	94.35	5.97	8.68	10	8	9	10	37.4	42.13	41.78	49.8	26.2	37.05	28.48	27.59	18	19	39.5	46	30.57	27.53	0	0
Schild	11	9	13	10	79.73	89.78	84.77	85.2	19.26	12.27	17.15	14.44	20	23	84.25	84.96	16.88	15.68	9	10	8	11	9.44	10.3	5	15.45	25.14	21.05	16.04	26.44	19	19	9.89	11.05	22.42	22.73	0	0
Schilf	10	11	12	11	79.9	79.82	92.83	83	19.04	16.58	13.56	20.58	21	23	79.86	88.13	17.34	17.59	10	8	9	9	26	35.63	29	22.56	19.26	32.4	46.92	32.27	18	18	30.28	25.78	25.55	39.2	0	0
Schimmel	10	10	13	10	86.2	89.9	79	80.5	10.62	12.91	23.91	24.5	20	23	88.05	79.65	11.66	23.62	11	7	9	10	-36.45	-21.57	-44.67	-38.3	42.3	47.12	42.47	53.55	18	19	-30.67	-41.32	43.5	47.39	0	0
Schimmer	10	12	14	9	42.5	66.25	36.57	43.67	34.22	23.41	28.22	34.83	22	23	55.45	39.35	30.58	30.4	9	10	9	10	11.22	24.8	15.44	15.2	18.44	15.24	15.21	20.93	19	19	18.37	15.32	17.77	17.94	0	0
Schimpanse	9	11	12	11	94.33	90.64	93.75	93.09	6.82	7.19	8.9	8.68	20	23	92.3	93.43	7.09	8.6	10	8	8	11	34.5	27.25	48.75	40.18	18.23	35.27	24.17	26.78	18	19	31.28	43.79	26.49	25.39	0	0
Schindel	6	9	12	11	47.17	56.22	83.42	80.55	42.98	22.07	25.81	21.04	15	23	52.6	82.04	30.97	23.16	9	7	8	11	-11.11	-8.71	14.5	.91	29.45	28.58	14.86	25.22	16	19	-10.06	6.63	28.12	22.06	.15	0
Schinken	9	10	13	10	86.67	88.3	93.54	85	13.39	12.46	6.96	20.25	19	23	87.53	89.83	12.57	14.59	9	9	9	10	38.89	25.89	46.22	30.6	29.86	35.35	24.72	36.59	18	19	32.39	38	32.44	31.7	0	0
Schippe	11	10	13	10	86.64	80.7	93.08	88.2	11.46	11.03	9.6	10.51	21	23	83.81	90.96	11.38	10.07	10	9	9	10	14.9	-5.11	19.78	16.1	13.43	11.62	23.25	17.69	19	19	5.42	17.84	15.99	20.01	0	0
Schirm	12	9	13	10	84.25	95.78	97.77	91	15.29	4.66	2.01	18.94	21	23	89.19	94.83	13.09	12.68	10	8	8	11	15.6	17.75	43.63	31.36	27.43	25.55	30.25	33.02	18	19	16.56	36.53	25.85	31.63	0	0
Schlacht	11	8	14	9	68.45	57.75	70.29	52.67	21.34	26.4	24.95	36.36	19	23	63.95	63.39	23.52	30.43	10	8	9	10	-22.6	-51.13	-74.11	-74.9	46.38	53.16	26.47	30.25	18	19	-35.28	-74.53	50.15	27.73	0	0
Schlaf	10	10	13	10	50.8	50.4	59.92	58.9	30.1	34.02	31.91	35.99	20	23	50.6	59.48	31.26	32.95	10	8	10	10	72.9	64.75	51.2	78.2	23.47	30.38	29.45	20.08	18	20	69.28	64.7	26.25	28.17	0	0
Schlafsack	11	8	13	10	91.27	95.88	87.69	87.1	9.56	3.83	13.1	13.32	19	23	93.21	87.43	7.87	12.9	9	9	10	9	38.22	43.89	23.9	30.22	28.91	34.86	27.34	13.29	18	19	41.06	26.89	31.2	21.51	0	0
Schlagzeug	10	9	13	10	95	93.11	85.15	89.9	6.57	6.99	24.35	13.67	19	23	94.11	87.22	6.65	20.14	7	11	8	11	35.29	32.36	-3.38	27.36	42.01	31.2	35.1	28.37	18	19	33.5	14.42	34.61	34.19	0	0
Schlamm	12	9	13	10	80.75	82.89	82.23	85.5	20.83	15.32	18.59	14.94	21	23	81.67	83.65	18.27	16.81	11	8	10	9	-14.73	-21.5	-22.1	-42	34.7	27.69	29.99	30.85	19	19	-17.58	-31.53	31.29	31.26	0	0
Schlange	11	9	11	11	87.55	97.67	94.27	91.64	12.63	2.6	6.08	7.39	20	22	92.1	92.95	10.65	6.74	9	9	10	9	-3.44	-22.44	-31.8	-58.56	39.18	42.11	37.98	33.43	18	19	-12.94	-44.47	40.65	37.5	0	0
Schlauch	12	9	13	10	71	89	92.08	84.1	24.57	11.63	8.66	17.14	21	23	78.71	88.61	21.66	13.32	10	8	10	9	11.1	.5	16.3	13.22	15.36	4.41	14.08	19.78	18	19	6.39	14.84	12.74	16.6	0	0
Schleier	11	10	11	12	82.18	83.6	78.55	81	12.81	13.35	19.31	21.89	21	23	82.86	79.83	12.76	20.26	8	11	9	10	-7.25	12.27	-7.22	-11.5	49.97	30.3	35.41	33.76	19	19	4.05	-9.47	39.74	33.65	0	0
Schleife	10	10	12	10	82.9	86.8	93.33	86.7	17.1	17.17	10.36	20.88	20	22	84.85	90.32	16.8	15.95	10	8	9	10	22.1	35.38	15.11	24.4	22.63	30.64	29.39	29.24	18	19	28	20	26.53	28.88	0	0
Schleim	10	10	13	10	75.6	82.2	63.23	66.8	29.16	13.61	25.2	27.43	20	23	78.9	64.78	22.4	25.64	10	8	10	9	-45.1	-52.38	-34.8	-8.22	29.98	30.99	28.9	46.86	18	19	-48.33	-22.21	29.75	39.74	0	0
Schlemmer	11	9	10	12	34.09	30.56	72.8	64.42	25.7	19.27	23.75	33.82	20	22	32.5	68.23	22.52	29.31	8	9	9	10	28.25	36.44	16.67	13.5	31.24	37.66	48.6	38.62	17	19	32.59	15	33.97	42.4	.08	.04
Schleuder	11	8	10	12	79.45	74.88	82.8	77.08	23.18	15.14	16.07	20.53	19	22	77.53	79.68	19.83	18.44	10	8	10	10	-4.4	-8.13	-23	-8.7	26.24	23.2	41.39	34.66	18	20	-6.06	-15.85	24.29	37.87	0	0
Schleuse	12	9	12	10	68.42	77.11	97.5	77.3	30.45	16.63	3.68	26.66	21	22	72.14	88.32	25.3	20.44	10	8	8	11	9.1	8.63	26.75	16.27	37.33	16.8	29.4	25.02	18	19	8.89	20.68	29.22	26.69	0	0
Schlinge	11	10	11	12	80.27	81	80.27	78.67	16.25	12.47	21.08	26.19	21	23	80.62	79.43	14.22	23.35	9	9	10	9	-26.89	-48.89	-33.8	-37.44	39.35	34.38	32.04	34.67	18	19	-37.89	-35.53	37.59	32.42	0	0
Schlips	10	10	11	11	87.9	90.7	93.91	86.36	12.89	8.81	8.13	16.07	20	22	89.3	90.14	10.84	13.01	9	9	9	10	-15.11	1.67	20.44	25.2	34.25	19.53	25.19	19.83	18	19	-6.72	22.95	28.39	22.02	0	0
Schlitten	11	10	12	11	91.27	95.3	94.83	90.91	6.94	6.63	9.36	7.09	21	23	93.19	92.96	6.94	8.41	9	9	8	11	27.44	48.11	40.63	42.64	28.44	36.79	33.31	26.23	18	19	37.78	41.79	33.63	28.55	0	0
Schloss	11	9	12	11	90	90.11	87.17	89.36	9.91	10.04	16.2	9.77	20	23	90.05	88.22	9.7	13.26	11	7	10	9	35.91	44.71	39	40.11	33.38	39.35	27.64	27.64	18	19	39.33	39.53	34.95	26.87	0	0
Schlosser	8	12	12	11	59.88	63.25	90	84	30.11	18.37	10.52	21.18	20	23	61.9	87.13	23.07	16.39	10	8	8	11	10.8	4.25	23.75	12.82	14.34	11.42	21.49	18.21	18	19	7.89	17.42	13.19	19.86	0	0
Schlucht	10	10	12	11	80.4	81.5	93.83	74.91	17.79	15.72	7.44	23.79	20	23	80.95	84.78	16.35	19.45	9	10	9	11	-15.44	-6	-9.56	-9.55	33.95	35.57	35.81	31.86	19	20	-10.47	-9.55	34.18	32.78	0	0
Schlüssel	10	10	12	11	89.5	92.8	97.25	91.91	13.46	9.25	3.6	6.63	20	23	91.15	94.7	11.37	5.82	10	9	9	10	12.8	15.78	29.33	23.5	21.27	13.75	34.44	17.88	19	19	14.21	26.26	17.68	26.38	0	0
Schmalz	10	11	12	11	63.9	84.55	85.33	80.91	31.17	13.84	18.95	18.27	21	23	74.71	83.22	25.39	18.34	11	8	8	11	-4.09	-18.25	34	20.64	16.13	22.2	25.46	52.47	19	19	-10.05	26.26	19.69	42.75	0	0
Schmerz	11	9	12	11	39.91	29.33	53.17	43.73	31.92	32.45	43.02	33.31	20	23	35.15	48.65	31.76	38.12	8	10	11	8	-70.5	-67.1	-55.55	-56.25	20.14	23.37	36.79	35.1	18	19	-68.61	-55.84	21.43	35.09	0	0
Schmied	9	10	13	10	72.67	65.4	93.54	80.8	26.95	20.28	8.13	16.29	19	23	68.84	88	23.29	13.65	11	7	10	9	18.27	18.86	27.5	35	26.68	27.61	20.67	24.74	18	19	18.5	31.05	26.23	22.37	0	0
Schminke	10	10	13	10	63.6	85.8	69.15	80.7	23.85	14.12	30.52	24.22	20	23	74.7	74.17	22.22	27.97	8	10	9	10	-1.13	36.1	-5.11	27.9	26.96	30.23	15.74	31.37	18	19	19.56	12.26	33.84	29.81	0	0
Schmuck	11	9	12	11	86.91	87.22	79.67	88.73	13.88	11.94	20.31	11.56	20	23	87.05	84	12.71	16.98	10	8	8	11	23.1	20	30.75	48.09	34.92	38.1	34.57	33.61	18	19	21.72	40.79	35.3	34.2	0	0
Schmutz	12	9	10	12	70.17	72.67	64.4	83.5	27.26	15.01	32.93	21.84	21	22	71.24	74.82	22.37	28.45	9	9	10	9	-32.11	-28.33	-58.7	-46.22	17.56	31.14	24.58	31.16	18	19	-30.22	-52.79	24.6	27.83	0	0
Schnabel	9	11	13	10	86.89	85.27	91.31	85.8	7.67	14.66	10.36	11.33	20	23	86	88.91	11.77	10.9	9	9	8	11	10.56	17.67	14.88	19	20.68	29.63	20.17	24.77	18	19	14.11	17.26	25.05	22.43	0	0
Schnaps	9	11	12	10	67.78	82.82	91.08	79.8	27.12	9.88	14.53	24.27	20	22	76.05	85.95	20.5	19.9	9	10	9	10	-2.67	-9.1	-43.89	-21.8	71.07	52.32	45.02	27.31	19	19	-6.05	-32.26	60.2	37.45	0	0
Schnauze	9	10	12	11	78.56	78.1	79.33	78.55	21.68	21.8	24.76	21.41	19	23	78.32	78.96	21.13	22.69	8	10	9	11	-7.88	-1.2	-11.56	-1.73	36.8	25.74	27.86	21.27	18	20	-4.17	-6.15	30.33	24.29	0	0
Schnecke	10	9	11	11	92.1	92.22	92.82	83.73	11.25	9.74	7.6	21.44	19	22	92.16	88.27	10.27	16.37	10	8	10	10	-1.8	16	2.3	-6.3	26.42	37.23	27.17	36.12	18	20	6.11	-2	31.99	31.42	0	0
Schnee	9	11	11	12	88	93.09	97	90.33	14.38	7.74	3.95	10.29	20	23	90.8	93.52	11.19	8.46	8	11	9	10	65.88	59.73	47.56	44.1	33.53	35.11	24.76	44.54	19	19	62.32	45.74	33.64	35.6	0	0
Schneeball	10	10	12	10	84.3	88.7	95.33	88.3	14.48	9.36	6.96	19.32	20	22	86.5	92.14	12.08	14.08	8	10	7	13	35.25	39.3	24	24.23	23.42	36.07	25.77	44.39	18	20	37.5	24.15	30.31	38.13	0	0
Schneemann	10	11	13	10	96.3	94.55	95.85	91.3	5.38	6.39	6	10.81	21	23	95.38	93.87	5.85	8.53	9	10	9	10	58.89	62.1	41.44	55.5	25.08	32.83	32.43	29.19	19	19	60.58	48.84	28.66	30.75	0	0
Schneider	10	10	10	12	59.9	66.2	89.6	80.25	28.09	21.13	12.2	27.32	20	22	63.05	84.5	24.41	21.85	9	10	9	10	21.22	17.5	31.89	26.7	18.93	18.48	24.14	21.09	19	19	19.26	29.16	18.27	22.1	0	0
Schnorchel	9	9	11	12	79.89	87.67	74.91	89.33	25.61	10.54	28.23	11.37	18	23	83.78	82.43	19.41	21.93	9	9	7	12	20.56	31	3.71	14.83	30.37	31.7	25.59	28.85	18	19	25.78	10.74	30.59	27.52	0	0
Schnupfen	10	10	12	11	61	55	72.42	73.36	35.39	26.77	26.02	23.5	20	23	58	72.87	30.7	24.28	10	8	10	9	-29.8	-31.5	-47.2	-61.33	32.29	25.9	25.82	25.9	18	19	-30.56	-53.89	28.79	26.16	0	0
Schnur	10	11	13	10	81.1	89.27	91.69	89.2	15.53	10.21	14.69	15.16	21	23	85.38	90.61	13.35	14.61	9	9	9	10	2.44	2.33	10.11	19.4	11.44	9.37	17.34	21.31	18	19	2.39	15	10.14	19.58	0	0
Schock	9	10	11	12	45.33	40.8	44	43.67	30.86	27.07	31.36	33.57	19	23	42.95	43.83	28.2	31.79	10	8	10	10	-38.4	-67.5	-43.5	-60.7	30.62	30.36	25.62	30.57	18	20	-51.33	-52.1	33.13	28.83	0	0
Scholle	10	9	14	9	73	69.33	92	78.33	26.34	22.93	11.27	21.8	19	23	71.26	86.65	24.17	17.16	9	10	11	8	2.89	6.1	41.36	22.63	23.91	15.7	35	44.39	19	19	4.58	33.47	19.5	39.21	0	0
Schöpfer	11	9	12	11	35.36	17.11	31.25	47.27	35.6	21.81	31.23	40.38	20	23	27.15	38.91	30.89	36	10	9	9	10	-9.8	26.33	45.56	11.6	46.86	43.01	47.8	33.49	19	19	7.32	27.68	47.58	43.35	0	0
Schoß	10	11	14	8	58.6	74	88.36	71.5	27.65	18.92	17.11	34.42	21	22	66.67	82.23	24.19	25.4	10	8	9	10	45.8	27.88	30.22	15.1	32.75	34.29	20.07	34.15	18	19	37.83	22.26	33.71	28.67	0	0
Schotter	12	9	11	12	74.92	70.89	78.91	78	25.98	17.6	16.82	25.74	21	23	73.19	78.43	22.35	21.45	9	9	9	10	14.67	-11.89	4.11	-18.5	31.73	14.91	15.94	18.73	18	19	1.39	-7.79	27.66	20.56	0	0
Schramme	10	10	13	10	75.5	79.3	77.77	86.2	16.79	16.15	28.22	17.27	20	23	77.4	81.43	16.15	23.98	8	10	10	9	-13.63	-32.1	-32.2	-23.33	37.26	26.32	31.79	19.02	18	19	-23.89	-28	32.05	26.21	0	0
Schrank	12	8	11	11	86.08	96	96.09	92.55	12.59	4.17	3.99	10.14	20	22	90.05	94.32	11.1	7.74	10	8	10	9	10	10.25	13.3	30.22	14.16	16.1	19.28	27.02	18	19	10.11	21.32	14.59	24.2	0	0
Schranke	9	11	11	12	87.33	86.09	93.18	83.08	20.89	11.7	11.42	24.8	20	23	86.65	87.91	16	19.84	9	10	9	10	-13.22	-23.5	-.33	.1	25.28	26.1	31.16	34.35	19	19	-18.63	-.11	25.55	31.96	0	0
Schranktür	10	9	12	11	88.1	86.33	92.92	89	10.64	11.31	8.71	11.4	19	23	87.26	91.04	10.69	10.05	10	9	10	9	-.4	-2.89	8.1	12.11	14.02	7.72	16.16	21.21	19	19	-1.58	10	11.24	18.29	0	0
Schraube	10	9	12	10	93.7	93.56	95.33	83.2	7.29	11.49	8.65	25.1	19	22	93.63	89.82	9.23	18.64	11	8	8	11	4.73	-5	13.75	3.09	13.54	10.9	12.65	17.01	19	19	.63	7.58	13.13	15.88	0	0
Schrei	11	10	12	10	50.73	49.7	41	48.6	30.97	34.63	26.91	31.98	21	22	50.24	44.45	31.93	28.86	10	9	10	9	-30.4	-53.44	-44.3	-41.56	29.55	27.08	37.62	16.42	19	19	-41.32	-43	30.04	28.8	0	0
Schrift	10	9	13	10	62	65.11	88.08	78.9	31.3	13.55	15.33	23.66	19	23	63.47	84.09	23.96	19.46	10	8	10	9	21.8	34.88	36.5	28.33	29.91	35.85	33.22	31.56	18	19	27.61	32.63	32.37	31.81	0	0
Schritt	10	10	12	10	49.7	47.4	64.75	77.1	32.97	25.37	30.03	28.51	20	22	48.55	70.36	28.66	29.33	10	9	9	10	11.5	14.33	11.78	21.1	13.77	15.16	15.43	27.34	19	19	12.84	16.68	14.11	22.42	0	0
Schrubber	11	9	12	10	70.82	84.33	83.92	88.2	21.07	16.3	27.16	10.92	20	22	76.9	85.86	19.83	21.03	10	9	9	10	-13.2	-17.78	-3.78	-3.1	14.34	18.58	11.38	34.72	19	19	-15.37	-3.42	16.18	25.7	0	0
Schublade	10	9	12	11	74.3	86.11	92.92	88.27	26.98	27.22	14.34	15.82	19	23	79.89	90.7	27.02	14.9	10	8	7	12	-5.7	-.75	8.14	10.58	15.56	10.86	9.04	14.11	18	19	-3.5	9.68	13.54	12.27	0	0
Schuh	11	8	11	12	88.64	95.63	95.55	95.67	9.5	7.19	8.66	4.77	19	23	91.58	95.61	9.1	6.75	8	10	9	10	20.38	-1.5	31.44	42.4	27.38	11.18	32.28	27.89	18	19	8.22	37.21	22.36	29.73	0	0
Schuld	9	9	11	12	14.33	9.89	29.64	41.08	13.15	7.29	34.35	30.18	18	23	12.11	35.61	10.57	32.03	11	7	11	8	-48.64	-58.71	-59.91	-59.5	31.87	27.63	37.11	29.09	18	19	-52.56	-59.74	29.87	33.08	0	0
Schule	11	8	11	10	69.55	71.75	82.82	90.3	27.46	22.26	29.09	10.74	19	21	70.47	86.38	24.76	22.13	10	8	7	12	18	-8.38	15.57	48	31.91	39.9	33.93	38.69	18	19	6.28	36.05	37.1	39.45	0	.04
Schüler	10	10	12	11	62.8	67.7	67.92	88.27	25.82	21.23	34.45	11.33	20	23	65.25	77.65	23.15	27.56	11	7	9	10	15.09	.86	31.78	37.2	25.2	38.99	29.27	43.65	18	19	9.56	34.63	31.01	36.62	0	0
Schulhof	9	11	13	10	72.44	69.91	86.92	87.9	22.78	19.86	19.23	15.31	20	23	71.05	87.35	20.68	17.26	8	10	8	11	16.63	-1.2	-4.5	25.36	37.49	32.29	26.02	32.51	18	19	6.72	12.79	34.84	32.86	0	0
Schulkind	11	10	13	10	67.36	76.1	86.62	85.2	18.4	12.19	15.12	12.68	21	23	71.52	86	16.01	13.82	10	8	10	10	17.7	28.75	46.2	60.2	13	31.74	32.62	30.73	18	20	22.61	53.2	23.16	31.67	0	0
Schulter	11	9	11	12	80.36	89.67	93.82	88.5	21.41	12.89	7.25	18.82	20	23	84.55	91.04	18.27	14.44	10	8	7	13	11.3	21.88	7	27.85	39.59	37.17	11.72	32.74	18	20	16	20.55	37.78	28.72	0	0
Schund	10	11	14	9	37.1	25.27	47.14	52.11	34.07	21.1	31	37.87	21	23	30.9	49.09	27.96	33.1	11	8	9	10	-42.82	-14.25	-42.56	-50.8	24.21	16.93	22.86	26.26	19	19	-30.79	-46.89	25.44	24.39	0	0
Schuppen	11	10	10	13	64.18	72	78.6	86.77	29.52	23.38	13.16	22.16	21	23	67.9	83.22	26.41	18.87	8	10	9	10	-13.38	-16.6	-25.78	-8.4	35.98	45.71	39.12	36.06	18	19	-15.17	-16.63	40.52	37.54	0	0
Schürze	9	12	13	10	69.22	80.58	94	88.3	31.08	18.05	14.18	19.81	21	23	75.71	91.52	24.47	16.69	8	10	9	10	8.25	6.5	17.89	22.3	18.82	24.31	19.32	43.43	18	19	7.28	20.21	21.44	33.37	0	0
Schüssel	10	11	12	11	83.2	93.45	91.33	90.45	26.4	9.79	15.06	19.08	21	23	88.57	90.91	19.72	16.7	9	9	9	10	7.56	7.22	20.56	24.8	4.33	9.4	22.86	26.63	18	19	7.39	22.79	7.11	24.33	0	0
Schwäche	10	9	11	12	29.3	26.22	45.18	45.25	21.91	21.9	32.12	35.26	19	23	27.84	45.22	21.35	33.02	10	9	10	9	-19	-21.11	-39	-50.78	33.65	56.26	34.1	32.16	19	19	-20	-44.58	44.43	32.83	0	0
Schwalbe	12	9	11	12	83.08	89	97.64	87.17	11.59	15.45	5.33	11.53	21	23	85.62	92.17	13.35	10.39	9	9	8	11	40.22	14.67	60.25	51.18	34.12	30.34	24.62	26.71	18	19	27.44	55	33.97	25.56	0	0
Schwamm	11	9	12	11	75	93.22	94.5	93.55	30.03	7.5	6.74	10.35	20	23	83.2	94.04	24.18	8.46	9	9	8	11	20	23.44	1.75	18.73	23.51	30.02	35.09	24.31	18	19	21.72	11.58	26.22	29.69	0	0
Schwan	9	10	11	12	89.78	96.3	97.36	88.25	9.69	4.67	4.01	13.02	19	23	93.21	92.61	7.99	10.66	10	9	10	9	29.7	53.56	64.3	53.67	38.07	26.88	22.04	35.04	19	19	41	59.26	34.58	28.61	0	0
Schwanz	11	11	12	10	85.27	91.73	87.25	89.5	13.9	7.99	17.64	13.69	22	22	88.5	88.27	11.55	15.64	9	9	9	10	12.56	2.22	11.11	7.7	42.26	47.2	14.49	30.94	18	19	7.39	9.32	43.79	23.98	0	0
Schweif	10	10	12	10	70.2	72.8	75.5	75	29.13	21.99	29.78	29.08	20	22	71.5	75.27	25.16	28.76	10	9	9	10	25.2	29.44	14.11	19.6	22.08	20.16	20.84	22.9	19	19	27.21	17	20.72	21.52	0	0
Schwein	12	9	12	10	93.25	95.33	97.33	91.2	9.22	7.19	3.6	11.99	21	22	94.14	94.55	8.28	8.84	9	9	10	10	-1.33	6.89	32.9	2.9	39.77	38.22	33.01	42.95	18	20	2.78	17.9	38.08	40.33	0	0
Schweiß	11	10	12	11	66.73	75	72.33	81.45	30.62	17.88	32.53	26.67	21	23	70.67	76.7	25.11	29.57	10	9	8	11	5.8	-33.56	-14	-46.73	35.04	27.96	27.5	36.69	19	19	-12.84	-32.95	37	36.3	0	0
Schwelle	9	11	14	9	66.56	55.09	74.5	79.11	31.91	27	28.47	27.91	20	23	60.25	76.3	29.09	27.7	9	9	10	9	-1.78	-4.11	.4	3.89	15.83	9.03	18.05	21.19	18	19	-2.94	2.05	12.56	19.12	0	0
Schwert	8	11	13	9	93.38	90.55	91.92	78.22	8.11	8.49	11.55	24.05	19	22	91.74	86.32	8.22	18.55	11	7	9	10	-7.27	-14.71	-54.56	-41.4	32.2	33.58	34.33	29.08	18	19	-10.17	-47.63	31.97	31.5	0	0
Schwester	10	11	11	12	54.5	59	66.91	86.25	34.97	30.12	37.74	14.4	21	23	56.86	77	31.77	29.13	9	9	9	10	53.78	18.67	80	49.2	40.21	55.88	27.49	45.57	18	19	36.22	63.79	50.56	40.3	0	0
Schwimmbad	9	11	13	10	77	90.09	91.62	91	19.88	6.7	12.85	6.43	20	23	84.2	91.35	15.32	10.35	9	9	9	10	41.11	37	43.89	73.7	28.08	48.77	28.02	23.74	18	19	39.06	59.58	38.66	29.4	0	0
Schwimmer	10	9	11	12	76.7	79.44	83.36	86.33	21.68	13.57	20.41	15.19	19	23	78	84.91	17.86	17.52	9	9	9	10	34.67	28	34.89	43.7	26.57	35.26	35.63	22.18	18	19	31.33	39.53	30.48	28.82	0	0
Schwur	12	7	11	12	28.67	30.14	52.45	52.58	24.86	22.21	32.44	36.83	19	23	29.21	52.52	23.29	34.01	10	8	10	9	4.6	-12.25	3.9	16.56	31.57	13.65	23.27	32.33	18	19	-2.89	9.89	26.05	27.88	0	0
See	11	10	12	11	86.73	93.1	95	91.09	13.06	5.43	6.73	10.51	21	23	89.76	93.13	10.45	8.77	9	10	8	11	51	57.1	55.88	56.45	27.73	29.11	29.52	25.34	19	19	54.21	56.21	27.84	26.38	0	0
Seegang	11	9	11	11	70.91	62.56	74.45	74.36	30.66	22.82	26.89	22.22	20	22	67.15	74.41	27.06	24.07	10	9	9	10	2.1	-1.22	-17.78	-32.6	36.4	48.06	38.91	48.31	19	19	.53	-25.58	41.13	43.57	0	0
Seehund	10	10	14	10	88.6	87	96.29	93.6	13.1	14.42	6.99	6.45	20	24	87.8	95.17	13.43	6.76	10	8	9	10	46.7	55.75	59.67	51.5	31.53	33.3	21.32	33.51	18	19	50.72	55.37	31.69	27.95	0	0
Seeigel	10	10	11	11	80.6	86.1	77.82	80.73	14.92	15.65	29.1	22.18	20	22	83.35	79.27	15.15	25.29	11	8	10	9	3.09	4.88	2.6	6.78	41.32	47.07	46.06	39.97	19	19	3.84	4.58	42.56	42.14	0	0
Seele	11	10	11	11	23.18	14.9	24.64	27.18	33.68	16.26	31.35	33.32	21	22	19.24	25.91	26.53	31.6	9	11	8	12	39	51	45.5	34	33.7	32	29.24	38.92	20	20	45.6	38.6	32.48	35.01	0	0
Seemann	11	8	12	11	75	67.38	81.17	83.45	23.26	23.75	23.94	25.01	19	23	71.79	82.26	23.13	23.92	10	9	9	11	24.1	31.56	25.22	21.91	22.79	29.79	27.64	21.44	19	20	27.63	23.4	25.86	23.8	0	0
Seepferd	11	9	13	10	94.27	90.89	91.31	83.2	7.42	12.78	12.18	20.49	20	23	92.75	87.78	10.04	16.42	9	9	10	9	43.56	50.11	44.3	40.11	23.23	36.59	28.53	19.66	18	19	46.83	42.32	29.93	24.16	0	0
Seerose	10	9	13	10	85.3	92.67	92.54	88.6	11.72	7.78	10.26	13.62	19	23	88.79	90.83	10.48	11.72	10	9	9	10	44.6	48.89	61.67	63.7	28.29	33.75	20.3	16.55	19	19	46.63	62.74	30.19	17.93	0	0
Seestern	10	11	10	12	92.4	89.18	88.6	82.67	9.07	12.11	15.3	15.89	21	22	90.71	85.36	10.63	15.55	9	9	8	12	19.44	56.33	33.25	31.17	24.89	30.12	36.78	21.83	18	20	37.89	32	32.84	27.85	0	0
Segel	10	10	14	9	83.8	84.1	95.71	94	17.22	17.01	6.59	5.74	20	23	83.95	95.04	16.66	6.2	8	11	8	11	30.75	49	32.63	32.27	28.14	40.85	23.14	27.21	19	19	41.32	32.42	36.34	24.89	0	0
Segelboot	10	10	12	11	92.8	88	96.58	88.55	9.75	14.72	7.08	12.23	20	23	90.4	92.74	12.4	10.48	10	9	9	10	35	54.89	58	43.6	25.1	35.02	30.76	16.22	19	19	44.42	50.42	31.05	24.63	0	0
Segen	10	10	11	12	27.9	17.8	52.73	39.42	30.69	16.68	34.31	32.76	20	23	22.85	45.78	24.59	33.44	11	7	10	9	25.55	32.71	54	31.22	49.49	29.36	36.77	31.78	18	19	28.33	43.21	41.93	35.52	0	0
Seide	8	12	12	11	74.88	80.08	83.17	89.64	12.46	18.04	23.52	11.2	20	23	78	86.26	15.89	18.56	9	9	10	9	35.78	46.44	35.6	60.67	20.58	33.41	23.6	26.9	18	19	41.11	47.47	27.47	27.67	0	0
Seife	12	9	12	11	85.08	88.67	93.83	89	16.48	20.35	8.31	18.41	21	23	86.62	91.52	17.84	13.95	9	9	9	10	27.67	23.11	38.78	36.1	15.25	30.32	28.75	33.6	18	19	25.39	37.37	23.4	30.56	0	0
Seil	10	9	12	11	88.9	93	93.83	85.36	14.34	7.28	10.52	20.81	19	23	90.84	89.78	11.44	16.46	10	8	10	9	3.6	12.88	23.8	11.67	18.09	25.15	26.42	22.64	18	19	7.72	18.05	21.36	24.81	0	0
Seiltänzer	11	8	12	10	72.09	80.25	85.33	88.1	21.58	9.05	18.73	16.23	19	22	75.53	86.59	17.54	17.28	9	9	9	11	5.33	33.89	2.67	20.27	16.21	43	27.84	21.68	18	20	19.61	12.35	34.78	25.59	0	0
Seite	10	10	12	10	63.3	66.9	71	78.9	32.8	24.75	27.35	24.15	20	22	65.1	74.59	28.34	25.65	10	9	11	9	7.6	16.78	10.18	13.44	13.94	32.68	16.96	15.92	19	20	11.95	11.65	24.37	16.15	0	0
Sekt	10	10	12	11	86.4	88.1	94	89.64	11.06	13.91	7.75	9.35	20	23	87.25	91.91	12.26	8.64	9	9	10	10	20.67	33.56	30.5	57.5	44.62	36.23	31.44	28.08	18	20	27.11	44	39.99	32.15	0	0
Selbst	10	10	12	11	23.1	21	18.92	42.55	31.52	19.53	22.71	37.09	20	23	22.05	30.22	25.54	32.08	11	8	9	10	26.45	27.13	1.56	21.3	35.45	27.02	3.5	37.55	19	19	26.74	11.95	31.34	28.51	0	0
[truncated: 593 more rows]
