# Supplementary material for: Vampires and nurses are rated differently by younger and older adults—Age-comparative norms of imageability and emotionality for about 2500 German nouns
Source: Behav Res Methods. 2020 Feb 12;52(3):980–9. doi: 10.3758/s13428-019-01294-2 (PMC7280351; doi:10.3758/s13428-019-01294-2)
Supplement: Supplementary file 2 — (DAT 2.60 kb) [file 13428_2019_1294_MOESM2_ESM.dat]

IM_Y_M_N	= Imageability, number of valid ratings, younger adults, male
IM_Y_F_N	= Imageability, number of valid ratings, younger adults, female
IM_O_M_N	= Imageability, number of valid ratings, older adults, male
IM_O_F_N	= Imageability, number of valid ratings, older adults, female
IM_Y_M_MEAN	= Imageability, average rating, younger adults, male
IM_Y_F_MEAN	= Imageability, average rating, younger adults, female
IM_O_M_MEAN	= Imageability, average rating, older adults, male
IM_O_F_MEAN	= Imageability, average rating, older adults, female
IM_Y_M_SD	= Imageability, standard deviation of ratings, younger adults, male
IM_Y_F_SD	= Imageability, standard deviation of ratings, younger adults, female
IM_O_M_SD	= Imageability, standard deviation of ratings, older adults, male
IM_O_F_SD	= Imageability, standard deviation of ratings, older adults, female
IM_Y_N		= Imageability, number of valid ratings, younger adults
IM_O_N		= Imageability, number of valid ratings, older adults
IM_Y_MEAN	= Imageability, average rating, younger adults
IM_O_MEAN	= Imageability, average rating, older adults
IM_Y_SD		= Imageability, standard deviation of ratings, younger adults
IM_O_SD		= Imageability, standard deviation of ratings, older adults
EM_Y_M_N	= Emotionality, number of valid ratings, younger adults, male
EM_Y_F_N	= Emotionality, number of valid ratings, younger adults, female
EM_O_M_N	= Emotionality, number of valid ratings, older adults, male
EM_O_F_N	= Emotionality, number of valid ratings, older adults, female
EM_Y_M_MEAN	= Emotionality, average rating, younger adults, male
EM_Y_F_MEAN	= Emotionality, average rating, younger adults, female
EM_O_M_MEAN	= Emotionality, average rating, older adults, male
EM_O_F_MEAN	= Emotionality, average rating, older adults, female
EM_Y_M_SD	= Emotionality, standard deviation of ratings, younger adults, male
EM_Y_F_SD	= Emotionality, standard deviation of ratings, younger adults, female
EM_O_M_SD	= Emotionality, standard deviation of ratings, older adults, male
EM_O_F_SD	= Emotionality, standard deviation of ratings, older adults, female
EM_Y_N		= Emotionality, number of valid ratings, younger adults
EM_O_N		= Emotionality, number of valid ratings, older adults
EM_Y_MEAN	= Emotionality, average rating, younger adults
EM_O_MEAN	= Emotionality, average rating, older adults
EM_Y_SD		= Emotionality, standard deviation of ratings, younger adults
EM_O_SD		= Emotionality, standard deviation of ratings, older adults
F_Unknown_Y	= Relative frequency of younger adults indicating the word as ‘unknown’ 
F_Unknown_O	= Relative frequency of older adults indicating the word as ‘unknown’ 
